# Supplementary material for: Immunoproteomic profile of Malus domestica in Mexican pediatric patients. Evidence of new allergen prospects
Source: Royal Society of Chemistry journal article supplement (doi:10.1039/d4fo00064a), 2024-01-01
Supplement: d4fo00064a1.xlsx [file d4fo00064a1.xlsx]

## Sheet: Spot 1
Accession #	Name
tr|A0A498H9U4|A0A498H9U4_MALDO	14_3_3 domain-containing protein OS=Malus domestica OX=3750 GN=DVH24_028363 PE=3 SV=1
Accessions	Names	%Cov(95)	Contrib	Conf	Sequence	Modifications	ProteinModifications	Cleavages	dMass	Obs MW	Obs m/z	Theor MW	Theor m/z	Theor z	Sc	Spectrum	Acq Time	Intensity (Peptide)	PrecursorIntensityAcquisition	Apex Time (Peptide)	Elution Peak Width (Peptide)	MS2Counts
tr|A0A498H9U4|A0A498H9U4_MALDO	14_3_3 domain-containing protein OS=Malus domestica OX=3750 GN=DVH24_028363 PE=3 SV=1	25.92	2	99	DNLTLWTSDITDDAGDEIK				-0.000389439	2120.97	707.999	2120.97	707.999	3	24	1.1.1.2217.6	26.4956	68014.7	63824.3	26.53	0.28	10563.2
tr|A0A498H9U4|A0A498H9U4_MALDO	14_3_3 domain-containing protein OS=Malus domestica OX=3750 GN=DVH24_028363 PE=3 SV=1	25.92	2	99	DNLTLWTSDITDDAGDEIKEASK			missed K-E@19	0.00029177	2536.18	846.401	2536.18	846.401	3	24	1.1.1.2224.10	26.6583	148991	95167.9	26.53	0.35	7612.69
tr|A0A498H9U4|A0A498H9U4_MALDO	14_3_3 domain-containing protein OS=Malus domestica OX=3750 GN=DVH24_028363 PE=3 SV=1	25.92	2	99	DSTLIMQLLR				-0.00104382	1188.65	595.334	1188.65	595.334	2	14	1.1.1.2314.2	28.8097	170339	3525.45	29.11	0.38	575.471
tr|A0A498H9U4|A0A498H9U4_MALDO	14_3_3 domain-containing protein OS=Malus domestica OX=3750 GN=DVH24_028363 PE=3 SV=1	25.92	2	99	EENVYMAK	Glu->pyro-Glu@N-term; Oxidation(M)@6			0.00338239	980.431	491.223	980.427	491.221	2	12	1.1.1.1621.4	12.5353	2757.69	2652	12.52	0.14	548.221
tr|A0A498H9U4|A0A498H9U4_MALDO	14_3_3 domain-containing protein OS=Malus domestica OX=3750 GN=DVH24_028363 PE=3 SV=1	25.92	2	99	GNEDHVAIIKEYR			missed K-E@10	0.00271564	1542.78	772.398	1542.78	772.397	2	15	1.1.1.1681.20	13.9497	12992.7	6203.01	14	0.12	476.506
tr|A0A498H9U4|A0A498H9U4_MALDO	14_3_3 domain-containing protein OS=Malus domestica OX=3750 GN=DVH24_028363 PE=3 SV=1	25.92	2	99	ICDGILNLLESHLIPSASSAESK	Carbamidomethyl(C)@2			-0.000182354	2453.25	818.756	2453.25	818.756	3	28	1.1.1.2366.15	30.0587	294648	134007	30.11	0.07	11969.3
tr|A0A498H9U4|A0A498H9U4_MALDO	14_3_3 domain-containing protein OS=Malus domestica OX=3750 GN=DVH24_028363 PE=3 SV=1	25.92	2	99	IISSIEQKEESR	Deamidated(Q)@7		missed K-E@8	0.00551721	1418.73	710.373	1418.73	710.37	2	13	1.1.1.1611.12	12.3004	7482.37	6622.14	12.31	0.23	614.391
tr|A0A498H9U4|A0A498H9U4_MALDO	14_3_3 domain-containing protein OS=Malus domestica OX=3750 GN=DVH24_028363 PE=3 SV=1	25.92	2	99	KEAAESTLLAYK			missed K-E@1	0.00334289	1322.71	662.363	1322.71	662.361	2	21	1.1.1.1750.6	15.5415	138287	40044.1	15.69	0.23	3076.57
tr|A0A498H9U4|A0A498H9U4_MALDO	14_3_3 domain-containing protein OS=Malus domestica OX=3750 GN=DVH24_028363 PE=3 SV=1	25.92	2	99	LAEQAERYEEMVEFMEK			missed R-Y@7	0.00142518	2130.96	711.328	2130.96	711.327	3	16	1.1.1.2169.11	25.3509	110145	28416.7	25.13	0.28	1907.18
tr|A0A498H9U4|A0A498H9U4_MALDO	14_3_3 domain-containing protein OS=Malus domestica OX=3750 GN=DVH24_028363 PE=3 SV=1	25.92	2	99	QAFDEAISELDTLGEESYK				0.000265384	2143.98	715.667	2143.98	715.667	3	21	1.1.1.2283.10	28.0926	35808.8	26240.3	27.98	0.27	2204.49
tr|A0A498H9U4|A0A498H9U4_MALDO	14_3_3 domain-containing protein OS=Malus domestica OX=3750 GN=DVH24_028363 PE=3 SV=1	25.92	2	99	TVDVEELTVEER				-0.000702689	1417.69	709.854	1417.69	709.854	2	15	1.1.1.1986.14	21.0648	7504.28	5956.27	20.72	0.45	1098.46
tr|A0A498H9U4|A0A498H9U4_MALDO	14_3_3 domain-containing protein OS=Malus domestica OX=3750 GN=DVH24_028363 PE=3 SV=1	25.92	2	99	YEEMVEFMEK	Oxidation(M)@4; Oxidation(M)@8			0.00050703	1365.55	683.781	1365.55	683.781	2	17	1.1.1.1745.12	15.4252	39364.9	25226.8	15.3	0.33	2387.8
tr|A0A498H9U4|A0A498H9U4_MALDO	14_3_3 domain-containing protein OS=Malus domestica OX=3750 GN=DVH24_028363 PE=3 SV=1	25.92	1.18046	94.1	SKIEAELSK			missed K-I@2	0.000853718	1003.56	502.785	1003.55	502.785	2	10	1.1.1.1566.2	11.2402	2078.92	1230.96	11.33	0.16	144.013
tr|A0A498H9U4|A0A498H9U4_MALDO	14_3_3 domain-containing protein OS=Malus domestica OX=3750 GN=DVH24_028363 PE=3 SV=1	25.92	1.17393	99	SAQDIALAELAPTHPIR	Deamidated(Q)@3			0.000457017	1802.95	601.992	1802.95	601.992	3	21	1.1.1.2059.8	22.7787	34535.1	34529.2	22.79	0.26	4250.8
tr|A0A498H9U4|A0A498H9U4_MALDO	14_3_3 domain-containing protein OS=Malus domestica OX=3750 GN=DVH24_028363 PE=3 SV=1	25.92	1.03621	99	EAAESTLLAYK	Glu->pyro-Glu@N-term			0.00153283	1176.6	589.309	1176.6	589.309	2	14	1.1.1.1988.3	21.1035	24381.1	3658.9	21.31	0.29	624.186
tr|A0A498H9U4|A0A498H9U4_MALDO	14_3_3 domain-containing protein OS=Malus domestica OX=3750 GN=DVH24_028363 PE=3 SV=1	25.92	0.415669	88.42	NLLSVAYK	Deamidated(N)@1			0.000290631	907.502	454.758	907.501	454.758	2	12	1.1.1.1945.3	20.0888	33637.2	33363	20.08	0.29	6412.83
tr|A0A498H9U4|A0A498H9U4_MALDO	14_3_3 domain-containing protein OS=Malus domestica OX=3750 GN=DVH24_028363 PE=3 SV=1	25.92	0.236572	99	NLLSVAYKNVIGAR	Carbamyl(K)@8		missed K-N@8	-0.000368583	1559.88	780.946	1559.88	780.946	2	23	1.1.1.2274.10	27.8733	14665.8	14398.4	27.86	0.15	1657.05
tr|A0A498H9U4|A0A498H9U4_MALDO	14_3_3 domain-containing protein OS=Malus domestica OX=3750 GN=DVH24_028363 PE=3 SV=1	25.92	0.201349	46.06	IISSIEQKEESRGNEDHVAIIK			missed K-E@8; missed R-G@12	0.000269608	2494.3	624.583	2494.3	624.583	4	12	1.1.1.1737.5	15.2391	52347.2	4583.43	14.88	0.21	1338.96
tr|A0A498H9U4|A0A498H9U4_MALDO	14_3_3 domain-containing protein OS=Malus domestica OX=3750 GN=DVH24_028363 PE=3 SV=1	25.92	0.191789	41.02	TGGERKEAAESTLLAYK			missed R-K@5; missed K-E@6	-0.00197635	1822.94	456.742	1822.94	456.743	4	10	1.1.1.1729.3	15.0495	1219.32	1192.28	15.04	0.14	1061.94
tr|A0A498H9U4|A0A498H9U4_MALDO	14_3_3 domain-containing protein OS=Malus domestica OX=3750 GN=DVH24_028363 PE=3 SV=1	25.92	0.108463	94.69	DNLTLWTSDITDDAGDEIKEASKR	Oxidation(W)@6		missed K-E@19; missed K-R@23	-0.00544381	2708.27	678.075	2708.28	678.077	4	16	1.1.1.2060.2	22.7978	1813	1555.79	22.77	0.3	548.003
tr|A0A498H9U4|A0A498H9U4_MALDO	14_3_3 domain-containing protein OS=Malus domestica OX=3750 GN=DVH24_028363 PE=3 SV=1	25.92	0.047692	87.43	SVFYYEILNSPDR			cleaved F-S@N-term	0.000127479	1601.77	801.894	1601.77	801.894	2	11	1.1.1.2158.9	25.0922	2371.44	906.05	24.98	0.31	265.887
tr|A0A498H9U4|A0A498H9U4_MALDO	14_3_3 domain-containing protein OS=Malus domestica OX=3750 GN=DVH24_028363 PE=3 SV=1	25.92	0.0400052	46.78	SPPDSSREENVYMAK			cleaved M-S@N-term; missed R-E@7	0.00356993	1708.78	855.395	1708.77	855.394	2	11	1.1.1.1620.6	12.5186	9808.44	3770.96	12.62	0.16	245.915
tr|A0A498H9U4|A0A498H9U4_MALDO	14_3_3 domain-containing protein OS=Malus domestica OX=3750 GN=DVH24_028363 PE=3 SV=1	25.92	0.0273344	98.27	YLAEFKTGGER	Carbamyl(K)@6		missed K-T@6	-0.00183778	1312.64	657.327	1312.64	657.328	2	12	1.1.1.1818.4	17.1369	11841.9	2549.12	17.29	0.19	527.831
tr|A0A498H9U4|A0A498H9U4_MALDO	14_3_3 domain-containing protein OS=Malus domestica OX=3750 GN=DVH24_028363 PE=3 SV=1	25.92	0.0245682	92.24	LIPSASSAESK			cleaved H-L@N-term	0.00230689	1088.57	545.294	1088.57	545.293	2	9	1.1.1.1587.2	11.7295	4021.08	3169.2	11.77	0.12	253.611
tr|A0A498H9U4|A0A498H9U4_MALDO	14_3_3 domain-containing protein OS=Malus domestica OX=3750 GN=DVH24_028363 PE=3 SV=1	25.92	0.0172766	95.99	SSIEQKEESR			cleaved I-S@N-term; missed K-E@6	0.00258294	1191.58	596.795	1191.57	596.794	2	11	1.1.1.1603.2	12.1071	9819.42	8148.66	12.06	0.12	312.964
tr|A0A498H9U4|A0A498H9U4_MALDO	14_3_3 domain-containing protein OS=Malus domestica OX=3750 GN=DVH24_028363 PE=3 SV=1	25.92	0.0114411	94.65	DNLTLWTSDITDDAGDEIKEA			cleaved A-S@C-term; missed K-E@19	0.00226063	2321.06	774.693	2321.05	774.692	3	16	1.1.1.2236.12	26.9486	4380.22	1937.78	27.13	0.34	422.032
tr|A0A498H9U4|A0A498H9U4_MALDO	14_3_3 domain-containing protein OS=Malus domestica OX=3750 GN=DVH24_028363 PE=3 SV=1	25.92	0.00877392	23.68	IISSIEQK	Deamidated(Q)@7			0.0181948	917.525	459.77	917.507	459.761	2	9	1.1.1.1619.3	12.4871	5193.35	1649.48	12.66	0.14	791.899
tr|A0A498H9U4|A0A498H9U4_MALDO	14_3_3 domain-containing protein OS=Malus domestica OX=3750 GN=DVH24_028363 PE=3 SV=1	25.92	0.00612308	89.49	YYEILNSPDR			cleaved F-Y@N-term	0.0025513	1268.61	635.31	1268.6	635.309	2	10	1.1.1.1851.5	17.893	2095.64	1335.23	18.03	0.35	320.181
tr|A0A498H9U4|A0A498H9U4_MALDO	14_3_3 domain-containing protein OS=Malus domestica OX=3750 GN=DVH24_028363 PE=3 SV=1	25.92	0.00217692	99	GNEDHVAIIK	Dimethyl(N)@2	Dimethyl(N)@167		0.000433767	1122.6	562.309	1122.6	562.309	2	15	1.1.1.1705.9	14.4969	17131.6	15271.1	14.53	0.14	1723.91
tr|A0A498H9U4|A0A498H9U4_MALDO	14_3_3 domain-containing protein OS=Malus domestica OX=3750 GN=DVH24_028363 PE=3 SV=1	25.92	0.000434506	37.57	VFYLKMK	Carbamyl(K)@5		missed K-M@5	0.00282247	970.534	486.274	970.531	486.273	2	7	1.1.1.2004.2	21.4847	45658.7	3209.32	21.19	0.22	692.004
tr|A0A498H9U4|A0A498H9U4_MALDO	14_3_3 domain-containing protein OS=Malus domestica OX=3750 GN=DVH24_028363 PE=3 SV=1	25.92	0	81.05	DNLTLWTSDITDDAGDEIK				0.0032727	2120.98	708	2120.97	707.999	3	11	1.1.1.2174.14	25.4751	1711.78	1490	25.41	0.29	620.338
tr|A0A498H9U4|A0A498H9U4_MALDO	14_3_3 domain-containing protein OS=Malus domestica OX=3750 GN=DVH24_028363 PE=3 SV=1	25.92	0	58.67	DNLTLWTSDITDDAGDEIK	Trp->Kynurenin(W)@6; Delta:H(4)C(2)(K)@19			-0.00371777	2153	718.673	2153	718.674	3	9	1.1.1.2260.11	27.5334	765.74	463.44	27.38	0.29	308.686
tr|A0A498H9U4|A0A498H9U4_MALDO	14_3_3 domain-containing protein OS=Malus domestica OX=3750 GN=DVH24_028363 PE=3 SV=1	25.92	0	44.47	DNLTLWTSDITDDAGDEIK	Trp->Kynurenin(W)@6; Dimethyl(K)@19	Dimethyl(K)@336		-0.00371777	2153	718.673	2153	718.674	3	9	1.1.1.2260.11	27.5334	765.74	463.44	27.38	0.29	308.686
tr|A0A498H9U4|A0A498H9U4_MALDO	14_3_3 domain-containing protein OS=Malus domestica OX=3750 GN=DVH24_028363 PE=3 SV=1	25.92	0	43.8	DNLTLWTSDITDDAGDEIK				-0.000755654	2120.97	707.999	2120.97	707.999	3	5	1.1.1.2269.10	27.7521	1312.95	312.62	27.35	0.39	206.885
tr|A0A498H9U4|A0A498H9U4_MALDO	14_3_3 domain-containing protein OS=Malus domestica OX=3750 GN=DVH24_028363 PE=3 SV=1	25.92	0	28.3	DNLTLWTSDITDDAGDEIK				0.0071416	2120.98	531.253	2120.97	531.251	4	5	1.1.1.2215.3	26.4418	461.98	393.13	26.48	0.16	281.399
tr|A0A498H9U4|A0A498H9U4_MALDO	14_3_3 domain-containing protein OS=Malus domestica OX=3750 GN=DVH24_028363 PE=3 SV=1	25.92	0	26.68	DNLTLWTSDITDDAGDEIK				0.00144163	2120.98	707.999	2120.97	707.999	3	6	1.1.1.2195.10	25.9744	2304.57	2282.39	25.99	0.31	496.563
tr|A0A498H9U4|A0A498H9U4_MALDO	14_3_3 domain-containing protein OS=Malus domestica OX=3750 GN=DVH24_028363 PE=3 SV=1	25.92	0	91.01	DNLTLWTSDITDDAGDEIKEASK			missed K-E@19	0.00029177	2536.18	846.401	2536.18	846.401	3	25	1.1.1.2219.10	26.5471	148991	142166	26.53	0.35	20658
tr|A0A498H9U4|A0A498H9U4_MALDO	14_3_3 domain-containing protein OS=Malus domestica OX=3750 GN=DVH24_028363 PE=3 SV=1	25.92	0	89.26	DNLTLWTSDITDDAGDEIKEASK			missed K-E@19	0.00461689	2536.19	635.054	2536.18	635.053	4	13	1.1.1.2230.5	26.7963	12519.5	2764.04	26.53	0.33	1070.42
tr|A0A498H9U4|A0A498H9U4_MALDO	14_3_3 domain-containing protein OS=Malus domestica OX=3750 GN=DVH24_028363 PE=3 SV=1	25.92	0	58.67	DNLTLWTSDITDDAGDEIKEASK			missed K-E@19	0.00029177	2536.18	846.401	2536.18	846.401	3	9	1.1.1.2245.10	27.1664	148991	3847.9	26.53	0.35	454.517
tr|A0A498H9U4|A0A498H9U4_MALDO	14_3_3 domain-containing protein OS=Malus domestica OX=3750 GN=DVH24_028363 PE=3 SV=1	25.92	0	45.17	DNLTLWTSDITDDAGDEIKEASK			missed K-E@19	0.00029177	2536.18	846.401	2536.18	846.401	3	7	1.1.1.2202.14	26.1452	148991	1611.85	26.53	0.35	273.183
tr|A0A498H9U4|A0A498H9U4_MALDO	14_3_3 domain-containing protein OS=Malus domestica OX=3750 GN=DVH24_028363 PE=3 SV=1	25.92	0	26.99	DNLTLWTSDITDDAGDEIKEASK			missed K-E@19	0.00029177	2536.18	846.401	2536.18	846.401	3	6	1.1.1.2266.12	27.6807	148991	1127.45	26.53	0.35	278.251
tr|A0A498H9U4|A0A498H9U4_MALDO	14_3_3 domain-containing protein OS=Malus domestica OX=3750 GN=DVH24_028363 PE=3 SV=1	25.92	0	20.66	DNLTLWTSDITDDAGDEIKEASK			missed K-E@19	-0.00282105	2536.18	846.4	2536.18	846.401	3	7	1.1.1.2158.10	25.0938	2231.5	1185.51	24.91	0.36	310.716
tr|A0A498H9U4|A0A498H9U4_MALDO	14_3_3 domain-containing protein OS=Malus domestica OX=3750 GN=DVH24_028363 PE=3 SV=1	25.92	0	94.65	DNLTLWTSDITDDAGDEIKEASKR			missed K-E@19; missed K-R@23	0.00407505	2692.29	674.079	2692.28	674.078	4	18	1.1.1.2209.7	26.3036	126607	31500.2	26.04	0.38	4188.44
tr|A0A498H9U4|A0A498H9U4_MALDO	14_3_3 domain-containing protein OS=Malus domestica OX=3750 GN=DVH24_028363 PE=3 SV=1	25.92	0	94.28	DNLTLWTSDITDDAGDEIKEASKR	Dioxidation(W)@6		missed K-E@19; missed K-R@23	-0.000403918	2724.27	682.075	2724.27	682.075	4	18	1.1.1.2119.4	24.1877	6178.11	5782.77	24.21	0.31	2316.13
tr|A0A498H9U4|A0A498H9U4_MALDO	14_3_3 domain-containing protein OS=Malus domestica OX=3750 GN=DVH24_028363 PE=3 SV=1	25.92	0	93.2	DNLTLWTSDITDDAGDEIKEASKR			missed K-E@19; missed K-R@23	-0.000717599	2692.28	674.078	2692.28	674.078	4	13	1.1.1.2075.8	23.1506	2243.26	1341.87	23.21	0.14	524.883
tr|A0A498H9U4|A0A498H9U4_MALDO	14_3_3 domain-containing protein OS=Malus domestica OX=3750 GN=DVH24_028363 PE=3 SV=1	25.92	0	91.01	DNLTLWTSDITDDAGDEIKEASKR			missed K-E@19; missed K-R@23	0.00407505	2692.29	674.079	2692.28	674.078	4	24	1.1.1.2199.5	26.0681	126607	126028	26.04	0.38	11403.1
tr|A0A498H9U4|A0A498H9U4_MALDO	14_3_3 domain-containing protein OS=Malus domestica OX=3750 GN=DVH24_028363 PE=3 SV=1	25.92	0	69.05	DNLTLWTSDITDDAGDEIKEASKR			missed K-E@19; missed K-R@23	0.00123555	2692.28	674.078	2692.28	674.078	4	9	1.1.1.2101.10	23.7593	1838.29	1800.33	23.77	0.17	620.338
tr|A0A498H9U4|A0A498H9U4_MALDO	14_3_3 domain-containing protein OS=Malus domestica OX=3750 GN=DVH24_028363 PE=3 SV=1	25.92	0	45.17	DNLTLWTSDITDDAGDEIKEASKR			missed K-E@19; missed K-R@23	0.00407505	2692.29	674.079	2692.28	674.078	4	13	1.1.1.2185.12	25.7396	126607	18012.4	26.04	0.38	7378.68
tr|A0A498H9U4|A0A498H9U4_MALDO	14_3_3 domain-containing protein OS=Malus domestica OX=3750 GN=DVH24_028363 PE=3 SV=1	25.92	0	44.47	DNLTLWTSDITDDAGDEIKEASKR	Carbamyl(K)@19		missed K-E@19; missed K-R@23	-0.00206838	2735.29	684.829	2735.29	684.829	4	9	1.1.1.2255.10	27.4102	1594.98	1523.36	27.42	0.51	478.655
tr|A0A498H9U4|A0A498H9U4_MALDO	14_3_3 domain-containing protein OS=Malus domestica OX=3750 GN=DVH24_028363 PE=3 SV=1	25.92	0	44.47	DNLTLWTSDITDDAGDEIKEASKR	Carbamyl(K)@23		missed K-E@19; missed K-R@23	-0.00206838	2735.29	684.829	2735.29	684.829	4	9	1.1.1.2255.10	27.4102	1594.98	1523.36	27.42	0.51	478.655
tr|A0A498H9U4|A0A498H9U4_MALDO	14_3_3 domain-containing protein OS=Malus domestica OX=3750 GN=DVH24_028363 PE=3 SV=1	25.92	0	42.48	DNLTLWTSDITDDAGDEIKEASKR	Carbamyl(R)@24		missed K-E@19; missed K-R@23	-0.00206838	2735.29	684.829	2735.29	684.829	4	9	1.1.1.2255.10	27.4102	1594.98	1523.36	27.42	0.51	478.655
tr|A0A498H9U4|A0A498H9U4_MALDO	14_3_3 domain-containing protein OS=Malus domestica OX=3750 GN=DVH24_028363 PE=3 SV=1	25.92	0	28.65	DNLTLWTSDITDDAGDEIKEASKR	Deamidated(N)@2		missed K-E@19; missed K-R@23	0.020541	2693.29	539.665	2693.27	539.661	5	7	1.1.1.2193.3	25.9211	2448.98	2168.66	25.96	0.21	944.584
tr|A0A498H9U4|A0A498H9U4_MALDO	14_3_3 domain-containing protein OS=Malus domestica OX=3750 GN=DVH24_028363 PE=3 SV=1	25.92	0	17.98	DNLTLWTSDITDDAGDEIKEASKR	Arg-loss@C-term		missed K-E@19; missed K-R@23	-0.00282105	2536.18	846.4	2536.18	846.401	3	8	1.1.1.2158.10	25.0938	2231.5	1185.51	24.91	0.36	310.716
tr|A0A498H9U4|A0A498H9U4_MALDO	14_3_3 domain-containing protein OS=Malus domestica OX=3750 GN=DVH24_028363 PE=3 SV=1	25.92	0	99	DSTLIMQLLR	Oxidation(M)@6			-0.00167281	1204.65	603.331	1204.65	603.332	2	16	1.1.1.2241.6	27.0653	73630.3	57831.4	27.25	0.56	7122.04
tr|A0A498H9U4|A0A498H9U4_MALDO	14_3_3 domain-containing protein OS=Malus domestica OX=3750 GN=DVH24_028363 PE=3 SV=1	25.92	0	99	DSTLIMQLLR	Oxidation(M)@6			-0.00167281	1204.65	603.331	1204.65	603.332	2	16	1.1.1.2262.8	27.5797	73630.3	29251	27.25	0.56	3733.16
tr|A0A498H9U4|A0A498H9U4_MALDO	14_3_3 domain-containing protein OS=Malus domestica OX=3750 GN=DVH24_028363 PE=3 SV=1	25.92	0	99	DSTLIMQLLR	Oxidation(M)@6			0.000402401	1204.65	603.332	1204.65	603.332	2	15	1.1.1.2305.2	28.6003	2523.89	2046.65	28.81	0.91	317.212
tr|A0A498H9U4|A0A498H9U4_MALDO	14_3_3 domain-containing protein OS=Malus domestica OX=3750 GN=DVH24_028363 PE=3 SV=1	25.92	0	99	DSTLIMQLLR				-0.00104382	1188.65	595.334	1188.65	595.334	2	17	1.1.1.2336.7	29.3331	170339	108982	29.11	0.38	13229.1
tr|A0A498H9U4|A0A498H9U4_MALDO	14_3_3 domain-containing protein OS=Malus domestica OX=3750 GN=DVH24_028363 PE=3 SV=1	25.92	0	91.01	DSTLIMQLLR	Dioxidation(M)@6	Dioxidation(M)@313		0.00136086	1220.64	611.33	1220.64	611.329	2	12	1.1.1.2286.3	28.1607	2114.7	1048.37	27.96	0.46	295.654
tr|A0A498H9U4|A0A498H9U4_MALDO	14_3_3 domain-containing protein OS=Malus domestica OX=3750 GN=DVH24_028363 PE=3 SV=1	25.92	0	87.43	DSTLIMQLLR				-0.00104382	1188.65	595.334	1188.65	595.334	2	11	1.1.1.2357.2	29.834	170339	2239.91	29.11	0.38	393.246
tr|A0A498H9U4|A0A498H9U4_MALDO	14_3_3 domain-containing protein OS=Malus domestica OX=3750 GN=DVH24_028363 PE=3 SV=1	25.92	0	84.92	DSTLIMQLLR	Oxidation(M)@6			-0.00203903	1204.65	603.331	1204.65	603.332	2	10	1.1.1.2328.8	29.1436	1895.62	1331.79	28.97	0.4	322.28
tr|A0A498H9U4|A0A498H9U4_MALDO	14_3_3 domain-containing protein OS=Malus domestica OX=3750 GN=DVH24_028363 PE=3 SV=1	25.92	0	81.05	DSTLIMQLLR	Carbamyl(M)@6			-0.00170568	1231.66	616.836	1231.66	616.837	2	13	1.1.1.2264.3	27.6246	4219.73	4143.16	27.62	0.41	667.366
tr|A0A498H9U4|A0A498H9U4_MALDO	14_3_3 domain-containing protein OS=Malus domestica OX=3750 GN=DVH24_028363 PE=3 SV=1	25.92	0	78.46	DSTLIMQLLR	Oxidation(M)@6			0.000402401	1204.65	603.332	1204.65	603.332	2	9	1.1.1.2283.8	28.0909	2523.89	1717.82	28.81	0.91	365.359
tr|A0A498H9U4|A0A498H9U4_MALDO	14_3_3 domain-containing protein OS=Malus domestica OX=3750 GN=DVH24_028363 PE=3 SV=1	25.92	0	99	EAAESTLLAYK				-0.00161572	1194.61	598.313	1194.61	598.314	2	19	1.1.1.1860.4	18.1105	617534	57252.8	17.68	0.3	5349.38
tr|A0A498H9U4|A0A498H9U4_MALDO	14_3_3 domain-containing protein OS=Malus domestica OX=3750 GN=DVH24_028363 PE=3 SV=1	25.92	0	94.69	EAAESTLLAYK				-0.00161572	1194.61	598.313	1194.61	598.314	2	12	1.1.1.1882.4	18.6168	617534	2421.06	17.68	0.3	483.814
tr|A0A498H9U4|A0A498H9U4_MALDO	14_3_3 domain-containing protein OS=Malus domestica OX=3750 GN=DVH24_028363 PE=3 SV=1	25.92	0	93.47	EAAESTLLAYK	Glu->pyro-Glu@N-term			0.00153283	1176.6	589.309	1176.6	589.309	2	11	1.1.1.2009.7	21.6079	24381.1	2315.72	21.31	0.29	516.437
tr|A0A498H9U4|A0A498H9U4_MALDO	14_3_3 domain-containing protein OS=Malus domestica OX=3750 GN=DVH24_028363 PE=3 SV=1	25.92	0	89.49	EAAESTLLAYK				-0.00161572	1194.61	598.313	1194.61	598.314	2	18	1.1.1.1838.9	17.6013	617534	426585	17.68	0.3	38014.3
tr|A0A498H9U4|A0A498H9U4_MALDO	14_3_3 domain-containing protein OS=Malus domestica OX=3750 GN=DVH24_028363 PE=3 SV=1	25.92	0	88.88	EAAESTLLAYK				-0.00344679	1194.61	598.312	1194.61	598.314	2	10	1.1.1.1905.3	19.1478	1881.42	1697.25	19.09	0.47	437.358
tr|A0A498H9U4|A0A498H9U4_MALDO	14_3_3 domain-containing protein OS=Malus domestica OX=3750 GN=DVH24_028363 PE=3 SV=1	25.92	0	80.24	EAAESTLLAYK				-0.00161572	1194.61	598.313	1194.61	598.314	2	10	1.1.1.1832.4	17.4585	617534	14230.5	17.68	0.3	659.46
tr|A0A498H9U4|A0A498H9U4_MALDO	14_3_3 domain-containing protein OS=Malus domestica OX=3750 GN=DVH24_028363 PE=3 SV=1	25.92	0	66.81	EAAESTLLAYK	Delta:H(4)C(2)@N-term			-0.00279542	1222.64	612.328	1222.64	612.33	2	10	1.1.1.2026.3	22.0072	65866.9	1228.14	21.72	0.17	457.977
tr|A0A498H9U4|A0A498H9U4_MALDO	14_3_3 domain-containing protein OS=Malus domestica OX=3750 GN=DVH24_028363 PE=3 SV=1	25.92	0	64.49	EAAESTLLAYK	Delta:H(4)C(2)@N-term			-0.00279542	1222.64	612.328	1222.64	612.33	2	9	1.1.1.2004.5	21.4872	65866.9	2497.42	21.72	0.17	496.447
tr|A0A498H9U4|A0A498H9U4_MALDO	14_3_3 domain-containing protein OS=Malus domestica OX=3750 GN=DVH24_028363 PE=3 SV=1	25.92	0	55.92	EAAESTLLAYK				-0.00955038	1194.6	598.309	1194.61	598.314	2	7	1.1.1.1948.9	20.165	1428.18	834.69	20.42	0.67	301.34
tr|A0A498H9U4|A0A498H9U4_MALDO	14_3_3 domain-containing protein OS=Malus domestica OX=3750 GN=DVH24_028363 PE=3 SV=1	25.92	0	43.78	EAAESTLLAYK				0.000947791	1194.61	598.314	1194.61	598.314	2	6	1.1.1.1927.9	19.6626	122.948	122.948			384.1
tr|A0A498H9U4|A0A498H9U4_MALDO	14_3_3 domain-containing protein OS=Malus domestica OX=3750 GN=DVH24_028363 PE=3 SV=1	25.92	0	99	EENVYMAK	Glu->pyro-Glu@N-term			0.000614634	964.433	483.224	964.432	483.223	2	11	1.1.1.1717.4	14.7723	6707.97	3958.53	15	0.44	1319.74
tr|A0A498H9U4|A0A498H9U4_MALDO	14_3_3 domain-containing protein OS=Malus domestica OX=3750 GN=DVH24_028363 PE=3 SV=1	25.92	0	21.56	GERKEAAESTLLAYK	Dioxidation(R)@3	Dioxidation(R)@233	cleaved G-G@N-term; missed R-K@3; missed K-E@4	0.0485871	1696.91	849.463	1696.86	849.439	2	9	1.1.1.1845.7	17.7658	4980.93	1388.05	17.93	0.21	368.419
tr|A0A498H9U4|A0A498H9U4_MALDO	14_3_3 domain-containing protein OS=Malus domestica OX=3750 GN=DVH24_028363 PE=3 SV=1	25.92	0	78.6	GNEDHVAIIKEYR	Carbamyl(K)@10		missed K-E@10	-0.00230059	1585.78	793.899	1585.78	793.9	2	10	1.1.1.1809.7	16.9248	4061.59	2236.65	17.01	0.19	234.802
tr|A0A498H9U4|A0A498H9U4_MALDO	14_3_3 domain-containing protein OS=Malus domestica OX=3750 GN=DVH24_028363 PE=3 SV=1	25.92	0	93.17	ICDGILNLLESHLIPSASSAESK	Carbamidomethyl(C)@2			-0.000182354	2453.25	818.756	2453.25	818.756	3	29	1.1.1.2368.7	30.1	294648	289479	30.11	0.07	70067.3
tr|A0A498H9U4|A0A498H9U4_MALDO	14_3_3 domain-containing protein OS=Malus domestica OX=3750 GN=DVH24_028363 PE=3 SV=1	25.92	0	72.13	ICDGILNLLESHLIPSASSAESK	Carbamidomethyl(C)@2; Delta:H(4)C(2)(K)@23			-0.00709935	2481.27	828.098	2481.28	828.1	3	12	1.1.1.2368.8	30.1009	20604	15530.1	30.12	0.07	1073.17
tr|A0A498H9U4|A0A498H9U4_MALDO	14_3_3 domain-containing protein OS=Malus domestica OX=3750 GN=DVH24_028363 PE=3 SV=1	25.92	0	45.17	ICDGILNLLESHLIPSASSAESK	Carbamidomethyl(C)@2; Dimethyl(K)@23	Dimethyl(K)@210		-0.00709935	2481.27	828.098	2481.28	828.1	3	12	1.1.1.2368.8	30.1009	20604	15530.1	30.12	0.07	1073.17
tr|A0A498H9U4|A0A498H9U4_MALDO	14_3_3 domain-containing protein OS=Malus domestica OX=3750 GN=DVH24_028363 PE=3 SV=1	25.92	0	44.47	ICDGILNLLESHLIPSASSAESK	Carbamidomethyl(C)@2; Carbamidomethyl(E)@10			-0.00186134	2510.27	837.763	2510.27	837.763	3	10	1.1.1.2359.2	29.8885	13467.1	1673.77	30.05	0.07	278.38
tr|A0A498H9U4|A0A498H9U4_MALDO	14_3_3 domain-containing protein OS=Malus domestica OX=3750 GN=DVH24_028363 PE=3 SV=1	25.92	0	41.85	ICDGILNLLESHLIPSASSAESK	Carbamidomethyl(C)@2; Carbamidomethyl(S)@11			-0.00186134	2510.27	837.763	2510.27	837.763	3	10	1.1.1.2359.2	29.8885	13467.1	1673.77	30.05	0.07	278.38
tr|A0A498H9U4|A0A498H9U4_MALDO	14_3_3 domain-containing protein OS=Malus domestica OX=3750 GN=DVH24_028363 PE=3 SV=1	25.92	0	41.85	ICDGILNLLESHLIPSASSAESK	Carbamidomethyl(C)@2; Carbamidomethyl(H)@12			-0.00186134	2510.27	837.763	2510.27	837.763	3	10	1.1.1.2359.2	29.8885	13467.1	1673.77	30.05	0.07	278.38
tr|A0A498H9U4|A0A498H9U4_MALDO	14_3_3 domain-containing protein OS=Malus domestica OX=3750 GN=DVH24_028363 PE=3 SV=1	25.92	0	25.49	ICDGILNLLESHLIPSASSAESK	Carbamidomethyl(C)@2; Methyl(D)@3; Deamidated(N)@7	Methyl(D)@190		0.00872165	2468.26	823.759	2468.25	823.756	3	9	1.1.1.2367.14	30.0825	7692.85	6834.52	30.09	0.07	945.483
tr|A0A498H9U4|A0A498H9U4_MALDO	14_3_3 domain-containing protein OS=Malus domestica OX=3750 GN=DVH24_028363 PE=3 SV=1	25.92	0	17.82	ICDGILNLLESHLIPSASSAESK	Carbamidomethyl(C)@2; Formyl(K)@23			0.0292862	2481.27	828.098	2481.24	828.088	3	12	1.1.1.2368.8	30.1009	20604	15530.1	30.12	0.07	1073.17
tr|A0A498H9U4|A0A498H9U4_MALDO	14_3_3 domain-containing protein OS=Malus domestica OX=3750 GN=DVH24_028363 PE=3 SV=1	25.92	0	98.16	IISSIEQKEESR	Carbamyl(K)@8		missed K-E@8	-0.000263998	1460.75	731.381	1460.75	731.381	2	14	1.1.1.1733.7	15.1512	4316.3	1590.79	15.3	0.19	214.842
tr|A0A498H9U4|A0A498H9U4_MALDO	14_3_3 domain-containing protein OS=Malus domestica OX=3750 GN=DVH24_028363 PE=3 SV=1	25.92	0	93.76	IISSIEQKEESR			missed K-E@8	0.00289755	1417.74	473.589	1417.74	473.588	3	11	1.1.1.1617.3	12.4367	10859.1	10443.7	12.45	0.21	1359.2
tr|A0A498H9U4|A0A498H9U4_MALDO	14_3_3 domain-containing protein OS=Malus domestica OX=3750 GN=DVH24_028363 PE=3 SV=1	25.92	0	99	KEAAESTLLAYK			missed K-E@1	0.00228605	1322.71	441.911	1322.71	441.91	3	16	1.1.1.1764.3	15.8598	174092	75748.4	15.72	0.23	9147.43
tr|A0A498H9U4|A0A498H9U4_MALDO	14_3_3 domain-containing protein OS=Malus domestica OX=3750 GN=DVH24_028363 PE=3 SV=1	25.92	0	99	KEAAESTLLAYK			missed K-E@1	0.00334289	1322.71	662.363	1322.71	662.361	2	15	1.1.1.1772.8	16.0541	138287	2689.67	15.69	0.23	395.925
tr|A0A498H9U4|A0A498H9U4_MALDO	14_3_3 domain-containing protein OS=Malus domestica OX=3750 GN=DVH24_028363 PE=3 SV=1	25.92	0	99	KEAAESTLLAYK			missed K-E@1	0.00228605	1322.71	441.911	1322.71	441.91	3	12	1.1.1.1789.2	16.4537	174092	723.88	15.72	0.23	561.197
tr|A0A498H9U4|A0A498H9U4_MALDO	14_3_3 domain-containing protein OS=Malus domestica OX=3750 GN=DVH24_028363 PE=3 SV=1	25.92	0	99	KEAAESTLLAYK	Delta:H(4)C(2)@N-term		missed K-E@1	0.000611562	1350.74	676.377	1350.74	676.377	2	13	1.1.1.1824.8	17.2722	25321.5	2356.28	17.43	0.18	435.007
tr|A0A498H9U4|A0A498H9U4_MALDO	14_3_3 domain-containing protein OS=Malus domestica OX=3750 GN=DVH24_028363 PE=3 SV=1	25.92	0	99	KEAAESTLLAYK	Delta:H(4)C(2)(K)@1		missed K-E@1	0.000611562	1350.74	676.377	1350.74	676.377	2	13	1.1.1.1824.8	17.2722	25321.5	2356.28	17.43	0.18	435.007
tr|A0A498H9U4|A0A498H9U4_MALDO	14_3_3 domain-containing protein OS=Malus domestica OX=3750 GN=DVH24_028363 PE=3 SV=1	25.92	0	99	KEAAESTLLAYK	Methyl(E)@5; Methyl(S)@6	Methyl(E)@238; Methyl(S)@239	missed K-E@1	0.00219383	1350.74	676.378	1350.74	676.377	2	17	1.1.1.1907.7	19.1993	9202.7	8371.93	19.16	0.16	1077.25
tr|A0A498H9U4|A0A498H9U4_MALDO	14_3_3 domain-containing protein OS=Malus domestica OX=3750 GN=DVH24_028363 PE=3 SV=1	25.92	0	94.01	KEAAESTLLAYK	Carbamyl@N-term		missed K-E@1	0.000278309	1365.71	683.864	1365.71	683.864	2	13	1.1.1.1869.11	18.3158	16533.4	5942.4	18.45	0.26	990.601
tr|A0A498H9U4|A0A498H9U4_MALDO	14_3_3 domain-containing protein OS=Malus domestica OX=3750 GN=DVH24_028363 PE=3 SV=1	25.92	0	90.37	KEAAESTLLAYK			missed K-E@1	0.00228605	1322.71	441.911	1322.71	441.91	3	15	1.1.1.1762.3	15.8131	174092	121354	15.72	0.23	11525
tr|A0A498H9U4|A0A498H9U4_MALDO	14_3_3 domain-containing protein OS=Malus domestica OX=3750 GN=DVH24_028363 PE=3 SV=1	25.92	0	63.76	KEAAESTLLAYK	Carbamidomethyl@N-term		missed K-E@1	0.00153214	1379.73	460.918	1379.73	460.917	3	10	1.1.1.1760.2	15.7654	3131.77	2325.85	15.69	0.23	719.741
tr|A0A498H9U4|A0A498H9U4_MALDO	14_3_3 domain-containing protein OS=Malus domestica OX=3750 GN=DVH24_028363 PE=3 SV=1	25.92	0	18.9	KEAAESTLLAYK	Dimethyl(K)@1	Dimethyl(K)@234	missed K-E@1	0.000611562	1350.74	676.377	1350.74	676.377	2	13	1.1.1.1824.8	17.2722	25321.5	2356.28	17.43	0.18	435.007
tr|A0A498H9U4|A0A498H9U4_MALDO	14_3_3 domain-containing protein OS=Malus domestica OX=3750 GN=DVH24_028363 PE=3 SV=1	25.92	0	99	LAEQAERYEEMVEFMEK	Oxidation(M)@11; Oxidation(M)@15		missed R-Y@7	-0.00235962	2162.95	721.99	2162.95	721.991	3	19	1.1.1.1891.8	18.8272	124188	10136.8	18.49	0.19	729.117
tr|A0A498H9U4|A0A498H9U4_MALDO	14_3_3 domain-containing protein OS=Malus domestica OX=3750 GN=DVH24_028363 PE=3 SV=1	25.92	0	84.92	LAEQAERYEEMVEFMEK			missed R-Y@7	0.00142518	2130.96	711.328	2130.96	711.327	3	12	1.1.1.2175.11	25.497	110145	5050.87	25.13	0.28	790.295
tr|A0A498H9U4|A0A498H9U4_MALDO	14_3_3 domain-containing protein OS=Malus domestica OX=3750 GN=DVH24_028363 PE=3 SV=1	25.92	0	81.48	LAEQAERYEEMVEFMEK	Oxidation(M)@15		missed R-Y@7	-0.000994103	2146.95	716.659	2146.96	716.659	3	15	1.1.1.1995.15	21.2808	50376.4	21174.2	21.17	0.22	6816.49
tr|A0A498H9U4|A0A498H9U4_MALDO	14_3_3 domain-containing protein OS=Malus domestica OX=3750 GN=DVH24_028363 PE=3 SV=1	25.92	0	78.51	LAEQAERYEEMVEFMEK	Dimethyl(R)@7; Oxidation(M)@11; Oxidation(M)@15	Dimethyl(R)@109	missed R-Y@7	-0.00278721	2190.98	731.333	2190.98	731.334	3	11	1.1.1.1938.14	19.9299	4590.97	3880.94	20.04	0.38	851.295
tr|A0A498H9U4|A0A498H9U4_MALDO	14_3_3 domain-containing protein OS=Malus domestica OX=3750 GN=DVH24_028363 PE=3 SV=1	25.92	0	63.31	LAEQAERYEEMVEFMEK	Oxidation(M)@11; Oxidation(M)@15		missed R-Y@7	-0.00272584	2162.95	721.99	2162.95	721.991	3	9	1.1.1.1913.5	19.3359	3654.22	2258.62	19.26	0.35	526.713
tr|A0A498H9U4|A0A498H9U4_MALDO	14_3_3 domain-containing protein OS=Malus domestica OX=3750 GN=DVH24_028363 PE=3 SV=1	25.92	0	62.71	LAEQAERYEEMVEFMEK	Oxidation(M)@11; Carbamyl(K)@17		missed R-Y@7	0.000266986	2189.96	730.994	2189.96	730.994	3	9	1.1.1.1896.9	18.9453	5052.41	4019.9	18.98	0.14	434.057
tr|A0A498H9U4|A0A498H9U4_MALDO	14_3_3 domain-containing protein OS=Malus domestica OX=3750 GN=DVH24_028363 PE=3 SV=1	25.92	0	55.76	LAEQAERYEEMVEFMEK			missed R-Y@7	0.00150292	2130.96	533.748	2130.96	533.747	4	6	1.1.1.2150.4	24.9128	4212.34	392.12	25.2	0.26	225.775
tr|A0A498H9U4|A0A498H9U4_MALDO	14_3_3 domain-containing protein OS=Malus domestica OX=3750 GN=DVH24_028363 PE=3 SV=1	25.92	0	44.47	LAEQAERYEEMVEFMEK			missed R-Y@7	0.00142518	2130.96	711.328	2130.96	711.327	3	6	1.1.1.2147.5	24.8423	110145	2273.29	25.13	0.28	415.735
tr|A0A498H9U4|A0A498H9U4_MALDO	14_3_3 domain-containing protein OS=Malus domestica OX=3750 GN=DVH24_028363 PE=3 SV=1	25.92	0	36.96	LAEQAERYEEMVEFMEK	Oxidation(M)@11; Carbamyl(M)@15		missed R-Y@7	0.000266986	2189.96	730.994	2189.96	730.994	3	10	1.1.1.1896.9	18.9453	5052.41	4019.9	18.98	0.14	434.057
tr|A0A498H9U4|A0A498H9U4_MALDO	14_3_3 domain-containing protein OS=Malus domestica OX=3750 GN=DVH24_028363 PE=3 SV=1	25.92	0	15.17	LAYKSAQDIALAELAPTHPIR	HexNAc(S)@5	HexNAc(S)@246	cleaved L-L@N-term; missed K-S@4	0.0467503	2480.37	827.799	2480.33	827.783	3	10	1.1.1.2019.11	21.8547	4215.4	3893.38	21.88	0.12	1000.49
tr|A0A498H9U4|A0A498H9U4_MALDO	14_3_3 domain-containing protein OS=Malus domestica OX=3750 GN=DVH24_028363 PE=3 SV=1	25.92	0	84.55	NLLSVAYK	Deamidated(N)@1			4.64876e-05	907.502	454.758	907.501	454.758	2	11	1.1.1.2005.2	21.5087	16551.2	13029.1	21.58	0.26	2256.61
tr|A0A498H9U4|A0A498H9U4_MALDO	14_3_3 domain-containing protein OS=Malus domestica OX=3750 GN=DVH24_028363 PE=3 SV=1	25.92	0	77.15	NLLSVAYK				0.00468145	906.522	454.268	906.517	454.266	2	9	1.1.1.1856.3	18.0073	1303.44	1131.71	17.98	0.35	518.936
tr|A0A498H9U4|A0A498H9U4_MALDO	14_3_3 domain-containing protein OS=Malus domestica OX=3750 GN=DVH24_028363 PE=3 SV=1	25.92	0	71.51	NLLSVAYK				-0.00178792	906.516	454.265	906.517	454.266	2	9	1.1.1.3357.2	38.1373	240.2	226.81	38.17	0.48	78.469
tr|A0A498H9U4|A0A498H9U4_MALDO	14_3_3 domain-containing protein OS=Malus domestica OX=3750 GN=DVH24_028363 PE=3 SV=1	25.92	0	55.76	NLLSVAYK				-0.00197103	906.516	454.265	906.517	454.266	2	8	1.1.1.3513.2	39.7172	280.32	209.32	40.2	0.69	121.099
tr|A0A498H9U4|A0A498H9U4_MALDO	14_3_3 domain-containing protein OS=Malus domestica OX=3750 GN=DVH24_028363 PE=3 SV=1	25.92	0	46.61	NLLSVAYK				-0.0113705	906.506	454.26	906.517	454.266	2	7	1.1.1.2148.2	24.8635	1161.28	667.92	24.46	0.54	450.219
tr|A0A498H9U4|A0A498H9U4_MALDO	14_3_3 domain-containing protein OS=Malus domestica OX=3750 GN=DVH24_028363 PE=3 SV=1	25.92	0	46.61	NLLSVAYK				-0.00197103	906.516	454.265	906.517	454.266	2	6	1.1.1.3578.2	40.2275	280.32	274.06	40.2	0.69	120.649
tr|A0A498H9U4|A0A498H9U4_MALDO	14_3_3 domain-containing protein OS=Malus domestica OX=3750 GN=DVH24_028363 PE=3 SV=1	25.92	0	42.48	NLLSVAYK				-0.00215414	906.515	454.265	906.517	454.266	2	6	1.1.1.2197.3	26.0175	504.38	471.86	26.01	0.19	344.849
tr|A0A498H9U4|A0A498H9U4_MALDO	14_3_3 domain-containing protein OS=Malus domestica OX=3750 GN=DVH24_028363 PE=3 SV=1	25.92	0	38.79	NLLSVAYK				-0.000506596	906.517	454.266	906.517	454.266	2	10	1.1.1.1924.2	19.5863	18072.2	16034.1	19.72	0.45	4584
tr|A0A498H9U4|A0A498H9U4_MALDO	14_3_3 domain-containing protein OS=Malus domestica OX=3750 GN=DVH24_028363 PE=3 SV=1	25.92	0	31.15	NLLSVAYK				0.00266727	906.52	454.267	906.517	454.266	2	13	1.1.1.1902.2	19.0744	852621	159208	18.82	0.42	32694.1
tr|A0A498H9U4|A0A498H9U4_MALDO	14_3_3 domain-containing protein OS=Malus domestica OX=3750 GN=DVH24_028363 PE=3 SV=1	25.92	0	30.59	NLLSVAYK				-0.00331424	906.514	454.264	906.517	454.266	2	7	1.1.1.1984.5	21.0093	2305.82	1782.51	20.79	0.57	1284.42
tr|A0A498H9U4|A0A498H9U4_MALDO	14_3_3 domain-containing protein OS=Malus domestica OX=3750 GN=DVH24_028363 PE=3 SV=1	25.92	0	28.65	NLLSVAYK				-0.00276449	906.515	454.265	906.517	454.266	2	5	1.1.1.2170.2	25.3677	618.27	572.18	25.39	0.15	458.215
tr|A0A498H9U4|A0A498H9U4_MALDO	14_3_3 domain-containing protein OS=Malus domestica OX=3750 GN=DVH24_028363 PE=3 SV=1	25.92	0	88.66	NLLSVAYKNVIGAR	Deamidated(N)@9		missed K-N@8	-0.000948427	1517.86	759.935	1517.86	759.936	2	11	1.1.1.2191.5	25.879	4957.82	3721.79	26.01	0.38	255.542
tr|A0A498H9U4|A0A498H9U4_MALDO	14_3_3 domain-containing protein OS=Malus domestica OX=3750 GN=DVH24_028363 PE=3 SV=1	25.92	0	87.43	NLLSVAYKNVIGAR	Deamidated(N)@9		missed K-N@8	0.00120124	1517.86	506.96	1517.86	506.959	3	11	1.1.1.2202.3	26.1335	7191.66	3833.46	26.01	0.38	570.557
tr|A0A498H9U4|A0A498H9U4_MALDO	14_3_3 domain-containing protein OS=Malus domestica OX=3750 GN=DVH24_028363 PE=3 SV=1	25.92	0	87.43	NLLSVAYKNVIGAR	Deamidated(N)@1; Carbamyl(K)@8		missed K-N@8	0.00109901	1560.86	781.439	1560.86	781.438	2	13	1.1.1.2317.3	28.8839	1363.54	628.53	29.11	0.55	197.488
tr|A0A498H9U4|A0A498H9U4_MALDO	14_3_3 domain-containing protein OS=Malus domestica OX=3750 GN=DVH24_028363 PE=3 SV=1	25.92	0	82.67	NLLSVAYKNVIGAR	Carbamidomethyl(K)@8		missed K-N@8	-0.00320936	1573.89	525.638	1573.89	525.639	3	12	1.1.1.2134.3	24.5367	11374.2	9279.86	24.46	0.3	1522.16
tr|A0A498H9U4|A0A498H9U4_MALDO	14_3_3 domain-containing protein OS=Malus domestica OX=3750 GN=DVH24_028363 PE=3 SV=1	25.92	0	75.89	NLLSVAYKNVIGAR	Carbamyl(K)@8		missed K-N@8	0.000241775	1559.88	780.947	1559.88	780.946	2	10	1.1.1.2253.11	27.3621	27432.3	2299.29	27.55	0.15	380.052
tr|A0A498H9U4|A0A498H9U4_MALDO	14_3_3 domain-containing protein OS=Malus domestica OX=3750 GN=DVH24_028363 PE=3 SV=1	25.92	0	75.89	NLLSVAYKNVIGAR	Formyl(K)@8		missed K-N@8	0.00318329	1544.87	773.443	1544.87	773.441	2	9	1.1.1.2271.13	27.8032	1582.59	1556.62	27.79	0.39	281.349
tr|A0A498H9U4|A0A498H9U4_MALDO	14_3_3 domain-containing protein OS=Malus domestica OX=3750 GN=DVH24_028363 PE=3 SV=1	25.92	0	75.89	NLLSVAYKNVIGAR	Formyl(K)@8		missed K-N@8	0.00280425	1544.87	515.964	1544.87	515.963	3	10	1.1.1.2273.4	27.8441	1028.28	1000.81	27.81	0.37	407.339
tr|A0A498H9U4|A0A498H9U4_MALDO	14_3_3 domain-containing protein OS=Malus domestica OX=3750 GN=DVH24_028363 PE=3 SV=1	25.92	0	34.75	NLLSVAYKNVIGAR	Deamidated(N)@9		missed K-N@8	-0.000948427	1517.86	759.935	1517.86	759.936	2	6	1.1.1.2184.10	25.7141	4957.82	1727.99	26.01	0.38	331.775
tr|A0A498H9U4|A0A498H9U4_MALDO	14_3_3 domain-containing protein OS=Malus domestica OX=3750 GN=DVH24_028363 PE=3 SV=1	25.92	0	72.13	QAFDEAISELDTLGEESYK				0.000265384	2143.98	715.667	2143.98	715.667	3	8	1.1.1.2305.5	28.6053	35808.8	976.04	27.98	0.27	172.082
tr|A0A498H9U4|A0A498H9U4_MALDO	14_3_3 domain-containing protein OS=Malus domestica OX=3750 GN=DVH24_028363 PE=3 SV=1	25.92	0	21.72	QAFDEAISELDTLGEESYK	Methyl(E)@15; Methyl(E)@16	Methyl(E)@303; Methyl(E)@304		0.00103078	2172.01	725.011	2172.01	725.011	3	8	1.1.1.2341.10	29.4535	5808.21	3689.65	29.3	0.48	433.477
tr|A0A498H9U4|A0A498H9U4_MALDO	14_3_3 domain-containing protein OS=Malus domestica OX=3750 GN=DVH24_028363 PE=3 SV=1	25.92	0	99	SAQDIALAELAPTHPIR				0.000635166	1801.97	601.664	1801.97	601.664	3	21	1.1.1.2037.7	22.2655	781224	30509.8	22	0.23	2888.61
tr|A0A498H9U4|A0A498H9U4_MALDO	14_3_3 domain-containing protein OS=Malus domestica OX=3750 GN=DVH24_028363 PE=3 SV=1	25.92	0	79.11	SAQDIALAELAPTHPIR				-0.00318587	1801.97	601.662	1801.97	601.664	3	10	1.1.1.3369.3	38.3092	753.44	566.44	38.34	0.1	81.1241
tr|A0A498H9U4|A0A498H9U4_MALDO	14_3_3 domain-containing protein OS=Malus domestica OX=3750 GN=DVH24_028363 PE=3 SV=1	25.92	0	69.05	SAQDIALAELAPTHPIR				0.000635166	1801.97	601.664	1801.97	601.664	3	25	1.1.1.2026.2	22.0047	781224	768705	22	0.23	127730
tr|A0A498H9U4|A0A498H9U4_MALDO	14_3_3 domain-containing protein OS=Malus domestica OX=3750 GN=DVH24_028363 PE=3 SV=1	25.92	0	40.02	SAQDIALAELAPTHPIR				-2.85576e-05	1801.97	451.499	1801.97	451.499	4	7	1.1.1.2016.2	21.7692	81497.4	3825.37	21.98	0.23	364.31
tr|A0A498H9U4|A0A498H9U4_MALDO	14_3_3 domain-containing protein OS=Malus domestica OX=3750 GN=DVH24_028363 PE=3 SV=1	25.92	0	38.79	SAQDIALAELAPTHPIR				0.000635166	1801.97	601.664	1801.97	601.664	3	8	1.1.1.2046.3	22.4769	781224	9165.22	22	0.23	480.652
tr|A0A498H9U4|A0A498H9U4_MALDO	14_3_3 domain-containing protein OS=Malus domestica OX=3750 GN=DVH24_028363 PE=3 SV=1	25.92	0	25.34	SAQDIALAELAPTHPIR	HNE(L)@10; Dioxidation(P)@12	HNE(L)@255; Dioxidation(P)@257		-0.000439423	1990.07	664.365	1990.07	664.365	3	13	1.1.1.2018.8	21.8221	4316.88	1874.15	21.91	0.23	2743.13
tr|A0A498H9U4|A0A498H9U4_MALDO	14_3_3 domain-containing protein OS=Malus domestica OX=3750 GN=DVH24_028363 PE=3 SV=1	25.92	0	45.35	SKIEAELSK	Carbamyl@N-term		missed K-I@2	0.00169918	1046.56	524.288	1046.56	524.288	2	9	1.1.1.1704.5	14.4704	12655.6	11112.4	14.44	0.14	1055.03
tr|A0A498H9U4|A0A498H9U4_MALDO	14_3_3 domain-containing protein OS=Malus domestica OX=3750 GN=DVH24_028363 PE=3 SV=1	25.92	0	33.11	SKIEAELSK			missed K-I@2	0.000853718	1003.56	502.785	1003.55	502.785	2	8	1.1.1.1569.2	11.309	2078.92	2068.78	11.33	0.16	350.147
tr|A0A498H9U4|A0A498H9U4_MALDO	14_3_3 domain-containing protein OS=Malus domestica OX=3750 GN=DVH24_028363 PE=3 SV=1	25.92	0	99	TVDVEELTVEER				0.000762173	1417.69	709.855	1417.69	709.854	2	21	1.1.1.1920.5	19.4992	1127386	593376	19.35	0.3	49968.1
tr|A0A498H9U4|A0A498H9U4_MALDO	14_3_3 domain-containing protein OS=Malus domestica OX=3750 GN=DVH24_028363 PE=3 SV=1	25.92	0	99	TVDVEELTVEER				0.000762173	1417.69	709.855	1417.69	709.854	2	19	1.1.1.1942.12	20.0246	1127386	34133.6	19.35	0.3	3558.03
tr|A0A498H9U4|A0A498H9U4_MALDO	14_3_3 domain-containing protein OS=Malus domestica OX=3750 GN=DVH24_028363 PE=3 SV=1	25.92	0	99	TVDVEELTVEER				0.000762173	1417.69	709.855	1417.69	709.854	2	16	1.1.1.1964.8	20.5413	1127386	8092.35	19.35	0.3	1157.53
tr|A0A498H9U4|A0A498H9U4_MALDO	14_3_3 domain-containing protein OS=Malus domestica OX=3750 GN=DVH24_028363 PE=3 SV=1	25.92	0	99	TVDVEELTVEER				0.00112839	1417.69	709.855	1417.69	709.854	2	14	1.1.1.2007.13	21.5655	2981.59	2582.8	21.72	0.45	411.387
tr|A0A498H9U4|A0A498H9U4_MALDO	14_3_3 domain-containing protein OS=Malus domestica OX=3750 GN=DVH24_028363 PE=3 SV=1	25.92	0	99	TVDVEELTVEER				0.0036919	1417.7	709.856	1417.69	709.854	2	15	1.1.1.2030.4	22.1031	2688.58	1904.47	22	0.26	593.692
tr|A0A498H9U4|A0A498H9U4_MALDO	14_3_3 domain-containing protein OS=Malus domestica OX=3750 GN=DVH24_028363 PE=3 SV=1	25.92	0	99	TVDVEELTVEER	Methyl(E)@5; Methyl(E)@6	Methyl(E)@127; Methyl(E)@128		-0.000643393	1445.72	723.869	1445.72	723.87	2	18	1.1.1.2041.5	22.3638	54199.9	8012.27	22.21	0.16	913.39
tr|A0A498H9U4|A0A498H9U4_MALDO	14_3_3 domain-containing protein OS=Malus domestica OX=3750 GN=DVH24_028363 PE=3 SV=1	25.92	0	99	TVDVEELTVEER	Dimethyl(R)@12	Dimethyl(R)@134		0.000699397	1445.73	723.87	1445.72	723.87	2	17	1.1.1.2063.5	22.8758	10038.4	9197.83	22.93	0.37	1102.25
tr|A0A498H9U4|A0A498H9U4_MALDO	14_3_3 domain-containing protein OS=Malus domestica OX=3750 GN=DVH24_028363 PE=3 SV=1	25.92	0	94.69	TVDVEELTVEER				0.000762173	1417.69	709.855	1417.69	709.854	2	14	1.1.1.1948.16	20.1708	1127386	22900.6	19.35	0.3	1390.48
tr|A0A498H9U4|A0A498H9U4_MALDO	14_3_3 domain-containing protein OS=Malus domestica OX=3750 GN=DVH24_028363 PE=3 SV=1	25.92	0	93.88	TVDVEELTVEER				-0.00228962	1417.69	709.853	1417.69	709.854	2	11	1.1.1.2053.5	22.6396	1586.94	1259.37	22.7	0.51	403.272
tr|A0A498H9U4|A0A498H9U4_MALDO	14_3_3 domain-containing protein OS=Malus domestica OX=3750 GN=DVH24_028363 PE=3 SV=1	25.92	0	90.09	TVDVEELTVEER				0.000762173	1417.69	709.855	1417.69	709.854	2	10	1.1.1.1898.6	18.9865	1127386	733.74	19.35	0.3	217.96
tr|A0A498H9U4|A0A498H9U4_MALDO	14_3_3 domain-containing protein OS=Malus domestica OX=3750 GN=DVH24_028363 PE=3 SV=1	25.92	0	90.09	TVDVEELTVEER	Carbamidomethyl(E)@5			-0.00020485	1474.71	738.365	1474.72	738.365	2	11	1.1.1.1904.4	19.1243	3099.5	931.65	19.42	0.35	393.476
tr|A0A498H9U4|A0A498H9U4_MALDO	14_3_3 domain-containing protein OS=Malus domestica OX=3750 GN=DVH24_028363 PE=3 SV=1	25.92	0	88.88	TVDVEELTVEER				-0.000946833	1417.69	709.854	1417.69	709.854	2	10	1.1.1.2075.10	23.1522	1614.05	1014.79	23.07	0.58	477.656
tr|A0A498H9U4|A0A498H9U4_MALDO	14_3_3 domain-containing protein OS=Malus domestica OX=3750 GN=DVH24_028363 PE=3 SV=1	25.92	0	87.3	TVDVEELTVEER	Methyl(E)@6; Methyl(L)@7	Methyl(E)@128; Methyl(L)@129		0.00192012	1445.73	723.871	1445.72	723.87	2	12	1.1.1.2019.9	21.8514	31615.4	2833.97	21.53	0.19	419.164
tr|A0A498H9U4|A0A498H9U4_MALDO	14_3_3 domain-containing protein OS=Malus domestica OX=3750 GN=DVH24_028363 PE=3 SV=1	25.92	0	86.64	TVDVEELTVEER	Cation:Na(E)@6			-0.00121839	1439.67	480.899	1439.68	480.899	3	11	1.1.1.1913.2	19.3309	4587.26	4270.97	19.37	0.35	723.019
tr|A0A498H9U4|A0A498H9U4_MALDO	14_3_3 domain-containing protein OS=Malus domestica OX=3750 GN=DVH24_028363 PE=3 SV=1	25.92	0	86.64	TVDVEELTVEER	Cation:Na(E)@5			-0.00121839	1439.67	480.899	1439.68	480.899	3	11	1.1.1.1913.2	19.3309	4587.26	4270.97	19.37	0.35	723.019
tr|A0A498H9U4|A0A498H9U4_MALDO	14_3_3 domain-containing protein OS=Malus domestica OX=3750 GN=DVH24_028363 PE=3 SV=1	25.92	0	78.51	TVDVEELTVEER				0.000762173	1417.69	709.855	1417.69	709.854	2	10	1.1.1.1937.9	19.9017	1127386	48263	19.35	0.3	696.802
tr|A0A498H9U4|A0A498H9U4_MALDO	14_3_3 domain-containing protein OS=Malus domestica OX=3750 GN=DVH24_028363 PE=3 SV=1	25.92	0	69.09	TVDVEELTVEER				-0.013175	1417.68	709.847	1417.69	709.854	2	6	1.1.1.2357.4	29.8357	780.37	295.52	29.33	0.45	111.38
tr|A0A498H9U4|A0A498H9U4_MALDO	14_3_3 domain-containing protein OS=Malus domestica OX=3750 GN=DVH24_028363 PE=3 SV=1	25.92	0	45.88	TVDVEELTVEER				-0.0245277	1417.67	709.842	1417.69	709.854	2	7	1.1.1.2305.4	28.6037	1455.11	688.83	28.43	0.58	213.912
tr|A0A498H9U4|A0A498H9U4_MALDO	14_3_3 domain-containing protein OS=Malus domestica OX=3750 GN=DVH24_028363 PE=3 SV=1	25.92	0	19.39	TVDVEELTVEER				0.00306873	1417.7	473.573	1417.69	473.572	3	7	1.1.1.1902.3	19.0761	123991	1572.05	19.35	0.33	540.956
tr|A0A498H9U4|A0A498H9U4_MALDO	14_3_3 domain-containing protein OS=Malus domestica OX=3750 GN=DVH24_028363 PE=3 SV=1	25.92	0	28.96	VFYLKMK	Carbamyl(K)@5		missed K-M@5	0.00282247	970.534	486.274	970.531	486.273	2	7	1.1.1.1983.4	20.9843	45658.7	3476.15	21.19	0.22	741.58
tr|A0A498H9U4|A0A498H9U4_MALDO	14_3_3 domain-containing protein OS=Malus domestica OX=3750 GN=DVH24_028363 PE=3 SV=1	25.92	0	20.05	VFYLKMK	Carbamyl(K)@5; Oxidation(M)@6		missed K-M@5	0.000282683	986.526	494.27	986.526	494.27	2	7	1.1.1.1821.4	17.2012	21020.4	2749.09	17.36	0.16	576.839
tr|A0A498H9U4|A0A498H9U4_MALDO	14_3_3 domain-containing protein OS=Malus domestica OX=3750 GN=DVH24_028363 PE=3 SV=1	25.92	0	99	YEEMVEFMEK	Oxidation(M)@4; Oxidation(M)@8			0.00050703	1365.55	683.781	1365.55	683.781	2	13	1.1.1.1723.6	14.9196	39364.9	1583.22	15.3	0.33	499.594
tr|A0A498H9U4|A0A498H9U4_MALDO	14_3_3 domain-containing protein OS=Malus domestica OX=3750 GN=DVH24_028363 PE=3 SV=1	25.92	0	99	YEEMVEFMEK	Oxidation(M)@4			0.00112196	1349.55	675.784	1349.55	675.783	2	15	1.1.1.1841.10	17.6726	14435	3373.26	18.1	0.63	496.777
tr|A0A498H9U4|A0A498H9U4_MALDO	14_3_3 domain-containing protein OS=Malus domestica OX=3750 GN=DVH24_028363 PE=3 SV=1	25.92	0	99	YEEMVEFMEK	Oxidation(M)@8			0.00112196	1349.55	675.784	1349.55	675.783	2	15	1.1.1.1863.7	18.1756	14435	12859.8	18.1	0.63	1602.6
tr|A0A498H9U4|A0A498H9U4_MALDO	14_3_3 domain-containing protein OS=Malus domestica OX=3750 GN=DVH24_028363 PE=3 SV=1	25.92	0	99	YEEMVEFMEK				-0.00208611	1333.55	667.785	1333.56	667.786	2	14	1.1.1.2028.3	22.0529	138544	7044.28	21.77	0.21	1174.45
tr|A0A498H9U4|A0A498H9U4_MALDO	14_3_3 domain-containing protein OS=Malus domestica OX=3750 GN=DVH24_028363 PE=3 SV=1	25.92	0	95.99	YEEMVEFMEK	Oxidation(M)@4; Oxidation(M)@8			0.000944702	1365.55	456.19	1365.55	456.19	3	10	1.1.1.1738.5	15.2589	2933.76	2534.08	15.32	0.26	850.779
tr|A0A498H9U4|A0A498H9U4_MALDO	14_3_3 domain-containing protein OS=Malus domestica OX=3750 GN=DVH24_028363 PE=3 SV=1	25.92	0	94.41	YEEMVEFMEK	Oxidation(M)@4; Oxidation(M)@8			0.00099532	1365.55	683.781	1365.55	683.781	2	11	1.1.1.1789.8	16.4662	1887.62	1094.29	16.23	0.29	336.934
tr|A0A498H9U4|A0A498H9U4_MALDO	14_3_3 domain-containing protein OS=Malus domestica OX=3750 GN=DVH24_028363 PE=3 SV=1	25.92	0	94.01	YEEMVEFMEK	Delta:H(4)C(2)@N-term			-0.000446246	1361.59	681.801	1361.59	681.801	2	13	1.1.1.2135.7	24.5636	16147.9	14153.7	24.72	0.47	1928.57
tr|A0A498H9U4|A0A498H9U4_MALDO	14_3_3 domain-containing protein OS=Malus domestica OX=3750 GN=DVH24_028363 PE=3 SV=1	25.92	0	92.78	YEEMVEFMEK	Oxidation(M)@8			0.00112196	1349.55	675.784	1349.55	675.783	2	13	1.1.1.1885.4	18.6957	14435	1293.45	18.1	0.63	456.602
tr|A0A498H9U4|A0A498H9U4_MALDO	14_3_3 domain-containing protein OS=Malus domestica OX=3750 GN=DVH24_028363 PE=3 SV=1	25.92	0	92.37	YEEMVEFMEK				-0.00208611	1333.55	667.785	1333.56	667.786	2	10	1.1.1.2006.7	21.5367	138544	4411.4	21.77	0.21	759.422
tr|A0A498H9U4|A0A498H9U4_MALDO	14_3_3 domain-containing protein OS=Malus domestica OX=3750 GN=DVH24_028363 PE=3 SV=1	25.92	0	85.61	YEEMVEFMEK				0.00146143	1333.56	445.527	1333.56	445.526	3	9	1.1.1.2011.2	21.6507	3277.04	1885.96	21.74	0.21	728.875
tr|A0A498H9U4|A0A498H9U4_MALDO	14_3_3 domain-containing protein OS=Malus domestica OX=3750 GN=DVH24_028363 PE=3 SV=1	25.92	0	84.55	YEEMVEFMEK	Delta:H(4)C(2)@N-term; Oxidation(M)@4			0.000443716	1377.58	689.799	1377.58	689.799	2	12	1.1.1.2019.7	21.8481	3161.36	3098.56	21.84	0.31	555.099
tr|A0A498H9U4|A0A498H9U4_MALDO	14_3_3 domain-containing protein OS=Malus domestica OX=3750 GN=DVH24_028363 PE=3 SV=1	25.92	0	83.81	YEEMVEFMEK	Delta:H(4)C(2)@N-term; Oxidation(M)@4; Oxidation(M)@8			-0.0013512	1393.58	697.796	1393.58	697.796	2	11	1.1.1.1919.4	19.4763	4064.01	3781.62	19.49	0.4	576.77
tr|A0A498H9U4|A0A498H9U4_MALDO	14_3_3 domain-containing protein OS=Malus domestica OX=3750 GN=DVH24_028363 PE=3 SV=1	25.92	0	64.49	YEEMVEFMEK	Delta:H(4)C(2)@N-term; Oxidation(M)@4			-4.45717e-05	1377.58	689.799	1377.58	689.799	2	9	1.1.1.1954.9	20.3065	4858.87	1819.67	20.44	0.19	509.041
tr|A0A498H9U4|A0A498H9U4_MALDO	14_3_3 domain-containing protein OS=Malus domestica OX=3750 GN=DVH24_028363 PE=3 SV=1	25.92	0	63.76	YEEMVEFMEK	Oxidation(M)@4; Oxidation(M)@8			0.00221604	1365.55	683.782	1365.55	683.781	2	9	1.1.1.1767.11	15.9367	4552.37	2995.38	15.76	0.47	1164.78
tr|A0A498H9U4|A0A498H9U4_MALDO	14_3_3 domain-containing protein OS=Malus domestica OX=3750 GN=DVH24_028363 PE=3 SV=1	25.92	0	59.46	YEEMVEFMEK	Oxidation(M)@4; Dioxidation(M)@8	Dioxidation(M)@117		0.00148179	1381.54	691.779	1381.54	691.778	2	9	1.1.1.1765.15	15.8932	2684.97	2585.14	15.88	0.23	522.734
tr|A0A498H9U4|A0A498H9U4_MALDO	14_3_3 domain-containing protein OS=Malus domestica OX=3750 GN=DVH24_028363 PE=3 SV=1	25.92	0	28.23	YEEMVEFMEK	Oxidation(M)@4; Carbamyl(M)@8			0.00278344	1392.56	697.288	1392.56	697.286	2	9	1.1.1.1760.9	15.7713	3238.81	1726.09	15.86	0.23	365.309
tr|A0A498H9U4|A0A498H9U4_MALDO	14_3_3 domain-containing protein OS=Malus domestica OX=3750 GN=DVH24_028363 PE=3 SV=1	25.92	0	26.37	YEEMVEFMEK	Delta:H(4)C(2)(K)@10			-0.000538385	1361.59	681.801	1361.59	681.801	2	7	1.1.1.2158.2	25.0814	16147.9	4020.52	24.72	0.47	734.284
tr|A0A498H9U4|A0A498H9U4_MALDO	14_3_3 domain-containing protein OS=Malus domestica OX=3750 GN=DVH24_028363 PE=3 SV=1	25.92	0	26.37	YEEMVEFMEK	Delta:H(4)C(2)@N-term			-0.000538385	1361.59	681.801	1361.59	681.801	2	7	1.1.1.2158.2	25.0814	16147.9	4020.52	24.72	0.47	734.284
tr|A0A498H9U4|A0A498H9U4_MALDO	14_3_3 domain-containing protein OS=Malus domestica OX=3750 GN=DVH24_028363 PE=3 SV=1	25.92	0	23.35	YEEMVEFMEK	Dimethyl(K)@10	Dimethyl(K)@119		-0.000538385	1361.59	681.801	1361.59	681.801	2	7	1.1.1.2158.2	25.0814	16147.9	4020.52	24.72	0.47	734.284

## Sheet: Spot 2
Accession #	Name
tr|D9ZJE6|D9ZJE6_MALDO	WHY domain class transcription factor OS=Malus domestica OX=3750 GN=WHY2 PE=2 SV=1
Accessions	Names	%Cov(95)	Contrib	Conf	Sequence	Modifications	ProteinModifications	Cleavages	dMass	Obs MW	Obs m/z	Theor MW	Theor m/z	Theor z	Sc	Spectrum	Acq Time	Intensity (Peptide)	PrecursorIntensityAcquisition	Apex Time (Peptide)	Elution Peak Width (Peptide)	MS2Counts
tr|D9ZJE6|D9ZJE6_MALDO	WHY domain class transcription factor OS=Malus domestica OX=3750 GN=WHY2 PE=2 SV=1	34.3	2	99	AEIVVDVLIK				0.000821813	1097.67	549.842	1097.67	549.842	2	8	1.1.1.2231.11	24.3405	3188.99	645.54	24.64	0.69	91.5198
tr|D9ZJE6|D9ZJE6_MALDO	WHY domain class transcription factor OS=Malus domestica OX=3750 GN=WHY2 PE=2 SV=1	34.3	2	99	DFGSALWDMIR	Oxidation(M)@9			0.000306644	1325.61	442.877	1325.61	442.876	3	10	1.1.1.2378.2	27.9268	675.1	566.29	27.84	0.37	188.223
tr|D9ZJE6|D9ZJE6_MALDO	WHY domain class transcription factor OS=Malus domestica OX=3750 GN=WHY2 PE=2 SV=1	34.3	2	99	GFIQDIGEK				1.37927e-05	1005.51	503.764	1005.51	503.764	2	12	1.1.1.1997.3	18.9065	20029.2	8824.86	19.22	0.49	812.889
tr|D9ZJE6|D9ZJE6_MALDO	WHY domain class transcription factor OS=Malus domestica OX=3750 GN=WHY2 PE=2 SV=1	34.3	2	99	GITYVDVPITFR			cleaved R-P@C-term	-0.000410032	1379.74	690.88	1379.74	690.88	2	8	1.1.1.2281.8	25.566	417.64	288.21	25.48	0.27	60.0347
tr|D9ZJE6|D9ZJE6_MALDO	WHY domain class transcription factor OS=Malus domestica OX=3750 GN=WHY2 PE=2 SV=1	34.3	2	99	GITYVDVPITFRPK				-6.6142e-05	1604.89	535.971	1604.89	535.971	3	10	1.1.1.2202.6	23.6246	9554.55	8586.29	23.57	0.32	683.258
tr|D9ZJE6|D9ZJE6_MALDO	WHY domain class transcription factor OS=Malus domestica OX=3750 GN=WHY2 PE=2 SV=1	34.3	2	99	GNINVDTPFGAMK				0.000264739	1362.66	455.227	1362.66	455.227	3	10	1.1.1.2126.4	21.7853	1101.61	642.01	21.66	0.38	407.62
tr|D9ZJE6|D9ZJE6_MALDO	WHY domain class transcription factor OS=Malus domestica OX=3750 GN=WHY2 PE=2 SV=1	34.3	2	99	VDLIVDVPVIGR				0.000364497	1293.77	432.263	1293.77	432.262	3	10	1.1.1.2321.2	26.5099	629.89	297.72	26.6	0.17	243.332
tr|D9ZJE6|D9ZJE6_MALDO	WHY domain class transcription factor OS=Malus domestica OX=3750 GN=WHY2 PE=2 SV=1	34.3	2	99	VKVDLIVDVPVIGR			missed K-V@2	0.000353076	1520.93	761.472	1520.93	761.472	2	9	1.1.1.2283.8	25.6142	1163.47	991.49	25.79	0.48	150.442
tr|D9ZJE6|D9ZJE6_MALDO	WHY domain class transcription factor OS=Malus domestica OX=3750 GN=WHY2 PE=2 SV=1	34.3	2	99	VPVHLVYDDIK				0.00118993	1296.71	433.244	1296.71	433.243	3	14	1.1.1.2004.2	19.0636	9570.62	5721.36	18.92	0.28	922.893
tr|D9ZJE6|D9ZJE6_MALDO	WHY domain class transcription factor OS=Malus domestica OX=3750 GN=WHY2 PE=2 SV=1	34.3	1.33724	96.97	STYDDIKPGSIIPYR				-0.00132855	1723.88	575.633	1723.88	575.633	3	11	1.1.1.2087.5	20.8574	16691.2	3243	20.61	0.31	316.581
tr|D9ZJE6|D9ZJE6_MALDO	WHY domain class transcription factor OS=Malus domestica OX=3750 GN=WHY2 PE=2 SV=1	34.3	0.939302	92.95	TGEIPIPYKPDVDVEK				0.000507883	1798.94	600.653	1798.94	600.652	3	9	1.1.1.2068.11	20.4061	41907.1	2621.17	20.1	0.25	295.723
tr|D9ZJE6|D9ZJE6_MALDO	WHY domain class transcription factor OS=Malus domestica OX=3750 GN=WHY2 PE=2 SV=1	34.3	0.266001	98.36	IEGAIGFGK			cleaved K-P@C-term	-8.36531e-06	890.486	446.25	890.486	446.25	2	11	1.1.1.1908.4	16.9068	1350.02	1012.32	16.8	0.4	297.84
tr|D9ZJE6|D9ZJE6_MALDO	WHY domain class transcription factor OS=Malus domestica OX=3750 GN=WHY2 PE=2 SV=1	34.3	0.234331	52.35	ITIPLEK				0.000548385	812.501	407.258	812.501	407.258	2	8	1.1.1.1964.2	18.1785	135382	3718.06	18.47	0.28	745.702
tr|D9ZJE6|D9ZJE6_MALDO	WHY domain class transcription factor OS=Malus domestica OX=3750 GN=WHY2 PE=2 SV=1	34.3	0.0835461	24.53	TGEIPIPYKPDVDVEKIR			missed K-I@16	-0.00117753	2068.12	518.037	2068.12	518.037	4	7	1.1.1.2093.7	20.9953	608.48	533.8	20.96	0.26	291.875
tr|D9ZJE6|D9ZJE6_MALDO	WHY domain class transcription factor OS=Malus domestica OX=3750 GN=WHY2 PE=2 SV=1	34.3	0.0716042	25.72	KEEGEEEGGFIDK			missed K-E@1	0.000602199	1465.66	489.56	1465.66	489.56	3	6	1.1.1.1726.2	12.8449	209.49	130.33	12.65	0.41	79.8747
tr|D9ZJE6|D9ZJE6_MALDO	WHY domain class transcription factor OS=Malus domestica OX=3750 GN=WHY2 PE=2 SV=1	34.3	0	99	AEIVVDVLIK				0.000821813	1097.67	549.842	1097.67	549.842	2	14	1.1.1.2252.8	24.8534	3188.99	2493.82	24.64	0.69	236.072
tr|D9ZJE6|D9ZJE6_MALDO	WHY domain class transcription factor OS=Malus domestica OX=3750 GN=WHY2 PE=2 SV=1	34.3	0	99	AEIVVDVLIK				0.000821813	1097.67	549.842	1097.67	549.842	2	12	1.1.1.2273.6	25.3675	3188.99	1052.95	24.64	0.69	116.189
tr|D9ZJE6|D9ZJE6_MALDO	WHY domain class transcription factor OS=Malus domestica OX=3750 GN=WHY2 PE=2 SV=1	34.3	0	99	AEIVVDVLIK				-0.00589241	1097.66	549.839	1097.67	549.842	2	9	1.1.1.2492.2	29.974	277.1	265.55	29.99	0.2	47.69
tr|D9ZJE6|D9ZJE6_MALDO	WHY domain class transcription factor OS=Malus domestica OX=3750 GN=WHY2 PE=2 SV=1	34.3	0	99	AEIVVDVLIK				0.000821813	1097.67	549.842	1097.67	549.842	2	8	1.1.1.2256.5	24.9463	3188.99	2122.8	24.64	0.69	143.495
tr|D9ZJE6|D9ZJE6_MALDO	WHY domain class transcription factor OS=Malus domestica OX=3750 GN=WHY2 PE=2 SV=1	34.3	0	99	AEIVVDVLIK				-0.0123625	1097.66	549.836	1097.67	549.842	2	5	1.1.1.2315.7	26.37	569.53	288.77	25.98	0.4	56.8058
tr|D9ZJE6|D9ZJE6_MALDO	WHY domain class transcription factor OS=Malus domestica OX=3750 GN=WHY2 PE=2 SV=1	34.3	0	99	AEIVVDVLIK				-0.0117521	1097.66	549.836	1097.67	549.842	2	6	1.1.1.2294.8	25.8698	696.08	625.54	25.77	0.74	96.6869
tr|D9ZJE6|D9ZJE6_MALDO	WHY domain class transcription factor OS=Malus domestica OX=3750 GN=WHY2 PE=2 SV=1	34.3	0	99	DFGSALWDMIR	Dioxidation(W)@7; Oxidation(M)@9			-0.00161121	1357.6	679.805	1357.6	679.806	2	11	1.1.1.2260.11	25.0518	1975.99	770.37	25.38	0.47	207.515
tr|D9ZJE6|D9ZJE6_MALDO	WHY domain class transcription factor OS=Malus domestica OX=3750 GN=WHY2 PE=2 SV=1	34.3	0	99	DFGSALWDMIR	Oxidation(M)@9			-0.000784624	1325.61	663.811	1325.61	663.811	2	13	1.1.1.2352.5	27.2849	4837.33	821.77	27.72	0.62	120.674
tr|D9ZJE6|D9ZJE6_MALDO	WHY domain class transcription factor OS=Malus domestica OX=3750 GN=WHY2 PE=2 SV=1	34.3	0	99	DFGSALWDMIR	Oxidation(M)@9			-0.000608927	1325.61	442.876	1325.61	442.876	3	8	1.1.1.2360.3	27.4785	657.23	405.99	27.59	0.35	121.418
tr|D9ZJE6|D9ZJE6_MALDO	WHY domain class transcription factor OS=Malus domestica OX=3750 GN=WHY2 PE=2 SV=1	34.3	0	99	DFGSALWDMIR	Oxidation(M)@9			-0.000608927	1325.61	442.876	1325.61	442.876	3	9	1.1.1.2364.2	27.5714	657.23	594.57	27.59	0.35	146.094
tr|D9ZJE6|D9ZJE6_MALDO	WHY domain class transcription factor OS=Malus domestica OX=3750 GN=WHY2 PE=2 SV=1	34.3	0	99	DFGSALWDMIR	Oxidation(M)@9			-0.000608927	1325.61	442.876	1325.61	442.876	3	9	1.1.1.2365.2	27.5995	657.23	643.92	27.59	0.35	136.254
tr|D9ZJE6|D9ZJE6_MALDO	WHY domain class transcription factor OS=Malus domestica OX=3750 GN=WHY2 PE=2 SV=1	34.3	0	99	DFGSALWDMIR	Oxidation(M)@9			-0.000608927	1325.61	442.876	1325.61	442.876	3	10	1.1.1.2368.2	27.6723	657.23	603.09	27.59	0.35	153.109
tr|D9ZJE6|D9ZJE6_MALDO	WHY domain class transcription factor OS=Malus domestica OX=3750 GN=WHY2 PE=2 SV=1	34.3	0	99	DFGSALWDMIR	Oxidation(M)@9			-0.000784624	1325.61	663.811	1325.61	663.811	2	17	1.1.1.2373.3	27.8102	4837.33	4491	27.72	0.62	466.84
tr|D9ZJE6|D9ZJE6_MALDO	WHY domain class transcription factor OS=Malus domestica OX=3750 GN=WHY2 PE=2 SV=1	34.3	0	99	DFGSALWDMIR	Oxidation(M)@9			0.000306644	1325.61	442.877	1325.61	442.876	3	10	1.1.1.2377.2	27.8976	675.1	580.32	27.84	0.37	182.039
tr|D9ZJE6|D9ZJE6_MALDO	WHY domain class transcription factor OS=Malus domestica OX=3750 GN=WHY2 PE=2 SV=1	34.3	0	99	DFGSALWDMIR	Oxidation(M)@9			-0.000784624	1325.61	663.811	1325.61	663.811	2	12	1.1.1.2397.3	28.3196	4837.33	315.72	27.72	0.62	86.7214
tr|D9ZJE6|D9ZJE6_MALDO	WHY domain class transcription factor OS=Malus domestica OX=3750 GN=WHY2 PE=2 SV=1	34.3	0	99	DFGSALWDMIR				-0.00238	1309.61	655.812	1309.61	655.814	2	17	1.1.1.2503.6	30.2525	9184.88	8003.62	30.27	0.05	1358.27
tr|D9ZJE6|D9ZJE6_MALDO	WHY domain class transcription factor OS=Malus domestica OX=3750 GN=WHY2 PE=2 SV=1	34.3	0	99	DFGSALWDMIR	Oxidation(M)@9			0.000306644	1325.61	442.877	1325.61	442.876	3	8	1.1.1.2375.2	27.8519	675.1	628.2	27.84	0.37	182.076
tr|D9ZJE6|D9ZJE6_MALDO	WHY domain class transcription factor OS=Malus domestica OX=3750 GN=WHY2 PE=2 SV=1	34.3	0	99	DFGSALWDMIR	Oxidation(W)@7; Oxidation(M)@9			0.00118076	1341.6	671.809	1341.6	671.808	2	9	1.1.1.2184.6	23.1929	431.21	404.88	23.23	0.27	123.536
tr|D9ZJE6|D9ZJE6_MALDO	WHY domain class transcription factor OS=Malus domestica OX=3750 GN=WHY2 PE=2 SV=1	34.3	0	99	DFGSALWDMIR	Oxidation(M)@9			0.000306644	1325.61	442.877	1325.61	442.876	3	8	1.1.1.2379.2	27.9483	675.1	523.91	27.84	0.37	180.633
tr|D9ZJE6|D9ZJE6_MALDO	WHY domain class transcription factor OS=Malus domestica OX=3750 GN=WHY2 PE=2 SV=1	34.3	0	99	DFGSALWDMIR	Oxidation(M)@9			0.000306644	1325.61	442.877	1325.61	442.876	3	7	1.1.1.2376.3	27.8792	675.1	592.96	27.84	0.37	200.624
tr|D9ZJE6|D9ZJE6_MALDO	WHY domain class transcription factor OS=Malus domestica OX=3750 GN=WHY2 PE=2 SV=1	34.3	0	99	DFGSALWDMIR	Dioxidation(W)@7; Oxidation(M)@9			-0.00161121	1357.6	679.805	1357.6	679.806	2	7	1.1.1.2281.7	25.5643	1975.99	986.71	25.38	0.47	168.483
tr|D9ZJE6|D9ZJE6_MALDO	WHY domain class transcription factor OS=Malus domestica OX=3750 GN=WHY2 PE=2 SV=1	34.3	0	92.53	DFGSALWDMIR	Oxidation(M)@9			0.000306644	1325.61	442.877	1325.61	442.876	3	7	1.1.1.2384.4	28.0559	675.1	273.91	27.84	0.37	183.307
tr|D9ZJE6|D9ZJE6_MALDO	WHY domain class transcription factor OS=Malus domestica OX=3750 GN=WHY2 PE=2 SV=1	34.3	0	97.04	GFIQDIGEK				1.37927e-05	1005.51	503.764	1005.51	503.764	2	9	1.1.1.2019.6	19.4139	20029.2	11158.2	19.22	0.49	921.595
tr|D9ZJE6|D9ZJE6_MALDO	WHY domain class transcription factor OS=Malus domestica OX=3750 GN=WHY2 PE=2 SV=1	34.3	0	99	GITYVDVPITFRPK				-6.6142e-05	1604.89	535.971	1604.89	535.971	3	12	1.1.1.2198.5	23.5327	9554.55	9220.9	23.57	0.32	698.462
tr|D9ZJE6|D9ZJE6_MALDO	WHY domain class transcription factor OS=Malus domestica OX=3750 GN=WHY2 PE=2 SV=1	34.3	0	99	GITYVDVPITFRPK				-6.6142e-05	1604.89	535.971	1604.89	535.971	3	12	1.1.1.2199.3	23.5512	9554.55	9372.1	23.57	0.32	735.345
tr|D9ZJE6|D9ZJE6_MALDO	WHY domain class transcription factor OS=Malus domestica OX=3750 GN=WHY2 PE=2 SV=1	34.3	0	99	GITYVDVPITFRPK				-6.6142e-05	1604.89	535.971	1604.89	535.971	3	9	1.1.1.2200.9	23.5796	9554.55	9417.29	23.57	0.32	721.87
tr|D9ZJE6|D9ZJE6_MALDO	WHY domain class transcription factor OS=Malus domestica OX=3750 GN=WHY2 PE=2 SV=1	34.3	0	99	GITYVDVPITFRPK				-6.6142e-05	1604.89	535.971	1604.89	535.971	3	10	1.1.1.2201.3	23.5993	9554.55	9146.14	23.57	0.32	646.706
tr|D9ZJE6|D9ZJE6_MALDO	WHY domain class transcription factor OS=Malus domestica OX=3750 GN=WHY2 PE=2 SV=1	34.3	0	99	GITYVDVPITFRPK				-6.6142e-05	1604.89	535.971	1604.89	535.971	3	12	1.1.1.2203.10	23.6595	9554.55	7380.09	23.57	0.32	589.883
tr|D9ZJE6|D9ZJE6_MALDO	WHY domain class transcription factor OS=Malus domestica OX=3750 GN=WHY2 PE=2 SV=1	34.3	0	99	GITYVDVPITFRPK				-6.6142e-05	1604.89	535.971	1604.89	535.971	3	10	1.1.1.2204.10	23.6764	9554.55	6767.58	23.57	0.32	550.371
tr|D9ZJE6|D9ZJE6_MALDO	WHY domain class transcription factor OS=Malus domestica OX=3750 GN=WHY2 PE=2 SV=1	34.3	0	99	GITYVDVPITFRPK				-6.6142e-05	1604.89	535.971	1604.89	535.971	3	9	1.1.1.2205.5	23.6999	9554.55	5842.57	23.57	0.32	505.923
tr|D9ZJE6|D9ZJE6_MALDO	WHY domain class transcription factor OS=Malus domestica OX=3750 GN=WHY2 PE=2 SV=1	34.3	0	99	GITYVDVPITFRPK				-6.6142e-05	1604.89	535.971	1604.89	535.971	3	11	1.1.1.2206.5	23.7264	9554.55	4713.62	23.57	0.32	400.354
tr|D9ZJE6|D9ZJE6_MALDO	WHY domain class transcription factor OS=Malus domestica OX=3750 GN=WHY2 PE=2 SV=1	34.3	0	99	GITYVDVPITFRPK				-6.6142e-05	1604.89	535.971	1604.89	535.971	3	11	1.1.1.2207.3	23.7455	9554.55	3842.14	23.57	0.32	366.67
tr|D9ZJE6|D9ZJE6_MALDO	WHY domain class transcription factor OS=Malus domestica OX=3750 GN=WHY2 PE=2 SV=1	34.3	0	99	GNINVDTPFGAMK				0.000563009	1362.66	682.338	1362.66	682.337	2	20	1.1.1.2119.9	21.6236	22375.9	22309.6	21.61	0.31	1900.81
tr|D9ZJE6|D9ZJE6_MALDO	WHY domain class transcription factor OS=Malus domestica OX=3750 GN=WHY2 PE=2 SV=1	34.3	0	99	GNINVDTPFGAMK				0.000264739	1362.66	455.227	1362.66	455.227	3	12	1.1.1.2120.2	21.6383	1101.61	1087.19	21.66	0.38	470.721
tr|D9ZJE6|D9ZJE6_MALDO	WHY domain class transcription factor OS=Malus domestica OX=3750 GN=WHY2 PE=2 SV=1	34.3	0	99	GNINVDTPFGAMK				0.000264739	1362.66	455.227	1362.66	455.227	3	12	1.1.1.2121.3	21.6639	1101.61	1023.56	21.66	0.38	439.256
tr|D9ZJE6|D9ZJE6_MALDO	WHY domain class transcription factor OS=Malus domestica OX=3750 GN=WHY2 PE=2 SV=1	34.3	0	99	GNINVDTPFGAMK				0.000264739	1362.66	455.227	1362.66	455.227	3	10	1.1.1.2122.3	21.685	1101.61	988.91	21.66	0.38	440.773
tr|D9ZJE6|D9ZJE6_MALDO	WHY domain class transcription factor OS=Malus domestica OX=3750 GN=WHY2 PE=2 SV=1	34.3	0	99	GNINVDTPFGAMK				0.000264739	1362.66	455.227	1362.66	455.227	3	9	1.1.1.2128.6	21.8424	1101.61	514.05	21.66	0.38	328.875
tr|D9ZJE6|D9ZJE6_MALDO	WHY domain class transcription factor OS=Malus domestica OX=3750 GN=WHY2 PE=2 SV=1	34.3	0	99	GNINVDTPFGAMK				0.000563009	1362.66	682.338	1362.66	682.337	2	9	1.1.1.2141.7	22.145	22375.9	614.48	21.61	0.31	133.618
tr|D9ZJE6|D9ZJE6_MALDO	WHY domain class transcription factor OS=Malus domestica OX=3750 GN=WHY2 PE=2 SV=1	34.3	0	99	GNINVDTPFGAMK				0.000264739	1362.66	455.227	1362.66	455.227	3	8	1.1.1.2125.3	21.7575	1101.61	667.12	21.66	0.38	422.782
tr|D9ZJE6|D9ZJE6_MALDO	WHY domain class transcription factor OS=Malus domestica OX=3750 GN=WHY2 PE=2 SV=1	34.3	0	99	GNINVDTPFGAMK	Oxidation(M)@12			0.00157085	1378.66	690.336	1378.66	690.335	2	13	1.1.1.1997.4	18.9106	5933.36	980.18	18.68	0.28	131.863
tr|D9ZJE6|D9ZJE6_MALDO	WHY domain class transcription factor OS=Malus domestica OX=3750 GN=WHY2 PE=2 SV=1	34.3	0	99	GNINVDTPFGAMK				0.000264739	1362.66	455.227	1362.66	455.227	3	7	1.1.1.2123.4	21.7101	1101.61	892.91	21.66	0.38	433.265
tr|D9ZJE6|D9ZJE6_MALDO	WHY domain class transcription factor OS=Malus domestica OX=3750 GN=WHY2 PE=2 SV=1	34.3	0	99	GNINVDTPFGAMK				0.000264739	1362.66	455.227	1362.66	455.227	3	8	1.1.1.2131.5	21.9115	1101.61	260.51	21.66	0.38	308.947
tr|D9ZJE6|D9ZJE6_MALDO	WHY domain class transcription factor OS=Malus domestica OX=3750 GN=WHY2 PE=2 SV=1	34.3	0	94.36	GNINVDTPFGAMK				0.0034583	1362.66	682.339	1362.66	682.337	2	8	1.1.1.2060.13	20.2131	748.55	591.14	20.27	0.57	155.139
tr|D9ZJE6|D9ZJE6_MALDO	WHY domain class transcription factor OS=Malus domestica OX=3750 GN=WHY2 PE=2 SV=1	34.3	0	52.35	GNINVDTPFGAMK				0.000264739	1362.66	455.227	1362.66	455.227	3	7	1.1.1.2129.3	21.8569	1101.61	466.83	21.66	0.38	330.256
tr|D9ZJE6|D9ZJE6_MALDO	WHY domain class transcription factor OS=Malus domestica OX=3750 GN=WHY2 PE=2 SV=1	34.3	0	40.12	GNINVDTPFGAMK	Oxidation(P)@8	Oxidation(P)@277		0.00157086	1378.66	690.336	1378.66	690.335	2	6	1.1.1.1975.13	18.3953	5933.36	640.83	18.68	0.28	110.91
tr|D9ZJE6|D9ZJE6_MALDO	WHY domain class transcription factor OS=Malus domestica OX=3750 GN=WHY2 PE=2 SV=1	34.3	0	32.13	GNINVDTPFGAMK				0.000264739	1362.66	455.227	1362.66	455.227	3	6	1.1.1.2130.6	21.882	1101.61	363.02	21.66	0.38	304.288
tr|D9ZJE6|D9ZJE6_MALDO	WHY domain class transcription factor OS=Malus domestica OX=3750 GN=WHY2 PE=2 SV=1	34.3	0	16.92	GNINVDTPFGAMK	Oxidation(M)@12			0.00157085	1378.66	690.336	1378.66	690.335	2	5	1.1.1.1975.13	18.3953	5933.36	640.83	18.68	0.28	110.91
tr|D9ZJE6|D9ZJE6_MALDO	WHY domain class transcription factor OS=Malus domestica OX=3750 GN=WHY2 PE=2 SV=1	34.3	0	20.15	ITIPLEK				0.000548385	812.501	407.258	812.501	407.258	2	10	1.1.1.1987.2	18.6632	135382	49834.8	18.47	0.28	6221.08
tr|D9ZJE6|D9ZJE6_MALDO	WHY domain class transcription factor OS=Malus domestica OX=3750 GN=WHY2 PE=2 SV=1	34.3	0	99	VDLIVDVPVIGR				-0.00149483	1293.76	647.889	1293.77	647.89	2	10	1.1.1.2342.3	27.0319	8311.11	278.72	26.65	0.29	92.1315
tr|D9ZJE6|D9ZJE6_MALDO	WHY domain class transcription factor OS=Malus domestica OX=3750 GN=WHY2 PE=2 SV=1	34.3	0	99	VKVDLIVDVPVIGR			missed K-V@2	0.000353076	1520.93	761.472	1520.93	761.472	2	12	1.1.1.2304.4	26.1228	1163.47	363.56	25.79	0.48	129.257
tr|D9ZJE6|D9ZJE6_MALDO	WHY domain class transcription factor OS=Malus domestica OX=3750 GN=WHY2 PE=2 SV=1	34.3	0	99	VPVHLVYDDIK				0.00118993	1296.71	433.244	1296.71	433.243	3	14	1.1.1.2009.2	19.1814	9570.62	1960.49	18.92	0.28	451.604
Accession #	Name
tr|Q9SYV9|Q9SYV9_MALDO	Major allergen mal d 1 OS=Malus domestica OX=3750 GN=MALD1 PE=2 SV=1
tr|Q9SYV8|Q9SYV8_MALDO	Major allergen mal d 1 OS=Malus domestica OX=3750 GN=MALD1 PE=2 SV=1
tr|Q9SYV4|Q9SYV4_MALDO	Major allergen mal d 1 OS=Malus domestica OX=3750 GN=MALD1 PE=2 SV=1
tr|Q9SYV2|Q9SYV2_MALDO	Major allergen mal d 1 OS=Malus domestica OX=3750 GN=MALD1 PE=2 SV=1
tr|Q9S7M5|Q9S7M5_MALDO	Allergen Mal d 1.02 OS=Malus domestica OX=3750 GN=MALD1 PE=2 SV=1
tr|Q941P5|Q941P5_MALDO	Ribonuclease-like PR-10a OS=Malus domestica OX=3750 GN=YPR10*a PE=3 SV=1
tr|B7VFN6|B7VFN6_MALDO	PR-10 protein (Fragment) OS=Malus domestica OX=3750 GN=mal d 1.02 PE=2 SV=1
tr|A0AUB1|A0AUB1_MALDO	Allergen Mal d 1.02 OS=Malus domestica OX=3750 GN=Mal d 1.02 PE=3 SV=1
sp|Q40280|MAL12_MALDO	Major allergen Mal d 1 OS=Malus domestica OX=3750 PE=1 SV=3
tr|Q9SYW3|Q9SYW3_MALDO	Major allergen Mal d 1 OS=Malus domestica OX=3750 GN=MALD1 PE=2 SV=1
tr|Q9SYV7|Q9SYV7_MALDO	Major allergen mal d 1 OS=Malus domestica OX=3750 GN=MALD1 PE=2 SV=1
tr|Q9SYV6|Q9SYV6_MALDO	Major allergen Mal d 1.01 OS=Malus domestica OX=3750 GN=MALD1 PE=2 SV=1
tr|Q9SYV5|Q9SYV5_MALDO	Major allergen mal d 1 OS=Malus domestica OX=3750 GN=MALD1 PE=2 SV=1
tr|Q941P6|Q941P6_MALDO	Mal d 1.0109 OS=Malus domestica OX=3750 GN=YPR10*c PE=3 SV=1
tr|Q8L6K9|Q8L6K9_MALDO	Major allergen d 1 (Fragment) OS=Malus domestica OX=3750 GN=Mal d 1 PE=2 SV=1
tr|F5CEW9|F5CEW9_MALDO	Mal d 1.01 OS=Malus domestica OX=3750 GN=Mal d 1.01 PE=3 SV=1
sp|P43211|MAL11_MALDO	Major allergen Mal d 1 OS=Malus domestica OX=3750 GN=MALD1 PE=1 SV=2
tr|F6M053|F6M053_MALDO	Allergen Mal d 1.02 OS=Malus domestica OX=3750 GN=Mal d 1.02 PE=3 SV=1
Accessions	Names	%Cov(95)	Contrib	Conf	Sequence	Modifications	ProteinModifications	Cleavages	dMass	Obs MW	Obs m/z	Theor MW	Theor m/z	Theor z	Sc	Spectrum	Acq Time	Intensity (Peptide)	PrecursorIntensityAcquisition	Apex Time (Peptide)	Elution Peak Width (Peptide)	MS2Counts
tr|Q9SYV9|Q9SYV9_MALDO; tr|Q9SYV8|Q9SYV8_MALDO; tr|Q9SYV4|Q9SYV4_MALDO; tr|Q9SYV2|Q9SYV2_MALDO; tr|Q9S7M5|Q9S7M5_MALDO; tr|Q941P5|Q941P5_MALDO; tr|B7VFN6|B7VFN6_MALDO; tr|A0AUB1|A0AUB1_MALDO; sp|Q40280|MAL12_MALDO; tr|Q9SYW3|Q9SYW3_MALDO; tr|Q9SYV7|Q9SYV7_MALDO; tr|Q9SYV6|Q9SYV6_MALDO; tr|Q9SYV5|Q9SYV5_MALDO; tr|Q941P6|Q941P6_MALDO; tr|Q8L6K9|Q8L6K9_MALDO; tr|F5CEW9|F5CEW9_MALDO; sp|P43211|MAL11_…	Major allergen mal d 1 OS=Malus domestica OX=3750 GN=MALD1 PE=2 SV=1; Major allergen mal d 1 OS=Malus domestica OX=3750 GN=MALD1 PE=2 SV=1; Major allergen mal d 1 OS=Malus domestica OX=3750 GN=MALD1 PE=2 SV=1; Major allergen mal d 1 OS=Malus domestica OX=3750 GN=MALD1 PE=2 SV=1; Allergen Mal d 1.02 OS=Malus domestica OX=3750 GN=MALD1 PE=2 SV=1; Ribonuclease-like PR-10a OS=Malus domestica OX=3750 …	7.547	2	99	AFVLDADNLIPK				-0.00173575	1314.72	658.366	1314.72	658.366	2	7	1.1.1.2302.3	26.0638	505.18	254.27	26.22	0.38	131.582
tr|Q9SYV9|Q9SYV9_MALDO; tr|Q9SYV8|Q9SYV8_MALDO; tr|Q9SYV4|Q9SYV4_MALDO; tr|Q9SYV2|Q9SYV2_MALDO; tr|Q9S7M5|Q9S7M5_MALDO; tr|Q941P5|Q941P5_MALDO; tr|B7VFN6|B7VFN6_MALDO; tr|A0AUB1|A0AUB1_MALDO; sp|Q40280|MAL12_MALDO; tr|Q9SYW3|Q9SYW3_MALDO; tr|Q9SYV7|Q9SYV7_MALDO; tr|Q9SYV6|Q9SYV6_MALDO; tr|Q9SYV5|Q9SYV5_MALDO; tr|Q941P6|Q941P6_MALDO; tr|Q8L6K9|Q8L6K9_MALDO; tr|F5CEW9|F5CEW9_MALDO; sp|P43211|MAL11_…	Major allergen mal d 1 OS=Malus domestica OX=3750 GN=MALD1 PE=2 SV=1; Major allergen mal d 1 OS=Malus domestica OX=3750 GN=MALD1 PE=2 SV=1; Major allergen mal d 1 OS=Malus domestica OX=3750 GN=MALD1 PE=2 SV=1; Major allergen mal d 1 OS=Malus domestica OX=3750 GN=MALD1 PE=2 SV=1; Allergen Mal d 1.02 OS=Malus domestica OX=3750 GN=MALD1 PE=2 SV=1; Ribonuclease-like PR-10a OS=Malus domestica OX=3750 …	7.547	0.0282604	27.94	LIESYLK				-0.00177662	864.494	433.254	864.496	433.255	2	5	1.1.1.1940.3	17.6538	392.92	303	17.67	0.5	240.33

## Sheet: Spot 3
Accession #	Name
tr|A0A498IWS8|A0A498IWS8_MALDO	DNA replication licensing factor MCM6 OS=Malus domestica OX=3750 GN=DVH24_022010 PE=3 SV=1
Accessions	Names	%Cov(95)	Contrib	Conf	Sequence	Modifications	ProteinModifications	Cleavages	dMass	Obs MW	Obs m/z	Theor MW	Theor m/z	Theor z	Sc	Spectrum	Acq Time	Intensity (Peptide)	PrecursorIntensityAcquisition	Apex Time (Peptide)	Elution Peak Width (Peptide)	MS2Counts
tr|A0A498IWS8|A0A498IWS8_MALDO	DNA replication licensing factor MCM6 OS=Malus domestica OX=3750 GN=DVH24_022010 PE=3 SV=1	15.95	2	99	APPPKVEESAAAEPPKL			missed K-V@5; missed K-L@16	-0.000838805	1729.92	577.649	1729.93	577.649	3	22	1.1.1.1865.7	15.8758	254941	5254.29	16.23	0.37	532.828
tr|A0A498IWS8|A0A498IWS8_MALDO	DNA replication licensing factor MCM6 OS=Malus domestica OX=3750 GN=DVH24_022010 PE=3 SV=1	15.95	2	99	FLEELAK				-0.000422667	848.464	425.239	848.464	425.239	2	8	1.1.1.3115.2	35.789	416.26	361.42	35.82	0.54	101.108
tr|A0A498IWS8|A0A498IWS8_MALDO	DNA replication licensing factor MCM6 OS=Malus domestica OX=3750 GN=DVH24_022010 PE=3 SV=1	15.95	2	99	FLEELAKIEFPG			cleaved G-S@C-term; missed K-I@7	-0.000308841	1391.73	696.874	1391.73	696.874	2	7	1.1.1.2390.7	28.4017	1868.17	776.08	28.19	0.42	126.203
tr|A0A498IWS8|A0A498IWS8_MALDO	DNA replication licensing factor MCM6 OS=Malus domestica OX=3750 GN=DVH24_022010 PE=3 SV=1	15.95	2	99	FLEELAKIEFPGSK	Carbamyl(K)@7		cleaved K-P@C-term; missed K-I@7	0.00082657	1649.87	825.941	1649.87	825.94	2	18	1.1.1.2371.15	27.9339	5252.57	2567.78	27.77	0.39	249.395
tr|A0A498IWS8|A0A498IWS8_MALDO	DNA replication licensing factor MCM6 OS=Malus domestica OX=3750 GN=DVH24_022010 PE=3 SV=1	15.95	2	99	GPAYVSGPVFF			cleaved Y-G@N-term; cleaved F-V@C-term	-0.000324389	1139.56	570.79	1139.57	570.79	2	8	1.1.1.2372.5	27.9503	890.91	355.22	28.17	0.42	98.7163
tr|A0A498IWS8|A0A498IWS8_MALDO	DNA replication licensing factor MCM6 OS=Malus domestica OX=3750 GN=DVH24_022010 PE=3 SV=1	15.95	2	99	IEFPGSKPVSEASSK				-0.000677695	1561.8	781.906	1561.8	781.907	2	25	1.1.1.1863.6	15.8298	151640	43831.4	15.6	0.28	2557.7
tr|A0A498IWS8|A0A498IWS8_MALDO	DNA replication licensing factor MCM6 OS=Malus domestica OX=3750 GN=DVH24_022010 PE=3 SV=1	15.95	2	99	SFDDSKEEITK			missed K-E@6	0.0028472	1297.61	433.543	1297.6	433.542	3	14	1.1.1.1701.2	12.0163	185277	11761	11.74	0.18	1182.7
tr|A0A498IWS8|A0A498IWS8_MALDO	DNA replication licensing factor MCM6 OS=Malus domestica OX=3750 GN=DVH24_022010 PE=3 SV=1	15.95	2	99	SFDDSKEEITKEFEEK			missed K-E@6; missed K-E@11	0.00160222	1959.9	490.981	1959.89	490.981	4	14	1.1.1.2001.8	19.0126	32205.8	25035.2	19.08	0.35	2177.75
tr|A0A498IWS8|A0A498IWS8_MALDO	DNA replication licensing factor MCM6 OS=Malus domestica OX=3750 GN=DVH24_022010 PE=3 SV=1	15.95	2	99	VEESAAAEPPKL			missed K-L@11	-0.00153804	1239.63	620.824	1239.63	620.825	2	19	1.1.1.1860.6	15.7605	43716.1	15419.5	15.56	0.28	1592.08
tr|A0A498IWS8|A0A498IWS8_MALDO	DNA replication licensing factor MCM6 OS=Malus domestica OX=3750 GN=DVH24_022010 PE=3 SV=1	15.95	2	99	VEPPPLPAEAAK				-0.00214108	1217.66	609.839	1217.67	609.84	2	18	1.1.1.1878.4	16.1697	1185126	94544.1	16.65	0.3	7682.18
tr|A0A498IWS8|A0A498IWS8_MALDO	DNA replication licensing factor MCM6 OS=Malus domestica OX=3750 GN=DVH24_022010 PE=3 SV=1	15.95	2	99	VIELYEACSAEIK	Delta:H(4)C(2)@N-term; Carbamidomethyl(C)@8			0.00280748	1551.79	776.901	1551.79	776.9	2	8	1.1.1.2435.5	29.516	20.8915	20.8915			54.8056
tr|A0A498IWS8|A0A498IWS8_MALDO	DNA replication licensing factor MCM6 OS=Malus domestica OX=3750 GN=DVH24_022010 PE=3 SV=1	15.95	2	99	VIELYEACSAEIKTLVK	Carbamidomethyl(C)@8; Carbamyl(K)@13		missed K-T@13	-5.70264e-05	2008.05	670.359	2008.06	670.359	3	15	1.1.1.2377.6	28.0828	3358.24	510.02	27.19	0.48	247.914
tr|A0A498IWS8|A0A498IWS8_MALDO	DNA replication licensing factor MCM6 OS=Malus domestica OX=3750 GN=DVH24_022010 PE=3 SV=1	15.95	2	99	VSGPVFFVFEK			cleaved Y-V@N-term	-0.000685392	1254.66	628.339	1254.66	628.34	2	10	1.1.1.2374.5	28.0016	1526.77	1098.18	27.77	0.52	257.841
tr|A0A498IWS8|A0A498IWS8_MALDO	DNA replication licensing factor MCM6 OS=Malus domestica OX=3750 GN=DVH24_022010 PE=3 SV=1	15.95	2	99	VSTFIVIEEK				0.0179318	1163.66	582.838	1163.64	582.829	2	7	1.1.1.2271.7	25.5086	39.3565	39.3565			136.568
tr|A0A498IWS8|A0A498IWS8_MALDO	DNA replication licensing factor MCM6 OS=Malus domestica OX=3750 GN=DVH24_022010 PE=3 SV=1	15.95	2	99	VSTFIVIEEKVEPPPLPAEAAK			missed K-V@10	-0.000368172	2363.3	591.832	2363.3	591.832	4	10	1.1.1.2258.5	25.1887	11299.8	2799.29	25.43	0.44	691.354
tr|A0A498IWS8|A0A498IWS8_MALDO	DNA replication licensing factor MCM6 OS=Malus domestica OX=3750 GN=DVH24_022010 PE=3 SV=1	15.95	2	99	YGPAYVSGPVFF			cleaved F-V@C-term	0.00233244	1302.63	652.323	1302.63	652.322	2	9	1.1.1.2451.7	29.9127	6443.07	260.16	29.42	0.62	229.535
tr|A0A498IWS8|A0A498IWS8_MALDO	DNA replication licensing factor MCM6 OS=Malus domestica OX=3750 GN=DVH24_022010 PE=3 SV=1	15.95	2	99	YVSGPVFFVFEK			cleaved A-Y@N-term	-0.00118758	1417.73	709.871	1417.73	709.871	2	8	1.1.1.2422.7	29.1932	857.31	494.03	29.08	0.25	103.945
tr|A0A498IWS8|A0A498IWS8_MALDO	DNA replication licensing factor MCM6 OS=Malus domestica OX=3750 GN=DVH24_022010 PE=3 SV=1	15.95	1.82391	99	EEITKEFEEK	Glu->pyro-Glu@N-term		missed K-E@5	0.000652373	1262.6	632.309	1262.6	632.309	2	16	1.1.1.1956.8	17.964	18536.1	14521.1	17.88	0.44	1532.13
tr|A0A498IWS8|A0A498IWS8_MALDO	DNA replication licensing factor MCM6 OS=Malus domestica OX=3750 GN=DVH24_022010 PE=3 SV=1	15.95	1.58503	97.94	APPPKVEESAAAEPPK			missed K-V@5	-6.44133e-05	1616.84	539.954	1616.84	539.954	3	10	1.1.1.1676.4	11.448	4018.68	925.52	11.57	0.14	79.9222
tr|A0A498IWS8|A0A498IWS8_MALDO	DNA replication licensing factor MCM6 OS=Malus domestica OX=3750 GN=DVH24_022010 PE=3 SV=1	15.95	0.9914	93.97	EIVIEEEK				0.000465422	987.513	494.764	987.512	494.763	2	10	1.1.1.1791.5	14.1449	26615.1	21367.4	14.05	0.26	2486.94
tr|A0A498IWS8|A0A498IWS8_MALDO	DNA replication licensing factor MCM6 OS=Malus domestica OX=3750 GN=DVH24_022010 PE=3 SV=1	15.95	0.8041	88.26	KEQVVVEEKEEDVENPKPTEPDAAAK			missed K-E@1; missed K-E@9	-0.00173193	2907.43	582.494	2907.43	582.494	5	9	1.1.1.1765.11	13.5375	9043.17	732.32	13.02	0.26	250.194
tr|A0A498IWS8|A0A498IWS8_MALDO	DNA replication licensing factor MCM6 OS=Malus domestica OX=3750 GN=DVH24_022010 PE=3 SV=1	15.95	0.319665	68.51	EKEIVIEEEKK			missed K-E@2; missed K-K@10	0.000198236	1372.75	458.589	1372.74	458.589	3	8	1.1.1.1647.2	10.7635	1928.29	797.04	10.87	0.18	235.751
tr|A0A498IWS8|A0A498IWS8_MALDO	DNA replication licensing factor MCM6 OS=Malus domestica OX=3750 GN=DVH24_022010 PE=3 SV=1	15.95	0.166853	99	PPPLPAEAAK			cleaved E-P@N-term	-0.00046731	989.554	495.784	989.555	495.785	2	14	1.1.1.1904.3	16.7487	12517.1	8628.73	16.65	0.28	488.849
tr|A0A498IWS8|A0A498IWS8_MALDO	DNA replication licensing factor MCM6 OS=Malus domestica OX=3750 GN=DVH24_022010 PE=3 SV=1	15.95	0.155523	99	APPPKVEESA			cleaved A-A@C-term; missed K-V@5	-0.00140738	1023.52	512.768	1023.52	512.769	2	10	1.1.1.1621.4	10.2829	13939.2	4599.52	9.99	0.27	271.039
tr|A0A498IWS8|A0A498IWS8_MALDO	DNA replication licensing factor MCM6 OS=Malus domestica OX=3750 GN=DVH24_022010 PE=3 SV=1	15.95	0.102923	29.92	EQVVVEEKEEDVENPKPTEPDAAAK			missed K-E@8	0.00206778	2779.34	695.843	2779.34	695.842	4	8	1.1.1.1794.17	14.2266	48430.8	11281.5	14.05	0.19	568.093
tr|A0A498IWS8|A0A498IWS8_MALDO	DNA replication licensing factor MCM6 OS=Malus domestica OX=3750 GN=DVH24_022010 PE=3 SV=1	15.95	0.0893756	98.63	KYSAAVLK	Carbamyl@N-term		missed K-Y@1	8.78708e-05	921.529	461.772	921.528	461.771	2	11	1.1.1.1778.5	13.8418	179277	11874.9	14.05	0.19	1546.33
tr|A0A498IWS8|A0A498IWS8_MALDO	DNA replication licensing factor MCM6 OS=Malus domestica OX=3750 GN=DVH24_022010 PE=3 SV=1	15.95	0.0824945	29.52	EQVVVEEK				-0.00929756	958.488	480.251	958.497	480.256	2	6	1.1.1.1635.2	10.4715	153.94	41.87	10.65	0.54	61.3335
tr|A0A498IWS8|A0A498IWS8_MALDO	DNA replication licensing factor MCM6 OS=Malus domestica OX=3750 GN=DVH24_022010 PE=3 SV=1	15.95	0.0680339	99	VEESAAAEPPK	Delta:H(4)C(2)@N-term			0.00314093	1154.59	578.3	1154.58	578.298	2	11	1.1.1.1681.6	11.5684	875.19	583.45	11.62	0.14	94.4867
tr|A0A498IWS8|A0A498IWS8_MALDO	DNA replication licensing factor MCM6 OS=Malus domestica OX=3750 GN=DVH24_022010 PE=3 SV=1	15.95	0.0634863	20.11	VEPPPLPAEAAKTEEETSGSVK			missed K-T@12	-6.38555e-05	2265.14	756.053	2265.14	756.053	3	7	1.1.1.1971.8	18.3168	17207.5	4221.89	18.56	0.26	223.238
tr|A0A498IWS8|A0A498IWS8_MALDO	DNA replication licensing factor MCM6 OS=Malus domestica OX=3750 GN=DVH24_022010 PE=3 SV=1	15.95	0.0428718	99	APPPKVEESAAAE			cleaved E-P@C-term; missed K-V@5	-0.00113748	1294.64	648.327	1294.64	648.328	2	11	1.1.1.1656.3	10.974	669.97	427.59	11.08	0.31	64.6819
tr|A0A498IWS8|A0A498IWS8_MALDO	DNA replication licensing factor MCM6 OS=Malus domestica OX=3750 GN=DVH24_022010 PE=3 SV=1	15.95	0.0404816	98.63	APPPKVEESAAA			cleaved A-E@C-term; missed K-V@5	-0.000590768	1165.6	583.806	1165.6	583.806	2	9	1.1.1.1641.3	10.6255	1067.54	584.34	10.7	0.2	65.1817
tr|A0A498IWS8|A0A498IWS8_MALDO	DNA replication licensing factor MCM6 OS=Malus domestica OX=3750 GN=DVH24_022010 PE=3 SV=1	15.95	0.0227338	99	EKEIVIEEEK	Glu->pyro-Glu@N-term; Delta:H(4)C(2)(K)@10		missed K-E@2	-0.00443464	1254.67	628.341	1254.67	628.343	2	11	1.1.1.2048.7	20.137	1607.59	1341.19	20.1	0.4	360.392
tr|A0A498IWS8|A0A498IWS8_MALDO	DNA replication licensing factor MCM6 OS=Malus domestica OX=3750 GN=DVH24_022010 PE=3 SV=1	15.95	0.0190881	99	KEQVVVEEKEE			cleaved E-D@C-term; missed K-E@1; missed K-E@9	-0.00055436	1344.68	449.233	1344.68	449.233	3	9	1.1.1.1601.2	9.98405	476.99	403.73	10.03	0.15	87.9116
tr|A0A498IWS8|A0A498IWS8_MALDO	DNA replication licensing factor MCM6 OS=Malus domestica OX=3750 GN=DVH24_022010 PE=3 SV=1	15.95	0.0168249	30.78	EEDVENPKPTEPDAAAK	Glu->pyro-Glu@N-term			0.00130932	1820.84	607.955	1820.84	607.955	3	7	1.1.1.1717.4	12.4091	5893.84	182.67	12.69	0.19	97.1728
tr|A0A498IWS8|A0A498IWS8_MALDO	DNA replication licensing factor MCM6 OS=Malus domestica OX=3750 GN=DVH24_022010 PE=3 SV=1	15.95	0.015923	96.34	IEFPGSKPVSEA			cleaved A-S@C-term	-6.92823e-05	1259.64	630.827	1259.64	630.827	2	9	1.1.1.1957.8	17.9905	11309.6	4385.5	18.16	0.28	539.704
tr|A0A498IWS8|A0A498IWS8_MALDO	DNA replication licensing factor MCM6 OS=Malus domestica OX=3750 GN=DVH24_022010 PE=3 SV=1	15.95	0.0127808	95.3	VIELYEA			cleaved A-C@C-term	0.000642147	835.433	418.724	835.433	418.724	2	7	1.1.1.2071.2	20.6834	3638.28	2650.7	20.78	0.33	588.998
tr|A0A498IWS8|A0A498IWS8_MALDO	DNA replication licensing factor MCM6 OS=Malus domestica OX=3750 GN=DVH24_022010 PE=3 SV=1	15.95	0.0123337	26.67	EIVIEEEKKEEVVEEK	Glu->pyro-Glu@N-term		missed K-K@8; missed K-E@9	-0.000484286	1940	647.673	1940	647.674	3	8	1.1.1.1958.6	18.0137	8977.64	2025.17	18.23	0.25	609.605
tr|A0A498IWS8|A0A498IWS8_MALDO	DNA replication licensing factor MCM6 OS=Malus domestica OX=3750 GN=DVH24_022010 PE=3 SV=1	15.95	0.0118872	99	KEQVVVEEKEED			cleaved D-V@C-term; missed K-E@1; missed K-E@9	0.00200742	1459.71	487.576	1459.7	487.575	3	8	1.1.1.1614.2	10.1557	462.81	355.94	10.2	0.23	61.2399
tr|A0A498IWS8|A0A498IWS8_MALDO	DNA replication licensing factor MCM6 OS=Malus domestica OX=3750 GN=DVH24_022010 PE=3 SV=1	15.95	0.0043648	96.34	TEEETSGSVK	Delta:H(4)C(2)@N-term			-0.00135622	1093.51	547.764	1093.51	547.764	2	11	1.1.1.1594.2	9.86245	1316.51	1190.86	9.91	0.4	94.1679
tr|A0A498IWS8|A0A498IWS8_MALDO	DNA replication licensing factor MCM6 OS=Malus domestica OX=3750 GN=DVH24_022010 PE=3 SV=1	15.95	0.00174067	83.96	VFETKTSTK	Carbamyl(K)@5		missed K-T@5	-0.00227111	1082.56	542.287	1082.56	542.288	2	8	1.1.1.1652.3	10.8939	18083.5	672.39	11.08	0.17	84.6724
tr|A0A498IWS8|A0A498IWS8_MALDO	DNA replication licensing factor MCM6 OS=Malus domestica OX=3750 GN=DVH24_022010 PE=3 SV=1	15.95	0.000869447	53.98	VEPPPLPAEA			cleaved A-A@C-term	0.00192598	1018.54	510.275	1018.53	510.274	2	7	1.1.1.2001.11	19.015	3835.67	1193.83	19.29	0.33	293.943
tr|A0A498IWS8|A0A498IWS8_MALDO	DNA replication licensing factor MCM6 OS=Malus domestica OX=3750 GN=DVH24_022010 PE=3 SV=1	15.95	0	27.5	APPPKVEE			cleaved E-S@C-term; missed K-V@5	-8.76297e-05	865.454	433.735	865.455	433.735	2	5	1.1.1.1578.2	9.70173	532.09	261.24	9.36	0.47	48.3833
tr|A0A498IWS8|A0A498IWS8_MALDO	DNA replication licensing factor MCM6 OS=Malus domestica OX=3750 GN=DVH24_022010 PE=3 SV=1	15.95	0	25.38	APPPKVEES	Delta:H(4)C(2)(K)@5		cleaved S-A@C-term; missed K-V@5	0.000266834	980.518	491.266	980.518	491.266	2	7	1.1.1.1724.5	12.5627	13085.4	10923.2	12.48	0.23	862.903
tr|A0A498IWS8|A0A498IWS8_MALDO	DNA replication licensing factor MCM6 OS=Malus domestica OX=3750 GN=DVH24_022010 PE=3 SV=1	15.95	0	22.61	APPPKVEES	Dimethyl(K)@5	Dimethyl(K)@1010	cleaved S-A@C-term; missed K-V@5	0.000266834	980.518	491.266	980.518	491.266	2	7	1.1.1.1724.5	12.5627	13085.4	10923.2	12.48	0.23	862.903
tr|A0A498IWS8|A0A498IWS8_MALDO	DNA replication licensing factor MCM6 OS=Malus domestica OX=3750 GN=DVH24_022010 PE=3 SV=1	15.95	0	68.09	APPPKVEESA			cleaved A-A@C-term; missed K-V@5	-0.00140738	1023.52	512.768	1023.52	512.769	2	7	1.1.1.1648.4	10.7961	13939.2	832.34	9.99	0.27	83.5293
tr|A0A498IWS8|A0A498IWS8_MALDO	DNA replication licensing factor MCM6 OS=Malus domestica OX=3750 GN=DVH24_022010 PE=3 SV=1	15.95	0	30.02	APPPKVEESA	Delta:H(4)C(2)(K)@5		cleaved A-A@C-term; missed K-V@5	-0.000611867	1051.55	526.784	1051.55	526.785	2	7	1.1.1.1788.7	14.0806	22721.8	5749.79	13.81	0.24	418.864
tr|A0A498IWS8|A0A498IWS8_MALDO	DNA replication licensing factor MCM6 OS=Malus domestica OX=3750 GN=DVH24_022010 PE=3 SV=1	15.95	0	24.53	APPPKVEESA	Dimethyl(K)@5	Dimethyl(K)@1010	cleaved A-A@C-term; missed K-V@5	-0.000611867	1051.55	526.784	1051.55	526.785	2	7	1.1.1.1788.7	14.0806	22721.8	5749.79	13.81	0.24	418.864
tr|A0A498IWS8|A0A498IWS8_MALDO	DNA replication licensing factor MCM6 OS=Malus domestica OX=3750 GN=DVH24_022010 PE=3 SV=1	15.95	0	21.32	APPPKVEESAA			cleaved A-A@C-term; missed K-V@5	-0.000879283	1094.56	548.287	1094.56	548.288	2	4	1.1.1.1619.2	10.2348	824.79	503.56	10.32	0.26	44.6351
tr|A0A498IWS8|A0A498IWS8_MALDO	DNA replication licensing factor MCM6 OS=Malus domestica OX=3750 GN=DVH24_022010 PE=3 SV=1	15.95	0	99	APPPKVEESAAAEPPKL			missed K-V@5; missed K-L@16	-0.000838805	1729.92	577.649	1729.93	577.649	3	26	1.1.1.1888.5	16.3824	254941	171280	16.23	0.37	12395.5
tr|A0A498IWS8|A0A498IWS8_MALDO	DNA replication licensing factor MCM6 OS=Malus domestica OX=3750 GN=DVH24_022010 PE=3 SV=1	15.95	0	99	APPPKVEESAAAEPPKL			missed K-V@5; missed K-L@16	-0.000838805	1729.92	577.649	1729.93	577.649	3	21	1.1.1.1910.7	16.89	254941	24224.5	16.23	0.37	2010.11
tr|A0A498IWS8|A0A498IWS8_MALDO	DNA replication licensing factor MCM6 OS=Malus domestica OX=3750 GN=DVH24_022010 PE=3 SV=1	15.95	0	99	APPPKVEESAAAEPPKL	Carbamyl(K)@5		missed K-V@5; missed K-L@16	0.00104113	1772.93	591.985	1772.93	591.984	3	15	1.1.1.2009.5	19.2019	12990	2331.32	18.91	0.26	329.607
tr|A0A498IWS8|A0A498IWS8_MALDO	DNA replication licensing factor MCM6 OS=Malus domestica OX=3750 GN=DVH24_022010 PE=3 SV=1	15.95	0	99	APPPKVEESAAAEPPKL	Delta:H(4)C(2)(K)@16		missed K-V@5; missed K-L@16	-0.00106277	1757.96	586.992	1757.96	586.993	3	13	1.1.1.2019.4	19.4319	15914.2	12033	19.36	0.4	1219.65
tr|A0A498IWS8|A0A498IWS8_MALDO	DNA replication licensing factor MCM6 OS=Malus domestica OX=3750 GN=DVH24_022010 PE=3 SV=1	15.95	0	98.99	APPPKVEESAAAEPPKL			missed K-V@5; missed K-L@16	-0.000838805	1729.92	577.649	1729.93	577.649	3	12	1.1.1.1932.14	17.4043	254941	6332.76	16.23	0.37	891.409
tr|A0A498IWS8|A0A498IWS8_MALDO	DNA replication licensing factor MCM6 OS=Malus domestica OX=3750 GN=DVH24_022010 PE=3 SV=1	15.95	0	98.73	APPPKVEESAAAEPPKL			missed K-V@5; missed K-L@16	-0.000838805	1729.92	577.649	1729.93	577.649	3	20	1.1.1.1880.6	16.2045	254941	253321	16.23	0.37	8055.55
tr|A0A498IWS8|A0A498IWS8_MALDO	DNA replication licensing factor MCM6 OS=Malus domestica OX=3750 GN=DVH24_022010 PE=3 SV=1	15.95	0	85.6	APPPKVEESAAAEPPKL			missed K-V@5; missed K-L@16	0.00104845	1729.93	433.489	1729.93	433.489	4	10	1.1.1.1872.3	16.0241	13540.1	5707.91	16.23	0.4	1213.19
tr|A0A498IWS8|A0A498IWS8_MALDO	DNA replication licensing factor MCM6 OS=Malus domestica OX=3750 GN=DVH24_022010 PE=3 SV=1	15.95	0	78.9	APPPKVEESAAAEPPKL	Delta:H(4)C(2)(K)@16		missed K-V@5; missed K-L@16	-0.00296985	1757.95	586.992	1757.96	586.993	3	11	1.1.1.1975.7	18.4011	4902.24	4735.7	18.39	0.21	459.695
tr|A0A498IWS8|A0A498IWS8_MALDO	DNA replication licensing factor MCM6 OS=Malus domestica OX=3750 GN=DVH24_022010 PE=3 SV=1	15.95	0	73.46	APPPKVEESAAAEPPKL	Dimethyl(K)@16	Dimethyl(K)@1021	missed K-V@5; missed K-L@16	-0.00106277	1757.96	586.992	1757.96	586.993	3	13	1.1.1.2019.4	19.4319	15914.2	12033	19.36	0.4	1219.65
tr|A0A498IWS8|A0A498IWS8_MALDO	DNA replication licensing factor MCM6 OS=Malus domestica OX=3750 GN=DVH24_022010 PE=3 SV=1	15.95	0	65.57	APPPKVEESAAAEPPKL			missed K-V@5; missed K-L@16	0.00104845	1729.93	433.489	1729.93	433.489	4	10	1.1.1.1896.2	16.5613	13540.1	3141.2	16.23	0.4	743.422
tr|A0A498IWS8|A0A498IWS8_MALDO	DNA replication licensing factor MCM6 OS=Malus domestica OX=3750 GN=DVH24_022010 PE=3 SV=1	15.95	0	45.31	APPPKVEESAAAEPPKL			missed K-V@5; missed K-L@16	0.00104845	1729.93	433.489	1729.93	433.489	4	9	1.1.1.1868.3	15.9318	13540.1	1031.43	16.23	0.4	991.815
tr|A0A498IWS8|A0A498IWS8_MALDO	DNA replication licensing factor MCM6 OS=Malus domestica OX=3750 GN=DVH24_022010 PE=3 SV=1	15.95	0	35.33	APPPKVEESAAAEPPKL	Dimethyl(K)@16	Dimethyl(K)@1021	missed K-V@5; missed K-L@16	-0.00296985	1757.95	586.992	1757.96	586.993	3	11	1.1.1.1975.7	18.4011	4902.24	4735.7	18.39	0.21	459.695
tr|A0A498IWS8|A0A498IWS8_MALDO	DNA replication licensing factor MCM6 OS=Malus domestica OX=3750 GN=DVH24_022010 PE=3 SV=1	15.95	0	28.88	APPPKVEESAAAEPPKL	Delta:H(2)C(2)(K)@5; Hep(S)@9	Hep(S)@1014	missed K-V@5; missed K-L@16	0.00221585	1948.01	650.343	1948	650.342	3	10	1.1.1.1877.3	16.1531	1708.47	1483.5	16.21	0.19	640.708
tr|A0A498IWS8|A0A498IWS8_MALDO	DNA replication licensing factor MCM6 OS=Malus domestica OX=3750 GN=DVH24_022010 PE=3 SV=1	15.95	0	20.02	APPPKVEESAAAEPPKL	Cation:Na(E)@13		missed K-V@5; missed K-L@16	3.47948e-05	1751.91	584.976	1751.91	584.976	3	6	1.1.1.1875.16	16.1026	1105.82	841.63	16.11	0.26	279.245
tr|A0A498IWS8|A0A498IWS8_MALDO	DNA replication licensing factor MCM6 OS=Malus domestica OX=3750 GN=DVH24_022010 PE=3 SV=1	15.95	0	19.03	APPPKVEESAAAEPPKL	Carbamyl@N-term		missed K-V@5; missed K-L@16	0.00104113	1772.93	591.985	1772.93	591.984	3	14	1.1.1.2009.5	19.2019	12990	2331.32	18.91	0.26	329.607
tr|A0A498IWS8|A0A498IWS8_MALDO	DNA replication licensing factor MCM6 OS=Malus domestica OX=3750 GN=DVH24_022010 PE=3 SV=1	15.95	0	97.9	EEITKEFEEK			missed K-E@5	0.00213136	1280.62	427.879	1280.61	427.878	3	10	1.1.1.1790.3	14.1219	13205.9	4796.82	14.26	0.19	1920.5
tr|A0A498IWS8|A0A498IWS8_MALDO	DNA replication licensing factor MCM6 OS=Malus domestica OX=3750 GN=DVH24_022010 PE=3 SV=1	15.95	0	91.55	EEITKEFEEK			missed K-E@5	-0.000314553	1280.61	641.314	1280.61	641.314	2	9	1.1.1.1788.10	14.0856	5003.22	1104.45	14.23	0.24	185.975
tr|A0A498IWS8|A0A498IWS8_MALDO	DNA replication licensing factor MCM6 OS=Malus domestica OX=3750 GN=DVH24_022010 PE=3 SV=1	15.95	0	17.68	EEVVEEK	Formyl@N-term			0.0382858	888.446	445.23	888.408	445.211	2	6	1.1.1.1677.3	11.4662	1268.54	409.42	11.57	0.17	140.352
tr|A0A498IWS8|A0A498IWS8_MALDO	DNA replication licensing factor MCM6 OS=Malus domestica OX=3750 GN=DVH24_022010 PE=3 SV=1	15.95	0	74.52	EFEEKKAELQAK	Glu->pyro-Glu@N-term; Carbamyl(K)@5		missed K-K@5; missed K-A@6	0.00143849	1473.75	737.881	1473.75	737.88	2	9	1.1.1.1966.7	18.2037	1697.99	1134.31	18.3	0.56	123.773
tr|A0A498IWS8|A0A498IWS8_MALDO	DNA replication licensing factor MCM6 OS=Malus domestica OX=3750 GN=DVH24_022010 PE=3 SV=1	15.95	0	23.02	EIVIEEEK	Delta:H(4)C(2)(K)@8			0.00168717	1015.55	508.78	1015.54	508.779	2	6	1.1.1.1981.4	18.5365	25298	7655.05	18.74	0.33	860.674
tr|A0A498IWS8|A0A498IWS8_MALDO	DNA replication licensing factor MCM6 OS=Malus domestica OX=3750 GN=DVH24_022010 PE=3 SV=1	15.95	0	20.91	EIVIEEEK	Dimethyl(K)@8	Dimethyl(K)@971		0.00168717	1015.55	508.78	1015.54	508.779	2	6	1.1.1.1981.4	18.5365	25298	7655.05	18.74	0.33	860.674
tr|A0A498IWS8|A0A498IWS8_MALDO	DNA replication licensing factor MCM6 OS=Malus domestica OX=3750 GN=DVH24_022010 PE=3 SV=1	15.95	0	16.6	EIVIEEEK	Methyl(E)@5; Methyl(E)@6	Methyl(E)@968; Methyl(E)@969		0.00150407	1015.55	508.78	1015.54	508.779	2	8	1.1.1.1958.2	18.0037	13144.9	12822.6	18	0.44	1174.95
tr|A0A498IWS8|A0A498IWS8_MALDO	DNA replication licensing factor MCM6 OS=Malus domestica OX=3750 GN=DVH24_022010 PE=3 SV=1	15.95	0	27.1	EIVIEEEKK	Delta:H(4)C(2)(K)@9		missed K-K@8	-0.00254353	1143.64	572.825	1143.64	572.827	2	8	1.1.1.1858.5	15.7105	4527.76	2388.04	15.83	0.3	233.121
tr|A0A498IWS8|A0A498IWS8_MALDO	DNA replication licensing factor MCM6 OS=Malus domestica OX=3750 GN=DVH24_022010 PE=3 SV=1	15.95	0	23.59	EIVIEEEKK	Dimethyl(K)@9	Dimethyl(K)@972	missed K-K@8	-0.00254353	1143.64	572.825	1143.64	572.827	2	8	1.1.1.1858.5	15.7105	4527.76	2388.04	15.83	0.3	233.121
tr|A0A498IWS8|A0A498IWS8_MALDO	DNA replication licensing factor MCM6 OS=Malus domestica OX=3750 GN=DVH24_022010 PE=3 SV=1	15.95	0	20.53	EIVIEEEKK	Glu->pyro-Glu@N-term		missed K-K@8	-0.000663119	1097.6	549.805	1097.6	549.806	2	4	1.1.1.1874.8	16.0786	2387.2	635.39	16.28	0.26	110.361
tr|A0A498IWS8|A0A498IWS8_MALDO	DNA replication licensing factor MCM6 OS=Malus domestica OX=3750 GN=DVH24_022010 PE=3 SV=1	15.95	0	23.39	EIVIEEEKKEEVVEEK			missed K-K@8; missed K-E@9	0.000675832	1958.01	490.51	1958.01	490.51	4	7	1.1.1.1815.3	14.714	28085.6	22366.4	14.78	0.29	333.755
tr|A0A498IWS8|A0A498IWS8_MALDO	DNA replication licensing factor MCM6 OS=Malus domestica OX=3750 GN=DVH24_022010 PE=3 SV=1	15.95	0	18.39	EIVIEEEKKEEVVEEK			missed K-K@8; missed K-E@9	0.000675832	1958.01	490.51	1958.01	490.51	4	8	1.1.1.1825.11	14.9352	28085.6	18415.5	14.78	0.29	2211.63
tr|A0A498IWS8|A0A498IWS8_MALDO	DNA replication licensing factor MCM6 OS=Malus domestica OX=3750 GN=DVH24_022010 PE=3 SV=1	15.95	0	16.43	EIVIEEEKKEEVVEEK			missed K-K@8; missed K-E@9	-0.000352221	1958.01	653.677	1958.01	653.677	3	6	1.1.1.1835.9	15.1794	13600.2	1606.06	14.83	0.29	214.42
tr|A0A498IWS8|A0A498IWS8_MALDO	DNA replication licensing factor MCM6 OS=Malus domestica OX=3750 GN=DVH24_022010 PE=3 SV=1	15.95	0	98.55	EKEIVIEEEK			missed K-E@2	-0.000231043	1244.65	623.332	1244.65	623.332	2	10	1.1.1.1727.5	12.6395	3212.2	968.22	12.46	0.21	167.652
tr|A0A498IWS8|A0A498IWS8_MALDO	DNA replication licensing factor MCM6 OS=Malus domestica OX=3750 GN=DVH24_022010 PE=3 SV=1	15.95	0	96.62	EKEIVIEEEK	Methyl(E)@7; Methyl(E)@8	Methyl(E)@968; Methyl(E)@969	missed K-E@2	0.000546941	1272.68	425.235	1272.68	425.234	3	11	1.1.1.1857.2	15.6761	5052.4	4198.64	15.74	0.25	924.724
tr|A0A498IWS8|A0A498IWS8_MALDO	DNA replication licensing factor MCM6 OS=Malus domestica OX=3750 GN=DVH24_022010 PE=3 SV=1	15.95	0	92.19	EKEIVIEEEK	Methyl(E)@7; Methyl(E)@8	Methyl(E)@968; Methyl(E)@969	missed K-E@2	0.000546941	1272.68	425.235	1272.68	425.234	3	11	1.1.1.1856.4	15.6565	5052.4	3720.28	15.74	0.25	847.96
tr|A0A498IWS8|A0A498IWS8_MALDO	DNA replication licensing factor MCM6 OS=Malus domestica OX=3750 GN=DVH24_022010 PE=3 SV=1	15.95	0	73.75	EKEIVIEEEK	Delta:H(4)C(2)(K)@10		missed K-E@2	-0.00162757	1272.68	637.347	1272.68	637.348	2	8	1.1.1.1907.9	16.8257	5221.18	2898.94	16.6	0.32	392.808
tr|A0A498IWS8|A0A498IWS8_MALDO	DNA replication licensing factor MCM6 OS=Malus domestica OX=3750 GN=DVH24_022010 PE=3 SV=1	15.95	0	73.46	EKEIVIEEEK	Glu->pyro-Glu@N-term; Dimethyl(K)@10	Dimethyl(K)@971	missed K-E@2	-0.00443464	1254.67	628.341	1254.67	628.343	2	11	1.1.1.2048.7	20.137	1607.59	1341.19	20.1	0.4	360.392
tr|A0A498IWS8|A0A498IWS8_MALDO	DNA replication licensing factor MCM6 OS=Malus domestica OX=3750 GN=DVH24_022010 PE=3 SV=1	15.95	0	67.25	EKEIVIEEEK	Methyl(E)@7; Methyl(E)@8	Methyl(E)@968; Methyl(E)@969	missed K-E@2	0.000546941	1272.68	425.235	1272.68	425.234	3	11	1.1.1.1855.3	15.6324	5052.4	2923.1	15.74	0.25	730.845
tr|A0A498IWS8|A0A498IWS8_MALDO	DNA replication licensing factor MCM6 OS=Malus domestica OX=3750 GN=DVH24_022010 PE=3 SV=1	15.95	0	35.33	EKEIVIEEEK	Dimethyl(K)@10	Dimethyl(K)@971	missed K-E@2	-0.00162757	1272.68	637.347	1272.68	637.348	2	8	1.1.1.1907.9	16.8257	5221.18	2898.94	16.6	0.32	392.808
tr|A0A498IWS8|A0A498IWS8_MALDO	DNA replication licensing factor MCM6 OS=Malus domestica OX=3750 GN=DVH24_022010 PE=3 SV=1	15.95	0	16.72	EQVVVEEKEED			cleaved D-V@C-term; missed K-E@8	-0.00111134	1331.61	666.811	1331.61	666.812	2	5	1.1.1.1684.10	11.6377	294.42	205.14	11.6	0.17	39.1446
tr|A0A498IWS8|A0A498IWS8_MALDO	DNA replication licensing factor MCM6 OS=Malus domestica OX=3750 GN=DVH24_022010 PE=3 SV=1	15.95	0	17.39	EQVVVEEKEEDVENPKPTEPDAAAK	Formyl(K)@8		missed K-E@8	0.0321765	2807.37	702.849	2807.33	702.841	4	8	1.1.1.1913.5	16.9649	1566.87	1447.48	16.97	0.26	145.013
tr|A0A498IWS8|A0A498IWS8_MALDO	DNA replication licensing factor MCM6 OS=Malus domestica OX=3750 GN=DVH24_022010 PE=3 SV=1	15.95	0	16.43	EQVVVEEKEEDVENPKPTEPDAAAK	Glu->pyro-Glu@N-term; Hydroxymethyl(N)@14; Oxidation(P)@15	Hydroxymethyl(N)@994; Oxidation(P)@995	missed K-E@8	0.0321765	2807.37	702.849	2807.33	702.841	4	9	1.1.1.1913.5	16.9649	1566.87	1447.48	16.97	0.26	145.013
tr|A0A498IWS8|A0A498IWS8_MALDO	DNA replication licensing factor MCM6 OS=Malus domestica OX=3750 GN=DVH24_022010 PE=3 SV=1	15.95	0	16.15	EQVVVEEKEEDVENPKPTEPDAAAK	Delta:H(4)C(2)(K)@8		missed K-E@8	-0.00420897	2807.37	702.849	2807.37	702.85	4	8	1.1.1.1913.5	16.9649	1566.87	1447.48	16.97	0.26	145.013
tr|A0A498IWS8|A0A498IWS8_MALDO	DNA replication licensing factor MCM6 OS=Malus domestica OX=3750 GN=DVH24_022010 PE=3 SV=1	15.95	0	19.16	FDDSKEEITK			cleaved S-F@N-term; missed K-E@5	-0.00482349	1210.57	404.53	1210.57	404.531	3	6	1.1.1.1645.2	10.7146	1774.13	574.88	10.85	0.23	94.8176
tr|A0A498IWS8|A0A498IWS8_MALDO	DNA replication licensing factor MCM6 OS=Malus domestica OX=3750 GN=DVH24_022010 PE=3 SV=1	15.95	0	40.11	FEKVSTFIVIEEK	Cation:Na(E)@2		cleaved V-F@N-term; missed K-V@3	0.0322996	1589.86	795.939	1589.83	795.923	2	6	1.1.1.2090.12	21.1423	147.377	147.377			129.552
tr|A0A498IWS8|A0A498IWS8_MALDO	DNA replication licensing factor MCM6 OS=Malus domestica OX=3750 GN=DVH24_022010 PE=3 SV=1	15.95	0	99	FLEELAK				-5.64548e-05	848.464	425.239	848.464	425.239	2	11	1.1.1.2220.2	24.2605	6554.98	5884.1	24.38	0.84	1336.45
tr|A0A498IWS8|A0A498IWS8_MALDO	DNA replication licensing factor MCM6 OS=Malus domestica OX=3750 GN=DVH24_022010 PE=3 SV=1	15.95	0	99	FLEELAK				-5.64548e-05	848.464	425.239	848.464	425.239	2	10	1.1.1.2241.2	24.7707	6554.98	3989.86	24.38	0.84	1043.49
tr|A0A498IWS8|A0A498IWS8_MALDO	DNA replication licensing factor MCM6 OS=Malus domestica OX=3750 GN=DVH24_022010 PE=3 SV=1	15.95	0	99	FLEELAK				0.000187687	848.465	425.24	848.464	425.239	2	8	1.1.1.2262.2	25.2843	4202.73	3596.16	25.23	0.32	964.874
tr|A0A498IWS8|A0A498IWS8_MALDO	DNA replication licensing factor MCM6 OS=Malus domestica OX=3750 GN=DVH24_022010 PE=3 SV=1	15.95	0	99	FLEELAK				-5.64548e-05	848.464	425.239	848.464	425.239	2	9	1.1.1.2304.3	26.3063	3520.98	3214.72	26.13	0.58	999.908
tr|A0A498IWS8|A0A498IWS8_MALDO	DNA replication licensing factor MCM6 OS=Malus domestica OX=3750 GN=DVH24_022010 PE=3 SV=1	15.95	0	99	FLEELAK				-0.000239561	848.464	425.239	848.464	425.239	2	8	1.1.1.3203.2	36.2968	515.05	419.7	36.5	0.42	101.558
tr|A0A498IWS8|A0A498IWS8_MALDO	DNA replication licensing factor MCM6 OS=Malus domestica OX=3750 GN=DVH24_022010 PE=3 SV=1	15.95	0	99	FLEELAK				-0.000422667	848.464	425.239	848.464	425.239	2	9	1.1.1.3576.2	38.8122	1675.57	1641.01	38.9	0.84	329.303
tr|A0A498IWS8|A0A498IWS8_MALDO	DNA replication licensing factor MCM6 OS=Malus domestica OX=3750 GN=DVH24_022010 PE=3 SV=1	15.95	0	99	FLEELAK				-0.000239561	848.464	425.239	848.464	425.239	2	11	1.1.1.3651.2	39.311	1745.71	1678.22	39.33	0.52	324.202
tr|A0A498IWS8|A0A498IWS8_MALDO	DNA replication licensing factor MCM6 OS=Malus domestica OX=3750 GN=DVH24_022010 PE=3 SV=1	15.95	0	99	FLEELAK				-0.000239561	848.464	425.239	848.464	425.239	2	11	1.1.1.3729.2	39.8142	1594.79	1558.6	39.6	0.49	308.61
tr|A0A498IWS8|A0A498IWS8_MALDO	DNA replication licensing factor MCM6 OS=Malus domestica OX=3750 GN=DVH24_022010 PE=3 SV=1	15.95	0	99	FLEELAK				-5.64548e-05	848.464	425.239	848.464	425.239	2	10	1.1.1.3891.2	40.8224	1453.37	1057.27	40.38	0.67	192.115
tr|A0A498IWS8|A0A498IWS8_MALDO	DNA replication licensing factor MCM6 OS=Malus domestica OX=3750 GN=DVH24_022010 PE=3 SV=1	15.95	0	99	FLEELAK				-0.000127003	848.464	425.239	848.464	425.239	2	11	1.1.1.2064.2	20.5146	17375.6	13169.1	20.2	0.67	2423.88
tr|A0A498IWS8|A0A498IWS8_MALDO	DNA replication licensing factor MCM6 OS=Malus domestica OX=3750 GN=DVH24_022010 PE=3 SV=1	15.95	0	99	FLEELAK				5.61029e-05	848.464	425.24	848.464	425.239	2	10	1.1.1.2108.4	21.5527	9658.81	8526.54	21.71	0.52	1621.28
tr|A0A498IWS8|A0A498IWS8_MALDO	DNA replication licensing factor MCM6 OS=Malus domestica OX=3750 GN=DVH24_022010 PE=3 SV=1	15.95	0	99	FLEELAK				-0.000127003	848.464	425.239	848.464	425.239	2	10	1.1.1.2129.3	22.0573	9658.81	7573.81	21.86	0.41	1559.54
tr|A0A498IWS8|A0A498IWS8_MALDO	DNA replication licensing factor MCM6 OS=Malus domestica OX=3750 GN=DVH24_022010 PE=3 SV=1	15.95	0	99	FLEELAK				5.61029e-05	848.464	425.24	848.464	425.239	2	10	1.1.1.2043.2	20.0097	24430.6	17079.4	19.6	0.65	2846.5
tr|A0A498IWS8|A0A498IWS8_MALDO	DNA replication licensing factor MCM6 OS=Malus domestica OX=3750 GN=DVH24_022010 PE=3 SV=1	15.95	0	99	FLEELAK				-0.000310109	848.464	425.239	848.464	425.239	2	9	1.1.1.2171.4	23.0795	6709.83	5142.95	22.51	0.8	1234.2
tr|A0A498IWS8|A0A498IWS8_MALDO	DNA replication licensing factor MCM6 OS=Malus domestica OX=3750 GN=DVH24_022010 PE=3 SV=1	15.95	0	96.49	FLEELAK				-0.000310109	848.464	425.239	848.464	425.239	2	9	1.1.1.2150.4	22.5684	6709.83	6682.21	22.51	0.8	1514.36
tr|A0A498IWS8|A0A498IWS8_MALDO	DNA replication licensing factor MCM6 OS=Malus domestica OX=3750 GN=DVH24_022010 PE=3 SV=1	15.95	0	93.73	FLEELAK				-0.000310109	848.464	425.239	848.464	425.239	2	8	1.1.1.2086.2	21.0361	10172	9111.89	20.99	0.49	1679.95
tr|A0A498IWS8|A0A498IWS8_MALDO	DNA replication licensing factor MCM6 OS=Malus domestica OX=3750 GN=DVH24_022010 PE=3 SV=1	15.95	0	93.73	FLEELAK				-0.000554251	848.464	425.239	848.464	425.239	2	8	1.1.1.2199.4	23.7593	5264.02	5201.45	23.73	0.32	1232.6
tr|A0A498IWS8|A0A498IWS8_MALDO	DNA replication licensing factor MCM6 OS=Malus domestica OX=3750 GN=DVH24_022010 PE=3 SV=1	15.95	0	99	FLEELAKIEFPG			cleaved G-S@C-term; missed K-I@7	-0.000308841	1391.73	696.874	1391.73	696.874	2	6	1.1.1.2369.8	27.8829	1868.17	513.55	28.19	0.42	85.7725
tr|A0A498IWS8|A0A498IWS8_MALDO	DNA replication licensing factor MCM6 OS=Malus domestica OX=3750 GN=DVH24_022010 PE=3 SV=1	15.95	0	42.29	IEFPGSK	Delta:H(4)C(2)@N-term		cleaved K-P@C-term	0.00269179	804.441	403.228	804.438	403.226	2	8	1.1.1.1937.2	17.5132	93394.3	31680.2	17.32	0.26	4527.53
tr|A0A498IWS8|A0A498IWS8_MALDO	DNA replication licensing factor MCM6 OS=Malus domestica OX=3750 GN=DVH24_022010 PE=3 SV=1	15.95	0	17.53	IEFPGSK	Delta:H(4)C(2)@N-term		cleaved K-P@C-term	0.00269179	804.441	403.228	804.438	403.226	2	6	1.1.1.1915.2	17.0031	93394.3	926.96	17.32	0.26	257.546
tr|A0A498IWS8|A0A498IWS8_MALDO	DNA replication licensing factor MCM6 OS=Malus domestica OX=3750 GN=DVH24_022010 PE=3 SV=1	15.95	0	15.33	IEFPGSK	Delta:H(4)C(2)@N-term		cleaved K-P@C-term	0.00269179	804.441	403.228	804.438	403.226	2	7	1.1.1.1924.2	17.2093	93394.3	54474.5	17.32	0.26	3341.47
tr|A0A498IWS8|A0A498IWS8_MALDO	DNA replication licensing factor MCM6 OS=Malus domestica OX=3750 GN=DVH24_022010 PE=3 SV=1	15.95	0	35.33	IEFPGSKPV			cleaved V-S@C-term	0.000867526	972.529	487.272	972.528	487.271	2	6	1.1.1.1967.5	18.217	1485.53	897.35	18.26	0.49	385.63
tr|A0A498IWS8|A0A498IWS8_MALDO	DNA replication licensing factor MCM6 OS=Malus domestica OX=3750 GN=DVH24_022010 PE=3 SV=1	15.95	0	73.46	IEFPGSKPVSEA	Delta:H(4)C(2)(K)@7		cleaved A-S@C-term	-0.000738954	1287.67	644.842	1287.67	644.843	2	7	1.1.1.2063.8	20.4953	2497.5	2375.69	20.46	0.27	341.021
tr|A0A498IWS8|A0A498IWS8_MALDO	DNA replication licensing factor MCM6 OS=Malus domestica OX=3750 GN=DVH24_022010 PE=3 SV=1	15.95	0	53.98	IEFPGSKPVSEA	Dimethyl(K)@7	Dimethyl(K)@905	cleaved A-S@C-term	-0.000738954	1287.67	644.842	1287.67	644.843	2	7	1.1.1.2063.8	20.4953	2497.5	2375.69	20.46	0.27	341.021
tr|A0A498IWS8|A0A498IWS8_MALDO	DNA replication licensing factor MCM6 OS=Malus domestica OX=3750 GN=DVH24_022010 PE=3 SV=1	15.95	0	99	IEFPGSKPVSEASSK				0.000590479	1561.8	521.607	1561.8	521.607	3	14	1.1.1.1855.6	15.6398	630652	630520	15.63	0.32	1011.91
tr|A0A498IWS8|A0A498IWS8_MALDO	DNA replication licensing factor MCM6 OS=Malus domestica OX=3750 GN=DVH24_022010 PE=3 SV=1	15.95	0	99	IEFPGSKPVSEASSK				0.000590479	1561.8	521.607	1561.8	521.607	3	13	1.1.1.1886.4	16.3435	630652	6212.64	15.63	0.32	922.68
tr|A0A498IWS8|A0A498IWS8_MALDO	DNA replication licensing factor MCM6 OS=Malus domestica OX=3750 GN=DVH24_022010 PE=3 SV=1	15.95	0	99	IEFPGSKPVSEASSK				-0.000677695	1561.8	781.906	1561.8	781.907	2	13	1.1.1.1841.4	15.3202	151640	2564.25	15.6	0.28	199.724
tr|A0A498IWS8|A0A498IWS8_MALDO	DNA replication licensing factor MCM6 OS=Malus domestica OX=3750 GN=DVH24_022010 PE=3 SV=1	15.95	0	97.54	IEFPGSKPVSEASSK	Delta:H(4)C(2)@N-term			-0.000994034	1589.83	530.95	1589.83	530.951	3	12	1.1.1.1903.2	16.727	28383.9	6618.24	16.95	0.35	595.674
tr|A0A498IWS8|A0A498IWS8_MALDO	DNA replication licensing factor MCM6 OS=Malus domestica OX=3750 GN=DVH24_022010 PE=3 SV=1	15.95	0	97.34	IEFPGSKPVSEASSK	Methyl(S)@10; Methyl(E)@11	Methyl(S)@908; Methyl(E)@909		-0.000444715	1589.83	530.951	1589.83	530.951	3	14	1.1.1.1952.2	17.8671	91481	8586.42	18.09	0.21	711.487
tr|A0A498IWS8|A0A498IWS8_MALDO	DNA replication licensing factor MCM6 OS=Malus domestica OX=3750 GN=DVH24_022010 PE=3 SV=1	15.95	0	91.21	IEFPGSKPVSEASSK				0.000590479	1561.8	521.607	1561.8	521.607	3	19	1.1.1.1850.5	15.519	630652	413231	15.63	0.32	53990.8
tr|A0A498IWS8|A0A498IWS8_MALDO	DNA replication licensing factor MCM6 OS=Malus domestica OX=3750 GN=DVH24_022010 PE=3 SV=1	15.95	0	88.48	IEFPGSKPVSEASSK				0.000590479	1561.8	521.607	1561.8	521.607	3	7	1.1.1.1921.3	17.141	2557.76	1872.79	16.9	0.44	1641.68
tr|A0A498IWS8|A0A498IWS8_MALDO	DNA replication licensing factor MCM6 OS=Malus domestica OX=3750 GN=DVH24_022010 PE=3 SV=1	15.95	0	68.09	IEFPGSKPVSEASSK	Delta:H(4)C(2)(K)@15			-0.000444715	1589.83	530.951	1589.83	530.951	3	11	1.1.1.1952.2	17.8671	91481	8586.42	18.09	0.21	711.487
tr|A0A498IWS8|A0A498IWS8_MALDO	DNA replication licensing factor MCM6 OS=Malus domestica OX=3750 GN=DVH24_022010 PE=3 SV=1	15.95	0	39.14	IEFPGSKPVSEASSK	Delta:H(4)C(2)@N-term			-0.000994034	1589.83	530.95	1589.83	530.951	3	10	1.1.1.1922.4	17.1685	28383.9	14403.1	16.95	0.35	810.709
tr|A0A498IWS8|A0A498IWS8_MALDO	DNA replication licensing factor MCM6 OS=Malus domestica OX=3750 GN=DVH24_022010 PE=3 SV=1	15.95	0	34.61	IEFPGSKPVSEASSK	Dimethyl(K)@15	Dimethyl(K)@913		-0.000444715	1589.83	530.951	1589.83	530.951	3	11	1.1.1.1952.2	17.8671	91481	8586.42	18.09	0.21	711.487
tr|A0A498IWS8|A0A498IWS8_MALDO	DNA replication licensing factor MCM6 OS=Malus domestica OX=3750 GN=DVH24_022010 PE=3 SV=1	15.95	0	98.63	IKKVFETK	Carbamyl@N-term; Carbamyl(K)@3		missed K-K@2; missed K-V@3	-0.000908684	1077.62	539.816	1077.62	539.816	2	12	1.1.1.1892.2	16.473	11779.1	7995.54	16.35	0.25	703.228
tr|A0A498IWS8|A0A498IWS8_MALDO	DNA replication licensing factor MCM6 OS=Malus domestica OX=3750 GN=DVH24_022010 PE=3 SV=1	15.95	0	24.3	IKKVFETK	Carbamyl(K)@2; Carbamyl(K)@3		missed K-K@2; missed K-V@3	-0.000908684	1077.62	539.816	1077.62	539.816	2	12	1.1.1.1892.2	16.473	11779.1	7995.54	16.35	0.25	703.228
tr|A0A498IWS8|A0A498IWS8_MALDO	DNA replication licensing factor MCM6 OS=Malus domestica OX=3750 GN=DVH24_022010 PE=3 SV=1	15.95	0	60.5	KEQVVVEEKEEDVENPKPTEPDAAAK	Carbamyl(K)@17		missed K-E@1; missed K-E@9	0.00164319	2950.44	738.618	2950.44	738.617	4	8	1.1.1.1797.14	14.2989	2186.51	626.77	14.47	0.22	80.475
tr|A0A498IWS8|A0A498IWS8_MALDO	DNA replication licensing factor MCM6 OS=Malus domestica OX=3750 GN=DVH24_022010 PE=3 SV=1	15.95	0	28.88	KEQVVVEEKEEDVENPKPTEPDAAAK			missed K-E@1; missed K-E@9	-0.00444943	2907.43	727.865	2907.43	727.866	4	7	1.1.1.1737.6	12.8759	7746.13	3138.32	13.02	0.26	111.229
tr|A0A498IWS8|A0A498IWS8_MALDO	DNA replication licensing factor MCM6 OS=Malus domestica OX=3750 GN=DVH24_022010 PE=3 SV=1	15.95	0	25.66	KYSAAVLK	Carbamyl@N-term		missed K-Y@1	8.78708e-05	921.529	461.772	921.528	461.771	2	6	1.1.1.1800.5	14.357	179277	3546.64	14.05	0.19	617.056
tr|A0A498IWS8|A0A498IWS8_MALDO	DNA replication licensing factor MCM6 OS=Malus domestica OX=3750 GN=DVH24_022010 PE=3 SV=1	15.95	0	24.3	KYSAAVLK	Carbamyl(K)@1		missed K-Y@1	8.78708e-05	921.529	461.772	921.528	461.771	2	11	1.1.1.1778.5	13.8418	179277	11874.9	14.05	0.19	1546.33
tr|A0A498IWS8|A0A498IWS8_MALDO	DNA replication licensing factor MCM6 OS=Malus domestica OX=3750 GN=DVH24_022010 PE=3 SV=1	15.95	0	19.16	KYSAAVLK	Carbamyl(K)@1		missed K-Y@1	8.78708e-05	921.529	461.772	921.528	461.771	2	6	1.1.1.1800.5	14.357	179277	3546.64	14.05	0.19	617.056
tr|A0A498IWS8|A0A498IWS8_MALDO	DNA replication licensing factor MCM6 OS=Malus domestica OX=3750 GN=DVH24_022010 PE=3 SV=1	15.95	0	18.91	PTEPDAAAKAPPPK	Oxidation(P)@4	Oxidation(P)@1000	cleaved K-P@N-term; missed K-A@9	-0.0256913	1404.7	469.24	1404.72	469.249	3	7	1.1.1.1689.3	11.7484	703.82	229.83	11.85	0.37	164.931
tr|A0A498IWS8|A0A498IWS8_MALDO	DNA replication licensing factor MCM6 OS=Malus domestica OX=3750 GN=DVH24_022010 PE=3 SV=1	15.95	0	18.23	PTEPDAAAKAPPPK	Carbamyl(K)@9		cleaved K-P@N-term; missed K-A@9	-0.0110069	1431.72	716.87	1431.74	716.875	2	7	1.1.1.1823.11	14.8948	797.58	676.45	14.85	0.67	79.0257
tr|A0A498IWS8|A0A498IWS8_MALDO	DNA replication licensing factor MCM6 OS=Malus domestica OX=3750 GN=DVH24_022010 PE=3 SV=1	15.95	0	72.17	SFDDSKEEITK	Carbamyl(K)@6		missed K-E@6	0.031288	1340.64	447.888	1340.61	447.877	3	9	1.1.1.1833.3	15.1216	2868.85	1677.69	15.19	0.26	921.181
tr|A0A498IWS8|A0A498IWS8_MALDO	DNA replication licensing factor MCM6 OS=Malus domestica OX=3750 GN=DVH24_022010 PE=3 SV=1	15.95	0	65.57	SFDDSKEEITK			missed K-E@6	-0.00136425	1297.6	433.541	1297.6	433.542	3	9	1.1.1.1745.2	13.0501	553.99	502.27	13.07	0.62	238.212
tr|A0A498IWS8|A0A498IWS8_MALDO	DNA replication licensing factor MCM6 OS=Malus domestica OX=3750 GN=DVH24_022010 PE=3 SV=1	15.95	0	22.78	SFDDSKEEITK			missed K-E@6	-0.000814928	1297.6	433.542	1297.6	433.542	3	7	1.1.1.1657.3	10.9984	3764.64	677.02	11.17	0.19	159.387
tr|A0A498IWS8|A0A498IWS8_MALDO	DNA replication licensing factor MCM6 OS=Malus domestica OX=3750 GN=DVH24_022010 PE=3 SV=1	15.95	0	19.5	SFDDSKEEITK			missed K-E@6	0.0028472	1297.61	433.543	1297.6	433.542	3	6	1.1.1.1679.2	11.5077	185277	2101.25	11.74	0.18	209.676
tr|A0A498IWS8|A0A498IWS8_MALDO	DNA replication licensing factor MCM6 OS=Malus domestica OX=3750 GN=DVH24_022010 PE=3 SV=1	15.95	0	91.68	SFDDSKEEITKEFEEK			missed K-E@6; missed K-E@11	0.00519936	1959.9	654.307	1959.89	654.306	3	10	1.1.1.2031.11	19.728	22154.1	1764.36	19.24	0.26	1718.37
tr|A0A498IWS8|A0A498IWS8_MALDO	DNA replication licensing factor MCM6 OS=Malus domestica OX=3750 GN=DVH24_022010 PE=3 SV=1	15.95	0	53.98	SFDDSKEEITKEFEEK			missed K-E@6; missed K-E@11	0.00160222	1959.9	490.981	1959.89	490.981	4	7	1.1.1.2024.7	19.5544	32205.8	3924.79	19.08	0.35	519.386
tr|A0A498IWS8|A0A498IWS8_MALDO	DNA replication licensing factor MCM6 OS=Malus domestica OX=3750 GN=DVH24_022010 PE=3 SV=1	15.95	0	18.66	TEEETSGSVK	Delta:H(4)C(2)@N-term			-0.00208865	1093.51	547.763	1093.51	547.764	2	5	1.1.1.1548.2	9.3581	387.77	283.21	9.4	0.2	27.2434
tr|A0A498IWS8|A0A498IWS8_MALDO	DNA replication licensing factor MCM6 OS=Malus domestica OX=3750 GN=DVH24_022010 PE=3 SV=1	15.95	0	99	VEESAAAEPPKL			missed K-L@11	-0.00153804	1239.63	620.824	1239.63	620.825	2	18	1.1.1.1838.3	15.2454	43716.1	1658.43	15.56	0.28	197.425
tr|A0A498IWS8|A0A498IWS8_MALDO	DNA replication licensing factor MCM6 OS=Malus domestica OX=3750 GN=DVH24_022010 PE=3 SV=1	15.95	0	99	VEESAAAEPPKL	Delta:H(4)C(2)@N-term; Delta:H(4)C(2)(K)@11		missed K-L@11	-0.00141077	1295.7	648.855	1295.7	648.856	2	15	1.1.1.2091.3	21.1566	4009.12	3335.33	21.2	0.37	490.861
tr|A0A498IWS8|A0A498IWS8_MALDO	DNA replication licensing factor MCM6 OS=Malus domestica OX=3750 GN=DVH24_022010 PE=3 SV=1	15.95	0	99	VEESAAAEPPKL	Delta:H(4)C(2)(K)@11		missed K-L@11	0.000120895	1267.67	634.84	1267.67	634.84	2	11	1.1.1.2041.12	19.9705	4518.86	1733.1	19.77	0.36	313.884
tr|A0A498IWS8|A0A498IWS8_MALDO	DNA replication licensing factor MCM6 OS=Malus domestica OX=3750 GN=DVH24_022010 PE=3 SV=1	15.95	0	99	VEESAAAEPPKL	Delta:H(4)C(2)@N-term		missed K-L@11	0.000483316	1267.67	634.841	1267.67	634.84	2	16	1.1.1.1930.11	17.3584	80557.1	2527.21	17.61	0.26	375.333
tr|A0A498IWS8|A0A498IWS8_MALDO	DNA replication licensing factor MCM6 OS=Malus domestica OX=3750 GN=DVH24_022010 PE=3 SV=1	15.95	0	99	VEESAAAEPPKL	Delta:H(4)C(2)@N-term		missed K-L@11	0.000483316	1267.67	634.841	1267.67	634.84	2	18	1.1.1.1952.3	17.8713	80557.1	21325.1	17.61	0.26	2487.09
tr|A0A498IWS8|A0A498IWS8_MALDO	DNA replication licensing factor MCM6 OS=Malus domestica OX=3750 GN=DVH24_022010 PE=3 SV=1	15.95	0	99	VEESAAAEPPKL	Delta:H(4)C(2)@N-term		missed K-L@11	0.000849529	1267.67	634.841	1267.67	634.84	2	15	1.1.1.1997.11	18.9196	30757.8	15049.3	18.77	0.26	1684.57
tr|A0A498IWS8|A0A498IWS8_MALDO	DNA replication licensing factor MCM6 OS=Malus domestica OX=3750 GN=DVH24_022010 PE=3 SV=1	15.95	0	95.94	VEESAAAEPPKL	Delta:H(4)C(2)@N-term; Delta:H(4)C(2)(K)@11		missed K-L@11	0.000542363	1295.7	648.856	1295.7	648.856	2	10	1.1.1.2020.12	19.4622	2750.39	2636.74	19.47	0.38	415.535
tr|A0A498IWS8|A0A498IWS8_MALDO	DNA replication licensing factor MCM6 OS=Malus domestica OX=3750 GN=DVH24_022010 PE=3 SV=1	15.95	0	85.6	VEESAAAEPPKL			missed K-L@11	0.0062745	1239.64	620.828	1239.63	620.825	2	9	1.1.1.1896.3	16.5654	1890.31	1015.28	16.63	0.19	167.845
tr|A0A498IWS8|A0A498IWS8_MALDO	DNA replication licensing factor MCM6 OS=Malus domestica OX=3750 GN=DVH24_022010 PE=3 SV=1	15.95	0	73.46	VEESAAAEPPKL	Dimethyl(K)@11	Dimethyl(K)@1021	missed K-L@11	0.000120895	1267.67	634.84	1267.67	634.84	2	11	1.1.1.2041.12	19.9705	4518.86	1733.1	19.77	0.36	313.884
tr|A0A498IWS8|A0A498IWS8_MALDO	DNA replication licensing factor MCM6 OS=Malus domestica OX=3750 GN=DVH24_022010 PE=3 SV=1	15.95	0	73.46	VEESAAAEPPKL	Formyl@N-term; Delta:H(4)C(2)(K)@11		missed K-L@11	0.0313126	1295.69	648.853	1295.66	648.838	2	8	1.1.1.2135.11	22.2092	1666.96	1125.81	21.98	0.53	238.369
tr|A0A498IWS8|A0A498IWS8_MALDO	DNA replication licensing factor MCM6 OS=Malus domestica OX=3750 GN=DVH24_022010 PE=3 SV=1	15.95	0	53.98	VEESAAAEPPKL	Formyl@N-term; Dimethyl(K)@11	Dimethyl(K)@1021	missed K-L@11	0.0313126	1295.69	648.853	1295.66	648.838	2	8	1.1.1.2135.11	22.2092	1666.96	1125.81	21.98	0.53	238.369
tr|A0A498IWS8|A0A498IWS8_MALDO	DNA replication licensing factor MCM6 OS=Malus domestica OX=3750 GN=DVH24_022010 PE=3 SV=1	15.95	0	35.33	VEESAAAEPPKL	Delta:H(4)C(2)@N-term		missed K-L@11	0.000483316	1267.67	634.841	1267.67	634.84	2	8	1.1.1.1975.8	18.4027	80557.1	1821.32	17.61	0.26	330.306
tr|A0A498IWS8|A0A498IWS8_MALDO	DNA replication licensing factor MCM6 OS=Malus domestica OX=3750 GN=DVH24_022010 PE=3 SV=1	15.95	0	22.61	VEESAAAEPPKL	Methyl(E)@2; Methyl(E)@3	Methyl(E)@1012; Methyl(E)@1013	missed K-L@11	0.000849529	1267.67	634.841	1267.67	634.84	2	16	1.1.1.1997.11	18.9196	30757.8	15049.3	18.77	0.26	1684.57
tr|A0A498IWS8|A0A498IWS8_MALDO	DNA replication licensing factor MCM6 OS=Malus domestica OX=3750 GN=DVH24_022010 PE=3 SV=1	15.95	0	17.21	VEESAAAEPPKL	Methyl(E)@3; Methyl(S)@4	Methyl(E)@1013; Methyl(S)@1014	missed K-L@11	0.000849529	1267.67	634.841	1267.67	634.84	2	16	1.1.1.1997.11	18.9196	30757.8	15049.3	18.77	0.26	1684.57
tr|A0A498IWS8|A0A498IWS8_MALDO	DNA replication licensing factor MCM6 OS=Malus domestica OX=3750 GN=DVH24_022010 PE=3 SV=1	15.95	0	83.38	VEPPPLPAE			cleaved E-A@C-term	0.00420469	947.501	474.758	947.496	474.755	2	8	1.1.1.1975.5	18.3977	2689.99	1871.13	18.56	0.35	434.317
tr|A0A498IWS8|A0A498IWS8_MALDO	DNA replication licensing factor MCM6 OS=Malus domestica OX=3750 GN=DVH24_022010 PE=3 SV=1	15.95	0	99	VEPPPLPAEAAK				-0.00214108	1217.66	609.839	1217.67	609.84	2	12	1.1.1.1923.7	17.1959	1185126	13745.9	16.65	0.3	1279.99
tr|A0A498IWS8|A0A498IWS8_MALDO	DNA replication licensing factor MCM6 OS=Malus domestica OX=3750 GN=DVH24_022010 PE=3 SV=1	15.95	0	99	VEPPPLPAEAAK				0.00118546	1217.67	406.896	1217.67	406.896	3	12	1.1.1.1862.3	15.7965	66722.8	433.62	16.67	0.3	328.276
tr|A0A498IWS8|A0A498IWS8_MALDO	DNA replication licensing factor MCM6 OS=Malus domestica OX=3750 GN=DVH24_022010 PE=3 SV=1	15.95	0	99	VEPPPLPAEAAK	Delta:H(4)C(2)@N-term			-0.000120186	1245.7	623.856	1245.7	623.856	2	14	1.1.1.1988.11	18.7063	213209	165282	18.56	0.54	13390.6
tr|A0A498IWS8|A0A498IWS8_MALDO	DNA replication licensing factor MCM6 OS=Malus domestica OX=3750 GN=DVH24_022010 PE=3 SV=1	15.95	0	99	VEPPPLPAEAAK	Delta:H(4)C(2)(K)@12			-0.00120436	1245.7	623.855	1245.7	623.856	2	10	1.1.1.2052.6	20.2262	136532	22488.2	19.98	0.31	2100.78
tr|A0A498IWS8|A0A498IWS8_MALDO	DNA replication licensing factor MCM6 OS=Malus domestica OX=3750 GN=DVH24_022010 PE=3 SV=1	15.95	0	99	VEPPPLPAEAAK				-0.00214108	1217.66	609.839	1217.67	609.84	2	19	1.1.1.1901.4	16.6847	1185126	1177255	16.65	0.3	66727.4
tr|A0A498IWS8|A0A498IWS8_MALDO	DNA replication licensing factor MCM6 OS=Malus domestica OX=3750 GN=DVH24_022010 PE=3 SV=1	15.95	0	99	VEPPPLPAEAAK	Delta:H(4)C(2)(K)@12			-0.00120436	1245.7	623.855	1245.7	623.856	2	12	1.1.1.2031.8	19.7255	136532	48624.8	19.98	0.31	4399.84
tr|A0A498IWS8|A0A498IWS8_MALDO	DNA replication licensing factor MCM6 OS=Malus domestica OX=3750 GN=DVH24_022010 PE=3 SV=1	15.95	0	83.96	VEPPPLPAEAAK				-0.00214108	1217.66	609.839	1217.67	609.84	2	7	1.1.1.1856.9	15.6656	1185126	1911.06	16.65	0.3	299.652
tr|A0A498IWS8|A0A498IWS8_MALDO	DNA replication licensing factor MCM6 OS=Malus domestica OX=3750 GN=DVH24_022010 PE=3 SV=1	15.95	0	83.38	VEPPPLPAEAAK				-0.00055416	1217.67	609.84	1217.67	609.84	2	7	1.1.1.1971.5	18.3093	2715.85	1585.88	18.05	0.51	258.341
tr|A0A498IWS8|A0A498IWS8_MALDO	DNA replication licensing factor MCM6 OS=Malus domestica OX=3750 GN=DVH24_022010 PE=3 SV=1	15.95	0	80.91	VEPPPLPAEAAK				-0.00214108	1217.66	609.839	1217.67	609.84	2	7	1.1.1.1949.4	17.8013	1185126	3395.86	16.65	0.3	418.345
tr|A0A498IWS8|A0A498IWS8_MALDO	DNA replication licensing factor MCM6 OS=Malus domestica OX=3750 GN=DVH24_022010 PE=3 SV=1	15.95	0	78.2	VEPPPLPAEAAK				0.00301652	1217.67	406.897	1217.67	406.896	3	7	1.1.1.1934.2	17.4418	594.05	524.53	17.42	0.26	606.99
tr|A0A498IWS8|A0A498IWS8_MALDO	DNA replication licensing factor MCM6 OS=Malus domestica OX=3750 GN=DVH24_022010 PE=3 SV=1	15.95	0	71.24	VEPPPLPAEAAK	Dimethyl(K)@12	Dimethyl(K)@951		-0.00120436	1245.7	623.855	1245.7	623.856	2	12	1.1.1.2031.8	19.7255	136532	48624.8	19.98	0.31	4399.84
tr|A0A498IWS8|A0A498IWS8_MALDO	DNA replication licensing factor MCM6 OS=Malus domestica OX=3750 GN=DVH24_022010 PE=3 SV=1	15.95	0	71.24	VEPPPLPAEAAK	Dimethyl(K)@12	Dimethyl(K)@951		-0.00120436	1245.7	623.855	1245.7	623.856	2	10	1.1.1.2052.6	20.2262	136532	22488.2	19.98	0.31	2100.78
tr|A0A498IWS8|A0A498IWS8_MALDO	DNA replication licensing factor MCM6 OS=Malus domestica OX=3750 GN=DVH24_022010 PE=3 SV=1	15.95	0	65.57	VEPPPLPAEAAK				-0.00214108	1217.66	609.839	1217.67	609.84	2	13	1.1.1.1899.4	16.6338	1185126	1146195	16.65	0.3	15176.5
tr|A0A498IWS8|A0A498IWS8_MALDO	DNA replication licensing factor MCM6 OS=Malus domestica OX=3750 GN=DVH24_022010 PE=3 SV=1	15.95	0	41.93	VEPPPLPAEAAK				-0.010902	1217.65	609.835	1217.67	609.84	2	5	1.1.1.2026.11	19.6066	2175.17	1085.87	19.36	0.52	260.309
tr|A0A498IWS8|A0A498IWS8_MALDO	DNA replication licensing factor MCM6 OS=Malus domestica OX=3750 GN=DVH24_022010 PE=3 SV=1	15.95	0	25.66	VEPPPLPAEAAK	Carbamidomethyl@N-term			-0.00615248	1274.68	638.348	1274.69	638.351	2	6	1.1.1.1905.5	16.7785	2454.19	2309.93	16.79	0.37	387.947
tr|A0A498IWS8|A0A498IWS8_MALDO	DNA replication licensing factor MCM6 OS=Malus domestica OX=3750 GN=DVH24_022010 PE=3 SV=1	15.95	0	71.37	VFETKTSTK	Propionamide(K)@5		missed K-T@5	-0.00110783	1110.59	556.303	1110.59	556.303	2	9	1.1.1.1786.5	14.0357	7492.12	7284.08	14.05	0.23	666.378
tr|A0A498IWS8|A0A498IWS8_MALDO	DNA replication licensing factor MCM6 OS=Malus domestica OX=3750 GN=DVH24_022010 PE=3 SV=1	15.95	0	35.33	VFETKTSTK	Formyl(K)@5		missed K-T@5	-0.00217542	1067.55	534.781	1067.55	534.782	2	6	1.1.1.1672.4	11.3461	414.26	335.67	11.41	0.33	50.4577
tr|A0A498IWS8|A0A498IWS8_MALDO	DNA replication licensing factor MCM6 OS=Malus domestica OX=3750 GN=DVH24_022010 PE=3 SV=1	15.95	0	34.61	VFETKTSTK	Carbamyl(K)@5		missed K-T@5	-0.00227111	1082.56	542.287	1082.56	542.288	2	7	1.1.1.1674.3	11.3943	18083.5	500.22	11.08	0.17	76.3239
tr|A0A498IWS8|A0A498IWS8_MALDO	DNA replication licensing factor MCM6 OS=Malus domestica OX=3750 GN=DVH24_022010 PE=3 SV=1	15.95	0	98.99	VFETKTSTKK	Carbamyl(K)@5; Carbamyl(K)@9		missed K-T@5; missed K-K@9	-0.00199517	1253.66	627.837	1253.66	627.838	2	13	1.1.1.1695.3	11.8859	2429.07	1942.38	11.85	0.16	200.923
tr|A0A498IWS8|A0A498IWS8_MALDO	DNA replication licensing factor MCM6 OS=Malus domestica OX=3750 GN=DVH24_022010 PE=3 SV=1	15.95	0	98.82	VFETKTSTKK	Carbamyl(K)@5; Carbamyl(K)@9		missed K-T@5; missed K-K@9	-0.00199517	1253.66	627.837	1253.66	627.838	2	14	1.1.1.1691.3	11.794	2429.07	2131.98	11.85	0.16	219.365
tr|A0A498IWS8|A0A498IWS8_MALDO	DNA replication licensing factor MCM6 OS=Malus domestica OX=3750 GN=DVH24_022010 PE=3 SV=1	15.95	0	98.13	VFETKTSTKK	Carbamyl(K)@5; Carbamyl(K)@9		missed K-T@5; missed K-K@9	-0.00199517	1253.66	627.837	1253.66	627.838	2	12	1.1.1.1690.3	11.7709	2429.07	1780.46	11.85	0.16	183.082
tr|A0A498IWS8|A0A498IWS8_MALDO	DNA replication licensing factor MCM6 OS=Malus domestica OX=3750 GN=DVH24_022010 PE=3 SV=1	15.95	0	23.14	VFETKTSTKK	Malonyl(K)@5	Malonyl(K)@822	missed K-T@5; missed K-K@9	0.00923823	1253.66	627.837	1253.65	627.832	2	8	1.1.1.1692.8	11.8231	2429.07	2270.35	11.85	0.16	239.31
tr|A0A498IWS8|A0A498IWS8_MALDO	DNA replication licensing factor MCM6 OS=Malus domestica OX=3750 GN=DVH24_022010 PE=3 SV=1	15.95	0	99	VIELYEACSAEIK	Carbamidomethyl(C)@8			-0.000805268	1523.75	762.884	1523.75	762.884	2	21	1.1.1.2208.16	23.9873	16851.1	16774.7	24.07	0.33	1925.62
tr|A0A498IWS8|A0A498IWS8_MALDO	DNA replication licensing factor MCM6 OS=Malus domestica OX=3750 GN=DVH24_022010 PE=3 SV=1	15.95	0	99	VIELYEACSAEIK	Methyl(E)@3; Methyl(L)@4; Carbamidomethyl(C)@8	Methyl(E)@861; Methyl(L)@862		0.00122056	1551.79	776.901	1551.79	776.9	2	17	1.1.1.2227.15	24.4414	16528.3	11146.9	24.11	0.65	774.072
tr|A0A498IWS8|A0A498IWS8_MALDO	DNA replication licensing factor MCM6 OS=Malus domestica OX=3750 GN=DVH24_022010 PE=3 SV=1	15.95	0	99	VIELYEACSAEIK	Carbamidomethyl(C)@8			0.000781653	1523.76	762.885	1523.75	762.884	2	18	1.1.1.2229.13	24.4885	14344.1	9966.99	24.28	0.34	782.061
tr|A0A498IWS8|A0A498IWS8_MALDO	DNA replication licensing factor MCM6 OS=Malus domestica OX=3750 GN=DVH24_022010 PE=3 SV=1	15.95	0	99	VIELYEACSAEIK	Carbamidomethyl(C)@8			0.002222	1523.76	508.926	1523.75	508.925	3	16	1.1.1.2234.5	24.6035	2697.02	2382.9	24.65	0.39	948.887
tr|A0A498IWS8|A0A498IWS8_MALDO	DNA replication licensing factor MCM6 OS=Malus domestica OX=3750 GN=DVH24_022010 PE=3 SV=1	15.95	0	99	VIELYEACSAEIK	Methyl(E)@6; Carbamidomethyl(C)@8; Methyl(S)@9	Methyl(E)@864; Methyl(S)@867		0.00122056	1551.79	776.901	1551.79	776.9	2	13	1.1.1.2248.13	24.9502	16528.3	6178.03	24.11	0.65	406.24
tr|A0A498IWS8|A0A498IWS8_MALDO	DNA replication licensing factor MCM6 OS=Malus domestica OX=3750 GN=DVH24_022010 PE=3 SV=1	15.95	0	99	VIELYEACSAEIK	Carbamidomethyl(C)@8			0.000903723	1523.76	762.885	1523.75	762.884	2	18	1.1.1.2250.12	24.9986	7845.04	7832.37	24.99	0.64	683.608
tr|A0A498IWS8|A0A498IWS8_MALDO	DNA replication licensing factor MCM6 OS=Malus domestica OX=3750 GN=DVH24_022010 PE=3 SV=1	15.95	0	99	VIELYEACSAEIK	Carbamidomethyl(C)@8			-0.000158382	1523.75	508.925	1523.75	508.925	3	14	1.1.1.2255.4	25.1143	2362.28	1914.45	24.99	0.49	1021.5
tr|A0A498IWS8|A0A498IWS8_MALDO	DNA replication licensing factor MCM6 OS=Malus domestica OX=3750 GN=DVH24_022010 PE=3 SV=1	15.95	0	99	VIELYEACSAEIK	Carbamidomethyl(C)@8			0.00212443	1523.76	762.885	1523.75	762.884	2	15	1.1.1.2271.13	25.5136	5088.53	4744.23	25.48	0.56	420.933
tr|A0A498IWS8|A0A498IWS8_MALDO	DNA replication licensing factor MCM6 OS=Malus domestica OX=3750 GN=DVH24_022010 PE=3 SV=1	15.95	0	99	VIELYEACSAEIK	Carbamidomethyl(C)@8			0.00405306	1523.76	508.927	1523.75	508.925	3	13	1.1.1.2281.5	25.7512	1047.16	898.55	25.77	0.17	492.099
tr|A0A498IWS8|A0A498IWS8_MALDO	DNA replication licensing factor MCM6 OS=Malus domestica OX=3750 GN=DVH24_022010 PE=3 SV=1	15.95	0	99	VIELYEACSAEIK	Carbamidomethyl(C)@8			-0.000194914	1523.75	762.884	1523.75	762.884	2	13	1.1.1.2313.10	26.5318	3869.25	2527.54	26.13	0.87	247.815
tr|A0A498IWS8|A0A498IWS8_MALDO	DNA replication licensing factor MCM6 OS=Malus domestica OX=3750 GN=DVH24_022010 PE=3 SV=1	15.95	0	99	VIELYEACSAEIK	Methyl(E)@3; Methyl(L)@4; Carbamidomethyl(C)@8	Methyl(E)@861; Methyl(L)@862		0.00842274	1551.79	776.904	1551.79	776.9	2	11	1.1.1.2333.5	27.0104	128.438	128.438			105.344
tr|A0A498IWS8|A0A498IWS8_MALDO	DNA replication licensing factor MCM6 OS=Malus domestica OX=3750 GN=DVH24_022010 PE=3 SV=1	15.95	0	99	VIELYEACSAEIK	Carbamidomethyl(C)@8			-0.00410118	1523.75	762.882	1523.75	762.884	2	14	1.1.1.2334.6	27.033	2667.12	2215.77	26.76	0.47	208.814
tr|A0A498IWS8|A0A498IWS8_MALDO	DNA replication licensing factor MCM6 OS=Malus domestica OX=3750 GN=DVH24_022010 PE=3 SV=1	15.95	0	99	VIELYEACSAEIK	Carbamidomethyl(C)@8			-0.000194914	1523.75	762.884	1523.75	762.884	2	14	1.1.1.2355.9	27.54	2065.37	1782.72	27.33	0.46	215.261
tr|A0A498IWS8|A0A498IWS8_MALDO	DNA replication licensing factor MCM6 OS=Malus domestica OX=3750 GN=DVH24_022010 PE=3 SV=1	15.95	0	99	VIELYEACSAEIK	Carbamidomethyl(C)@8			-0.000194914	1523.75	762.884	1523.75	762.884	2	9	1.1.1.2366.10	27.8108	1813.08	1692.83	27.7	0.59	300.555
tr|A0A498IWS8|A0A498IWS8_MALDO	DNA replication licensing factor MCM6 OS=Malus domestica OX=3750 GN=DVH24_022010 PE=3 SV=1	15.95	0	99	VIELYEACSAEIK	Carbamidomethyl(C)@8			-0.00104941	1523.75	762.884	1523.75	762.884	2	10	1.1.1.2376.12	28.0545	1535.67	1468.75	28.12	0.37	194.971
tr|A0A498IWS8|A0A498IWS8_MALDO	DNA replication licensing factor MCM6 OS=Malus domestica OX=3750 GN=DVH24_022010 PE=3 SV=1	15.95	0	99	VIELYEACSAEIK	Carbamidomethyl(C)@8			0.00200236	1523.76	762.885	1523.75	762.884	2	16	1.1.1.2418.11	29.096	1474.29	1190.83	28.88	0.39	147.643
tr|A0A498IWS8|A0A498IWS8_MALDO	DNA replication licensing factor MCM6 OS=Malus domestica OX=3750 GN=DVH24_022010 PE=3 SV=1	15.95	0	99	VIELYEACSAEIK	Carbamidomethyl(C)@8			-0.000194914	1523.75	762.884	1523.75	762.884	2	13	1.1.1.2439.8	29.6138	2849.56	1692.94	29.9	0.65	167.434
tr|A0A498IWS8|A0A498IWS8_MALDO	DNA replication licensing factor MCM6 OS=Malus domestica OX=3750 GN=DVH24_022010 PE=3 SV=1	15.95	0	99	VIELYEACSAEIK	Carbamidomethyl(C)@8			-0.000194914	1523.75	762.884	1523.75	762.884	2	12	1.1.1.2460.14	30.1364	2849.56	2001.63	29.9	0.65	219.478
tr|A0A498IWS8|A0A498IWS8_MALDO	DNA replication licensing factor MCM6 OS=Malus domestica OX=3750 GN=DVH24_022010 PE=3 SV=1	15.95	0	99	VIELYEACSAEIK	Carbamidomethyl(C)@8			-0.00165976	1523.75	762.884	1523.75	762.884	2	15	1.1.1.3475.3	38.043	467.87	412.29	38.08	0.54	36.4953
tr|A0A498IWS8|A0A498IWS8_MALDO	DNA replication licensing factor MCM6 OS=Malus domestica OX=3750 GN=DVH24_022010 PE=3 SV=1	15.95	0	99	VIELYEACSAEIK	Carbamidomethyl(C)@8			0.00132143	1523.76	762.885	1523.75	762.884	2	15	1.1.1.2060.15	20.4277	435101	3913.52	20.89	0.28	314.933
tr|A0A498IWS8|A0A498IWS8_MALDO	DNA replication licensing factor MCM6 OS=Malus domestica OX=3750 GN=DVH24_022010 PE=3 SV=1	15.95	0	99	VIELYEACSAEIK	Carbamidomethyl(C)@8			0.00108425	1523.76	508.926	1523.75	508.925	3	18	1.1.1.2067.3	20.5886	88082.1	24207	20.87	0.63	2404.44
tr|A0A498IWS8|A0A498IWS8_MALDO	DNA replication licensing factor MCM6 OS=Malus domestica OX=3750 GN=DVH24_022010 PE=3 SV=1	15.95	0	99	VIELYEACSAEIK	Carbamidomethyl(C)@8			0.00132143	1523.76	762.885	1523.75	762.884	2	23	1.1.1.2081.12	20.9311	435101	416381	20.89	0.28	25941.5
tr|A0A498IWS8|A0A498IWS8_MALDO	DNA replication licensing factor MCM6 OS=Malus domestica OX=3750 GN=DVH24_022010 PE=3 SV=1	15.95	0	99	VIELYEACSAEIK	Carbamidomethyl(C)@8			0.00132143	1523.76	762.885	1523.75	762.884	2	23	1.1.1.2103.10	21.4399	219292	212207	21.41	0.76	14190.7
tr|A0A498IWS8|A0A498IWS8_MALDO	DNA replication licensing factor MCM6 OS=Malus domestica OX=3750 GN=DVH24_022010 PE=3 SV=1	15.95	0	99	VIELYEACSAEIK	Methyl(E)@6; Carbamidomethyl(C)@8	Methyl(E)@864		-0.00170021	1537.77	769.891	1537.77	769.892	2	15	1.1.1.2114.10	21.7004	4210.83	2911.11	21.1	0.85	318.082
tr|A0A498IWS8|A0A498IWS8_MALDO	DNA replication licensing factor MCM6 OS=Malus domestica OX=3750 GN=DVH24_022010 PE=3 SV=1	15.95	0	99	VIELYEACSAEIK	Carbamidomethyl(C)@8			0.00132143	1523.76	762.885	1523.75	762.884	2	23	1.1.1.2124.13	21.9441	219292	138676	21.41	0.76	9316.48
tr|A0A498IWS8|A0A498IWS8_MALDO	DNA replication licensing factor MCM6 OS=Malus domestica OX=3750 GN=DVH24_022010 PE=3 SV=1	15.95	0	99	VIELYEACSAEIK	Carbamidomethyl(C)@8; GG(S)@9; Cation:K(E)@11	GG(S)@867		-0.00139957	1675.75	838.883	1675.75	838.884	2	15	1.1.1.2124.17	21.9474	34519.6	4896.61	22.15	0.44	555.019
tr|A0A498IWS8|A0A498IWS8_MALDO	DNA replication licensing factor MCM6 OS=Malus domestica OX=3750 GN=DVH24_022010 PE=3 SV=1	15.95	0	99	VIELYEACSAEIK	Carbamidomethyl(C)@8			0.00132143	1523.76	762.885	1523.75	762.884	2	23	1.1.1.2145.13	22.454	219292	75226.6	21.41	0.76	4988.52
tr|A0A498IWS8|A0A498IWS8_MALDO	DNA replication licensing factor MCM6 OS=Malus domestica OX=3750 GN=DVH24_022010 PE=3 SV=1	15.95	0	99	VIELYEACSAEIK	Carbamidomethyl(C)@8; GG(S)@9; Cation:K(E)@11	GG(S)@867		-0.00139957	1675.75	838.883	1675.75	838.884	2	17	1.1.1.2145.14	22.4549	34519.6	19258	22.15	0.44	1449.24
tr|A0A498IWS8|A0A498IWS8_MALDO	DNA replication licensing factor MCM6 OS=Malus domestica OX=3750 GN=DVH24_022010 PE=3 SV=1	15.95	0	99	VIELYEACSAEIK	Methyl(E)@3; Methyl(L)@4; Carbamidomethyl(C)@8	Methyl(E)@861; Methyl(L)@862		0.000527324	1551.79	776.9	1551.79	776.9	2	22	1.1.1.2164.12	22.9165	50111.1	37779.7	23.17	1.02	2290.09
tr|A0A498IWS8|A0A498IWS8_MALDO	DNA replication licensing factor MCM6 OS=Malus domestica OX=3750 GN=DVH24_022010 PE=3 SV=1	15.95	0	99	VIELYEACSAEIK	Carbamidomethyl(C)@8			0.00132143	1523.76	762.885	1523.75	762.884	2	23	1.1.1.2166.12	22.9651	219292	32879.1	21.41	0.76	2167.15
tr|A0A498IWS8|A0A498IWS8_MALDO	DNA replication licensing factor MCM6 OS=Malus domestica OX=3750 GN=DVH24_022010 PE=3 SV=1	15.95	0	99	VIELYEACSAEIK	Carbamidomethyl(C)@8; Methyl(E)@11; Methyl(I)@12	Methyl(E)@869; Methyl(I)@870		0.000527324	1551.79	776.9	1551.79	776.9	2	19	1.1.1.2185.12	23.4255	50111.1	39204.4	23.17	1.02	2365.61
tr|A0A498IWS8|A0A498IWS8_MALDO	DNA replication licensing factor MCM6 OS=Malus domestica OX=3750 GN=DVH24_022010 PE=3 SV=1	15.95	0	99	VIELYEACSAEIK	Carbamidomethyl(C)@8; Methyl(S)@9; Methyl(E)@11	Methyl(S)@867; Methyl(E)@869		0.000527324	1551.79	776.9	1551.79	776.9	2	19	1.1.1.2185.12	23.4255	50111.1	39204.4	23.17	1.02	2365.61
tr|A0A498IWS8|A0A498IWS8_MALDO	DNA replication licensing factor MCM6 OS=Malus domestica OX=3750 GN=DVH24_022010 PE=3 SV=1	15.95	0	99	VIELYEACSAEIK	Carbamidomethyl(C)@8			-0.0046836	1523.75	508.924	1523.75	508.925	3	14	1.1.1.2202.5	23.8332	4310.63	3616.74	23.9	0.45	865.222
tr|A0A498IWS8|A0A498IWS8_MALDO	DNA replication licensing factor MCM6 OS=Malus domestica OX=3750 GN=DVH24_022010 PE=3 SV=1	15.95	0	99	VIELYEACSAEIK	Carbamidomethyl(C)@8			-0.0046836	1523.75	508.924	1523.75	508.925	3	16	1.1.1.2204.6	23.8825	4310.63	4012.68	23.9	0.45	791.157
tr|A0A498IWS8|A0A498IWS8_MALDO	DNA replication licensing factor MCM6 OS=Malus domestica OX=3750 GN=DVH24_022010 PE=3 SV=1	15.95	0	99	VIELYEACSAEIK	Carbamidomethyl(C)@8; Methyl(S)@9	Methyl(S)@867		-0.00524026	1537.76	769.889	1537.77	769.892	2	16	1.1.1.2092.8	21.1899	4096.62	3944.07	21.22	0.54	418.795
tr|A0A498IWS8|A0A498IWS8_MALDO	DNA replication licensing factor MCM6 OS=Malus domestica OX=3750 GN=DVH24_022010 PE=3 SV=1	15.95	0	99	VIELYEACSAEIK	Carbamidomethyl(C)@8			0.080827	1523.84	508.952	1523.75	508.925	3	15	1.1.1.2193.2	23.6119	6222.19	4202.68	23.73	0.36	844.431
tr|A0A498IWS8|A0A498IWS8_MALDO	DNA replication licensing factor MCM6 OS=Malus domestica OX=3750 GN=DVH24_022010 PE=3 SV=1	15.95	0	99	VIELYEACSAEIK	Dioxidation(Y)@5; Carbamidomethyl(C)@8	Dioxidation(Y)@863		-0.016702	1555.73	778.871	1555.74	778.879	2	11	1.1.1.2123.10	21.9173	4240.01	3610.73	22.08	0.61	325.428
tr|A0A498IWS8|A0A498IWS8_MALDO	DNA replication licensing factor MCM6 OS=Malus domestica OX=3750 GN=DVH24_022010 PE=3 SV=1	15.95	0	99	VIELYEACSAEIK	Carbamidomethyl(C)@8; GG(S)@9; Cation:K(E)@11	GG(S)@867		-0.00139957	1675.75	838.883	1675.75	838.884	2	12	1.1.1.2166.13	22.9659	34519.6	3615.78	22.15	0.44	336.973
tr|A0A498IWS8|A0A498IWS8_MALDO	DNA replication licensing factor MCM6 OS=Malus domestica OX=3750 GN=DVH24_022010 PE=3 SV=1	15.95	0	99	VIELYEACSAEIK	Dioxidation(Y)@5; Carbamidomethyl(C)@8	Dioxidation(Y)@863		-0.0151151	1555.73	778.872	1555.74	778.879	2	11	1.1.1.2144.12	22.4287	3383.73	3170.31	22.42	0.54	357.913
tr|A0A498IWS8|A0A498IWS8_MALDO	DNA replication licensing factor MCM6 OS=Malus domestica OX=3750 GN=DVH24_022010 PE=3 SV=1	15.95	0	99	VIELYEACSAEIK	No Carbamidomethyl(C)@8			0.0175571	1466.75	734.382	1466.73	734.374	2	12	1.1.1.2043.12	20.0181	3814.35	3770.91	20.03	0.65	829.339
tr|A0A498IWS8|A0A498IWS8_MALDO	DNA replication licensing factor MCM6 OS=Malus domestica OX=3750 GN=DVH24_022010 PE=3 SV=1	15.95	0	99	VIELYEACSAEIK	Carbamidomethyl(C)@8; Oxidation(K)@13	Oxidation(K)@871		-0.000732346	1539.75	770.881	1539.75	770.882	2	11	1.1.1.2026.17	19.6116	6983.8	2652.12	19.77	0.24	346.468
tr|A0A498IWS8|A0A498IWS8_MALDO	DNA replication licensing factor MCM6 OS=Malus domestica OX=3750 GN=DVH24_022010 PE=3 SV=1	15.95	0	98.51	VIELYEACSAEIK	Carbamidomethyl(E)@6; Carbamidomethyl(C)@8			-0.00246093	1580.77	791.394	1580.78	791.395	2	7	1.1.1.2062.17	20.4783	1348.07	895.29	20.58	0.48	151.261
tr|A0A498IWS8|A0A498IWS8_MALDO	DNA replication licensing factor MCM6 OS=Malus domestica OX=3750 GN=DVH24_022010 PE=3 SV=1	15.95	0	95.94	VIELYEACSAEIK	Carbamidomethyl(E)@6; Carbamidomethyl(C)@8			-0.00246093	1580.77	791.394	1580.78	791.395	2	8	1.1.1.2067.12	20.5961	1348.07	1295.91	20.58	0.48	205.835
tr|A0A498IWS8|A0A498IWS8_MALDO	DNA replication licensing factor MCM6 OS=Malus domestica OX=3750 GN=DVH24_022010 PE=3 SV=1	15.95	0	85.87	VIELYEACSAEIK	Carbamidomethyl(C)@8; Cation:Na(E)@11			-0.00135215	1545.73	516.252	1545.74	516.253	3	9	1.1.1.2085.3	21.0133	2778.96	2106.54	20.87	0.52	400.592
tr|A0A498IWS8|A0A498IWS8_MALDO	DNA replication licensing factor MCM6 OS=Malus domestica OX=3750 GN=DVH24_022010 PE=3 SV=1	15.95	0	62.95	VIELYEACSAEIK	Carbamidomethyl(Y)@5; Carbamidomethyl(C)@8			-0.00246093	1580.77	791.394	1580.78	791.395	2	7	1.1.1.2062.17	20.4783	1348.07	895.29	20.58	0.48	151.261
tr|A0A498IWS8|A0A498IWS8_MALDO	DNA replication licensing factor MCM6 OS=Malus domestica OX=3750 GN=DVH24_022010 PE=3 SV=1	15.95	0	61.14	VIELYEACSAEIK	Carbamidomethyl(Y)@5; Carbamidomethyl(C)@8			-0.00246093	1580.77	791.394	1580.78	791.395	2	7	1.1.1.2067.12	20.5961	1348.07	1295.91	20.58	0.48	205.835
tr|A0A498IWS8|A0A498IWS8_MALDO	DNA replication licensing factor MCM6 OS=Malus domestica OX=3750 GN=DVH24_022010 PE=3 SV=1	15.95	0	43.87	VIELYEACSAEIK	HNE(L)@4; Dioxidation(Y)@5; Carbamidomethyl(C)@8	HNE(L)@862; Dioxidation(Y)@863		-0.00215128	1711.86	571.626	1711.86	571.627	3	10	1.1.1.2129.7	22.0607	789.21	231.09	21.74	0.34	928.387
tr|A0A498IWS8|A0A498IWS8_MALDO	DNA replication licensing factor MCM6 OS=Malus domestica OX=3750 GN=DVH24_022010 PE=3 SV=1	15.95	0	43.87	VIELYEACSAEIK	Dioxidation(Y)@5; HNE(A)@7; Carbamidomethyl(C)@8	Dioxidation(Y)@863; HNE(A)@865		-0.00215128	1711.86	571.626	1711.86	571.627	3	10	1.1.1.2129.7	22.0607	789.21	231.09	21.74	0.34	928.387
tr|A0A498IWS8|A0A498IWS8_MALDO	DNA replication licensing factor MCM6 OS=Malus domestica OX=3750 GN=DVH24_022010 PE=3 SV=1	15.95	0	43.37	VIELYEACSAEIK	Oxidation(Y)@5; Carbamidomethyl(C)@8	Oxidation(Y)@863		-0.000732346	1539.75	770.881	1539.75	770.882	2	10	1.1.1.2026.17	19.6116	6983.8	2652.12	19.77	0.24	346.468
tr|A0A498IWS8|A0A498IWS8_MALDO	DNA replication licensing factor MCM6 OS=Malus domestica OX=3750 GN=DVH24_022010 PE=3 SV=1	15.95	0	41.93	VIELYEACSAEIK	Delta:H(4)C(2)@N-term; Carbamidomethyl(C)@8			0.000527324	1551.79	776.9	1551.79	776.9	2	20	1.1.1.2164.12	22.9165	50111.1	37779.7	23.17	1.02	2290.09
tr|A0A498IWS8|A0A498IWS8_MALDO	DNA replication licensing factor MCM6 OS=Malus domestica OX=3750 GN=DVH24_022010 PE=3 SV=1	15.95	0	40.11	VIELYEACSAEIK	Carbamidomethyl(C)@8; Delta:H(4)C(2)(K)@13			0.000527324	1551.79	776.9	1551.79	776.9	2	17	1.1.1.2185.12	23.4255	50111.1	39204.4	23.17	1.02	2365.61
tr|A0A498IWS8|A0A498IWS8_MALDO	DNA replication licensing factor MCM6 OS=Malus domestica OX=3750 GN=DVH24_022010 PE=3 SV=1	15.95	0	33.95	VIELYEACSAEIK	Carbamidomethyl(C)@8; Dioxidation(K)@13	Dioxidation(K)@871		-0.016702	1555.73	778.871	1555.74	778.879	2	10	1.1.1.2123.10	21.9173	4240.01	3610.73	22.08	0.61	325.428
tr|A0A498IWS8|A0A498IWS8_MALDO	DNA replication licensing factor MCM6 OS=Malus domestica OX=3750 GN=DVH24_022010 PE=3 SV=1	15.95	0	31.7	VIELYEACSAEIK	Carbamidomethyl(C)@8; Dimethyl(K)@13	Dimethyl(K)@871		0.000527324	1551.79	776.9	1551.79	776.9	2	17	1.1.1.2185.12	23.4255	50111.1	39204.4	23.17	1.02	2365.61
tr|A0A498IWS8|A0A498IWS8_MALDO	DNA replication licensing factor MCM6 OS=Malus domestica OX=3750 GN=DVH24_022010 PE=3 SV=1	15.95	0	31.34	VIELYEACSAEIK	No Carbamidomethyl(C)@8			0.00217614	1466.73	734.375	1466.73	734.374	2	8	1.1.1.2132.12	22.1377	1029.46	739.37	22.03	0.36	254.112
tr|A0A498IWS8|A0A498IWS8_MALDO	DNA replication licensing factor MCM6 OS=Malus domestica OX=3750 GN=DVH24_022010 PE=3 SV=1	15.95	0	24.67	VIELYEACSAEIK	No Carbamidomethyl(C)@8			0.0175571	1466.75	734.382	1466.73	734.374	2	8	1.1.1.2064.15	20.5254	3814.35	1191.68	20.03	0.65	331.625
tr|A0A498IWS8|A0A498IWS8_MALDO	DNA replication licensing factor MCM6 OS=Malus domestica OX=3750 GN=DVH24_022010 PE=3 SV=1	15.95	0	20.9	VIELYEACSAEIK	Carbamidomethyl(C)@8; Methyl(E)@11	Methyl(E)@869		-0.00524026	1537.76	769.889	1537.77	769.892	2	15	1.1.1.2092.8	21.1899	4096.62	3944.07	21.22	0.54	418.795
tr|A0A498IWS8|A0A498IWS8_MALDO	DNA replication licensing factor MCM6 OS=Malus domestica OX=3750 GN=DVH24_022010 PE=3 SV=1	15.95	0	99	VIELYEACSAEIKTLVK	Carbamidomethyl(C)@8; Carbamyl(K)@13		missed K-T@13	-5.70264e-05	2008.05	670.359	2008.06	670.359	3	15	1.1.1.2342.4	27.2153	3358.24	3142.57	27.19	0.48	613.041
tr|A0A498IWS8|A0A498IWS8_MALDO	DNA replication licensing factor MCM6 OS=Malus domestica OX=3750 GN=DVH24_022010 PE=3 SV=1	15.95	0	99	VSTFIVIEEK				0.00181848	1163.65	582.83	1163.64	582.829	2	7	1.1.1.2207.7	23.9557	2622.97	1453.13	23.36	0.73	198.439
tr|A0A498IWS8|A0A498IWS8_MALDO	DNA replication licensing factor MCM6 OS=Malus domestica OX=3750 GN=DVH24_022010 PE=3 SV=1	15.95	0	99	VSTFIVIEEK	Delta:H(4)C(2)(K)@10			5.27774e-05	1191.68	596.845	1191.68	596.845	2	12	1.1.1.2227.8	24.4356	38023.7	20878.9	24.62	0.29	1816.96
tr|A0A498IWS8|A0A498IWS8_MALDO	DNA replication licensing factor MCM6 OS=Malus domestica OX=3750 GN=DVH24_022010 PE=3 SV=1	15.95	0	99	VSTFIVIEEK				0.000231563	1163.64	582.829	1163.64	582.829	2	7	1.1.1.2229.7	24.4835	1426.92	1316.73	24.48	0.36	176.449
tr|A0A498IWS8|A0A498IWS8_MALDO	DNA replication licensing factor MCM6 OS=Malus domestica OX=3750 GN=DVH24_022010 PE=3 SV=1	15.95	0	99	VSTFIVIEEK				-0.00163183	1163.64	582.828	1163.64	582.829	2	12	1.1.1.2080.4	20.9009	454182	6002.19	21.2	0.35	410.649
tr|A0A498IWS8|A0A498IWS8_MALDO	DNA replication licensing factor MCM6 OS=Malus domestica OX=3750 GN=DVH24_022010 PE=3 SV=1	15.95	0	99	VSTFIVIEEK				-0.00163183	1163.64	582.828	1163.64	582.829	2	17	1.1.1.2102.2	21.4096	454182	229354	21.2	0.35	14467.9
tr|A0A498IWS8|A0A498IWS8_MALDO	DNA replication licensing factor MCM6 OS=Malus domestica OX=3750 GN=DVH24_022010 PE=3 SV=1	15.95	0	99	VSTFIVIEEK				-0.00163183	1163.64	582.828	1163.64	582.829	2	13	1.1.1.2123.5	21.9131	454182	19740.8	21.2	0.35	1497.72
tr|A0A498IWS8|A0A498IWS8_MALDO	DNA replication licensing factor MCM6 OS=Malus domestica OX=3750 GN=DVH24_022010 PE=3 SV=1	15.95	0	99	VSTFIVIEEK				-0.00163183	1163.64	582.828	1163.64	582.829	2	14	1.1.1.2144.8	22.4254	454182	7901.3	21.2	0.35	728.187
tr|A0A498IWS8|A0A498IWS8_MALDO	DNA replication licensing factor MCM6 OS=Malus domestica OX=3750 GN=DVH24_022010 PE=3 SV=1	15.95	0	99	VSTFIVIEEK				0.0011758	1163.65	582.83	1163.64	582.829	2	8	1.1.1.2186.4	23.4432	2622.97	2465.96	23.36	0.73	285.597
tr|A0A498IWS8|A0A498IWS8_MALDO	DNA replication licensing factor MCM6 OS=Malus domestica OX=3750 GN=DVH24_022010 PE=3 SV=1	15.95	0	99	VSTFIVIEEK				-0.00163183	1163.64	582.828	1163.64	582.829	2	10	1.1.1.2129.9	22.0623	454182	13895.9	21.2	0.35	1766.44
tr|A0A498IWS8|A0A498IWS8_MALDO	DNA replication licensing factor MCM6 OS=Malus domestica OX=3750 GN=DVH24_022010 PE=3 SV=1	15.95	0	99	VSTFIVIEEK	Dehydrated(E)@9			-0.00260744	1145.63	573.823	1145.63	573.824	2	8	1.1.1.2128.5	22.0347	750.56	748.69	22.08	0.34	149.162
tr|A0A498IWS8|A0A498IWS8_MALDO	DNA replication licensing factor MCM6 OS=Malus domestica OX=3750 GN=DVH24_022010 PE=3 SV=1	15.95	0	99	VSTFIVIEEK	Dehydrated(E)@8			-0.00260744	1145.63	573.823	1145.63	573.824	2	8	1.1.1.2128.5	22.0347	750.56	748.69	22.08	0.34	149.162
tr|A0A498IWS8|A0A498IWS8_MALDO	DNA replication licensing factor MCM6 OS=Malus domestica OX=3750 GN=DVH24_022010 PE=3 SV=1	15.95	0	95.3	VSTFIVIEEK	Carbamidomethyl(K)@10			0.00165053	1220.67	611.341	1220.67	611.34	2	8	1.1.1.2088.7	21.087	2701.26	2462.51	21.17	0.33	515.338
tr|A0A498IWS8|A0A498IWS8_MALDO	DNA replication licensing factor MCM6 OS=Malus domestica OX=3750 GN=DVH24_022010 PE=3 SV=1	15.95	0	48.57	VSTFIVIEEK	Carbamidomethyl(E)@9			0.00165053	1220.67	611.341	1220.67	611.34	2	8	1.1.1.2088.7	21.087	2701.26	2462.51	21.17	0.33	515.338
tr|A0A498IWS8|A0A498IWS8_MALDO	DNA replication licensing factor MCM6 OS=Malus domestica OX=3750 GN=DVH24_022010 PE=3 SV=1	15.95	0	48.57	VSTFIVIEEK	Carbamidomethyl(E)@8			0.00165053	1220.67	611.341	1220.67	611.34	2	8	1.1.1.2088.7	21.087	2701.26	2462.51	21.17	0.33	515.338
tr|A0A498IWS8|A0A498IWS8_MALDO	DNA replication licensing factor MCM6 OS=Malus domestica OX=3750 GN=DVH24_022010 PE=3 SV=1	15.95	0	19.83	VSTFIVIEEK	Cation:Na(E)@8; Dehydrated(E)@9			-0.0140658	1167.6	584.808	1167.62	584.815	2	10	1.1.1.1994.2	18.8418	114548	24137	18.6	0.28	2033.7
tr|A0A498IWS8|A0A498IWS8_MALDO	DNA replication licensing factor MCM6 OS=Malus domestica OX=3750 GN=DVH24_022010 PE=3 SV=1	15.95	0	99	VSTFIVIEEKVEPPPLPAEAAK			missed K-V@10	-6.70397e-05	2363.3	788.774	2363.3	788.774	3	9	1.1.1.2247.15	24.9274	43587.3	1548.97	25.43	0.22	368.508
tr|A0A498IWS8|A0A498IWS8_MALDO	DNA replication licensing factor MCM6 OS=Malus domestica OX=3750 GN=DVH24_022010 PE=3 SV=1	15.95	0	99	VSTFIVIEEKVEPPPLPAEAAK			missed K-V@10	-6.70397e-05	2363.3	788.774	2363.3	788.774	3	24	1.1.1.2269.13	25.4645	43587.3	41971.2	25.43	0.22	6461.51
tr|A0A498IWS8|A0A498IWS8_MALDO	DNA replication licensing factor MCM6 OS=Malus domestica OX=3750 GN=DVH24_022010 PE=3 SV=1	15.95	0	99	VSTFIVIEEKVEPPPLPAEAAK			missed K-V@10	-6.70397e-05	2363.3	788.774	2363.3	788.774	3	18	1.1.1.2270.15	25.4907	43587.3	40832.6	25.43	0.22	3316.41
tr|A0A498IWS8|A0A498IWS8_MALDO	DNA replication licensing factor MCM6 OS=Malus domestica OX=3750 GN=DVH24_022010 PE=3 SV=1	15.95	0	99	VSTFIVIEEKVEPPPLPAEAAK			missed K-V@10	-0.00446159	2363.29	788.772	2363.3	788.774	3	8	1.1.1.3520.2	38.4015	480.55	436.35	38.37	0.14	54.7303
tr|A0A498IWS8|A0A498IWS8_MALDO	DNA replication licensing factor MCM6 OS=Malus domestica OX=3750 GN=DVH24_022010 PE=3 SV=1	15.95	0	22.11	YGPAYV			cleaved V-S@C-term	-0.00349483	668.313	669.321	668.317	669.324	1	5	1.1.1.1913.4	16.9615	167.126	167.126			195.439
tr|A0A498IWS8|A0A498IWS8_MALDO	DNA replication licensing factor MCM6 OS=Malus domestica OX=3750 GN=DVH24_022010 PE=3 SV=1	15.95	0	99	YGPAYVSGPVFF			cleaved F-V@C-term	0.00233244	1302.63	652.323	1302.63	652.322	2	16	1.1.1.2429.3	29.3613	6443.07	5472.09	29.42	0.62	802.294
Accession #	Name
tr|Q3BCT8|Q3BCT8_MALDO	Thaumatin-like protein OS=Malus domestica OX=3750 GN=Mal d 2.01A PE=3 SV=1
tr|A0A498J8Q1|A0A498J8Q1_MALDO	Uncharacterized protein OS=Malus domestica OX=3750 GN=DVH24_035288 PE=3 SV=1
tr|A0A1L3GTQ6|A0A1L3GTQ6_MALDO	Thaumatin-like protein (Fragment) OS=Malus domestica OX=3750 GN=Mal d 2 PE=2 SV=1
tr|A0A1L3GTQ2|A0A1L3GTQ2_MALDO	Thaumatin-like protein (Fragment) OS=Malus domestica OX=3750 GN=Mal d 2 PE=2 SV=1
sp|Q9FSG7|TP1A_MALDO	Thaumatin-like protein 1a OS=Malus domestica OX=3750 GN=TL1 PE=1 SV=1
Accessions	Names	%Cov(95)	Contrib	Conf	Sequence	Modifications	ProteinModifications	Cleavages	dMass	Obs MW	Obs m/z	Theor MW	Theor m/z	Theor z	Sc	Spectrum	Acq Time	Intensity (Peptide)	PrecursorIntensityAcquisition	Apex Time (Peptide)	Elution Peak Width (Peptide)	MS2Counts
tr|Q3BCT8|Q3BCT8_MALDO; tr|A0A498J8Q1|A0A498J8Q1_MALDO; tr|A0A1L3GTQ6|A0A1L3GTQ6_MALDO; tr|A0A1L3GTQ2|A0A1L3GTQ2_MALDO; sp|Q9FSG7|TP1A_MALDO	Thaumatin-like protein OS=Malus domestica OX=3750 GN=Mal d 2.01A PE=3 SV=1; Uncharacterized protein OS=Malus domestica OX=3750 GN=DVH24_035288 PE=3 SV=1; Thaumatin-like protein (Fragment) OS=Malus domestica OX=3750 GN=Mal d 2 PE=2 SV=1; Thaumatin-like protein (Fragment) OS=Malus domestica OX=3750 GN=Mal d 2 PE=2 SV=1; Thaumatin-like protein 1a OS=Malus domestica OX=3750 GN=TL1 PE=1 SV=1	8.13	2	99	SVDAPSPWSGR				0.00069385	1157.55	579.781	1157.55	579.781	2	15	1.1.1.1909.4	16.8709	44924.3	28688	16.74	0.3	2425.37
tr|Q3BCT8|Q3BCT8_MALDO; tr|A0A498J8Q1|A0A498J8Q1_MALDO; tr|A0A1L3GTQ6|A0A1L3GTQ6_MALDO; tr|A0A1L3GTQ2|A0A1L3GTQ2_MALDO; sp|Q9FSG7|TP1A_MALDO	Thaumatin-like protein OS=Malus domestica OX=3750 GN=Mal d 2.01A PE=3 SV=1; Uncharacterized protein OS=Malus domestica OX=3750 GN=DVH24_035288 PE=3 SV=1; Thaumatin-like protein (Fragment) OS=Malus domestica OX=3750 GN=Mal d 2 PE=2 SV=1; Thaumatin-like protein (Fragment) OS=Malus domestica OX=3750 GN=Mal d 2 PE=2 SV=1; Thaumatin-like protein 1a OS=Malus domestica OX=3750 GN=TL1 PE=1 SV=1	8.13	0.324222	98.02	VCPAPLQVK	Carbamidomethyl(C)@2; Deamidated(Q)@7			0.000547385	1011.54	506.779	1011.54	506.778	2	9	1.1.1.1820.2	14.8116	11446.3	4860.21	14.93	0.21	436.206
tr|Q3BCT8|Q3BCT8_MALDO; tr|A0A498J8Q1|A0A498J8Q1_MALDO; tr|A0A1L3GTQ6|A0A1L3GTQ6_MALDO; tr|A0A1L3GTQ2|A0A1L3GTQ2_MALDO; sp|Q9FSG7|TP1A_MALDO	Thaumatin-like protein OS=Malus domestica OX=3750 GN=Mal d 2.01A PE=3 SV=1; Uncharacterized protein OS=Malus domestica OX=3750 GN=DVH24_035288 PE=3 SV=1; Thaumatin-like protein (Fragment) OS=Malus domestica OX=3750 GN=Mal d 2 PE=2 SV=1; Thaumatin-like protein (Fragment) OS=Malus domestica OX=3750 GN=Mal d 2 PE=2 SV=1; Thaumatin-like protein 1a OS=Malus domestica OX=3750 GN=TL1 PE=1 SV=1	8.13	0.0555173	46.29	SACLAFGDSK	Carbamidomethyl(C)@3			-0.000315215	1054.48	528.245	1054.48	528.245	2	6	1.1.1.1847.5	15.4527	26652.4	780.73	15.16	0.16	166.215
tr|Q3BCT8|Q3BCT8_MALDO; tr|A0A498J8Q1|A0A498J8Q1_MALDO; tr|A0A1L3GTQ6|A0A1L3GTQ6_MALDO; tr|A0A1L3GTQ2|A0A1L3GTQ2_MALDO; sp|Q9FSG7|TP1A_MALDO	Thaumatin-like protein OS=Malus domestica OX=3750 GN=Mal d 2.01A PE=3 SV=1; Uncharacterized protein OS=Malus domestica OX=3750 GN=DVH24_035288 PE=3 SV=1; Thaumatin-like protein (Fragment) OS=Malus domestica OX=3750 GN=Mal d 2 PE=2 SV=1; Thaumatin-like protein (Fragment) OS=Malus domestica OX=3750 GN=Mal d 2 PE=2 SV=1; Thaumatin-like protein 1a OS=Malus domestica OX=3750 GN=TL1 PE=1 SV=1	8.13	0	78.9	AADGSVISCK	Carbamidomethyl(C)@9; Methyl(K)@10	Methyl(K)@181		0.00129249	1020.49	511.253	1020.49	511.253	2	7	1.1.1.1649.3	10.8209	316.61	278.43	10.85	0.2	37.7947
tr|Q3BCT8|Q3BCT8_MALDO; tr|A0A498J8Q1|A0A498J8Q1_MALDO; tr|A0A1L3GTQ6|A0A1L3GTQ6_MALDO; tr|A0A1L3GTQ2|A0A1L3GTQ2_MALDO; sp|Q9FSG7|TP1A_MALDO	Thaumatin-like protein OS=Malus domestica OX=3750 GN=Mal d 2.01A PE=3 SV=1; Uncharacterized protein OS=Malus domestica OX=3750 GN=DVH24_035288 PE=3 SV=1; Thaumatin-like protein (Fragment) OS=Malus domestica OX=3750 GN=Mal d 2 PE=2 SV=1; Thaumatin-like protein (Fragment) OS=Malus domestica OX=3750 GN=Mal d 2 PE=2 SV=1; Thaumatin-like protein 1a OS=Malus domestica OX=3750 GN=TL1 PE=1 SV=1	8.13	0	31.62	AADGSVISCK	Methyl(S)@8; Carbamidomethyl(C)@9	Methyl(S)@179		0.00129249	1020.49	511.253	1020.49	511.253	2	7	1.1.1.1649.3	10.8209	316.61	278.43	10.85	0.2	37.7947
tr|Q3BCT8|Q3BCT8_MALDO; tr|A0A498J8Q1|A0A498J8Q1_MALDO; tr|A0A1L3GTQ6|A0A1L3GTQ6_MALDO; tr|A0A1L3GTQ2|A0A1L3GTQ2_MALDO; sp|Q9FSG7|TP1A_MALDO	Thaumatin-like protein OS=Malus domestica OX=3750 GN=Mal d 2.01A PE=3 SV=1; Uncharacterized protein OS=Malus domestica OX=3750 GN=DVH24_035288 PE=3 SV=1; Thaumatin-like protein (Fragment) OS=Malus domestica OX=3750 GN=Mal d 2 PE=2 SV=1; Thaumatin-like protein (Fragment) OS=Malus domestica OX=3750 GN=Mal d 2 PE=2 SV=1; Thaumatin-like protein 1a OS=Malus domestica OX=3750 GN=TL1 PE=1 SV=1	8.13	0	45.96	SACLAFGDSK	Carbamidomethyl(C)@3			-0.000315215	1054.48	528.245	1054.48	528.245	2	6	1.1.1.1824.11	14.9116	26652.4	1082.92	15.16	0.16	330.726
tr|Q3BCT8|Q3BCT8_MALDO; tr|A0A498J8Q1|A0A498J8Q1_MALDO; tr|A0A1L3GTQ6|A0A1L3GTQ6_MALDO; tr|A0A1L3GTQ2|A0A1L3GTQ2_MALDO; sp|Q9FSG7|TP1A_MALDO	Thaumatin-like protein OS=Malus domestica OX=3750 GN=Mal d 2.01A PE=3 SV=1; Uncharacterized protein OS=Malus domestica OX=3750 GN=DVH24_035288 PE=3 SV=1; Thaumatin-like protein (Fragment) OS=Malus domestica OX=3750 GN=Mal d 2 PE=2 SV=1; Thaumatin-like protein (Fragment) OS=Malus domestica OX=3750 GN=Mal d 2 PE=2 SV=1; Thaumatin-like protein 1a OS=Malus domestica OX=3750 GN=TL1 PE=1 SV=1	8.13	0	99	SVDAPSPWSGR				0.00069385	1157.55	579.781	1157.55	579.781	2	9	1.1.1.1893.5	16.5012	44924.3	4090.85	16.74	0.3	480.869
tr|Q3BCT8|Q3BCT8_MALDO; tr|A0A498J8Q1|A0A498J8Q1_MALDO; tr|A0A1L3GTQ6|A0A1L3GTQ6_MALDO; tr|A0A1L3GTQ2|A0A1L3GTQ2_MALDO; sp|Q9FSG7|TP1A_MALDO	Thaumatin-like protein OS=Malus domestica OX=3750 GN=Mal d 2.01A PE=3 SV=1; Uncharacterized protein OS=Malus domestica OX=3750 GN=DVH24_035288 PE=3 SV=1; Thaumatin-like protein (Fragment) OS=Malus domestica OX=3750 GN=Mal d 2 PE=2 SV=1; Thaumatin-like protein (Fragment) OS=Malus domestica OX=3750 GN=Mal d 2 PE=2 SV=1; Thaumatin-like protein 1a OS=Malus domestica OX=3750 GN=TL1 PE=1 SV=1	8.13	0	95.35	SVDAPSPWSGR				0.00069385	1157.55	579.781	1157.55	579.781	2	10	1.1.1.1908.4	16.84	44924.3	35138.4	16.74	0.3	1067.81
tr|Q3BCT8|Q3BCT8_MALDO; tr|A0A498J8Q1|A0A498J8Q1_MALDO; tr|A0A1L3GTQ6|A0A1L3GTQ6_MALDO; tr|A0A1L3GTQ2|A0A1L3GTQ2_MALDO; sp|Q9FSG7|TP1A_MALDO	Thaumatin-like protein OS=Malus domestica OX=3750 GN=Mal d 2.01A PE=3 SV=1; Uncharacterized protein OS=Malus domestica OX=3750 GN=DVH24_035288 PE=3 SV=1; Thaumatin-like protein (Fragment) OS=Malus domestica OX=3750 GN=Mal d 2 PE=2 SV=1; Thaumatin-like protein (Fragment) OS=Malus domestica OX=3750 GN=Mal d 2 PE=2 SV=1; Thaumatin-like protein 1a OS=Malus domestica OX=3750 GN=TL1 PE=1 SV=1	8.13	0	91.87	VCPAPLQVK	Carbamidomethyl(C)@2			-0.000670483	1010.56	506.286	1010.56	506.286	2	6	1.1.1.1812.9	14.6516	60981.4	14202.8	14.5	0.19	1058.56

## Sheet: Spot 4
Accession #	Name
tr|A0A498KN62|A0A498KN62_MALDO	14_3_3 domain-containing protein OS=Malus domestica OX=3750 GN=DVH24_014430 PE=3 SV=1
Accessions	Names	%Cov(95)	Contrib	Conf	Sequence	Modifications	ProteinModifications	Cleavages	dMass	Obs MW	Obs m/z	Theor MW	Theor m/z	Theor z	Sc	Spectrum	Acq Time	Intensity (Peptide)	PrecursorIntensityAcquisition	Apex Time (Peptide)	Elution Peak Width (Peptide)	MS2Counts
tr|A0A498KN62|A0A498KN62_MALDO	14_3_3 domain-containing protein OS=Malus domestica OX=3750 GN=DVH24_014430 PE=3 SV=1	85.38	2	99	AAQDIAVSDLAPTHPIR				-0.000275147	1773.94	592.32	1773.94	592.32	3	22	1.1.1.2121.4	19.25	10636.6	9419.56	19.28	0.23	2163.93
tr|A0A498KN62|A0A498KN62_MALDO	14_3_3 domain-containing protein OS=Malus domestica OX=3750 GN=DVH24_014430 PE=3 SV=1	85.38	2	99	ASAVPENLSR	Acetyl@N-term	Acetyl@2	cleaved M-A@N-term	0.000747513	1084.55	543.283	1084.55	543.283	2	15	1.1.1.2012.3	16.8501	186832	148455	16.93	0.28	15157.5
tr|A0A498KN62|A0A498KN62_MALDO	14_3_3 domain-containing protein OS=Malus domestica OX=3750 GN=DVH24_014430 PE=3 SV=1	85.38	2	99	DNLTLWTSDLQEQMDEA				0.00290588	2007.88	670.299	2007.87	670.298	3	16	1.1.1.2574.6	29.4347	5868.3	4558.42	29.52	0.32	710.886
tr|A0A498KN62|A0A498KN62_MALDO	14_3_3 domain-containing protein OS=Malus domestica OX=3750 GN=DVH24_014430 PE=3 SV=1	85.38	2	99	DSTLIMQLLR				-0.00342477	1188.65	595.332	1188.65	595.334	2	12	1.1.1.2595.4	29.9609	3045.63	725.76	30.17	0.08	257.509
tr|A0A498KN62|A0A498KN62_MALDO	14_3_3 domain-containing protein OS=Malus domestica OX=3750 GN=DVH24_014430 PE=3 SV=1	85.38	2	99	EQYVYLAK	Glu->pyro-Glu@N-term			0.000986673	994.513	498.264	994.512	498.263	2	12	1.1.1.2164.2	20.2167	9514.05	2560.18	19.93	0.31	658.706
tr|A0A498KN62|A0A498KN62_MALDO	14_3_3 domain-containing protein OS=Malus domestica OX=3750 GN=DVH24_014430 PE=3 SV=1	85.38	2	99	EQYVYLAKLAEQAER	Carbamyl(K)@8		missed K-L@8	0.00145654	1852.93	618.652	1852.93	618.651	3	10	1.1.1.2464.6	26.7256	784.47	781.41	26.76	0.27	352.327
tr|A0A498KN62|A0A498KN62_MALDO	14_3_3 domain-containing protein OS=Malus domestica OX=3750 GN=DVH24_014430 PE=3 SV=1	85.38	2	99	IISSIEQK				-0.000148446	916.523	459.269	916.523	459.269	2	11	1.1.1.1804.4	12.199	111472	11424.5	12.4	0.23	1560.95
tr|A0A498KN62|A0A498KN62_MALDO	14_3_3 domain-containing protein OS=Malus domestica OX=3750 GN=DVH24_014430 PE=3 SV=1	85.38	2	99	IISSIEQKEEGR	Deamidated(Q)@7		missed K-E@8	0.00224636	1388.72	695.366	1388.71	695.365	2	11	1.1.1.1841.3	13.0695	870.44	771.49	13.01	0.25	82.3235
tr|A0A498KN62|A0A498KN62_MALDO	14_3_3 domain-containing protein OS=Malus domestica OX=3750 GN=DVH24_014430 PE=3 SV=1	85.38	2	99	KTAAEDTMVAYK			missed K-T@1	0.00265667	1326.65	443.224	1326.65	443.224	3	19	1.1.1.1848.3	13.2219	18271.1	7290.51	13.05	0.23	1372.86
tr|A0A498KN62|A0A498KN62_MALDO	14_3_3 domain-containing protein OS=Malus domestica OX=3750 GN=DVH24_014430 PE=3 SV=1	85.38	2	99	LAEQAERYEEMVSFMEK			missed R-Y@7	-0.000860078	2088.95	697.323	2088.95	697.324	3	9	1.1.1.2388.4	24.9675	4724.3	849.53	25.17	0.33	190.004
tr|A0A498KN62|A0A498KN62_MALDO	14_3_3 domain-containing protein OS=Malus domestica OX=3750 GN=DVH24_014430 PE=3 SV=1	85.38	2	99	LLQSHLVPSATTGESK				-0.00171936	1666.89	556.636	1666.89	556.637	3	14	1.1.1.1958.6	15.6764	4682.59	3330.12	15.85	0.33	345.299
tr|A0A498KN62|A0A498KN62_MALDO	14_3_3 domain-containing protein OS=Malus domestica OX=3750 GN=DVH24_014430 PE=3 SV=1	85.38	2	99	LVVGSTAAGTELTVEER				-0.000175304	1730.9	577.976	1730.91	577.976	3	8	1.1.1.2532.7	28.3829	205.72	178.47	28.42	0.22	189.673
tr|A0A498KN62|A0A498KN62_MALDO	14_3_3 domain-containing protein OS=Malus domestica OX=3750 GN=DVH24_014430 PE=3 SV=1	85.38	2	99	NLLSVAYK	Deamidated(N)@1			0.00100524	907.503	454.759	907.501	454.758	2	12	1.1.1.2252.2	22.0722	5324.57	4853.73	22.11	0.33	702.81
tr|A0A498KN62|A0A498KN62_MALDO	14_3_3 domain-containing protein OS=Malus domestica OX=3750 GN=DVH24_014430 PE=3 SV=1	85.38	2	99	NLLSVAYKNVIGSLR	Carbamidomethyl(K)@8		missed K-N@8	0.000100433	1702.97	568.665	1702.97	568.665	3	9	1.1.1.2554.4	28.9317	799.52	640.72	28.97	0.45	141.377
tr|A0A498KN62|A0A498KN62_MALDO	14_3_3 domain-containing protein OS=Malus domestica OX=3750 GN=DVH24_014430 PE=3 SV=1	85.38	2	99	QAFEEAIAELDTLGEESYK				-0.00157793	2142	715.007	2142	715.007	3	17	1.1.1.2593.5	29.9174	28228.1	3642.06	30.02	0.1	215.873
tr|A0A498KN62|A0A498KN62_MALDO	14_3_3 domain-containing protein OS=Malus domestica OX=3750 GN=DVH24_014430 PE=3 SV=1	85.38	2	99	SKVETELSAICAGILK	Carbamidomethyl(C)@11		missed K-V@2	0.00218315	1717.93	573.651	1717.93	573.65	3	7	1.1.1.2411.8	25.5058	2311.61	532.15	25.31	0.35	278.831
tr|A0A498KN62|A0A498KN62_MALDO	14_3_3 domain-containing protein OS=Malus domestica OX=3750 GN=DVH24_014430 PE=3 SV=1	85.38	2	99	TAAEDTMVAYK				-0.00218538	1198.55	600.283	1198.55	600.284	2	19	1.1.1.1922.6	14.883	47080.3	6511.96	14.65	0.24	652.721
tr|A0A498KN62|A0A498KN62_MALDO	14_3_3 domain-containing protein OS=Malus domestica OX=3750 GN=DVH24_014430 PE=3 SV=1	85.38	2	99	VETELSAICAGILK	Carbamidomethyl(C)@9			-0.00503486	1502.8	752.405	1502.8	752.408	2	14	1.1.1.2397.2	25.1865	1584	800.57	25.31	0.33	227.048
tr|A0A498KN62|A0A498KN62_MALDO	14_3_3 domain-containing protein OS=Malus domestica OX=3750 GN=DVH24_014430 PE=3 SV=1	85.38	2	99	YEEMVSFMEK				-0.00122837	1291.55	646.78	1291.55	646.781	2	17	1.1.1.2257.4	22.1979	11743.7	5604.65	21.99	0.35	722.932
tr|A0A498KN62|A0A498KN62_MALDO	14_3_3 domain-containing protein OS=Malus domestica OX=3750 GN=DVH24_014430 PE=3 SV=1	85.38	1.4318	96.73	NEEHVALVK				-0.0020478	1037.55	519.782	1037.55	519.783	2	7	1.1.1.1755.2	11.2808	6313.71	555.02	11.45	0.17	30.3919
tr|A0A498KN62|A0A498KN62_MALDO	14_3_3 domain-containing protein OS=Malus domestica OX=3750 GN=DVH24_014430 PE=3 SV=1	85.38	0.74958	99	SAVPENLSR			cleaved A-S@N-term	-0.00150835	971.502	486.758	971.504	486.759	2	8	1.1.1.1818.2	12.5258	1421.26	832.06	12.63	0.26	110.71
tr|A0A498KN62|A0A498KN62_MALDO	14_3_3 domain-containing protein OS=Malus domestica OX=3750 GN=DVH24_014430 PE=3 SV=1	85.38	0.423659	99	STAAGTELTVEER			cleaved G-S@N-term	-0.000275987	1362.66	682.338	1362.66	682.339	2	12	1.1.1.1897.2	14.3217	417.24	367.79	14.41	0.41	74.5209
tr|A0A498KN62|A0A498KN62_MALDO	14_3_3 domain-containing protein OS=Malus domestica OX=3750 GN=DVH24_014430 PE=3 SV=1	85.38	0.326979	99	YLAEFKNGDER	Carbamyl(K)@6		missed K-N@6	-0.00226363	1383.64	692.827	1383.64	692.828	2	13	1.1.1.2029.3	17.2485	1040.94	557.48	17.36	0.31	103.064
tr|A0A498KN62|A0A498KN62_MALDO	14_3_3 domain-containing protein OS=Malus domestica OX=3750 GN=DVH24_014430 PE=3 SV=1	85.38	0.0809219	99	NEEHVALVKQYR	Carbamyl(K)@9		missed K-Q@9	-0.00376301	1527.78	510.266	1527.78	510.267	3	10	1.1.1.1972.4	15.9846	1385.55	1097.71	16.11	0.3	233.752
tr|A0A498KN62|A0A498KN62_MALDO	14_3_3 domain-containing protein OS=Malus domestica OX=3750 GN=DVH24_014430 PE=3 SV=1	85.38	0.0644927	99	VFYLKMK	Carbamyl(K)@5		missed K-M@5	0.00147458	970.532	486.274	970.531	486.273	2	11	1.1.1.2252.3	22.0746	9100.23	6365.45	21.95	0.45	1034.3
tr|A0A498KN62|A0A498KN62_MALDO	14_3_3 domain-containing protein OS=Malus domestica OX=3750 GN=DVH24_014430 PE=3 SV=1	85.38	0.0362122	99	TAAGTELTVEER			cleaved S-T@N-term	-0.00129095	1275.63	638.822	1275.63	638.823	2	12	1.1.1.1891.4	14.1954	307.05	296.44	14.18	0.22	54.1432
tr|A0A498KN62|A0A498KN62_MALDO	14_3_3 domain-containing protein OS=Malus domestica OX=3750 GN=DVH24_014430 PE=3 SV=1	85.38	0.00744649	95.05	GTELTVEER			cleaved A-G@N-term	-0.0013213	1032.51	517.261	1032.51	517.262	2	7	1.1.1.1833.4	12.8743	13212.1	574.37	13.24	0.29	53.219
tr|A0A498KN62|A0A498KN62_MALDO	14_3_3 domain-containing protein OS=Malus domestica OX=3750 GN=DVH24_014430 PE=3 SV=1	85.38	0.00174067	95.88	AAGTELTVEER			cleaved T-A@N-term	0.00390815	1174.59	588.301	1174.58	588.299	2	8	1.1.1.1863.5	13.5543	510.65	298.34	13.66	0.38	56.1486
tr|A0A498KN62|A0A498KN62_MALDO	14_3_3 domain-containing protein OS=Malus domestica OX=3750 GN=DVH24_014430 PE=3 SV=1	85.38	0.000434506	98.5	EEHVALVK	Glu->pyro-Glu@N-term		cleaved N-E@N-term	-0.000583366	905.496	453.755	905.497	453.756	2	10	1.1.1.1892.6	14.2163	1020.67	686.23	14.13	0.22	204.385
tr|A0A498KN62|A0A498KN62_MALDO	14_3_3 domain-containing protein OS=Malus domestica OX=3750 GN=DVH24_014430 PE=3 SV=1	85.38	0.000434506	19.91	LVPSATTGESK			cleaved H-L@N-term	-0.00156781	1088.57	545.292	1088.57	545.293	2	5	1.1.1.1681.2	10.4602	485.69	389.39	10.51	0.16	34.8897
tr|A0A498KN62|A0A498KN62_MALDO	14_3_3 domain-containing protein OS=Malus domestica OX=3750 GN=DVH24_014430 PE=3 SV=1	85.38	0	99	ASAVPENLSR	Acetyl@N-term	Acetyl@2	cleaved M-A@N-term	0.000747513	1084.55	543.283	1084.55	543.283	2	12	1.1.1.2036.2	17.3631	186832	4926.04	16.93	0.28	779.049
tr|A0A498KN62|A0A498KN62_MALDO	14_3_3 domain-containing protein OS=Malus domestica OX=3750 GN=DVH24_014430 PE=3 SV=1	85.38	0	96.88	ASAVPENLSR	Acetyl@N-term; Dimethyl(N)@7	Acetyl@2; Dimethyl(N)@8	cleaved M-A@N-term	7.94984e-05	1112.58	557.299	1112.58	557.299	2	14	1.1.1.2174.2	20.4281	34883.7	28929.4	20.49	0.27	3232.8
tr|A0A498KN62|A0A498KN62_MALDO	14_3_3 domain-containing protein OS=Malus domestica OX=3750 GN=DVH24_014430 PE=3 SV=1	85.38	0	17.23	ASAVPENLSR	Acetyl@N-term; Deamidated(R)@10	Acetyl@2; Deamidated(R)@11	cleaved M-A@N-term	0.00234019	1085.54	543.776	1085.54	543.775	2	7	1.1.1.2054.8	17.7808	9943.24	9500.9	17.8	0.28	928.242
tr|A0A498KN62|A0A498KN62_MALDO	14_3_3 domain-containing protein OS=Malus domestica OX=3750 GN=DVH24_014430 PE=3 SV=1	85.38	0	99	DSTLIMQLLR	Oxidation(M)@6			0.000617608	1204.65	603.332	1204.65	603.332	2	15	1.1.1.2492.4	27.4	22720.2	14757.1	27.68	0.56	1542.33
tr|A0A498KN62|A0A498KN62_MALDO	14_3_3 domain-containing protein OS=Malus domestica OX=3750 GN=DVH24_014430 PE=3 SV=1	85.38	0	99	DSTLIMQLLR	Oxidation(M)@6			0.000617608	1204.65	603.332	1204.65	603.332	2	16	1.1.1.2513.6	27.915	22720.2	11265.2	27.68	0.56	1195.72
tr|A0A498KN62|A0A498KN62_MALDO	14_3_3 domain-containing protein OS=Malus domestica OX=3750 GN=DVH24_014430 PE=3 SV=1	85.38	0	99	DSTLIMQLLR	Carbamyl(M)@6			0.00173885	1231.66	616.838	1231.66	616.837	2	12	1.1.1.2517.4	28.0102	1040.38	877.22	27.85	0.49	152.441
tr|A0A498KN62|A0A498KN62_MALDO	14_3_3 domain-containing protein OS=Malus domestica OX=3750 GN=DVH24_014430 PE=3 SV=1	85.38	0	99	DSTLIMQLLR	Oxidation(M)@6			0.000617608	1204.65	603.332	1204.65	603.332	2	8	1.1.1.2550.8	28.8359	1328.2	1257.06	28.85	0.8	261.689
tr|A0A498KN62|A0A498KN62_MALDO	14_3_3 domain-containing protein OS=Malus domestica OX=3750 GN=DVH24_014430 PE=3 SV=1	85.38	0	99	DSTLIMQLLR	Oxidation(M)@6			0.000617608	1204.65	603.332	1204.65	603.332	2	8	1.1.1.2570.4	29.3353	1328.2	458.64	28.85	0.8	193.44
tr|A0A498KN62|A0A498KN62_MALDO	14_3_3 domain-containing protein OS=Malus domestica OX=3750 GN=DVH24_014430 PE=3 SV=1	85.38	0	99	DSTLIMQLLR				-0.000250912	1188.65	595.334	1188.65	595.334	2	16	1.1.1.2575.4	29.4605	29329.9	25891.3	29.4	0.33	3504.86
tr|A0A498KN62|A0A498KN62_MALDO	14_3_3 domain-containing protein OS=Malus domestica OX=3750 GN=DVH24_014430 PE=3 SV=1	85.38	0	99	EQYVYLAK	Glu->pyro-Glu@N-term			0.000986673	994.513	498.264	994.512	498.263	2	11	1.1.1.2141.3	19.7097	9514.05	954.98	19.93	0.31	346.904
tr|A0A498KN62|A0A498KN62_MALDO	14_3_3 domain-containing protein OS=Malus domestica OX=3750 GN=DVH24_014430 PE=3 SV=1	85.38	0	99	EQYVYLAK				0.000410463	1012.52	507.269	1012.52	507.269	2	12	1.1.1.2008.3	16.7544	490034	213329	16.55	0.29	16927.2
tr|A0A498KN62|A0A498KN62_MALDO	14_3_3 domain-containing protein OS=Malus domestica OX=3750 GN=DVH24_014430 PE=3 SV=1	85.38	0	97.41	EQYVYLAK				0.000410463	1012.52	507.269	1012.52	507.269	2	8	1.1.1.2030.2	17.2588	490034	2113.6	16.55	0.29	241.111
tr|A0A498KN62|A0A498KN62_MALDO	14_3_3 domain-containing protein OS=Malus domestica OX=3750 GN=DVH24_014430 PE=3 SV=1	85.38	0	41.99	EQYVYLAK				0.000410463	1012.52	507.269	1012.52	507.269	2	6	1.1.1.1984.3	16.2417	490034	1851.48	16.55	0.29	234.19
tr|A0A498KN62|A0A498KN62_MALDO	14_3_3 domain-containing protein OS=Malus domestica OX=3750 GN=DVH24_014430 PE=3 SV=1	85.38	0	96.25	IISSIEQK				-0.000148446	916.523	459.269	916.523	459.269	2	9	1.1.1.1826.4	12.7171	111472	3444.92	12.4	0.23	583.311
tr|A0A498KN62|A0A498KN62_MALDO	14_3_3 domain-containing protein OS=Malus domestica OX=3750 GN=DVH24_014430 PE=3 SV=1	85.38	0	94.57	IISSIEQK				0.00064502	916.524	459.269	916.523	459.269	2	9	1.1.1.1848.4	13.2252	1038.65	609.38	13.1	0.4	186.343
tr|A0A498KN62|A0A498KN62_MALDO	14_3_3 domain-containing protein OS=Malus domestica OX=3750 GN=DVH24_014430 PE=3 SV=1	85.38	0	22.22	IISSIEQK	Deamidated(Q)@7; Delta:H(4)C(2)(K)@8			0.00270659	945.541	473.778	945.538	473.776	2	8	1.1.1.2021.3	17.0593	1972.75	1909.37	17.09	0.16	215.616
tr|A0A498KN62|A0A498KN62_MALDO	14_3_3 domain-containing protein OS=Malus domestica OX=3750 GN=DVH24_014430 PE=3 SV=1	85.38	0	18.91	IISSIEQK	Deamidated(Q)@7; Dimethyl(K)@8	Dimethyl(K)@80		0.00270659	945.541	473.778	945.538	473.776	2	8	1.1.1.2021.3	17.0593	1972.75	1909.37	17.09	0.16	215.616
tr|A0A498KN62|A0A498KN62_MALDO	14_3_3 domain-containing protein OS=Malus domestica OX=3750 GN=DVH24_014430 PE=3 SV=1	85.38	0	17.73	IISSIEQK				-0.000148446	916.523	459.269	916.523	459.269	2	7	1.1.1.1801.2	12.1369	111472	1603.22	12.4	0.23	186.668
tr|A0A498KN62|A0A498KN62_MALDO	14_3_3 domain-containing protein OS=Malus domestica OX=3750 GN=DVH24_014430 PE=3 SV=1	85.38	0	99	IISSIEQKEEGR	Carbamyl(K)@8		missed K-E@8	0.00117252	1430.74	716.376	1430.74	716.376	2	12	1.1.1.1973.3	16.0119	1624.8	752.86	16.11	0.26	87.4711
tr|A0A498KN62|A0A498KN62_MALDO	14_3_3 domain-containing protein OS=Malus domestica OX=3750 GN=DVH24_014430 PE=3 SV=1	85.38	0	99	IISSIEQKEEGR			missed K-E@8	-0.000707131	1387.73	463.584	1387.73	463.584	3	11	1.1.1.1837.2	12.9686	66500.1	7915.01	12.7	0.23	804.78
tr|A0A498KN62|A0A498KN62_MALDO	14_3_3 domain-containing protein OS=Malus domestica OX=3750 GN=DVH24_014430 PE=3 SV=1	85.38	0	27.62	IISSIEQKEEGR			missed K-E@8	-0.000707131	1387.73	463.584	1387.73	463.584	3	8	1.1.1.1815.2	12.4526	66500.1	1741.7	12.7	0.23	282.485
tr|A0A498KN62|A0A498KN62_MALDO	14_3_3 domain-containing protein OS=Malus domestica OX=3750 GN=DVH24_014430 PE=3 SV=1	85.38	0	17.48	IISSIEQKEEGR			missed K-E@8	-0.000707131	1387.73	463.584	1387.73	463.584	3	6	1.1.1.1860.3	13.4737	66500.1	628.63	12.7	0.23	136.91
tr|A0A498KN62|A0A498KN62_MALDO	14_3_3 domain-containing protein OS=Malus domestica OX=3750 GN=DVH24_014430 PE=3 SV=1	85.38	0	99	KTAAEDTMVAYK	Oxidation(M)@8		missed K-T@1	0.000362118	1342.64	448.555	1342.64	448.555	3	18	1.1.1.1686.2	10.5153	17179.6	15777.7	10.49	0.19	2153.03
tr|A0A498KN62|A0A498KN62_MALDO	14_3_3 domain-containing protein OS=Malus domestica OX=3750 GN=DVH24_014430 PE=3 SV=1	85.38	0	99	KTAAEDTMVAYK	Dioxidation(M)@8	Dioxidation(M)@160	missed K-T@1	0.0010898	1358.64	453.887	1358.64	453.887	3	13	1.1.1.1722.2	10.8915	385.18	350.04	10.96	0.3	80.3245
tr|A0A498KN62|A0A498KN62_MALDO	14_3_3 domain-containing protein OS=Malus domestica OX=3750 GN=DVH24_014430 PE=3 SV=1	85.38	0	99	KTAAEDTMVAYK	Carbamyl(M)@8		missed K-T@1	3.73914e-05	1369.65	457.559	1369.65	457.559	3	13	1.1.1.1734.2	11.0271	414.86	319.34	11.12	0.24	61.1772
tr|A0A498KN62|A0A498KN62_MALDO	14_3_3 domain-containing protein OS=Malus domestica OX=3750 GN=DVH24_014430 PE=3 SV=1	85.38	0	98.5	KTAAEDTMVAYK	Carbamyl@N-term; Oxidation(M)@8		missed K-T@1	-0.00343165	1385.65	693.83	1385.65	693.832	2	9	1.1.1.1813.3	12.4178	732.76	316.75	12.52	0.21	33.6966
tr|A0A498KN62|A0A498KN62_MALDO	14_3_3 domain-containing protein OS=Malus domestica OX=3750 GN=DVH24_014430 PE=3 SV=1	85.38	0	96.25	KTAAEDTMVAYK	GGQ(K)@1	GGQ(K)@153	missed K-T@1	0.0201905	1568.77	785.393	1568.75	785.383	2	8	1.1.1.1904.3	14.4726	814.92	459.18	14.56	0.17	77.176
tr|A0A498KN62|A0A498KN62_MALDO	14_3_3 domain-containing protein OS=Malus domestica OX=3750 GN=DVH24_014430 PE=3 SV=1	85.38	0	95.05	KTAAEDTMVAYK	Oxidation(M)@8		missed K-T@1	0.00219319	1342.65	448.556	1342.64	448.555	3	8	1.1.1.1806.4	12.2461	288.48	280.35	12.26	0.37	79.4565
tr|A0A498KN62|A0A498KN62_MALDO	14_3_3 domain-containing protein OS=Malus domestica OX=3750 GN=DVH24_014430 PE=3 SV=1	85.38	0	92.86	KTAAEDTMVAYK	Oxidation(M)@8		missed K-T@1	0.00155232	1342.65	448.556	1342.64	448.555	3	8	1.1.1.1643.2	10.0104	404.16	319.12	10.06	0.23	45.7409
tr|A0A498KN62|A0A498KN62_MALDO	14_3_3 domain-containing protein OS=Malus domestica OX=3750 GN=DVH24_014430 PE=3 SV=1	85.38	0	17.11	KTAAEDTMVAYK	Carbamyl(K)@1; Oxidation(M)@8		missed K-T@1	-0.00343165	1385.65	693.83	1385.65	693.832	2	9	1.1.1.1813.3	12.4178	732.76	316.75	12.52	0.21	33.6966
tr|A0A498KN62|A0A498KN62_MALDO	14_3_3 domain-containing protein OS=Malus domestica OX=3750 GN=DVH24_014430 PE=3 SV=1	85.38	0	19.04	LAEQAER	Dimethyl(R)@7	Dimethyl(R)@26		-0.00109218	843.444	422.729	843.445	422.73	2	8	1.1.1.1689.2	10.5769	2281.62	433.5	10.71	0.14	62.4267
tr|A0A498KN62|A0A498KN62_MALDO	14_3_3 domain-containing protein OS=Malus domestica OX=3750 GN=DVH24_014430 PE=3 SV=1	85.38	0	99	LAEQAERYEEMVSFMEK	Oxidation(M)@11; Oxidation(M)@15		missed R-Y@7	-0.00202732	2120.94	707.986	2120.94	707.987	3	14	1.1.1.2105.2	18.9396	17290.5	4823.84	18.71	0.38	312.408
tr|A0A498KN62|A0A498KN62_MALDO	14_3_3 domain-containing protein OS=Malus domestica OX=3750 GN=DVH24_014430 PE=3 SV=1	85.38	0	99	LAEQAERYEEMVSFMEK	Oxidation(M)@15		missed R-Y@7	-0.00269577	2104.94	702.654	2104.94	702.655	3	17	1.1.1.2220.2	21.3802	4180.09	3158.51	21.55	0.33	400.166
tr|A0A498KN62|A0A498KN62_MALDO	14_3_3 domain-containing protein OS=Malus domestica OX=3750 GN=DVH24_014430 PE=3 SV=1	85.38	0	99	LAEQAERYEEMVSFMEK	Oxidation(M)@11		missed R-Y@7	-0.000315368	2104.94	702.655	2104.94	702.655	3	17	1.1.1.2194.3	20.8625	3394.83	1862.73	21.03	0.44	273.789
tr|A0A498KN62|A0A498KN62_MALDO	14_3_3 domain-containing protein OS=Malus domestica OX=3750 GN=DVH24_014430 PE=3 SV=1	85.38	0	99	LAEQAERYEEMVSFMEK	Oxidation(M)@11; Oxidation(M)@15		missed R-Y@7	-0.00202732	2120.94	707.986	2120.94	707.987	3	13	1.1.1.2082.4	18.4189	17290.5	3956.33	18.71	0.38	268.548
tr|A0A498KN62|A0A498KN62_MALDO	14_3_3 domain-containing protein OS=Malus domestica OX=3750 GN=DVH24_014430 PE=3 SV=1	85.38	0	98.63	LLQSHLVPSATTGESK				-0.00171936	1666.89	556.636	1666.89	556.637	3	11	1.1.1.1979.3	16.1417	4682.59	576.81	15.85	0.33	281.442
tr|A0A498KN62|A0A498KN62_MALDO	14_3_3 domain-containing protein OS=Malus domestica OX=3750 GN=DVH24_014430 PE=3 SV=1	85.38	0	22.81	LLQSHLVPSATTGESK	Delta:H(4)C(2)(K)@16			0.00188767	1694.92	565.981	1694.92	565.981	3	8	1.1.1.2051.8	17.7132	1075.5	994.04	17.7	0.23	236.751
tr|A0A498KN62|A0A498KN62_MALDO	14_3_3 domain-containing protein OS=Malus domestica OX=3750 GN=DVH24_014430 PE=3 SV=1	85.38	0	19.18	LLQSHLVPSATTGESK	Dimethyl(K)@16	Dimethyl(K)@129		0.00188767	1694.92	565.981	1694.92	565.981	3	8	1.1.1.2051.8	17.7132	1075.5	994.04	17.7	0.23	236.751
tr|A0A498KN62|A0A498KN62_MALDO	14_3_3 domain-containing protein OS=Malus domestica OX=3750 GN=DVH24_014430 PE=3 SV=1	85.38	0	99	LVVGSTAAGTELTVEER				0.00028521	1730.91	866.46	1730.91	866.46	2	18	1.1.1.2588.6	29.7885	546.6	497.92	29.9	0.5	142.564
tr|A0A498KN62|A0A498KN62_MALDO	14_3_3 domain-containing protein OS=Malus domestica OX=3750 GN=DVH24_014430 PE=3 SV=1	85.38	0	99	LVVGSTAAGTELTVEER				0.00112947	1730.91	866.46	1730.91	866.46	2	21	1.1.1.2142.6	19.7383	107737	87650.5	19.63	0.44	290.344
tr|A0A498KN62|A0A498KN62_MALDO	14_3_3 domain-containing protein OS=Malus domestica OX=3750 GN=DVH24_014430 PE=3 SV=1	85.38	0	99	LVVGSTAAGTELTVEER				-0.000457471	1730.9	866.46	1730.91	866.46	2	21	1.1.1.2165.2	20.2433	16356.5	15126.5	20.4	0.54	91.1193
tr|A0A498KN62|A0A498KN62_MALDO	14_3_3 domain-containing protein OS=Malus domestica OX=3750 GN=DVH24_014430 PE=3 SV=1	85.38	0	99	LVVGSTAAGTELTVEER				-0.0011899	1730.9	866.459	1730.91	866.46	2	16	1.1.1.2189.4	20.77	15978.2	8278.37	20.52	0.31	38.7006
tr|A0A498KN62|A0A498KN62_MALDO	14_3_3 domain-containing protein OS=Malus domestica OX=3750 GN=DVH24_014430 PE=3 SV=1	85.38	0	99	LVVGSTAAGTELTVEER	Methyl(T)@10; Methyl(E)@11	Methyl(T)@46; Methyl(E)@47		0.000348193	1758.94	587.319	1758.94	587.319	3	16	1.1.1.2277.2	22.6214	9690.01	2417.78	22.35	0.3	416.165
tr|A0A498KN62|A0A498KN62_MALDO	14_3_3 domain-containing protein OS=Malus domestica OX=3750 GN=DVH24_014430 PE=3 SV=1	85.38	0	99	LVVGSTAAGTELTVEER				0.00454749	1730.91	866.462	1730.91	866.46	2	12	1.1.1.2382.14	24.834	1007.63	907.96	24.82	0.42	180.162
tr|A0A498KN62|A0A498KN62_MALDO	14_3_3 domain-containing protein OS=Malus domestica OX=3750 GN=DVH24_014430 PE=3 SV=1	85.38	0	91.45	LVVGSTAAGTELTVEER				3.08173e-05	1730.91	866.46	1730.91	866.46	2	8	1.1.1.2262.17	22.3146	3106.99	1898.03	22.09	0.61	127.122
tr|A0A498KN62|A0A498KN62_MALDO	14_3_3 domain-containing protein OS=Malus domestica OX=3750 GN=DVH24_014430 PE=3 SV=1	85.38	0	40.69	LVVGSTAAGTELTVEER				-0.00381284	1730.9	577.974	1730.91	577.976	3	9	1.1.1.2290.2	22.8872	1081.31	766.51	22.99	0.21	310.365
tr|A0A498KN62|A0A498KN62_MALDO	14_3_3 domain-containing protein OS=Malus domestica OX=3750 GN=DVH24_014430 PE=3 SV=1	85.38	0	31.99	LVVGSTAAGTELTVEER				-0.00387549	1730.9	866.458	1730.91	866.46	2	6	1.1.1.2312.6	23.3497	1418.41	667.45	23.53	0.7	25.3196
tr|A0A498KN62|A0A498KN62_MALDO	14_3_3 domain-containing protein OS=Malus domestica OX=3750 GN=DVH24_014430 PE=3 SV=1	85.38	0	91.45	NEEHVALVK	Delta:H(4)C(2)(H)@4			-0.00186697	1065.58	533.797	1065.58	533.798	2	10	1.1.1.1940.9	15.3012	1700.28	1570.59	15.33	0.28	193.952
tr|A0A498KN62|A0A498KN62_MALDO	14_3_3 domain-containing protein OS=Malus domestica OX=3750 GN=DVH24_014430 PE=3 SV=1	85.38	0	68.24	NEEHVALVK	Delta:H(4)C(2)@N-term			-0.00125661	1065.58	533.798	1065.58	533.798	2	9	1.1.1.1894.4	14.2678	7479.64	759.11	14.49	0.25	104.819
tr|A0A498KN62|A0A498KN62_MALDO	14_3_3 domain-containing protein OS=Malus domestica OX=3750 GN=DVH24_014430 PE=3 SV=1	85.38	0	99	NLLSVAYK	Deamidated(N)@1			0.0016156	907.503	454.759	907.501	454.758	2	11	1.1.1.2193.2	20.831	17375.9	4599.51	20.57	0.31	773.976
tr|A0A498KN62|A0A498KN62_MALDO	14_3_3 domain-containing protein OS=Malus domestica OX=3750 GN=DVH24_014430 PE=3 SV=1	85.38	0	83.12	NLLSVAYK	Deamidated(N)@1			0.0016156	907.503	454.759	907.501	454.758	2	7	1.1.1.2169.2	20.3438	17375.9	2323.69	20.57	0.31	481.577
tr|A0A498KN62|A0A498KN62_MALDO	14_3_3 domain-containing protein OS=Malus domestica OX=3750 GN=DVH24_014430 PE=3 SV=1	85.38	0	70.12	NLLSVAYK				0.00142759	906.519	454.267	906.517	454.266	2	8	1.1.1.2205.2	21.0441	2315.39	308.36	20.57	0.33	215.41
tr|A0A498KN62|A0A498KN62_MALDO	14_3_3 domain-containing protein OS=Malus domestica OX=3750 GN=DVH24_014430 PE=3 SV=1	85.38	0	64.42	NLLSVAYK				0.00142759	906.519	454.267	906.517	454.266	2	13	1.1.1.2146.3	19.8174	435564	97536.1	19.54	0.32	14738.3
tr|A0A498KN62|A0A498KN62_MALDO	14_3_3 domain-containing protein OS=Malus domestica OX=3750 GN=DVH24_014430 PE=3 SV=1	85.38	0	27.62	NLLSVAYK				0.00142759	906.519	454.267	906.517	454.266	2	13	1.1.1.2124.2	19.3092	435564	113554	19.54	0.32	17443.8
tr|A0A498KN62|A0A498KN62_MALDO	14_3_3 domain-containing protein OS=Malus domestica OX=3750 GN=DVH24_014430 PE=3 SV=1	85.38	0	99	NLLSVAYKNVIGSLR	Deamidated(N)@9		missed K-N@8	0.00208234	1646.94	824.476	1646.94	824.475	2	11	1.1.1.2598.17	30.0411	2285.55	2081.68	30.05	0.08	354.295
tr|A0A498KN62|A0A498KN62_MALDO	14_3_3 domain-containing protein OS=Malus domestica OX=3750 GN=DVH24_014430 PE=3 SV=1	85.38	0	99	NLLSVAYKNVIGSLR	Carbamyl(K)@8		missed K-N@8	0.000704771	1688.96	563.993	1688.96	563.993	3	18	1.1.1.2603.3	30.1532	20647.6	14776.4	30.18	0.05	1567.99
tr|A0A498KN62|A0A498KN62_MALDO	14_3_3 domain-containing protein OS=Malus domestica OX=3750 GN=DVH24_014430 PE=3 SV=1	85.38	0	99	NLLSVAYKNVIGSLR	Carbamyl(K)@8		missed K-N@8	0.000200393	1688.96	845.486	1688.96	845.486	2	21	1.1.1.2605.17	30.2151	23800.9	14514.9	30.18	0.05	901.954
tr|A0A498KN62|A0A498KN62_MALDO	14_3_3 domain-containing protein OS=Malus domestica OX=3750 GN=DVH24_014430 PE=3 SV=1	85.38	0	99	QAFEEAIAELDTLGEESYK	Dimethyl(K)@19	Dimethyl(K)@226		-0.00221688	2170.03	724.351	2170.03	724.351	3	12	1.1.1.2601.11	30.1096	8241.35	5993.57	30.15	0.08	520.635
tr|A0A498KN62|A0A498KN62_MALDO	14_3_3 domain-containing protein OS=Malus domestica OX=3750 GN=DVH24_014430 PE=3 SV=1	85.38	0	99	QAFEEAIAELDTLGEESYK	Delta:H(4)C(2)(K)@19			-0.00221688	2170.03	724.351	2170.03	724.351	3	12	1.1.1.2601.11	30.1096	8241.35	5993.57	30.15	0.08	520.635
tr|A0A498KN62|A0A498KN62_MALDO	14_3_3 domain-containing protein OS=Malus domestica OX=3750 GN=DVH24_014430 PE=3 SV=1	85.38	0	99	SKVETELSAICAGILK	Carbamidomethyl(C)@11		missed K-V@2	0.00218315	1717.93	573.651	1717.93	573.65	3	9	1.1.1.2388.3	24.965	2311.61	617.44	25.31	0.35	406.848
tr|A0A498KN62|A0A498KN62_MALDO	14_3_3 domain-containing protein OS=Malus domestica OX=3750 GN=DVH24_014430 PE=3 SV=1	85.38	0	99	SKVETELSAICAGILK	Carbamidomethyl(C)@11		missed K-V@2	-0.00127784	1717.93	859.971	1717.93	859.971	2	17	1.1.1.2393.5	25.0931	1594.3	994.51	25.17	0.19	149.954
tr|A0A498KN62|A0A498KN62_MALDO	14_3_3 domain-containing protein OS=Malus domestica OX=3750 GN=DVH24_014430 PE=3 SV=1	85.38	0	30.08	SREQYVYLAK	Deamidated(Q)@4		cleaved L-S@N-term; missed R-E@2	0.0210089	1256.66	419.894	1256.64	419.887	3	8	1.1.1.1927.3	14.9881	405.15	393.74	14.96	0.33	234.002
tr|A0A498KN62|A0A498KN62_MALDO	14_3_3 domain-containing protein OS=Malus domestica OX=3750 GN=DVH24_014430 PE=3 SV=1	85.38	0	99	TAAEDTMVAYK	Oxidation(M)@7			-0.00335838	1214.55	608.28	1214.55	608.282	2	17	1.1.1.1765.2	11.4997	36541.3	6751.39	11.69	0.23	475.474
tr|A0A498KN62|A0A498KN62_MALDO	14_3_3 domain-containing protein OS=Malus domestica OX=3750 GN=DVH24_014430 PE=3 SV=1	85.38	0	99	TAAEDTMVAYK	Oxidation(M)@7			-0.00335838	1214.55	608.28	1214.55	608.282	2	16	1.1.1.1794.4	12.0044	36541.3	1120.14	11.69	0.23	104.07
tr|A0A498KN62|A0A498KN62_MALDO	14_3_3 domain-containing protein OS=Malus domestica OX=3750 GN=DVH24_014430 PE=3 SV=1	85.38	0	99	TAAEDTMVAYK	Dioxidation(M)@7	Dioxidation(M)@160		-0.00160076	1230.54	616.278	1230.54	616.279	2	12	1.1.1.1798.2	12.0647	724.47	461.17	12.21	0.29	50.4823
tr|A0A498KN62|A0A498KN62_MALDO	14_3_3 domain-containing protein OS=Malus domestica OX=3750 GN=DVH24_014430 PE=3 SV=1	85.38	0	99	TAAEDTMVAYK	Oxidation(M)@7			-0.0015273	1214.55	608.281	1214.55	608.282	2	15	1.1.1.1841.2	13.0611	767.2	522.16	13.24	0.74	68.7799
tr|A0A498KN62|A0A498KN62_MALDO	14_3_3 domain-containing protein OS=Malus domestica OX=3750 GN=DVH24_014430 PE=3 SV=1	85.38	0	99	TAAEDTMVAYK				-0.00218538	1198.55	600.283	1198.55	600.284	2	14	1.1.1.1900.5	14.3732	47080.3	645.27	14.65	0.24	180.646
tr|A0A498KN62|A0A498KN62_MALDO	14_3_3 domain-containing protein OS=Malus domestica OX=3750 GN=DVH24_014430 PE=3 SV=1	85.38	0	99	TAAEDTMVAYK				-0.000964658	1198.55	600.284	1198.55	600.284	2	10	1.1.1.1858.5	13.4339	367.27	353.19	13.46	0.28	53.9996
tr|A0A498KN62|A0A498KN62_MALDO	14_3_3 domain-containing protein OS=Malus domestica OX=3750 GN=DVH24_014430 PE=3 SV=1	85.38	0	99	TAAEDTMVAYK	Oxidation(M)@7			-0.000550729	1214.55	608.281	1214.55	608.282	2	11	1.1.1.1886.7	14.0915	691.69	579.76	14.01	0.85	91.7007
tr|A0A498KN62|A0A498KN62_MALDO	14_3_3 domain-containing protein OS=Malus domestica OX=3750 GN=DVH24_014430 PE=3 SV=1	85.38	0	99	TAAEDTMVAYK	Methyl(E)@4; Methyl(D)@5	Methyl(E)@157; Methyl(D)@158		-0.000765852	1226.58	614.3	1226.59	614.3	2	13	1.1.1.2049.9	17.67	4154.15	1755.47	17.84	0.26	338.923
tr|A0A498KN62|A0A498KN62_MALDO	14_3_3 domain-containing protein OS=Malus domestica OX=3750 GN=DVH24_014430 PE=3 SV=1	85.38	0	99	TAAEDTMVAYK	Carbamyl(M)@7			-0.000226529	1241.56	621.787	1241.56	621.787	2	10	1.1.1.1806.7	12.2552	860.88	369.24	12.4	0.26	56.2049
tr|A0A498KN62|A0A498KN62_MALDO	14_3_3 domain-containing protein OS=Malus domestica OX=3750 GN=DVH24_014430 PE=3 SV=1	85.38	0	99	TAAEDTMVAYK	Oxidation(M)@7			-0.0015273	1214.55	608.281	1214.55	608.282	2	9	1.1.1.1864.5	13.575	767.2	505.41	13.24	0.74	64.8508
tr|A0A498KN62|A0A498KN62_MALDO	14_3_3 domain-containing protein OS=Malus domestica OX=3750 GN=DVH24_014430 PE=3 SV=1	85.38	0	96.58	TAAEDTMVAYK	Oxidation(M)@7			-0.00311424	1214.55	608.28	1214.55	608.282	2	7	1.1.1.1732.2	10.9974	238.12	234.17	11.03	0.26	28.043
tr|A0A498KN62|A0A498KN62_MALDO	14_3_3 domain-containing protein OS=Malus domestica OX=3750 GN=DVH24_014430 PE=3 SV=1	85.38	0	66.34	TAAEDTMVAYK	Oxidation(M)@7			0.0248402	1214.57	608.294	1214.55	608.282	2	8	1.1.1.2040.5	17.4632	2563.58	439.89	17.18	0.31	259.494
tr|A0A498KN62|A0A498KN62_MALDO	14_3_3 domain-containing protein OS=Malus domestica OX=3750 GN=DVH24_014430 PE=3 SV=1	85.38	0	25.8	TAAEDTMVAYK	Hex(T)@6	Hex(T)@159		0.0111378	1360.62	681.316	1360.61	681.311	2	7	1.1.1.1763.3	11.4708	345.97	338.83	11.48	0.24	27.3996
tr|A0A498KN62|A0A498KN62_MALDO	14_3_3 domain-containing protein OS=Malus domestica OX=3750 GN=DVH24_014430 PE=3 SV=1	85.38	0	25.8	TAAEDTMVAYK	Hex(T)@1	Hex(T)@154		0.0111378	1360.62	681.316	1360.61	681.311	2	7	1.1.1.1763.3	11.4708	345.97	338.83	11.48	0.24	27.3996
tr|A0A498KN62|A0A498KN62_MALDO	14_3_3 domain-containing protein OS=Malus domestica OX=3750 GN=DVH24_014430 PE=3 SV=1	85.38	0	22.61	TAAEDTMVAYK	Lys-add@N-term; Carbamyl(M)@7			3.73914e-05	1369.65	457.559	1369.65	457.559	3	13	1.1.1.1734.2	11.0271	414.86	319.34	11.12	0.24	61.1772
tr|A0A498KN62|A0A498KN62_MALDO	14_3_3 domain-containing protein OS=Malus domestica OX=3750 GN=DVH24_014430 PE=3 SV=1	85.38	0	32.72	VFYLKMK	Carbamyl(K)@5; Oxidation(M)@6		missed K-M@5	0.000713452	986.527	494.271	986.526	494.27	2	9	1.1.1.2074.2	18.2436	5356.37	3794.9	18.1	0.39	852.32
tr|A0A498KN62|A0A498KN62_MALDO	14_3_3 domain-containing protein OS=Malus domestica OX=3750 GN=DVH24_014430 PE=3 SV=1	85.38	0	99	YEEMVSFMEK	Oxidation(M)@4; Oxidation(M)@8			9.87478e-05	1323.54	662.775	1323.54	662.775	2	13	1.1.1.1951.7	15.523	3894.34	1523.57	15.73	0.4	203.12
tr|A0A498KN62|A0A498KN62_MALDO	14_3_3 domain-containing protein OS=Malus domestica OX=3750 GN=DVH24_014430 PE=3 SV=1	85.38	0	99	YEEMVSFMEK	Oxidation(M)@4; Oxidation(M)@8			9.87478e-05	1323.54	662.775	1323.54	662.775	2	15	1.1.1.1974.2	16.0264	3894.34	1506.01	15.73	0.4	220.458
tr|A0A498KN62|A0A498KN62_MALDO	14_3_3 domain-containing protein OS=Malus domestica OX=3750 GN=DVH24_014430 PE=3 SV=1	85.38	0	99	YEEMVSFMEK	Oxidation(M)@4			-0.000199005	1307.54	654.778	1307.54	654.778	2	14	1.1.1.2074.4	18.252	5186.78	1466.25	18.45	0.36	194.733
tr|A0A498KN62|A0A498KN62_MALDO	14_3_3 domain-containing protein OS=Malus domestica OX=3750 GN=DVH24_014430 PE=3 SV=1	85.38	0	99	YEEMVSFMEK				-0.00122837	1291.55	646.78	1291.55	646.781	2	14	1.1.1.2234.4	21.6835	11743.7	1810.12	21.99	0.35	217.922
tr|A0A498KN62|A0A498KN62_MALDO	14_3_3 domain-containing protein OS=Malus domestica OX=3750 GN=DVH24_014430 PE=3 SV=1	85.38	0	99	YEEMVSFMEK	Delta:H(4)C(2)@N-term			-0.000776587	1319.58	660.796	1319.58	660.796	2	14	1.1.1.2375.3	24.6911	3977.98	2445.8	24.86	0.35	375.334
tr|A0A498KN62|A0A498KN62_MALDO	14_3_3 domain-containing protein OS=Malus domestica OX=3750 GN=DVH24_014430 PE=3 SV=1	85.38	0	98.63	YEEMVSFMEK	Oxidation(M)@8			-0.000199005	1307.54	654.778	1307.54	654.778	2	9	1.1.1.2098.9	18.773	5186.78	1211.23	18.45	0.36	260.09
tr|A0A498KN62|A0A498KN62_MALDO	14_3_3 domain-containing protein OS=Malus domestica OX=3750 GN=DVH24_014430 PE=3 SV=1	85.38	0	92.86	YEEMVSFMEK	Delta:H(4)C(2)@N-term; Oxidation(M)@4			0.00416051	1335.58	668.796	1335.57	668.794	2	10	1.1.1.2190.3	20.7851	638.13	570.8	20.73	0.35	124.166
tr|A0A498KN62|A0A498KN62_MALDO	14_3_3 domain-containing protein OS=Malus domestica OX=3750 GN=DVH24_014430 PE=3 SV=1	85.38	0	90.66	YEEMVSFMEK	Delta:H(4)C(2)@N-term; Oxidation(M)@4; Oxidation(M)@8			-0.000911508	1351.57	676.791	1351.57	676.791	2	9	1.1.1.2057.8	17.8619	2054.1	658.76	18.05	0.28	99.0472
tr|A0A498KN62|A0A498KN62_MALDO	14_3_3 domain-containing protein OS=Malus domestica OX=3750 GN=DVH24_014430 PE=3 SV=1	85.38	0	21.16	YEEMVSFMEK	Dioxidation(M)@4; Oxidation(M)@8	Dioxidation(M)@30		0.00210631	1339.53	670.774	1339.53	670.773	2	7	1.1.1.1995.4	16.4983	126.345	126.345			99.0782
tr|A0A498KN62|A0A498KN62_MALDO	14_3_3 domain-containing protein OS=Malus domestica OX=3750 GN=DVH24_014430 PE=3 SV=1	85.38	0	99	YLAEFKNGDER	Deamidated(N)@7		missed K-N@6	-0.00216057	1341.62	671.816	1341.62	671.817	2	9	1.1.1.1910.16	14.5987	2221.39	489.75	14.82	0.35	84.1732

## Sheet: Spot 7
Accession #	Name
tr|A0A498IWZ8|A0A498IWZ8_MALDO	Phosphoglycerate kinase OS=Malus domestica OX=3750 GN=DVH24_021907 PE=3 SV=1
Accessions	Names	%Cov(95)	Contrib	Conf	Sequence	Modifications	ProteinModifications	Cleavages	dMass	Obs MW	Obs m/z	Theor MW	Theor m/z	Theor z	Sc	Spectrum	Acq Time	Intensity (Peptide)	PrecursorIntensityAcquisition	Apex Time (Peptide)	Elution Peak Width (Peptide)	MS2Counts
tr|A0A498IWZ8|A0A498IWZ8_MALDO	Phosphoglycerate kinase OS=Malus domestica OX=3750 GN=DVH24_021907 PE=3 SV=1	74.56	2	99	AQGHSVGSSLVEEDKLDLAK			missed K-L@15	-0.00114567	2082.06	521.522	2082.06	521.522	4	20	1.1.1.2097.3	17.8891	5911.35	3376.67	18.13	0.51	1226.69
tr|A0A498IWZ8|A0A498IWZ8_MALDO	Phosphoglycerate kinase OS=Malus domestica OX=3750 GN=DVH24_021907 PE=3 SV=1	74.56	2	99	ELDYLVGAVSNPK				0.000482924	1403.73	468.917	1403.73	468.917	3	14	1.1.1.2288.4	21.7297	10205.1	7711.21	21.81	0.28	524.945
tr|A0A498IWZ8|A0A498IWZ8_MALDO	Phosphoglycerate kinase OS=Malus domestica OX=3750 GN=DVH24_021907 PE=3 SV=1	74.56	2	99	FAAGTEAIAK				0.000150078	977.518	489.766	977.518	489.766	2	12	1.1.1.1898.4	13.4628	40536.5	1344.72	13.74	0.21	117.419
tr|A0A498IWZ8|A0A498IWZ8_MALDO	Phosphoglycerate kinase OS=Malus domestica OX=3750 GN=DVH24_021907 PE=3 SV=1	74.56	2	99	GVSILLPTDVVIADKFAADANSK			missed K-F@15	-0.000685695	2343.27	782.097	2343.27	782.097	3	13	1.1.1.2574.15	28.4391	4055.87	3560.8	28.52	0.29	214.961
tr|A0A498IWZ8|A0A498IWZ8_MALDO	Phosphoglycerate kinase OS=Malus domestica OX=3750 GN=DVH24_021907 PE=3 SV=1	74.56	2	99	GVTTIIGGGDSVAAVEK				0.00150626	1572.84	525.286	1572.84	525.286	3	18	1.1.1.2178.8	19.5166	27412.7	23053.4	19.6	0.28	1283.77
tr|A0A498IWZ8|A0A498IWZ8_MALDO	Phosphoglycerate kinase OS=Malus domestica OX=3750 GN=DVH24_021907 PE=3 SV=1	74.56	2	99	GVTTIIGGGDSVAAVEKAGLAEK	Carbamyl(K)@17		missed K-A@17	0.00420198	2185.16	729.395	2185.16	729.394	3	14	1.1.1.2394.8	24.2253	1753.56	1464.43	24.16	0.23	405.502
tr|A0A498IWZ8|A0A498IWZ8_MALDO	Phosphoglycerate kinase OS=Malus domestica OX=3750 GN=DVH24_021907 PE=3 SV=1	74.56	2	99	IANDCIGEEVEK	Carbamidomethyl(C)@5			-0.00091943	1375.63	688.821	1375.63	688.822	2	16	1.1.1.1965.8	15.0146	12970.6	1725.08	14.78	0.26	151.172
tr|A0A498IWZ8|A0A498IWZ8_MALDO	Phosphoglycerate kinase OS=Malus domestica OX=3750 GN=DVH24_021907 PE=3 SV=1	74.56	2	99	IGVIESLLAK				-0.000638622	1041.64	521.829	1041.64	521.829	2	16	1.1.1.2478.2	26.1654	27574.2	8884.74	25.88	0.42	713.224
tr|A0A498IWZ8|A0A498IWZ8_MALDO	Phosphoglycerate kinase OS=Malus domestica OX=3750 GN=DVH24_021907 PE=3 SV=1	74.56	2	99	LASLADVYVNDAFGTAHR	Deamidated(N)@10			0.00798089	1919.95	640.989	1919.94	640.987	3	12	1.1.1.2361.11	23.4526	1475.48	1436.76	23.44	0.3	206.315
tr|A0A498IWZ8|A0A498IWZ8_MALDO	Phosphoglycerate kinase OS=Malus domestica OX=3750 GN=DVH24_021907 PE=3 SV=1	74.56	2	99	LSELLGLEVK				0.000306876	1099.65	550.832	1099.65	550.832	2	13	1.1.1.2355.9	23.3109	67877.1	2155.42	23.65	0.37	358.328
tr|A0A498IWZ8|A0A498IWZ8_MALDO	Phosphoglycerate kinase OS=Malus domestica OX=3750 GN=DVH24_021907 PE=3 SV=1	74.56	2	99	LVAQLPEGGVLLLENVR				0.00037946	1819.06	607.36	1819.06	607.359	3	20	1.1.1.2603.11	29.1356	27786.2	23857.7	29.2	0.32	2699.45
tr|A0A498IWZ8|A0A498IWZ8_MALDO	Phosphoglycerate kinase OS=Malus domestica OX=3750 GN=DVH24_021907 PE=3 SV=1	74.56	2	99	MSHISTGGGASLELLEGK	Oxidation(M)@1			0.000998131	1801.89	601.637	1801.89	601.637	3	17	1.1.1.2212.5	20.1936	4342.03	1462.38	20.41	0.35	557.41
tr|A0A498IWZ8|A0A498IWZ8_MALDO	Phosphoglycerate kinase OS=Malus domestica OX=3750 GN=DVH24_021907 PE=3 SV=1	74.56	2	99	PFAAIVGGSK			cleaved R-P@N-term	0.000111436	945.529	473.772	945.528	473.771	2	11	1.1.1.2050.3	16.9609	3789.96	1224.12	17.21	0.33	256.297
tr|A0A498IWZ8|A0A498IWZ8_MALDO	Phosphoglycerate kinase OS=Malus domestica OX=3750 GN=DVH24_021907 PE=3 SV=1	74.56	2	99	RPFAAIVGGSK				-6.70414e-05	1101.63	551.822	1101.63	551.822	2	12	1.1.1.2017.6	16.2191	5392.7	4909.02	16.13	0.46	304.637
tr|A0A498IWZ8|A0A498IWZ8_MALDO	Phosphoglycerate kinase OS=Malus domestica OX=3750 GN=DVH24_021907 PE=3 SV=1	74.56	2	99	SVSTLKEAELK	Carbamyl(K)@6		missed K-E@6	-0.00132855	1246.68	624.345	1246.68	624.346	2	16	1.1.1.2068.3	17.2864	3506.25	1914.17	17.39	0.28	294.179
tr|A0A498IWZ8|A0A498IWZ8_MALDO	Phosphoglycerate kinase OS=Malus domestica OX=3750 GN=DVH24_021907 PE=3 SV=1	74.56	2	99	TLPGVLALDDA				0.000321016	1083.58	542.798	1083.58	542.798	2	16	1.1.1.2474.4	26.0811	12416.1	6310.09	25.84	0.32	506.941
tr|A0A498IWZ8|A0A498IWZ8_MALDO	Phosphoglycerate kinase OS=Malus domestica OX=3750 GN=DVH24_021907 PE=3 SV=1	74.56	2	99	VDLNVPLDDNSNITDDTR				0.00195548	2014.95	672.656	2014.94	672.655	3	25	1.1.1.2273.6	21.381	28153.2	18174.9	21.23	0.28	3988.15
tr|A0A498IWZ8|A0A498IWZ8_MALDO	Phosphoglycerate kinase OS=Malus domestica OX=3750 GN=DVH24_021907 PE=3 SV=1	74.56	2	99	VILASHLGR			cleaved R-P@C-term	-0.000672498	964.581	483.298	964.582	483.298	2	11	1.1.1.1968.3	15.0813	3956.95	1512.76	14.9	0.31	220.414
tr|A0A498IWZ8|A0A498IWZ8_MALDO	Phosphoglycerate kinase OS=Malus domestica OX=3750 GN=DVH24_021907 PE=3 SV=1	74.56	2	99	VVPASAIPDGWMGLDIGPDSIK				-0.0017438	2237.14	746.72	2237.14	746.721	3	11	1.1.1.2630.12	29.8051	8306.48	1748.02	29.57	0.25	327.19
tr|A0A498IWZ8|A0A498IWZ8_MALDO	Phosphoglycerate kinase OS=Malus domestica OX=3750 GN=DVH24_021907 PE=3 SV=1	74.56	2	99	YLKPSVAGF			cleaved F-L@C-term	0.00281209	980.536	491.275	980.533	491.274	2	10	1.1.1.2215.3	20.2546	842.82	610.37	20.17	0.28	160.849
tr|A0A498IWZ8|A0A498IWZ8_MALDO	Phosphoglycerate kinase OS=Malus domestica OX=3750 GN=DVH24_021907 PE=3 SV=1	74.56	2	99	YLKPSVAGFLMQK	Oxidation(M)@11			0.00218585	1496.81	499.943	1496.81	499.943	3	11	1.1.1.2293.11	21.8473	8852.45	7859.82	21.79	0.4	748.527
tr|A0A498IWZ8|A0A498IWZ8_MALDO	Phosphoglycerate kinase OS=Malus domestica OX=3750 GN=DVH24_021907 PE=3 SV=1	74.56	2	99	YLLGHGAK				-6.22069e-05	857.476	429.745	857.476	429.745	2	9	1.1.1.1798.2	11.3904	3070.64	3040.77	11.4	0.36	468.49
tr|A0A498IWZ8|A0A498IWZ8_MALDO	Phosphoglycerate kinase OS=Malus domestica OX=3750 GN=DVH24_021907 PE=3 SV=1	74.56	2	99	YSLKPLVPR				-0.00140164	1071.64	536.829	1071.64	536.829	2	10	1.1.1.2105.3	18.0735	8043.23	3872.63	17.78	0.37	216.522
tr|A0A498IWZ8|A0A498IWZ8_MALDO	Phosphoglycerate kinase OS=Malus domestica OX=3750 GN=DVH24_021907 PE=3 SV=1	74.56	1.22185	95.17	GVSILLPTDVVIADK				0.00191792	1538.89	770.454	1538.89	770.453	2	6	1.1.1.2522.18	27.2028	7582.89	2480.02	26.86	0.33	280.05
tr|A0A498IWZ8|A0A498IWZ8_MALDO	Phosphoglycerate kinase OS=Malus domestica OX=3750 GN=DVH24_021907 PE=3 SV=1	74.56	0.60206	99	FAAGTEAIAKK	Carbamyl(K)@10		missed K-K@10	-0.000955497	1148.62	575.316	1148.62	575.317	2	11	1.1.1.1945.5	14.5345	1146.77	407.86	14.71	0.26	75.3958
tr|A0A498IWZ8|A0A498IWZ8_MALDO	Phosphoglycerate kinase OS=Malus domestica OX=3750 GN=DVH24_021907 PE=3 SV=1	74.56	0.600326	99	VNVLLLGGGMIF	Oxidation(M)@10		cleaved F-T@C-term	-0.00148004	1247.69	624.854	1247.69	624.855	2	11	1.1.1.2648.9	30.2499	2265.74	1964.7	30.27	0.06	418.784
tr|A0A498IWZ8|A0A498IWZ8_MALDO	Phosphoglycerate kinase OS=Malus domestica OX=3750 GN=DVH24_021907 PE=3 SV=1	74.56	0.20412	43.24	FYKEEEKNDPEFAK			missed K-E@3; missed K-N@7	0.000647935	1772.83	444.214	1772.83	444.214	4	7	1.1.1.1895.2	13.3959	670.93	667.45	13.38	0.81	181.57
tr|A0A498IWZ8|A0A498IWZ8_MALDO	Phosphoglycerate kinase OS=Malus domestica OX=3750 GN=DVH24_021907 PE=3 SV=1	74.56	0.0685421	98.92	AQGHSVGSSL			cleaved L-V@C-term	-0.000392601	941.456	471.735	941.457	471.736	2	7	1.1.1.1756.2	10.9685	337.02	316.93	11.03	0.26	45.6846
tr|A0A498IWZ8|A0A498IWZ8_MALDO	Phosphoglycerate kinase OS=Malus domestica OX=3750 GN=DVH24_021907 PE=3 SV=1	74.56	0.00217692	61.25	KLAELSGK	Carbamyl@N-term		missed K-L@1	-0.00105613	887.507	444.761	887.508	444.761	2	8	1.1.1.1879.2	13.0614	2383.71	1168.11	13.22	0.3	351.596
tr|A0A498IWZ8|A0A498IWZ8_MALDO	Phosphoglycerate kinase OS=Malus domestica OX=3750 GN=DVH24_021907 PE=3 SV=1	74.56	0.000434506	46.7	RPFAAIVGGSKVSTK	Carbamyl(K)@11		missed K-V@11	0.00118419	1559.88	520.967	1559.88	520.967	3	7	1.1.1.2083.6	17.6338	1241.12	792.8	17.7	0.17	339.402
tr|A0A498IWZ8|A0A498IWZ8_MALDO	Phosphoglycerate kinase OS=Malus domestica OX=3750 GN=DVH24_021907 PE=3 SV=1	74.56	0	99	AQGHSVGSSLVEEDKLDLAK			missed K-L@15	-0.00292687	2082.06	695.026	2082.06	695.027	3	13	1.1.1.2116.8	18.3356	1932.85	1603.29	18.27	0.23	255.373
tr|A0A498IWZ8|A0A498IWZ8_MALDO	Phosphoglycerate kinase OS=Malus domestica OX=3750 GN=DVH24_021907 PE=3 SV=1	74.56	0	99	AQGHSVGSSLVEEDKLDLAK			missed K-L@15	0.00274941	2082.06	695.028	2082.06	695.027	3	11	1.1.1.2093.3	17.8227	2645.01	1164.81	18.04	0.39	184.825
tr|A0A498IWZ8|A0A498IWZ8_MALDO	Phosphoglycerate kinase OS=Malus domestica OX=3750 GN=DVH24_021907 PE=3 SV=1	74.56	0	71.85	AQGHSVGSSLVEEDKLDLAK			missed K-L@15	-0.00114567	2082.06	521.522	2082.06	521.522	4	9	1.1.1.2119.3	18.3922	5911.35	2532.29	18.13	0.51	495.128
tr|A0A498IWZ8|A0A498IWZ8_MALDO	Phosphoglycerate kinase OS=Malus domestica OX=3750 GN=DVH24_021907 PE=3 SV=1	74.56	0	99	ELDYLVGAVSNPK				0.000482924	1403.73	468.917	1403.73	468.917	3	17	1.1.1.2285.4	21.6621	10205.1	3917.7	21.81	0.28	1536.9
tr|A0A498IWZ8|A0A498IWZ8_MALDO	Phosphoglycerate kinase OS=Malus domestica OX=3750 GN=DVH24_021907 PE=3 SV=1	74.56	0	99	ELDYLVGAVSNPK				0.00340317	1403.73	702.874	1403.73	702.872	2	19	1.1.1.2285.5	21.6655	64232.8	28577	21.86	0.28	2302.59
tr|A0A498IWZ8|A0A498IWZ8_MALDO	Phosphoglycerate kinase OS=Malus domestica OX=3750 GN=DVH24_021907 PE=3 SV=1	74.56	0	99	ELDYLVGAVSNPK				0.00340317	1403.73	702.874	1403.73	702.872	2	18	1.1.1.2307.9	22.1855	64232.8	3511.81	21.86	0.28	296.87
tr|A0A498IWZ8|A0A498IWZ8_MALDO	Phosphoglycerate kinase OS=Malus domestica OX=3750 GN=DVH24_021907 PE=3 SV=1	74.56	0	99	ELDYLVGAVSNPK	Glu->pyro-Glu@N-term			-0.000401341	1385.72	693.867	1385.72	693.867	2	12	1.1.1.2551.11	27.8825	1498.8	1111.03	27.73	0.33	169.053
tr|A0A498IWZ8|A0A498IWZ8_MALDO	Phosphoglycerate kinase OS=Malus domestica OX=3750 GN=DVH24_021907 PE=3 SV=1	74.56	0	88.04	ELDYLVGAVSNPK				0.000482924	1403.73	468.917	1403.73	468.917	3	9	1.1.1.2307.4	22.1772	10205.1	609.49	21.81	0.28	737.763
tr|A0A498IWZ8|A0A498IWZ8_MALDO	Phosphoglycerate kinase OS=Malus domestica OX=3750 GN=DVH24_021907 PE=3 SV=1	74.56	0	46.42	ELDYLVGAVSNPK	Deamidated(N)@11			0.0193379	1404.73	469.252	1404.71	469.245	3	7	1.1.1.2293.7	21.844	3596.71	2886.16	21.91	0.14	1020.7
tr|A0A498IWZ8|A0A498IWZ8_MALDO	Phosphoglycerate kinase OS=Malus domestica OX=3750 GN=DVH24_021907 PE=3 SV=1	74.56	0	99	FAAGTEAIAK				0.000150078	977.518	489.766	977.518	489.766	2	13	1.1.1.1920.6	13.9658	40536.5	5014.52	13.74	0.21	437.374
tr|A0A498IWZ8|A0A498IWZ8_MALDO	Phosphoglycerate kinase OS=Malus domestica OX=3750 GN=DVH24_021907 PE=3 SV=1	74.56	0	37.42	FAAGTEAIAK	Delta:H(4)C(2)(K)@10			-0.001923	1005.55	503.781	1005.55	503.782	2	7	1.1.1.2047.4	16.8875	3041.85	1737.97	17	0.28	212.193
tr|A0A498IWZ8|A0A498IWZ8_MALDO	Phosphoglycerate kinase OS=Malus domestica OX=3750 GN=DVH24_021907 PE=3 SV=1	74.56	0	31.32	FAAGTEAIAK	Dimethyl(K)@10	Dimethyl(K)@341		-0.001923	1005.55	503.781	1005.55	503.782	2	7	1.1.1.2047.4	16.8875	3041.85	1737.97	17	0.28	212.193
tr|A0A498IWZ8|A0A498IWZ8_MALDO	Phosphoglycerate kinase OS=Malus domestica OX=3750 GN=DVH24_021907 PE=3 SV=1	74.56	0	99	FAAGTEAIAKK			missed K-K@10	0.000389551	1105.61	553.814	1105.61	553.814	2	8	1.1.1.1817.2	11.7792	1045.76	369.36	11.95	0.24	34.1964
tr|A0A498IWZ8|A0A498IWZ8_MALDO	Phosphoglycerate kinase OS=Malus domestica OX=3750 GN=DVH24_021907 PE=3 SV=1	74.56	0	94.59	GVSILLPTDVVIADK				0.00191792	1538.89	770.454	1538.89	770.453	2	6	1.1.1.2500.13	26.6885	7582.89	2251.19	26.86	0.33	315.963
tr|A0A498IWZ8|A0A498IWZ8_MALDO	Phosphoglycerate kinase OS=Malus domestica OX=3750 GN=DVH24_021907 PE=3 SV=1	74.56	0	99	GVTTIIGGGDSVAAVEK				0.00176187	1572.84	787.426	1572.84	787.425	2	21	1.1.1.2166.3	19.265	80271.6	1599.7	19.6	0.31	253.992
tr|A0A498IWZ8|A0A498IWZ8_MALDO	Phosphoglycerate kinase OS=Malus domestica OX=3750 GN=DVH24_021907 PE=3 SV=1	74.56	0	99	GVTTIIGGGDSVAAVEK				0.00176187	1572.84	787.426	1572.84	787.425	2	29	1.1.1.2189.3	19.7848	80271.6	22921.3	19.6	0.31	1610.05
tr|A0A498IWZ8|A0A498IWZ8_MALDO	Phosphoglycerate kinase OS=Malus domestica OX=3750 GN=DVH24_021907 PE=3 SV=1	74.56	0	69.89	GVTTIIGGGDSVAAVEK	Delta:H(4)C(2)(K)@17			0.00089612	1600.87	801.441	1600.87	801.441	2	8	1.1.1.2328.18	22.6822	5084.33	704.26	22.95	0.28	220.109
tr|A0A498IWZ8|A0A498IWZ8_MALDO	Phosphoglycerate kinase OS=Malus domestica OX=3750 GN=DVH24_021907 PE=3 SV=1	74.56	0	58.2	GVTTIIGGGDSVAAVEK	Delta:H(4)C(2)(K)@17			0.00089612	1600.87	801.441	1600.87	801.441	2	8	1.1.1.2350.12	23.1988	5084.33	817.26	22.95	0.28	158.588
tr|A0A498IWZ8|A0A498IWZ8_MALDO	Phosphoglycerate kinase OS=Malus domestica OX=3750 GN=DVH24_021907 PE=3 SV=1	74.56	0	45.3	GVTTIIGGGDSVAAVEK	Dimethyl(K)@17	Dimethyl(K)@366		0.00089612	1600.87	801.441	1600.87	801.441	2	8	1.1.1.2328.18	22.6822	5084.33	704.26	22.95	0.28	220.109
tr|A0A498IWZ8|A0A498IWZ8_MALDO	Phosphoglycerate kinase OS=Malus domestica OX=3750 GN=DVH24_021907 PE=3 SV=1	74.56	0	44.19	GVTTIIGGGDSVAAVEK	Dimethyl(K)@17	Dimethyl(K)@366		0.00089612	1600.87	801.441	1600.87	801.441	2	8	1.1.1.2350.12	23.1988	5084.33	817.26	22.95	0.28	158.588
tr|A0A498IWZ8|A0A498IWZ8_MALDO	Phosphoglycerate kinase OS=Malus domestica OX=3750 GN=DVH24_021907 PE=3 SV=1	74.56	0	99	IANDCIGEEVEK	Deamidated(N)@3; Carbamidomethyl(C)@5			0.000418052	1376.61	689.314	1376.61	689.314	2	11	1.1.1.1987.13	15.5247	982.56	980.69	15.51	0.33	110.411
tr|A0A498IWZ8|A0A498IWZ8_MALDO	Phosphoglycerate kinase OS=Malus domestica OX=3750 GN=DVH24_021907 PE=3 SV=1	74.56	0	99	IANDCIGEEVEK	Carbamidomethyl(C)@5; Methyl(E)@8; Methyl(E)@9	Methyl(E)@101; Methyl(E)@102		0.00334525	1403.66	702.839	1403.66	702.837	2	12	1.1.1.2047.7	16.895	1241.49	1146.4	16.9	0.17	120.387
tr|A0A498IWZ8|A0A498IWZ8_MALDO	Phosphoglycerate kinase OS=Malus domestica OX=3750 GN=DVH24_021907 PE=3 SV=1	74.56	0	99	IANDCIGEEVEK	Carbamidomethyl(C)@5			-0.00091943	1375.63	688.821	1375.63	688.822	2	8	1.1.1.1943.7	14.4908	12970.6	680.11	14.78	0.26	54.9055
tr|A0A498IWZ8|A0A498IWZ8_MALDO	Phosphoglycerate kinase OS=Malus domestica OX=3750 GN=DVH24_021907 PE=3 SV=1	74.56	0	90.47	IANDCIGEEVEK	Methyl(D)@4; Carbamidomethyl(C)@5	Methyl(D)@97		-0.000312904	1389.64	695.829	1389.64	695.83	2	8	1.1.1.1959.6	14.8713	2903.47	576.34	15.07	0.24	50.7075
tr|A0A498IWZ8|A0A498IWZ8_MALDO	Phosphoglycerate kinase OS=Malus domestica OX=3750 GN=DVH24_021907 PE=3 SV=1	74.56	0	58.53	IANDCIGEEVEK	Carbamidomethyl(C)@5			0.0039607	1375.63	459.552	1375.63	459.55	3	8	1.1.1.1962.4	14.936	1050.48	380.95	14.76	0.29	262.807
tr|A0A498IWZ8|A0A498IWZ8_MALDO	Phosphoglycerate kinase OS=Malus domestica OX=3750 GN=DVH24_021907 PE=3 SV=1	74.56	0	99	IGVIESLLAK				-0.000638622	1041.64	521.829	1041.64	521.829	2	14	1.1.1.2456.5	25.6562	27574.2	14349.2	25.88	0.42	1055.23
tr|A0A498IWZ8|A0A498IWZ8_MALDO	Phosphoglycerate kinase OS=Malus domestica OX=3750 GN=DVH24_021907 PE=3 SV=1	74.56	0	31.99	KLAELSGK	Carbamyl(K)@1		missed K-L@1	-0.00105613	887.507	444.761	887.508	444.761	2	8	1.1.1.1879.2	13.0614	2383.71	1168.11	13.22	0.3	351.596
tr|A0A498IWZ8|A0A498IWZ8_MALDO	Phosphoglycerate kinase OS=Malus domestica OX=3750 GN=DVH24_021907 PE=3 SV=1	74.56	0	99	LASLADVYVNDAFGTAHR				0.000712437	1918.95	640.659	1918.95	640.659	3	19	1.1.1.2435.5	25.1725	17799.5	9883.27	24.95	0.4	1090.28
tr|A0A498IWZ8|A0A498IWZ8_MALDO	Phosphoglycerate kinase OS=Malus domestica OX=3750 GN=DVH24_021907 PE=3 SV=1	74.56	0	99	LASLADVYVNDAFGTAHR				0.000712437	1918.95	640.659	1918.95	640.659	3	17	1.1.1.2438.6	25.2462	17799.5	5236.1	24.95	0.4	1305.01
tr|A0A498IWZ8|A0A498IWZ8_MALDO	Phosphoglycerate kinase OS=Malus domestica OX=3750 GN=DVH24_021907 PE=3 SV=1	74.56	0	99	LASLADVYVNDAFGTAHR				0.000712437	1918.95	640.659	1918.95	640.659	3	11	1.1.1.2413.9	24.6635	17799.5	2182.23	24.95	0.4	322.96
tr|A0A498IWZ8|A0A498IWZ8_MALDO	Phosphoglycerate kinase OS=Malus domestica OX=3750 GN=DVH24_021907 PE=3 SV=1	74.56	0	97.87	LASLADVYVNDAFGTAHR	Deamidated(N)@10			0.0292463	1919.97	480.999	1919.94	480.992	4	10	1.1.1.2431.4	25.0772	957.3	531.26	24.95	0.21	724.45
tr|A0A498IWZ8|A0A498IWZ8_MALDO	Phosphoglycerate kinase OS=Malus domestica OX=3750 GN=DVH24_021907 PE=3 SV=1	74.56	0	99	LSELLGLEVK				0.000306876	1099.65	550.832	1099.65	550.832	2	17	1.1.1.2377.7	23.8225	67877.1	45191.8	23.65	0.37	3465.12
tr|A0A498IWZ8|A0A498IWZ8_MALDO	Phosphoglycerate kinase OS=Malus domestica OX=3750 GN=DVH24_021907 PE=3 SV=1	74.56	0	99	LSELLGLEVK				0.000306876	1099.65	550.832	1099.65	550.832	2	11	1.1.1.2368.6	23.6108	67877.1	65471.5	23.65	0.37	1333.63
tr|A0A498IWZ8|A0A498IWZ8_MALDO	Phosphoglycerate kinase OS=Malus domestica OX=3750 GN=DVH24_021907 PE=3 SV=1	74.56	0	66.77	LSELLGLEVK	Delta:H(4)C(2)(K)@10			0.00035712	1127.68	564.847	1127.68	564.847	2	9	1.1.1.2498.3	26.6309	2584.96	2518.66	26.58	0.44	233.383
tr|A0A498IWZ8|A0A498IWZ8_MALDO	Phosphoglycerate kinase OS=Malus domestica OX=3750 GN=DVH24_021907 PE=3 SV=1	74.56	0	49.87	LSELLGLEVK				0.000306876	1099.65	550.832	1099.65	550.832	2	6	1.1.1.2399.9	24.332	67877.1	1268.68	23.65	0.37	182.812
tr|A0A498IWZ8|A0A498IWZ8_MALDO	Phosphoglycerate kinase OS=Malus domestica OX=3750 GN=DVH24_021907 PE=3 SV=1	74.56	0	44.42	LSELLGLEVK	Dimethyl(K)@10	Dimethyl(K)@93		0.00035712	1127.68	564.847	1127.68	564.847	2	9	1.1.1.2498.3	26.6309	2584.96	2518.66	26.58	0.44	233.383
tr|A0A498IWZ8|A0A498IWZ8_MALDO	Phosphoglycerate kinase OS=Malus domestica OX=3750 GN=DVH24_021907 PE=3 SV=1	74.56	0	99	LVAQLPEGGVLLLENVR	Deamidated(Q)@4			0.00348298	1820.04	607.689	1820.04	607.688	3	17	1.1.1.2623.11	29.6279	4526.66	3719.45	29.54	0.25	1203.66
tr|A0A498IWZ8|A0A498IWZ8_MALDO	Phosphoglycerate kinase OS=Malus domestica OX=3750 GN=DVH24_021907 PE=3 SV=1	74.56	0	97.87	LVAQLPEGGVLLLENVR				0.00283609	1819.06	455.772	1819.06	455.771	4	9	1.1.1.2606.2	29.2014	364.69	362.58	29.22	0.17	402.342
tr|A0A498IWZ8|A0A498IWZ8_MALDO	Phosphoglycerate kinase OS=Malus domestica OX=3750 GN=DVH24_021907 PE=3 SV=1	74.56	0	39.06	LVAQLPEGGVLLLENVR				-0.00071917	1819.06	607.359	1819.06	607.359	3	5	1.1.1.2572.4	28.3801	620.58	442.29	28.23	0.48	180.647
tr|A0A498IWZ8|A0A498IWZ8_MALDO	Phosphoglycerate kinase OS=Malus domestica OX=3750 GN=DVH24_021907 PE=3 SV=1	74.56	0	39.06	LVAQLPEGGVLLLENVR				0.00037946	1819.06	607.36	1819.06	607.359	3	6	1.1.1.2627.12	29.7282	27786.2	796.49	29.2	0.32	301.24
tr|A0A498IWZ8|A0A498IWZ8_MALDO	Phosphoglycerate kinase OS=Malus domestica OX=3750 GN=DVH24_021907 PE=3 SV=1	74.56	0	99	MSHISTGGGASLELLEGK				-0.000756874	1785.89	596.305	1785.89	596.305	3	14	1.1.1.2274.12	21.4074	3003.69	1581.26	21.25	0.33	236.101
tr|A0A498IWZ8|A0A498IWZ8_MALDO	Phosphoglycerate kinase OS=Malus domestica OX=3750 GN=DVH24_021907 PE=3 SV=1	74.56	0	95.62	MSHISTGGGASLELLEGK				-0.000756874	1785.89	596.305	1785.89	596.305	3	9	1.1.1.2251.6	20.8863	3003.69	264.07	21.25	0.33	119.525
tr|A0A498IWZ8|A0A498IWZ8_MALDO	Phosphoglycerate kinase OS=Malus domestica OX=3750 GN=DVH24_021907 PE=3 SV=1	74.56	0	44.74	MSHISTGGGASLELLEGK	Oxidation(M)@1			0.000998131	1801.89	601.637	1801.89	601.637	3	7	1.1.1.2220.11	20.3727	4342.03	4059.06	20.41	0.35	328.207
tr|A0A498IWZ8|A0A498IWZ8_MALDO	Phosphoglycerate kinase OS=Malus domestica OX=3750 GN=DVH24_021907 PE=3 SV=1	74.56	0	61.25	PRLSELLGLEVK	Oxidation(P)@1; Dioxidation(R)@2	Oxidation(P)@82; Dioxidation(R)@83	cleaved V-P@N-term; missed R-L@2	0.0231863	1400.81	701.413	1400.79	701.401	2	9	1.1.1.2366.11	23.5658	592.32	553.63	23.55	0.28	134.449
tr|A0A498IWZ8|A0A498IWZ8_MALDO	Phosphoglycerate kinase OS=Malus domestica OX=3750 GN=DVH24_021907 PE=3 SV=1	74.56	0	55.34	SVSTLKEAELK			missed K-E@6	0.00210715	1203.67	402.232	1203.67	402.231	3	9	1.1.1.1918.2	13.9089	6782.23	2203.8	13.72	0.29	478.704
tr|A0A498IWZ8|A0A498IWZ8_MALDO	Phosphoglycerate kinase OS=Malus domestica OX=3750 GN=DVH24_021907 PE=3 SV=1	74.56	0	99	VVPASAIPDGWMGLDIGPDSIK	Oxidation(M)@12			-0.000430671	2253.13	752.052	2253.14	752.052	3	12	1.1.1.2544.16	27.7202	11286.9	10018.6	27.66	0.28	597.849
tr|A0A498IWZ8|A0A498IWZ8_MALDO	Phosphoglycerate kinase OS=Malus domestica OX=3750 GN=DVH24_021907 PE=3 SV=1	74.56	0	94.59	VVPASAIPDGWMGLDIGPDSIK	Oxidation(M)@12			-0.00280827	2253.13	564.29	2253.14	564.291	4	7	1.1.1.2540.4	27.6179	1496.14	1191.44	27.66	0.24	223.107
tr|A0A498IWZ8|A0A498IWZ8_MALDO	Phosphoglycerate kinase OS=Malus domestica OX=3750 GN=DVH24_021907 PE=3 SV=1	74.56	0	91.5	VVPASAIPDGWMGLDIGPDSIK	Dioxidation(W)@11			0.00436117	2269.13	757.385	2269.13	757.384	3	8	1.1.1.2489.15	26.4346	979.02	960.65	26.42	0.19	153.54
tr|A0A498IWZ8|A0A498IWZ8_MALDO	Phosphoglycerate kinase OS=Malus domestica OX=3750 GN=DVH24_021907 PE=3 SV=1	74.56	0	91.5	VVPASAIPDGWMGLDIGPDSIK	Oxidation(M)@12			-0.000430671	2253.13	752.052	2253.14	752.052	3	6	1.1.1.2522.17	27.202	11286.9	395.55	27.66	0.28	216.33
tr|A0A498IWZ8|A0A498IWZ8_MALDO	Phosphoglycerate kinase OS=Malus domestica OX=3750 GN=DVH24_021907 PE=3 SV=1	74.56	0	61.38	VVPASAIPDGWMGLDIGPDSIK	Oxidation(W)@11; Oxidation(M)@12			0.00436117	2269.13	757.385	2269.13	757.384	3	8	1.1.1.2489.15	26.4346	979.02	960.65	26.42	0.19	153.54
tr|A0A498IWZ8|A0A498IWZ8_MALDO	Phosphoglycerate kinase OS=Malus domestica OX=3750 GN=DVH24_021907 PE=3 SV=1	74.56	0	50.04	VVPASAIPDGWMGLDIGPDSIK	Dioxidation(M)@12	Dioxidation(M)@296		0.00436117	2269.13	757.385	2269.13	757.384	3	8	1.1.1.2489.15	26.4346	979.02	960.65	26.42	0.19	153.54
tr|A0A498IWZ8|A0A498IWZ8_MALDO	Phosphoglycerate kinase OS=Malus domestica OX=3750 GN=DVH24_021907 PE=3 SV=1	74.56	0	39.06	VVPASAIPDGWMGLDIGPDSIK				0.00508248	2237.15	560.294	2237.14	560.292	4	6	1.1.1.2619.7	29.5255	841.95	597.75	29.57	0.25	255.162
tr|A0A498IWZ8|A0A498IWZ8_MALDO	Phosphoglycerate kinase OS=Malus domestica OX=3750 GN=DVH24_021907 PE=3 SV=1	74.56	0	99	YLKPSVAGFLMQK	Oxidation(M)@11			0.00218585	1496.81	499.943	1496.81	499.943	3	15	1.1.1.2290.4	21.7766	8852.45	8490.76	21.79	0.4	775.476
tr|A0A498IWZ8|A0A498IWZ8_MALDO	Phosphoglycerate kinase OS=Malus domestica OX=3750 GN=DVH24_021907 PE=3 SV=1	74.56	0	99	YLKPSVAGFLMQK	Oxidation(M)@11			0.00218585	1496.81	499.943	1496.81	499.943	3	13	1.1.1.2292.11	21.8255	8852.45	8273.09	21.79	0.4	748.457
tr|A0A498IWZ8|A0A498IWZ8_MALDO	Phosphoglycerate kinase OS=Malus domestica OX=3750 GN=DVH24_021907 PE=3 SV=1	74.56	0	99	YLKPSVAGFLMQK	Oxidation(M)@11			0.00218585	1496.81	499.943	1496.81	499.943	3	13	1.1.1.2294.4	21.8651	8852.45	7602.09	21.79	0.4	778.213
tr|A0A498IWZ8|A0A498IWZ8_MALDO	Phosphoglycerate kinase OS=Malus domestica OX=3750 GN=DVH24_021907 PE=3 SV=1	74.56	0	25.56	YLKPSVAGFLMQK	Carbamyl@N-term			0.000121885	1523.82	762.916	1523.82	762.916	2	6	1.1.1.2501.15	26.7134	1798.11	1255.44	26.79	0.54	108.312
tr|A0A498IWZ8|A0A498IWZ8_MALDO	Phosphoglycerate kinase OS=Malus domestica OX=3750 GN=DVH24_021907 PE=3 SV=1	74.56	0	20.05	YLKPSVAGFLMQK	Deamidated(Q)@12			0.0154373	1481.81	494.944	1481.8	494.939	3	6	1.1.1.2365.4	23.5353	1908.5	1416.97	23.41	0.51	395.79
tr|A0A498IWZ8|A0A498IWZ8_MALDO	Phosphoglycerate kinase OS=Malus domestica OX=3750 GN=DVH24_021907 PE=3 SV=1	74.56	0	93.45	YLLGHGAK				0.000975393	857.477	429.746	857.476	429.745	2	6	1.1.1.1752.2	10.8815	822.55	325.34	10.74	0.23	65.5315
tr|A0A498IWZ8|A0A498IWZ8_MALDO	Phosphoglycerate kinase OS=Malus domestica OX=3750 GN=DVH24_021907 PE=3 SV=1	74.56	0	99	YSLKPLVPR	Carbamyl(K)@4			0.00128306	1114.65	558.333	1114.65	558.332	2	9	1.1.1.2291.7	21.8063	5181.09	2510.55	21.6	0.33	322.341
tr|A0A498IWZ8|A0A498IWZ8_MALDO	Phosphoglycerate kinase OS=Malus domestica OX=3750 GN=DVH24_021907 PE=3 SV=1	74.56	0	37.42	YSLKPLVPR				-0.00140164	1071.64	536.829	1071.64	536.829	2	5	1.1.1.2080.6	17.5649	8043.23	1066.09	17.78	0.37	104.614

## Sheet: Spot 8
Accession #	Name
tr|A0A498IWZ8|A0A498IWZ8_MALDO	Phosphoglycerate kinase OS=Malus domestica OX=3750 GN=DVH24_021907 PE=3 SV=1
Accessions	Names	%Cov(95)	Contrib	Conf	Sequence	Modifications	ProteinModifications	Cleavages	dMass	Obs MW	Obs m/z	Theor MW	Theor m/z	Theor z	Sc	Spectrum	Acq Time	Intensity (Peptide)	PrecursorIntensityAcquisition	Apex Time (Peptide)	Elution Peak Width (Peptide)	MS2Counts
tr|A0A498IWZ8|A0A498IWZ8_MALDO	Phosphoglycerate kinase OS=Malus domestica OX=3750 GN=DVH24_021907 PE=3 SV=1	78.55	2	99	ELDYLVGAVSNPK	Glu->pyro-Glu@N-term			0.00123343	1385.72	693.867	1385.72	693.867	2	16	1.1.1.2497.7	27.8157	7659.07	1611.55	27.58	0.3	214.242
tr|A0A498IWZ8|A0A498IWZ8_MALDO	Phosphoglycerate kinase OS=Malus domestica OX=3750 GN=DVH24_021907 PE=3 SV=1	78.55	2	99	FAAGTEAIAK				-3.40702e-05	977.518	489.766	977.518	489.766	2	17	1.1.1.1906.4	13.8069	236742	55883.6	13.61	0.23	4383.16
tr|A0A498IWZ8|A0A498IWZ8_MALDO	Phosphoglycerate kinase OS=Malus domestica OX=3750 GN=DVH24_021907 PE=3 SV=1	78.55	2	99	FAAGTEAIAKK			missed K-K@10	-0.00238198	1105.61	553.813	1105.61	553.814	2	9	1.1.1.1806.4	11.7147	6013.79	910.18	11.89	0.19	62.6892
tr|A0A498IWZ8|A0A498IWZ8_MALDO	Phosphoglycerate kinase OS=Malus domestica OX=3750 GN=DVH24_021907 PE=3 SV=1	78.55	2	99	GVSILLPTDVVIADK				0.000886584	1538.89	770.454	1538.89	770.453	2	21	1.1.1.2458.7	26.8562	40609.9	12348.5	26.67	0.24	1110.92
tr|A0A498IWZ8|A0A498IWZ8_MALDO	Phosphoglycerate kinase OS=Malus domestica OX=3750 GN=DVH24_021907 PE=3 SV=1	78.55	2	99	GVSILLPTDVVIADKFAADANSK			missed K-F@15	-0.00319747	2343.27	782.096	2343.27	782.097	3	12	1.1.1.2504.3	27.9882	10966	2451.09	28.22	0.32	138.253
tr|A0A498IWZ8|A0A498IWZ8_MALDO	Phosphoglycerate kinase OS=Malus domestica OX=3750 GN=DVH24_021907 PE=3 SV=1	78.55	2	99	IANDCIGEEVEK	Carbamidomethyl(C)@5			-0.000393718	1375.63	688.822	1375.63	688.822	2	19	1.1.1.1946.7	14.7626	82300.5	11187.3	14.56	0.19	759.571
tr|A0A498IWZ8|A0A498IWZ8_MALDO	Phosphoglycerate kinase OS=Malus domestica OX=3750 GN=DVH24_021907 PE=3 SV=1	78.55	2	99	IGVIESLLAK				-0.00160533	1041.64	521.828	1041.64	521.829	2	17	1.1.1.2411.3	25.7282	181763	136369	25.62	0.35	9398.21
tr|A0A498IWZ8|A0A498IWZ8_MALDO	Phosphoglycerate kinase OS=Malus domestica OX=3750 GN=DVH24_021907 PE=3 SV=1	78.55	2	99	LASLADVYVNDAFGTAHR	Deamidated(N)@10			0.00398834	1919.94	640.988	1919.94	640.987	3	25	1.1.1.2392.9	25.2758	6634.09	6395.42	25.24	0.24	2313.51
tr|A0A498IWZ8|A0A498IWZ8_MALDO	Phosphoglycerate kinase OS=Malus domestica OX=3750 GN=DVH24_021907 PE=3 SV=1	78.55	2	99	LSELLGLEVK				-0.00174972	1099.65	550.831	1099.65	550.832	2	17	1.1.1.2324.3	23.6516	445295	260673	23.5	0.28	22311
tr|A0A498IWZ8|A0A498IWZ8_MALDO	Phosphoglycerate kinase OS=Malus domestica OX=3750 GN=DVH24_021907 PE=3 SV=1	78.55	2	99	LVAQLPEGGVLLLENVR				0.00246227	1819.06	455.772	1819.06	455.771	4	14	1.1.1.2548.3	29.062	1195.16	608.66	28.91	0.29	470.44
tr|A0A498IWZ8|A0A498IWZ8_MALDO	Phosphoglycerate kinase OS=Malus domestica OX=3750 GN=DVH24_021907 PE=3 SV=1	78.55	2	99	MSHISTGGGASLELLEGK				0.00320622	1785.9	596.306	1785.89	596.305	3	23	1.1.1.2225.2	21.2789	28312.2	5177	20.96	0.29	531.716
tr|A0A498IWZ8|A0A498IWZ8_MALDO	Phosphoglycerate kinase OS=Malus domestica OX=3750 GN=DVH24_021907 PE=3 SV=1	78.55	2	99	RPFAAIVGGSK				-0.00151459	1101.63	551.821	1101.63	551.822	2	16	1.1.1.1993.5	15.8699	15747.9	14626.2	15.72	0.44	997.993
tr|A0A498IWZ8|A0A498IWZ8_MALDO	Phosphoglycerate kinase OS=Malus domestica OX=3750 GN=DVH24_021907 PE=3 SV=1	78.55	2	99	SKGVSILLPTDVVIADK			missed K-G@2	-0.0013984	1754.02	585.68	1754.02	585.68	3	14	1.1.1.2361.6	24.541	5831.06	5285.08	24.48	0.29	545.904
tr|A0A498IWZ8|A0A498IWZ8_MALDO	Phosphoglycerate kinase OS=Malus domestica OX=3750 GN=DVH24_021907 PE=3 SV=1	78.55	2	99	TLPGVLALDDA				-0.000439889	1083.58	542.798	1083.58	542.798	2	17	1.1.1.2412.3	25.7498	98323.2	94064	25.72	0.28	8936.63
tr|A0A498IWZ8|A0A498IWZ8_MALDO	Phosphoglycerate kinase OS=Malus domestica OX=3750 GN=DVH24_021907 PE=3 SV=1	78.55	2	99	VDLNVPLDDNSNITDDTR				0.00469002	2014.95	672.657	2014.94	672.655	3	18	1.1.1.2238.7	21.5897	98706.4	2578.01	21.2	0.23	1824.96
tr|A0A498IWZ8|A0A498IWZ8_MALDO	Phosphoglycerate kinase OS=Malus domestica OX=3750 GN=DVH24_021907 PE=3 SV=1	78.55	2	99	VFVRVDLNVPLDDNSNITDDTR			missed R-V@4	0.000941774	2516.25	839.758	2516.25	839.758	3	7	1.1.1.2351.13	24.3036	604.86	490.39	24.24	0.31	149.942
tr|A0A498IWZ8|A0A498IWZ8_MALDO	Phosphoglycerate kinase OS=Malus domestica OX=3750 GN=DVH24_021907 PE=3 SV=1	78.55	2	99	VVPASAIPDGWMGLDIGPDSIK				-0.000636052	2237.14	746.721	2237.14	746.721	3	26	1.1.1.2556.3	29.2659	24947	22804.8	29.33	0.35	5587.2
tr|A0A498IWZ8|A0A498IWZ8_MALDO	Phosphoglycerate kinase OS=Malus domestica OX=3750 GN=DVH24_021907 PE=3 SV=1	78.55	2	99	YLKPSVAGFLMQK				0.00172635	1480.81	494.612	1480.81	494.611	3	14	1.1.1.2307.9	23.2478	19751.5	14074.4	23.09	0.39	1618.36
tr|A0A498IWZ8|A0A498IWZ8_MALDO	Phosphoglycerate kinase OS=Malus domestica OX=3750 GN=DVH24_021907 PE=3 SV=1	78.55	2	99	YSLKPLVPR				-0.000670222	1071.64	536.829	1071.64	536.829	2	12	1.1.1.2079.10	17.8722	58768.2	43258.4	17.79	0.24	2588.95
tr|A0A498IWZ8|A0A498IWZ8_MALDO	Phosphoglycerate kinase OS=Malus domestica OX=3750 GN=DVH24_021907 PE=3 SV=1	78.55	1.76955	99	VNVLLLGGGMIF			cleaved F-T@C-term	-0.000222958	1231.7	616.857	1231.7	616.857	2	17	1.1.1.2607.3	30.4321	2325.9	2232.1	30.42	0.05	555.355
tr|A0A498IWZ8|A0A498IWZ8_MALDO	Phosphoglycerate kinase OS=Malus domestica OX=3750 GN=DVH24_021907 PE=3 SV=1	78.55	1.60206	97.95	AQGHSVGSSLVEEDKLDLAK			missed K-L@15	0.000522295	2082.06	695.027	2082.06	695.027	3	10	1.1.1.2098.10	18.3079	12428.4	965.01	17.93	0.26	179.628
tr|A0A498IWZ8|A0A498IWZ8_MALDO	Phosphoglycerate kinase OS=Malus domestica OX=3750 GN=DVH24_021907 PE=3 SV=1	78.55	1.5376	99	GVSILLPTDVVIADKF			cleaved F-A@C-term; missed K-F@15	-0.00110211	1685.96	843.987	1685.96	843.987	2	11	1.1.1.2582.6	29.8974	1671.33	751.49	30	0.12	109.579
tr|A0A498IWZ8|A0A498IWZ8_MALDO	Phosphoglycerate kinase OS=Malus domestica OX=3750 GN=DVH24_021907 PE=3 SV=1	78.55	1.52288	99	PFAAIVGGSK			cleaved R-P@N-term	0.000397408	945.529	473.772	945.528	473.771	2	16	1.1.1.2039.8	16.9319	22479.9	9242.23	17.1	0.28	1045.62
tr|A0A498IWZ8|A0A498IWZ8_MALDO	Phosphoglycerate kinase OS=Malus domestica OX=3750 GN=DVH24_021907 PE=3 SV=1	78.55	1.4437	97.12	YLLGHGAK				9.64951e-05	857.476	429.745	857.476	429.745	2	7	1.1.1.1774.2	11.1055	2908.88	376.69	11.29	0.28	66.7746
tr|A0A498IWZ8|A0A498IWZ8_MALDO	Phosphoglycerate kinase OS=Malus domestica OX=3750 GN=DVH24_021907 PE=3 SV=1	78.55	1.33724	96.31	AQGHSVGSSLVEEDK				-0.000158651	1541.73	514.918	1541.73	514.918	3	7	1.1.1.1844.3	12.4609	568.8	437.09	12.52	0.25	35.7898
tr|A0A498IWZ8|A0A498IWZ8_MALDO	Phosphoglycerate kinase OS=Malus domestica OX=3750 GN=DVH24_021907 PE=3 SV=1	78.55	1.33724	99	VSTKIGVIESLLAK	Carbamyl@N-term		missed K-I@4	-0.000761945	1499.89	500.971	1499.89	500.971	3	12	1.1.1.2592.3	30.1325	5382.1	3906.13	30.15	0.05	454.267
tr|A0A498IWZ8|A0A498IWZ8_MALDO	Phosphoglycerate kinase OS=Malus domestica OX=3750 GN=DVH24_021907 PE=3 SV=1	78.55	1.25181	98.92	FYKEEEKNDPEFAK	Deamidated(N)@8		missed K-E@3; missed K-N@7	0.0174392	1773.83	444.464	1773.81	444.46	4	14	1.1.1.1871.2	12.9874	2595.91	2070.3	13.12	0.28	1409.65
tr|A0A498IWZ8|A0A498IWZ8_MALDO	Phosphoglycerate kinase OS=Malus domestica OX=3750 GN=DVH24_021907 PE=3 SV=1	78.55	0.906578	99	GVTTIIGGGDSVAAVEK	Delta:H(4)C(2)(K)@17			0.00403932	1600.87	801.443	1600.87	801.441	2	19	1.1.1.2300.10	23.082	34401.2	4606.98	22.85	0.22	457.446
tr|A0A498IWZ8|A0A498IWZ8_MALDO	Phosphoglycerate kinase OS=Malus domestica OX=3750 GN=DVH24_021907 PE=3 SV=1	78.55	0.847712	99	GVSILLPTDVVIA			cleaved A-D@C-term	0.000394992	1295.77	648.893	1295.77	648.892	2	10	1.1.1.2588.2	30.0354	598.16	519.6	30.05	0.1	110.816
tr|A0A498IWZ8|A0A498IWZ8_MALDO	Phosphoglycerate kinase OS=Malus domestica OX=3750 GN=DVH24_021907 PE=3 SV=1	78.55	0.744727	99	TLPGVLALDD			cleaved D-A@C-term	-0.00010619	1012.54	507.279	1012.54	507.279	2	8	1.1.1.2376.5	24.8852	618.49	583.58	24.88	0.37	210.513
tr|A0A498IWZ8|A0A498IWZ8_MALDO	Phosphoglycerate kinase OS=Malus domestica OX=3750 GN=DVH24_021907 PE=3 SV=1	78.55	0.440093	99	ISTGGGASLELLEGK			cleaved H-I@N-term	0.000428383	1430.76	716.388	1430.76	716.388	2	14	1.1.1.2248.4	21.8349	1197.26	1131.99	21.89	0.26	218.865
tr|A0A498IWZ8|A0A498IWZ8_MALDO	Phosphoglycerate kinase OS=Malus domestica OX=3750 GN=DVH24_021907 PE=3 SV=1	78.55	0.366532	99	YLKPSVAGF			cleaved F-L@C-term	0.00026092	980.533	491.274	980.533	491.274	2	11	1.1.1.2180.5	20.1999	6157.94	5303.58	20.1	0.35	482.784
tr|A0A498IWZ8|A0A498IWZ8_MALDO	Phosphoglycerate kinase OS=Malus domestica OX=3750 GN=DVH24_021907 PE=3 SV=1	78.55	0.359519	99	ELDYLVGAVSN			cleaved N-P@C-term	0.00377035	1178.59	590.3	1178.58	590.298	2	10	1.1.1.2327.4	23.729	640.49	622.1	23.76	0.42	163.291
tr|A0A498IWZ8|A0A498IWZ8_MALDO	Phosphoglycerate kinase OS=Malus domestica OX=3750 GN=DVH24_021907 PE=3 SV=1	78.55	0.295849	55.27	KLASLADVYVNDAFGTAHR			missed K-L@1	0.0034879	2047.05	512.77	2047.05	512.769	4	5	1.1.1.2342.2	24.0724	363.36	171.51	23.95	0.36	164.735
tr|A0A498IWZ8|A0A498IWZ8_MALDO	Phosphoglycerate kinase OS=Malus domestica OX=3750 GN=DVH24_021907 PE=3 SV=1	78.55	0.294992	99	LAELSGKGVTTIIGGGDSVAAVEK	Carbamidomethyl(K)@7		missed K-G@7	-0.00519558	2328.25	777.09	2328.25	777.092	3	18	1.1.1.2245.3	21.7592	159.958	159.958			176.035
tr|A0A498IWZ8|A0A498IWZ8_MALDO	Phosphoglycerate kinase OS=Malus domestica OX=3750 GN=DVH24_021907 PE=3 SV=1	78.55	0.235824	90.08	EEEKNDPEFAK	Glu->pyro-Glu@N-term		missed K-N@4	-0.002297	1316.59	659.3	1316.59	659.302	2	7	1.1.1.1837.4	12.2946	1067.65	529.88	12.42	0.28	55.1927
tr|A0A498IWZ8|A0A498IWZ8_MALDO	Phosphoglycerate kinase OS=Malus domestica OX=3750 GN=DVH24_021907 PE=3 SV=1	78.55	0.0872467	99	SVSTLKEAELK	Carbamyl(K)@6		missed K-E@6	-0.00219341	1246.67	624.345	1246.68	624.346	2	16	1.1.1.2059.18	17.3974	13810.1	13607.4	17.38	0.24	1426.51
tr|A0A498IWZ8|A0A498IWZ8_MALDO	Phosphoglycerate kinase OS=Malus domestica OX=3750 GN=DVH24_021907 PE=3 SV=1	78.55	0.076238	17.71	IRAAVPTIK			missed R-A@2	-0.000507745	967.617	484.816	967.618	484.816	2	5	1.1.1.1924.2	14.2289	396.29	100.28	14.39	0.4	56.9419
tr|A0A498IWZ8|A0A498IWZ8_MALDO	Phosphoglycerate kinase OS=Malus domestica OX=3750 GN=DVH24_021907 PE=3 SV=1	78.55	0.0245682	94.17	KLAELSGKGVTTIIGGGDSVAAVEK	Carbamyl@N-term		missed K-L@1; missed K-G@8	0.00184684	2442.33	815.119	2442.33	815.118	3	7	1.1.1.2285.15	22.7214	1611.25	782.82	22.85	0.24	113.659
tr|A0A498IWZ8|A0A498IWZ8_MALDO	Phosphoglycerate kinase OS=Malus domestica OX=3750 GN=DVH24_021907 PE=3 SV=1	78.55	0.0231917	88.33	AAGTEAIAKK			cleaved F-A@N-term; missed K-K@9	-9.123e-05	958.545	480.28	958.545	480.28	2	7	1.1.1.1810.2	11.7923	756.73	467.45	11.89	0.24	82.6641
tr|A0A498IWZ8|A0A498IWZ8_MALDO	Phosphoglycerate kinase OS=Malus domestica OX=3750 GN=DVH24_021907 PE=3 SV=1	78.55	0.0172766	31.72	EEEKNDPEFAKK	Glu->pyro-Glu@N-term		missed K-N@4; missed K-K@11	0.000330288	1444.68	482.568	1444.68	482.568	3	5	1.1.1.1715.2	10.5071	741.41	412.36	10.62	0.28	31.8912
tr|A0A498IWZ8|A0A498IWZ8_MALDO	Phosphoglycerate kinase OS=Malus domestica OX=3750 GN=DVH24_021907 PE=3 SV=1	78.55	0.0043648	75.18	KSVSTLKEAELK	Carbamyl@N-term		missed K-S@1; missed K-E@7	-0.00112552	1374.77	459.264	1374.77	459.265	3	11	1.1.1.1941.7	14.6446	4183.6	4129.3	14.65	0.19	726.198
tr|A0A498IWZ8|A0A498IWZ8_MALDO	Phosphoglycerate kinase OS=Malus domestica OX=3750 GN=DVH24_021907 PE=3 SV=1	78.55	0.00217692	80.72	GVTPKYSLKPLVPR	Carbamyl(K)@5		missed K-Y@5	0.00111548	1596.94	533.319	1596.94	533.319	3	10	1.1.1.2204.9	20.7802	11510.7	3125.36	20.6	0.22	1624.26
tr|A0A498IWZ8|A0A498IWZ8_MALDO	Phosphoglycerate kinase OS=Malus domestica OX=3750 GN=DVH24_021907 PE=3 SV=1	78.55	0.00217692	97.75	TTIIGGGDSVAAVEK			cleaved V-T@N-term	-0.00159452	1416.74	709.38	1416.75	709.38	2	9	1.1.1.2140.13	19.3045	1865.02	978.43	19.36	0.22	148.643
tr|A0A498IWZ8|A0A498IWZ8_MALDO	Phosphoglycerate kinase OS=Malus domestica OX=3750 GN=DVH24_021907 PE=3 SV=1	78.55	0.00130485	98.58	YLVGAVSNPK			cleaved D-Y@N-term	-0.00178066	1046.57	524.294	1046.58	524.295	2	10	1.1.1.1965.4	15.211	780.7	516.94	15.08	0.31	153.621
tr|A0A498IWZ8|A0A498IWZ8_MALDO	Phosphoglycerate kinase OS=Malus domestica OX=3750 GN=DVH24_021907 PE=3 SV=1	78.55	0.000434506	86.31	GGVLLLENVR			cleaved E-G@N-term	-0.000504646	1068.63	535.322	1068.63	535.322	2	7	1.1.1.2281.8	22.6124	628.6	522.82	22.65	0.46	323.324
tr|A0A498IWZ8|A0A498IWZ8_MALDO	Phosphoglycerate kinase OS=Malus domestica OX=3750 GN=DVH24_021907 PE=3 SV=1	78.55	0.000434506	39.81	IGGGDSVAAVEK			cleaved I-I@N-term	0.0020339	1101.57	551.792	1101.57	551.791	2	5	1.1.1.2141.5	19.3226	1761.73	1239.76	19.41	0.27	73.3284
tr|A0A498IWZ8|A0A498IWZ8_MALDO	Phosphoglycerate kinase OS=Malus domestica OX=3750 GN=DVH24_021907 PE=3 SV=1	78.55	0.000434506	65.41	RPFAAIVGG			cleaved G-S@C-term	0.000154046	886.503	444.259	886.503	444.259	2	7	1.1.1.2114.2	18.6798	2869.61	1470.62	18.84	0.33	371.337
tr|A0A498IWZ8|A0A498IWZ8_MALDO	Phosphoglycerate kinase OS=Malus domestica OX=3750 GN=DVH24_021907 PE=3 SV=1	78.55	0.000434506	73.97	VILASHLG			cleaved G-R@C-term	-0.000130704	808.481	405.248	808.481	405.248	2	7	1.1.1.2022.2	16.5293	2017.27	1353.88	16.69	0.25	411.418
tr|A0A498IWZ8|A0A498IWZ8_MALDO	Phosphoglycerate kinase OS=Malus domestica OX=3750 GN=DVH24_021907 PE=3 SV=1	78.55	0	39.81	AQGHSVGSSLVEED			cleaved D-K@C-term	-0.00192423	1413.64	707.825	1413.64	707.826	2	6	1.1.1.1916.5	14.0496	452.96	343.15	14.1	0.31	32.7097
tr|A0A498IWZ8|A0A498IWZ8_MALDO	Phosphoglycerate kinase OS=Malus domestica OX=3750 GN=DVH24_021907 PE=3 SV=1	78.55	0	17.39	AQGHSVGSSLVEEDK	Delta:H(4)C(2)(K)@15			-0.00112848	1569.76	524.261	1569.76	524.262	3	7	1.1.1.1943.6	14.6883	1084.28	503.16	14.84	0.29	87.8399
tr|A0A498IWZ8|A0A498IWZ8_MALDO	Phosphoglycerate kinase OS=Malus domestica OX=3750 GN=DVH24_021907 PE=3 SV=1	78.55	0	17.28	AQGHSVGSSLVEEDK	Lys-loss@C-term			-0.00192423	1413.64	707.825	1413.64	707.826	2	6	1.1.1.1916.5	14.0496	452.96	343.15	14.1	0.31	32.7097
tr|A0A498IWZ8|A0A498IWZ8_MALDO	Phosphoglycerate kinase OS=Malus domestica OX=3750 GN=DVH24_021907 PE=3 SV=1	78.55	0	17.25	AQGHSVGSSLVEEDK	Dimethyl(K)@15	Dimethyl(K)@247		-0.00112848	1569.76	524.261	1569.76	524.262	3	7	1.1.1.1943.6	14.6883	1084.28	503.16	14.84	0.29	87.8399
tr|A0A498IWZ8|A0A498IWZ8_MALDO	Phosphoglycerate kinase OS=Malus domestica OX=3750 GN=DVH24_021907 PE=3 SV=1	78.55	0	17.32	AQGHSVGSSLVEEDKLDLAK			missed K-L@15	-0.000209502	2082.06	521.522	2082.06	521.522	4	5	1.1.1.2057.8	17.3421	29075.8	342.14	17.96	0.26	114.528
tr|A0A498IWZ8|A0A498IWZ8_MALDO	Phosphoglycerate kinase OS=Malus domestica OX=3750 GN=DVH24_021907 PE=3 SV=1	78.55	0	17.26	EEEKNDPEFAK	Delta:H(4)C(2)@N-term		missed K-N@4	0.00143288	1362.63	455.218	1362.63	455.217	3	6	1.1.1.1819.2	11.9269	524.23	249.11	12.05	0.23	75.9765
tr|A0A498IWZ8|A0A498IWZ8_MALDO	Phosphoglycerate kinase OS=Malus domestica OX=3750 GN=DVH24_021907 PE=3 SV=1	78.55	0	99	ELDYLVGAVSNPK	Glu->pyro-Glu@N-term			0.00123343	1385.72	693.867	1385.72	693.867	2	15	1.1.1.2476.8	27.3	7659.07	556.63	27.58	0.3	105.694
tr|A0A498IWZ8|A0A498IWZ8_MALDO	Phosphoglycerate kinase OS=Malus domestica OX=3750 GN=DVH24_021907 PE=3 SV=1	78.55	0	99	ELDYLVGAVSNPK				0.00212677	1403.73	702.873	1403.73	702.872	2	8	1.1.1.2293.16	22.9128	898.32	740.86	22.85	0.32	120.825
tr|A0A498IWZ8|A0A498IWZ8_MALDO	Phosphoglycerate kinase OS=Malus domestica OX=3750 GN=DVH24_021907 PE=3 SV=1	78.55	0	99	ELDYLVGAVSNPK				0.00212268	1403.73	702.873	1403.73	702.872	2	22	1.1.1.2251.4	21.8982	488060	163625	21.72	0.23	11850.6
tr|A0A498IWZ8|A0A498IWZ8_MALDO	Phosphoglycerate kinase OS=Malus domestica OX=3750 GN=DVH24_021907 PE=3 SV=1	78.55	0	99	ELDYLVGAVSNPK	Deamidated(N)@11; Delta:H(4)C(2)(K)@13			0.00858777	1432.75	717.384	1432.74	717.38	2	8	1.1.1.2332.14	23.8425	731.19	494.88	23.95	0.43	132.45
tr|A0A498IWZ8|A0A498IWZ8_MALDO	Phosphoglycerate kinase OS=Malus domestica OX=3750 GN=DVH24_021907 PE=3 SV=1	78.55	0	98.5	ELDYLVGAVSNPK				0.00212268	1403.73	702.873	1403.73	702.872	2	9	1.1.1.2229.12	21.3775	488060	1191.01	21.72	0.23	297.142
tr|A0A498IWZ8|A0A498IWZ8_MALDO	Phosphoglycerate kinase OS=Malus domestica OX=3750 GN=DVH24_021907 PE=3 SV=1	78.55	0	97.57	ELDYLVGAVSNPK				0.00456411	1403.73	702.874	1403.73	702.872	2	8	1.1.1.2206.15	20.8336	3931.34	1744.04	20.99	0.26	238.369
tr|A0A498IWZ8|A0A498IWZ8_MALDO	Phosphoglycerate kinase OS=Malus domestica OX=3750 GN=DVH24_021907 PE=3 SV=1	78.55	0	94.17	ELDYLVGAVSNPK	Deamidated(N)@11; Dimethyl(K)@13	Dimethyl(K)@191		0.00858777	1432.75	717.384	1432.74	717.38	2	8	1.1.1.2332.14	23.8425	731.19	494.88	23.95	0.43	132.45
tr|A0A498IWZ8|A0A498IWZ8_MALDO	Phosphoglycerate kinase OS=Malus domestica OX=3750 GN=DVH24_021907 PE=3 SV=1	78.55	0	68.15	ELDYLVGAVSNPK	Amino(Y)@4			-0.0208821	1418.72	710.367	1418.74	710.378	2	8	1.1.1.2252.5	21.928	695.2	671.39	21.98	0.31	113.871
tr|A0A498IWZ8|A0A498IWZ8_MALDO	Phosphoglycerate kinase OS=Malus domestica OX=3750 GN=DVH24_021907 PE=3 SV=1	78.55	0	49.38	ELDYLVGAVSNPK				0.0137235	1403.74	702.879	1403.73	702.872	2	5	1.1.1.2352.8	24.3229	618.34	71.44	24.04	0.39	103.714
tr|A0A498IWZ8|A0A498IWZ8_MALDO	Phosphoglycerate kinase OS=Malus domestica OX=3750 GN=DVH24_021907 PE=3 SV=1	78.55	0	39.36	ELDYLVGAVSNPK	Deamidated(N)@11; Amidated@C-term			0.00212677	1403.73	702.873	1403.73	702.872	2	9	1.1.1.2293.16	22.9128	898.32	740.86	22.85	0.32	120.825
tr|A0A498IWZ8|A0A498IWZ8_MALDO	Phosphoglycerate kinase OS=Malus domestica OX=3750 GN=DVH24_021907 PE=3 SV=1	78.55	0	99	FAAGTEAIAK				-3.40702e-05	977.518	489.766	977.518	489.766	2	11	1.1.1.1950.2	14.8589	704.36	688.27	14.89	0.55	89.064
tr|A0A498IWZ8|A0A498IWZ8_MALDO	Phosphoglycerate kinase OS=Malus domestica OX=3750 GN=DVH24_021907 PE=3 SV=1	78.55	0	60.47	FAAGTEAIAK				-3.40702e-05	977.518	489.766	977.518	489.766	2	7	1.1.1.1928.5	14.3297	236742	1105.25	13.61	0.23	152.172
tr|A0A498IWZ8|A0A498IWZ8_MALDO	Phosphoglycerate kinase OS=Malus domestica OX=3750 GN=DVH24_021907 PE=3 SV=1	78.55	0	44.61	FAAGTEAIAK				-3.40702e-05	977.518	489.766	977.518	489.766	2	6	1.1.1.1884.5	13.2992	236742	514.21	13.61	0.23	56.016
tr|A0A498IWZ8|A0A498IWZ8_MALDO	Phosphoglycerate kinase OS=Malus domestica OX=3750 GN=DVH24_021907 PE=3 SV=1	78.55	0	31.11	FAAGTEAIAK	Delta:H(4)C(2)(K)@10			0.00204622	1005.55	503.783	1005.55	503.782	2	7	1.1.1.2033.4	16.7886	22493.8	1948.43	16.99	0.21	199.2
tr|A0A498IWZ8|A0A498IWZ8_MALDO	Phosphoglycerate kinase OS=Malus domestica OX=3750 GN=DVH24_021907 PE=3 SV=1	78.55	0	21.5	FAAGTEAIAK	Dimethyl(K)@10	Dimethyl(K)@341		0.00204622	1005.55	503.783	1005.55	503.782	2	7	1.1.1.2033.4	16.7886	22493.8	1948.43	16.99	0.21	199.2
tr|A0A498IWZ8|A0A498IWZ8_MALDO	Phosphoglycerate kinase OS=Malus domestica OX=3750 GN=DVH24_021907 PE=3 SV=1	78.55	0	17.23	FAAGTEAIAK	Cation:Na(E)@6			-0.00100485	999.499	500.757	999.5	500.757	2	5	1.1.1.1892.4	13.4872	668.18	245.52	13.59	0.21	52.3567
tr|A0A498IWZ8|A0A498IWZ8_MALDO	Phosphoglycerate kinase OS=Malus domestica OX=3750 GN=DVH24_021907 PE=3 SV=1	78.55	0	99	FAAGTEAIAKK	Carbamyl(K)@10		missed K-K@10	-0.000104036	1148.62	575.317	1148.62	575.317	2	11	1.1.1.1929.6	14.357	7088.64	674.48	14.53	0.17	102.783
tr|A0A498IWZ8|A0A498IWZ8_MALDO	Phosphoglycerate kinase OS=Malus domestica OX=3750 GN=DVH24_021907 PE=3 SV=1	78.55	0	17.38	FAAGTEAIAKK	Lys->Allysine(K)@10	Lys->Allysine(K)@341	missed K-K@10	-0.00346902	1104.58	553.296	1104.58	553.298	2	7	1.1.1.1936.6	14.5239	256.12	229.39	14.53	0.47	72.3472
tr|A0A498IWZ8|A0A498IWZ8_MALDO	Phosphoglycerate kinase OS=Malus domestica OX=3750 GN=DVH24_021907 PE=3 SV=1	78.55	0	17.24	FAAGTEAIAKK	Formyl(K)@11		missed K-K@10	0.0304729	1133.64	567.827	1133.61	567.811	2	6	1.1.1.1945.7	14.7363	267.21	160.11	14.63	0.26	68.2618
tr|A0A498IWZ8|A0A498IWZ8_MALDO	Phosphoglycerate kinase OS=Malus domestica OX=3750 GN=DVH24_021907 PE=3 SV=1	78.55	0	17.24	FAAGTEAIAKK	Formyl(K)@10		missed K-K@10	0.0304729	1133.64	567.827	1133.61	567.811	2	6	1.1.1.1945.7	14.7363	267.21	160.11	14.63	0.26	68.2618
tr|A0A498IWZ8|A0A498IWZ8_MALDO	Phosphoglycerate kinase OS=Malus domestica OX=3750 GN=DVH24_021907 PE=3 SV=1	78.55	0	17.21	FAAIVGGSK	Formyl@N-term		cleaved P-F@N-term	0.0220514	876.493	439.254	876.471	439.243	2	7	1.1.1.1996.2	15.934	854.4	733.16	16.06	0.49	416.215
tr|A0A498IWZ8|A0A498IWZ8_MALDO	Phosphoglycerate kinase OS=Malus domestica OX=3750 GN=DVH24_021907 PE=3 SV=1	78.55	0	31.11	FYKEEEKNDPEFAK			missed K-E@3; missed K-N@7	0.00108243	1772.83	444.214	1772.83	444.214	4	8	1.1.1.1867.3	12.9007	6194.74	1118.27	13.01	0.12	243.653
tr|A0A498IWZ8|A0A498IWZ8_MALDO	Phosphoglycerate kinase OS=Malus domestica OX=3750 GN=DVH24_021907 PE=3 SV=1	78.55	0	17.24	FYKEEEKNDPEFAK	Deamidated(N)@8		missed K-E@3; missed K-N@7	0.0174392	1773.83	444.464	1773.81	444.46	4	6	1.1.1.1889.2	13.4151	2595.91	406.74	13.12	0.28	221.607
tr|A0A498IWZ8|A0A498IWZ8_MALDO	Phosphoglycerate kinase OS=Malus domestica OX=3750 GN=DVH24_021907 PE=3 SV=1	78.55	0	99	GVSILLPTDVVIADK				0.000886584	1538.89	770.454	1538.89	770.453	2	7	1.1.1.2437.8	26.3497	40609.9	414.1	26.67	0.24	159.918
tr|A0A498IWZ8|A0A498IWZ8_MALDO	Phosphoglycerate kinase OS=Malus domestica OX=3750 GN=DVH24_021907 PE=3 SV=1	78.55	0	98.54	GVSILLPTDVVIADK	Delta:H(4)C(2)(K)@15			-0.000462488	1566.92	784.469	1566.92	784.469	2	9	1.1.1.2541.4	28.9033	1214.56	568.38	29.08	0.24	139.009
tr|A0A498IWZ8|A0A498IWZ8_MALDO	Phosphoglycerate kinase OS=Malus domestica OX=3750 GN=DVH24_021907 PE=3 SV=1	78.55	0	94.17	GVSILLPTDVVIADK	Dimethyl(K)@15	Dimethyl(K)@276		-0.000462488	1566.92	784.469	1566.92	784.469	2	9	1.1.1.2541.4	28.9033	1214.56	568.38	29.08	0.24	139.009
tr|A0A498IWZ8|A0A498IWZ8_MALDO	Phosphoglycerate kinase OS=Malus domestica OX=3750 GN=DVH24_021907 PE=3 SV=1	78.55	0	35.77	GVSILLPTDVVIADK				0.00125769	1538.89	513.972	1538.89	513.971	3	5	1.1.1.2464.9	26.9977	3470.03	117.21	26.67	0.27	173.431
tr|A0A498IWZ8|A0A498IWZ8_MALDO	Phosphoglycerate kinase OS=Malus domestica OX=3750 GN=DVH24_021907 PE=3 SV=1	78.55	0	94.17	GVSILLPTDVVIADKFAADANSK	Carbamyl(K)@15		missed K-F@15	-0.000760613	2386.27	796.432	2386.27	796.432	3	9	1.1.1.2591.15	30.1174	2308.97	1788.76	30.15	0.08	243.617
tr|A0A498IWZ8|A0A498IWZ8_MALDO	Phosphoglycerate kinase OS=Malus domestica OX=3750 GN=DVH24_021907 PE=3 SV=1	78.55	0	96.48	GVTTIIGGGD			cleaved D-S@C-term	-3.32344e-05	888.455	445.235	888.455	445.235	2	9	1.1.1.2081.3	17.9141	964.51	861.04	17.91	0.31	505.642
tr|A0A498IWZ8|A0A498IWZ8_MALDO	Phosphoglycerate kinase OS=Malus domestica OX=3750 GN=DVH24_021907 PE=3 SV=1	78.55	0	20.74	GVTTIIGGGDSVA			cleaved A-A@C-term	-0.00057989	1145.59	573.803	1145.59	573.804	2	6	1.1.1.2166.10	19.8739	2131.05	1229.55	19.98	0.4	205.83
tr|A0A498IWZ8|A0A498IWZ8_MALDO	Phosphoglycerate kinase OS=Malus domestica OX=3750 GN=DVH24_021907 PE=3 SV=1	78.55	0	99	GVTTIIGGGDSVAAVEK				0.00297597	1572.84	787.427	1572.84	787.425	2	21	1.1.1.2130.3	19.0754	495825	1408.2	19.41	0.24	182.226
tr|A0A498IWZ8|A0A498IWZ8_MALDO	Phosphoglycerate kinase OS=Malus domestica OX=3750 GN=DVH24_021907 PE=3 SV=1	78.55	0	99	GVTTIIGGGDSVAAVEK				0.00297597	1572.84	787.427	1572.84	787.425	2	30	1.1.1.2153.3	19.5765	495825	218484	19.41	0.24	16011.4
tr|A0A498IWZ8|A0A498IWZ8_MALDO	Phosphoglycerate kinase OS=Malus domestica OX=3750 GN=DVH24_021907 PE=3 SV=1	78.55	0	99	GVTTIIGGGDSVAAVEK				0.000778686	1572.84	787.426	1572.84	787.425	2	24	1.1.1.2175.5	20.0895	3992.46	3914.29	20.1	0.33	378.752
tr|A0A498IWZ8|A0A498IWZ8_MALDO	Phosphoglycerate kinase OS=Malus domestica OX=3750 GN=DVH24_021907 PE=3 SV=1	78.55	0	99	GVTTIIGGGDSVAAVEK				0.000778686	1572.84	787.426	1572.84	787.425	2	11	1.1.1.2196.9	20.5951	3992.46	1401.4	20.1	0.33	202.248
tr|A0A498IWZ8|A0A498IWZ8_MALDO	Phosphoglycerate kinase OS=Malus domestica OX=3750 GN=DVH24_021907 PE=3 SV=1	78.55	0	98.7	GVTTIIGGGDSVAAVEK	GG(T)@3; Hex(T)@4	GG(T)@352; Hex(T)@353		0.0247599	1848.96	617.326	1848.93	617.318	3	13	1.1.1.2138.10	19.2587	6396.23	1942.64	19.39	0.24	516.239
tr|A0A498IWZ8|A0A498IWZ8_MALDO	Phosphoglycerate kinase OS=Malus domestica OX=3750 GN=DVH24_021907 PE=3 SV=1	78.55	0	98.7	GVTTIIGGGDSVAAVEK	Hex(T)@3; GG(T)@4	Hex(T)@352; GG(T)@353		0.0247599	1848.96	617.326	1848.93	617.318	3	13	1.1.1.2138.10	19.2587	6396.23	1942.64	19.39	0.24	516.239
tr|A0A498IWZ8|A0A498IWZ8_MALDO	Phosphoglycerate kinase OS=Malus domestica OX=3750 GN=DVH24_021907 PE=3 SV=1	78.55	0	98.58	GVTTIIGGGDSVAAVEK	Hex(T)@3; GG(T)@4	Hex(T)@352; GG(T)@353		0.0247599	1848.96	617.326	1848.93	617.318	3	14	1.1.1.2154.2	19.5886	6396.23	1846.58	19.39	0.24	440.41
tr|A0A498IWZ8|A0A498IWZ8_MALDO	Phosphoglycerate kinase OS=Malus domestica OX=3750 GN=DVH24_021907 PE=3 SV=1	78.55	0	98.58	GVTTIIGGGDSVAAVEK	GG(T)@3; Hex(T)@4	GG(T)@352; Hex(T)@353		0.0247599	1848.96	617.326	1848.93	617.318	3	14	1.1.1.2154.2	19.5886	6396.23	1846.58	19.39	0.24	440.41
tr|A0A498IWZ8|A0A498IWZ8_MALDO	Phosphoglycerate kinase OS=Malus domestica OX=3750 GN=DVH24_021907 PE=3 SV=1	78.55	0	97.71	GVTTIIGGGDSVAAVEK	Hex(T)@3; GG(T)@4	Hex(T)@352; GG(T)@353		0.0247599	1848.96	617.326	1848.93	617.318	3	14	1.1.1.2148.3	19.4604	6396.23	5030.86	19.39	0.24	945.313
tr|A0A498IWZ8|A0A498IWZ8_MALDO	Phosphoglycerate kinase OS=Malus domestica OX=3750 GN=DVH24_021907 PE=3 SV=1	78.55	0	97.71	GVTTIIGGGDSVAAVEK	GG(T)@3; Hex(T)@4	GG(T)@352; Hex(T)@353		0.0247599	1848.96	617.326	1848.93	617.318	3	14	1.1.1.2148.3	19.4604	6396.23	5030.86	19.39	0.24	945.313
tr|A0A498IWZ8|A0A498IWZ8_MALDO	Phosphoglycerate kinase OS=Malus domestica OX=3750 GN=DVH24_021907 PE=3 SV=1	78.55	0	96.98	GVTTIIGGGDSVAAVEK	GG(T)@3; Hex(T)@4	GG(T)@352; Hex(T)@353		0.0247599	1848.96	617.326	1848.93	617.318	3	13	1.1.1.2153.2	19.5682	6396.23	2380.7	19.39	0.24	532.11
tr|A0A498IWZ8|A0A498IWZ8_MALDO	Phosphoglycerate kinase OS=Malus domestica OX=3750 GN=DVH24_021907 PE=3 SV=1	78.55	0	96.98	GVTTIIGGGDSVAAVEK	Hex(T)@3; GG(T)@4	Hex(T)@352; GG(T)@353		0.0247599	1848.96	617.326	1848.93	617.318	3	13	1.1.1.2153.2	19.5682	6396.23	2380.7	19.39	0.24	532.11
tr|A0A498IWZ8|A0A498IWZ8_MALDO	Phosphoglycerate kinase OS=Malus domestica OX=3750 GN=DVH24_021907 PE=3 SV=1	78.55	0	94.54	GVTTIIGGGDSVAAVEK	GG(T)@3; Hex(T)@4	GG(T)@352; Hex(T)@353		0.0247599	1848.96	617.326	1848.93	617.318	3	13	1.1.1.2156.2	19.6388	6396.23	1010.7	19.39	0.24	318.461
tr|A0A498IWZ8|A0A498IWZ8_MALDO	Phosphoglycerate kinase OS=Malus domestica OX=3750 GN=DVH24_021907 PE=3 SV=1	78.55	0	94.54	GVTTIIGGGDSVAAVEK	Hex(T)@3; GG(T)@4	Hex(T)@352; GG(T)@353		0.0247599	1848.96	617.326	1848.93	617.318	3	13	1.1.1.2156.2	19.6388	6396.23	1010.7	19.39	0.24	318.461
tr|A0A498IWZ8|A0A498IWZ8_MALDO	Phosphoglycerate kinase OS=Malus domestica OX=3750 GN=DVH24_021907 PE=3 SV=1	78.55	0	94.17	GVTTIIGGGDSVAAVEK	Dimethyl(K)@17	Dimethyl(K)@366		0.00403932	1600.87	801.443	1600.87	801.441	2	19	1.1.1.2300.10	23.082	34401.2	4606.98	22.85	0.22	457.446
tr|A0A498IWZ8|A0A498IWZ8_MALDO	Phosphoglycerate kinase OS=Malus domestica OX=3750 GN=DVH24_021907 PE=3 SV=1	78.55	0	87.27	GVTTIIGGGDSVAAVEK	Dicarbamidomethyl(D)@10; Hex(S)@11	Hex(S)@360		0.0247599	1848.96	617.326	1848.93	617.318	3	13	1.1.1.2152.5	19.5532	6396.23	2820.95	19.39	0.24	611.684
tr|A0A498IWZ8|A0A498IWZ8_MALDO	Phosphoglycerate kinase OS=Malus domestica OX=3750 GN=DVH24_021907 PE=3 SV=1	78.55	0	17.28	GVTTIIGGGDSVAAVEK	Formyl(K)@17			-0.00334268	1600.83	801.421	1600.83	801.423	2	7	1.1.1.2179.4	20.1823	635.52	503.92	20.22	0.24	88.6332
tr|A0A498IWZ8|A0A498IWZ8_MALDO	Phosphoglycerate kinase OS=Malus domestica OX=3750 GN=DVH24_021907 PE=3 SV=1	78.55	0	17.21	GVTTIIGGGDSVAAVEKA			cleaved A-G@C-term; missed K-A@17	-0.00178754	1643.87	822.943	1643.87	822.944	2	6	1.1.1.2194.9	20.5462	2129.45	629.37	20.67	0.22	148.024
tr|A0A498IWZ8|A0A498IWZ8_MALDO	Phosphoglycerate kinase OS=Malus domestica OX=3750 GN=DVH24_021907 PE=3 SV=1	78.55	0	99	IANDCIGEEVEK	Deamidated(N)@3; Carbamidomethyl(C)@5			-0.00234703	1376.61	689.313	1376.61	689.314	2	18	1.1.1.1967.9	15.2682	3505.04	3303.18	15.35	0.34	303.1
tr|A0A498IWZ8|A0A498IWZ8_MALDO	Phosphoglycerate kinase OS=Malus domestica OX=3750 GN=DVH24_021907 PE=3 SV=1	78.55	0	99	IANDCIGEEVEK	Carbamidomethyl(C)@5; Methyl(E)@8; Methyl(E)@9	Methyl(E)@101; Methyl(E)@102		0.0003554	1403.66	702.838	1403.66	702.837	2	14	1.1.1.2032.9	16.7744	5964.78	1497.63	16.92	0.19	129.833
tr|A0A498IWZ8|A0A498IWZ8_MALDO	Phosphoglycerate kinase OS=Malus domestica OX=3750 GN=DVH24_021907 PE=3 SV=1	78.55	0	99	IANDCIGEEVEK	Carbamidomethyl(C)@5			-0.000393718	1375.63	688.822	1375.63	688.822	2	9	1.1.1.1924.4	14.2405	82300.5	433.79	14.56	0.19	44.8477
tr|A0A498IWZ8|A0A498IWZ8_MALDO	Phosphoglycerate kinase OS=Malus domestica OX=3750 GN=DVH24_021907 PE=3 SV=1	78.55	0	98.41	IANDCIGEEVEK	Deamidated(N)@3; Carbamidomethyl(C)@5; Methyl(I)@6	Methyl(I)@99		-0.00532949	1390.62	696.319	1390.63	696.322	2	12	1.1.1.1987.4	15.7357	201.53	201.53			100.171
tr|A0A498IWZ8|A0A498IWZ8_MALDO	Phosphoglycerate kinase OS=Malus domestica OX=3750 GN=DVH24_021907 PE=3 SV=1	78.55	0	97.78	IANDCIGEEVEK	Carbamidomethyl(C)@5			0.00155104	1375.63	459.551	1375.63	459.55	3	11	1.1.1.1948.2	14.7981	6704.26	534.29	14.58	0.16	395.887
tr|A0A498IWZ8|A0A498IWZ8_MALDO	Phosphoglycerate kinase OS=Malus domestica OX=3750 GN=DVH24_021907 PE=3 SV=1	78.55	0	94.54	IANDCIGEEVEK	Methyl(D)@4; Carbamidomethyl(C)@5; Delta:H(4)C(2)(K)@12	Methyl(D)@97		0.0026223	1417.68	709.847	1417.68	709.845	2	10	1.1.1.2045.3	17.0751	1555.61	818.26	17.22	0.23	106.362
tr|A0A498IWZ8|A0A498IWZ8_MALDO	Phosphoglycerate kinase OS=Malus domestica OX=3750 GN=DVH24_021907 PE=3 SV=1	78.55	0	92.1	IANDCIGEEVEK	Deamidated(N)@3; Carbamidomethyl(C)@5; Delta:H(4)C(2)(K)@12			0.00230839	1404.65	703.331	1404.64	703.329	2	8	1.1.1.2093.6	18.1927	1419.41	672.58	18.48	0.45	124.822
tr|A0A498IWZ8|A0A498IWZ8_MALDO	Phosphoglycerate kinase OS=Malus domestica OX=3750 GN=DVH24_021907 PE=3 SV=1	78.55	0	78.61	IANDCIGEEVEK	Deamidated(N)@3; Carbamidomethyl(C)@5; Delta:H(4)C(2)(K)@12			0.00230839	1404.65	703.331	1404.64	703.329	2	9	1.1.1.2114.10	18.6948	1419.41	511.17	18.48	0.45	96.5984
tr|A0A498IWZ8|A0A498IWZ8_MALDO	Phosphoglycerate kinase OS=Malus domestica OX=3750 GN=DVH24_021907 PE=3 SV=1	78.55	0	77.5	IANDCIGEEVEK	Carbamidomethyl(C)@5; Methyl(E)@8	Methyl(E)@101		-0.00069063	1389.64	695.829	1389.64	695.83	2	7	1.1.1.1961.8	15.1244	16679.3	898.06	14.84	0.19	60.2157
tr|A0A498IWZ8|A0A498IWZ8_MALDO	Phosphoglycerate kinase OS=Malus domestica OX=3750 GN=DVH24_021907 PE=3 SV=1	78.55	0	77.5	IANDCIGEEVEK	Carbamidomethyl(C)@5; Methyl(E)@9	Methyl(E)@102		-0.00069063	1389.64	695.829	1389.64	695.83	2	7	1.1.1.1961.8	15.1244	16679.3	898.06	14.84	0.19	60.2157
tr|A0A498IWZ8|A0A498IWZ8_MALDO	Phosphoglycerate kinase OS=Malus domestica OX=3750 GN=DVH24_021907 PE=3 SV=1	78.55	0	77.5	IANDCIGEEVEK	Methyl(D)@4; Carbamidomethyl(C)@5	Methyl(D)@97		-0.00069063	1389.64	695.829	1389.64	695.83	2	7	1.1.1.1961.8	15.1244	16679.3	898.06	14.84	0.19	60.2157
tr|A0A498IWZ8|A0A498IWZ8_MALDO	Phosphoglycerate kinase OS=Malus domestica OX=3750 GN=DVH24_021907 PE=3 SV=1	78.55	0	72.73	IANDCIGEEVEK	Deamidated(N)@3; Carbamidomethyl(C)@5			0.00393076	1376.62	459.88	1376.61	459.878	3	7	1.1.1.1972.5	15.3764	355.28	339.12	15.37	0.29	253.793
tr|A0A498IWZ8|A0A498IWZ8_MALDO	Phosphoglycerate kinase OS=Malus domestica OX=3750 GN=DVH24_021907 PE=3 SV=1	78.55	0	51.27	IANDCIGEEVEK	Methyl(D)@4; Carbamidomethyl(C)@5	Methyl(D)@97		-0.000675606	1389.64	464.222	1389.64	464.222	3	8	1.1.1.1943.4	14.6824	1777	526.55	14.84	0.24	367.969
tr|A0A498IWZ8|A0A498IWZ8_MALDO	Phosphoglycerate kinase OS=Malus domestica OX=3750 GN=DVH24_021907 PE=3 SV=1	78.55	0	43.36	IANDCIGEEVEK	Carbamidomethyl(C)@5; Delta:H(4)C(2)(K)@12			0.00185871	1403.66	468.895	1403.66	468.894	3	9	1.1.1.2071.5	17.6823	1394.19	1031.57	17.79	0.26	584.117
tr|A0A498IWZ8|A0A498IWZ8_MALDO	Phosphoglycerate kinase OS=Malus domestica OX=3750 GN=DVH24_021907 PE=3 SV=1	78.55	0	42.75	IANDCIGEEVEK	Methyl(D)@4; Carbamidomethyl(C)@5; Dimethyl(K)@12	Methyl(D)@97; Dimethyl(K)@105		0.0026223	1417.68	709.847	1417.68	709.845	2	10	1.1.1.2045.3	17.0751	1555.61	818.26	17.22	0.23	106.362
tr|A0A498IWZ8|A0A498IWZ8_MALDO	Phosphoglycerate kinase OS=Malus domestica OX=3750 GN=DVH24_021907 PE=3 SV=1	78.55	0	42.75	IANDCIGEEVEK	Deamidated(N)@3; Carbamidomethyl(C)@5; Dimethyl(K)@12	Dimethyl(K)@105		0.00230839	1404.65	703.331	1404.64	703.329	2	8	1.1.1.2093.6	18.1927	1419.41	672.58	18.48	0.45	124.822
tr|A0A498IWZ8|A0A498IWZ8_MALDO	Phosphoglycerate kinase OS=Malus domestica OX=3750 GN=DVH24_021907 PE=3 SV=1	78.55	0	38.69	IANDCIGEEVEK	Deamidated(N)@3; Carbamidomethyl(C)@5; Dimethyl(K)@12	Dimethyl(K)@105		0.00230839	1404.65	703.331	1404.64	703.329	2	9	1.1.1.2114.10	18.6948	1419.41	511.17	18.48	0.45	96.5984
tr|A0A498IWZ8|A0A498IWZ8_MALDO	Phosphoglycerate kinase OS=Malus domestica OX=3750 GN=DVH24_021907 PE=3 SV=1	78.55	0	29.58	IANDCIGEEVEK	Oxidation(D)@4; Carbamidomethyl(C)@5	Oxidation(D)@97		0.00969626	1391.63	464.885	1391.62	464.882	3	8	1.1.1.1955.3	14.9694	279.45	177.06	14.77	0.29	238.318
tr|A0A498IWZ8|A0A498IWZ8_MALDO	Phosphoglycerate kinase OS=Malus domestica OX=3750 GN=DVH24_021907 PE=3 SV=1	78.55	0	29.23	IANDCIGEEVEK	Carbamidomethyl(C)@5; Dimethyl(K)@12	Dimethyl(K)@105		0.00185871	1403.66	468.895	1403.66	468.894	3	9	1.1.1.2071.5	17.6823	1394.19	1031.57	17.79	0.26	584.117
tr|A0A498IWZ8|A0A498IWZ8_MALDO	Phosphoglycerate kinase OS=Malus domestica OX=3750 GN=DVH24_021907 PE=3 SV=1	78.55	0	19.51	IANDCIGEEVEK	Carbamidomethyl(C)@5; Methyl(I)@6; Delta:H(4)C(2)(K)@12	Methyl(I)@99		0.0026223	1417.68	709.847	1417.68	709.845	2	10	1.1.1.2045.3	17.0751	1555.61	818.26	17.22	0.23	106.362
tr|A0A498IWZ8|A0A498IWZ8_MALDO	Phosphoglycerate kinase OS=Malus domestica OX=3750 GN=DVH24_021907 PE=3 SV=1	78.55	0	19.36	IANDCIGEEVEK	Carbamidomethyl(C)@5; Methyl(I)@6	Methyl(I)@99		-0.00069063	1389.64	695.829	1389.64	695.83	2	6	1.1.1.1940.6	14.621	16679.3	949.66	14.84	0.19	50.8575
tr|A0A498IWZ8|A0A498IWZ8_MALDO	Phosphoglycerate kinase OS=Malus domestica OX=3750 GN=DVH24_021907 PE=3 SV=1	78.55	0	19.04	IANDCIGEEVEK	Carbamidomethyl(C)@5; Methyl(I)@6	Methyl(I)@99		-0.00069063	1389.64	695.829	1389.64	695.83	2	7	1.1.1.1961.8	15.1244	16679.3	898.06	14.84	0.19	60.2157
tr|A0A498IWZ8|A0A498IWZ8_MALDO	Phosphoglycerate kinase OS=Malus domestica OX=3750 GN=DVH24_021907 PE=3 SV=1	78.55	0	17.57	IANDCIGEEVEK	Carbamidomethyl(C)@5; Methyl(I)@6; Dimethyl(K)@12	Methyl(I)@99; Dimethyl(K)@105		0.0026223	1417.68	709.847	1417.68	709.845	2	10	1.1.1.2045.3	17.0751	1555.61	818.26	17.22	0.23	106.362
tr|A0A498IWZ8|A0A498IWZ8_MALDO	Phosphoglycerate kinase OS=Malus domestica OX=3750 GN=DVH24_021907 PE=3 SV=1	78.55	0	17.23	IANDCIGEEVEK	Carbamidomethyl(C)@5; Methyl(I)@6; Delta:H(4)C(2)(K)@12	Methyl(I)@99		-0.00103984	1417.67	709.845	1417.68	709.845	2	7	1.1.1.2075.15	17.7859	3900.38	716.32	18.03	0.29	108.262
tr|A0A498IWZ8|A0A498IWZ8_MALDO	Phosphoglycerate kinase OS=Malus domestica OX=3750 GN=DVH24_021907 PE=3 SV=1	78.55	0	17.22	IANDCIGEEVEK	Deamidated(N)@3; Methyl(D)@4; Carbamidomethyl(C)@5	Methyl(D)@97		-0.00532949	1390.62	696.319	1390.63	696.322	2	11	1.1.1.1987.4	15.7357	201.53	201.53			100.171
tr|A0A498IWZ8|A0A498IWZ8_MALDO	Phosphoglycerate kinase OS=Malus domestica OX=3750 GN=DVH24_021907 PE=3 SV=1	78.55	0	17.21	IANDCIGEEVEK	Carbamidomethyl(C)@5; Methyl(I)@6; Dimethyl(K)@12	Methyl(I)@99; Dimethyl(K)@105		-0.00103984	1417.67	709.845	1417.68	709.845	2	7	1.1.1.2075.15	17.7859	3900.38	716.32	18.03	0.29	108.262
tr|A0A498IWZ8|A0A498IWZ8_MALDO	Phosphoglycerate kinase OS=Malus domestica OX=3750 GN=DVH24_021907 PE=3 SV=1	78.55	0	99	IGVIESLLAK				-0.00160533	1041.64	521.828	1041.64	521.829	2	11	1.1.1.2433.3	26.2447	181763	1998.96	25.62	0.35	189.854
tr|A0A498IWZ8|A0A498IWZ8_MALDO	Phosphoglycerate kinase OS=Malus domestica OX=3750 GN=DVH24_021907 PE=3 SV=1	78.55	0	98.92	IGVIESLLAK				-0.00160533	1041.64	521.828	1041.64	521.829	2	8	1.1.1.2417.7	25.8663	181763	56664.1	25.62	0.35	833.587
tr|A0A498IWZ8|A0A498IWZ8_MALDO	Phosphoglycerate kinase OS=Malus domestica OX=3750 GN=DVH24_021907 PE=3 SV=1	78.55	0	95.71	IGVIESLLAK				-0.00160533	1041.64	521.828	1041.64	521.829	2	5	1.1.1.2390.5	25.2254	181763	1027.45	25.62	0.35	125.903
tr|A0A498IWZ8|A0A498IWZ8_MALDO	Phosphoglycerate kinase OS=Malus domestica OX=3750 GN=DVH24_021907 PE=3 SV=1	78.55	0	82.52	IGVIESLLAK				-0.00160533	1041.64	521.828	1041.64	521.829	2	5	1.1.1.2454.4	26.7493	181763	561.7	25.62	0.35	85.4227
tr|A0A498IWZ8|A0A498IWZ8_MALDO	Phosphoglycerate kinase OS=Malus domestica OX=3750 GN=DVH24_021907 PE=3 SV=1	78.55	0	73.92	IGVIESLLAK	Delta:H(4)C(2)(K)@10			-0.000763808	1069.67	535.844	1069.67	535.845	2	7	1.1.1.2498.7	27.8406	2881.91	1243.68	28.05	0.37	116.839
tr|A0A498IWZ8|A0A498IWZ8_MALDO	Phosphoglycerate kinase OS=Malus domestica OX=3750 GN=DVH24_021907 PE=3 SV=1	78.55	0	60.65	IGVIESLLAK				0.000103666	1041.64	521.829	1041.64	521.829	2	4	1.1.1.2475.3	27.2654	456.55	314.57	27.01	0.35	67.5622
tr|A0A498IWZ8|A0A498IWZ8_MALDO	Phosphoglycerate kinase OS=Malus domestica OX=3750 GN=DVH24_021907 PE=3 SV=1	78.55	0	59.25	IGVIESLLAK	Dimethyl(K)@10	Dimethyl(K)@216		-0.000763808	1069.67	535.844	1069.67	535.845	2	7	1.1.1.2498.7	27.8406	2881.91	1243.68	28.05	0.37	116.839
tr|A0A498IWZ8|A0A498IWZ8_MALDO	Phosphoglycerate kinase OS=Malus domestica OX=3750 GN=DVH24_021907 PE=3 SV=1	78.55	0	56.81	KLAELSGKGVTTIIGGGDSVAAVEK	Carbamyl(K)@1		missed K-L@1; missed K-G@8	0.00184684	2442.33	815.119	2442.33	815.118	3	7	1.1.1.2285.15	22.7214	1611.25	782.82	22.85	0.24	113.659
tr|A0A498IWZ8|A0A498IWZ8_MALDO	Phosphoglycerate kinase OS=Malus domestica OX=3750 GN=DVH24_021907 PE=3 SV=1	78.55	0	31.11	KSVSTLKEAELK			missed K-S@1; missed K-E@7	0.000637542	1331.77	444.93	1331.77	444.929	3	6	1.1.1.1803.3	11.6343	861.17	487.72	11.74	0.27	71.1415
tr|A0A498IWZ8|A0A498IWZ8_MALDO	Phosphoglycerate kinase OS=Malus domestica OX=3750 GN=DVH24_021907 PE=3 SV=1	78.55	0	20.3	KSVSTLKEAELK	Carbamyl(K)@1		missed K-S@1; missed K-E@7	-0.00112552	1374.77	459.264	1374.77	459.265	3	11	1.1.1.1941.7	14.6446	4183.6	4129.3	14.65	0.19	726.198
tr|A0A498IWZ8|A0A498IWZ8_MALDO	Phosphoglycerate kinase OS=Malus domestica OX=3750 GN=DVH24_021907 PE=3 SV=1	78.55	0	18.44	LAELSGKGVTTIIGGGDSVAAVEK	Carbamidomethyl(T)@10		missed K-G@7	-0.00519558	2328.25	777.09	2328.25	777.092	3	18	1.1.1.2245.3	21.7592	159.958	159.958			176.035
tr|A0A498IWZ8|A0A498IWZ8_MALDO	Phosphoglycerate kinase OS=Malus domestica OX=3750 GN=DVH24_021907 PE=3 SV=1	78.55	0	99	LASLADVYVNDAFGTAHR				0.00179214	1918.96	640.659	1918.95	640.659	3	20	1.1.1.2380.14	24.985	62479.1	23568.3	24.83	0.3	2140.47
tr|A0A498IWZ8|A0A498IWZ8_MALDO	Phosphoglycerate kinase OS=Malus domestica OX=3750 GN=DVH24_021907 PE=3 SV=1	78.55	0	99	LASLADVYVNDAFGTAHR				0.00179214	1918.96	640.659	1918.95	640.659	3	10	1.1.1.2358.11	24.4675	62479.1	1653.05	24.83	0.3	307.637
tr|A0A498IWZ8|A0A498IWZ8_MALDO	Phosphoglycerate kinase OS=Malus domestica OX=3750 GN=DVH24_021907 PE=3 SV=1	78.55	0	99	LASLADVYVNDAFGTAHR	Deamidated(N)@10			-0.00626562	1919.93	640.984	1919.94	640.987	3	11	1.1.1.2331.11	23.8156	402.45	238.04	23.87	0.36	279.131
tr|A0A498IWZ8|A0A498IWZ8_MALDO	Phosphoglycerate kinase OS=Malus domestica OX=3750 GN=DVH24_021907 PE=3 SV=1	78.55	0	99	LASLADVYVNDAFGTAHR				-0.000781877	1918.95	480.745	1918.95	480.746	4	10	1.1.1.2380.3	24.9758	5772.78	2230.9	24.75	0.3	295.043
tr|A0A498IWZ8|A0A498IWZ8_MALDO	Phosphoglycerate kinase OS=Malus domestica OX=3750 GN=DVH24_021907 PE=3 SV=1	78.55	0	99	LASLADVYVNDAFGTAHR	Deamidated(N)@10			0.0215559	1919.96	480.997	1919.94	480.992	4	9	1.1.1.2383.4	25.0499	1765.81	545.33	24.9	0.15	528.981
tr|A0A498IWZ8|A0A498IWZ8_MALDO	Phosphoglycerate kinase OS=Malus domestica OX=3750 GN=DVH24_021907 PE=3 SV=1	78.55	0	99	LASLADVYVNDAFGTAHR	Deamidated(N)@10			0.00837218	1919.95	480.994	1919.94	480.992	4	8	1.1.1.2307.8	23.247	342.42	303.46	23.29	0.17	309.686
tr|A0A498IWZ8|A0A498IWZ8_MALDO	Phosphoglycerate kinase OS=Malus domestica OX=3750 GN=DVH24_021907 PE=3 SV=1	78.55	0	49.38	LASLADVYVNDAFGTAHR				-0.000781877	1918.95	480.745	1918.95	480.746	4	6	1.1.1.2365.4	24.6335	5772.78	2966.35	24.75	0.3	244.667
tr|A0A498IWZ8|A0A498IWZ8_MALDO	Phosphoglycerate kinase OS=Malus domestica OX=3750 GN=DVH24_021907 PE=3 SV=1	78.55	0	28.06	LASLADVYVNDAFGTAHR	Carbamidomethyl(H)@17			0.00116773	1975.98	659.666	1975.98	659.666	3	8	1.1.1.2365.14	24.6418	1631.87	1563.95	24.68	0.29	396.794
tr|A0A498IWZ8|A0A498IWZ8_MALDO	Phosphoglycerate kinase OS=Malus domestica OX=3750 GN=DVH24_021907 PE=3 SV=1	78.55	0	99	LSELLGLEVK				-0.00174972	1099.65	550.831	1099.65	550.832	2	14	1.1.1.2346.6	24.1717	445295	5493.64	23.5	0.28	520.685
tr|A0A498IWZ8|A0A498IWZ8_MALDO	Phosphoglycerate kinase OS=Malus domestica OX=3750 GN=DVH24_021907 PE=3 SV=1	78.55	0	99	LSELLGLEVK				-0.00174972	1099.65	550.831	1099.65	550.832	2	11	1.1.1.2367.3	24.6816	445295	2015.41	23.5	0.28	278.151
tr|A0A498IWZ8|A0A498IWZ8_MALDO	Phosphoglycerate kinase OS=Malus domestica OX=3750 GN=DVH24_021907 PE=3 SV=1	78.55	0	99	LSELLGLEVK				0.00838217	1099.66	550.836	1099.65	550.832	2	10	1.1.1.2547.2	29.0372	30.114	30.114			73.8592
tr|A0A498IWZ8|A0A498IWZ8_MALDO	Phosphoglycerate kinase OS=Malus domestica OX=3750 GN=DVH24_021907 PE=3 SV=1	78.55	0	99	LSELLGLEVK				-4.07286e-05	1099.65	550.832	1099.65	550.832	2	10	1.1.1.2571.3	29.6151	573.51	380.36	29.85	0.88	70.9916
tr|A0A498IWZ8|A0A498IWZ8_MALDO	Phosphoglycerate kinase OS=Malus domestica OX=3750 GN=DVH24_021907 PE=3 SV=1	78.55	0	99	LSELLGLEVK				-0.000773155	1099.65	550.831	1099.65	550.832	2	10	1.1.1.2453.4	26.7249	1030.8	752.28	26.57	0.46	89.5207
tr|A0A498IWZ8|A0A498IWZ8_MALDO	Phosphoglycerate kinase OS=Malus domestica OX=3750 GN=DVH24_021907 PE=3 SV=1	78.55	0	99	LSELLGLEVK				-0.00223801	1099.65	550.831	1099.65	550.832	2	9	1.1.1.2517.5	28.3141	512.77	440.62	28.27	0.82	87.3901
tr|A0A498IWZ8|A0A498IWZ8_MALDO	Phosphoglycerate kinase OS=Malus domestica OX=3750 GN=DVH24_021907 PE=3 SV=1	78.55	0	99	LSELLGLEVK				-0.0010173	1099.65	550.831	1099.65	550.832	2	8	1.1.1.2474.8	27.2465	591.3	498.24	27.38	0.42	75.9272
tr|A0A498IWZ8|A0A498IWZ8_MALDO	Phosphoglycerate kinase OS=Malus domestica OX=3750 GN=DVH24_021907 PE=3 SV=1	78.55	0	99	LSELLGLEVK				-0.0001628	1099.65	550.832	1099.65	550.832	2	7	1.1.1.2389.9	25.2009	1536.39	1209.03	25.14	0.32	274.902
tr|A0A498IWZ8|A0A498IWZ8_MALDO	Phosphoglycerate kinase OS=Malus domestica OX=3750 GN=DVH24_021907 PE=3 SV=1	78.55	0	99	LSELLGLEVK	Methyl(E)@3; Methyl(L)@4	Methyl(E)@86; Methyl(L)@87		0.000191442	1127.68	564.847	1127.68	564.847	2	14	1.1.1.2445.5	26.531	16753.6	12119.4	26.4	0.38	869.735
tr|A0A498IWZ8|A0A498IWZ8_MALDO	Phosphoglycerate kinase OS=Malus domestica OX=3750 GN=DVH24_021907 PE=3 SV=1	78.55	0	99	LSELLGLEVK	Methyl(S)@2; Methyl(E)@3	Methyl(S)@85; Methyl(E)@86		0.000191442	1127.68	564.847	1127.68	564.847	2	14	1.1.1.2445.5	26.531	16753.6	12119.4	26.4	0.38	869.735
tr|A0A498IWZ8|A0A498IWZ8_MALDO	Phosphoglycerate kinase OS=Malus domestica OX=3750 GN=DVH24_021907 PE=3 SV=1	78.55	0	99	LSELLGLEVK				-0.00174972	1099.65	550.831	1099.65	550.832	2	9	1.1.1.2332.7	23.8341	445295	52390.8	23.5	0.28	1008.8
tr|A0A498IWZ8|A0A498IWZ8_MALDO	Phosphoglycerate kinase OS=Malus domestica OX=3750 GN=DVH24_021907 PE=3 SV=1	78.55	0	95.71	LSELLGLEVK				-4.07286e-05	1099.65	550.832	1099.65	550.832	2	5	1.1.1.2595.7	30.2109	573.51	379.26	29.85	0.88	83.0434
tr|A0A498IWZ8|A0A498IWZ8_MALDO	Phosphoglycerate kinase OS=Malus domestica OX=3750 GN=DVH24_021907 PE=3 SV=1	78.55	0	84.48	LSELLGLEVK				-0.00174972	1099.65	550.831	1099.65	550.832	2	5	1.1.1.2303.7	23.1484	445295	596.69	23.5	0.28	113.479
tr|A0A498IWZ8|A0A498IWZ8_MALDO	Phosphoglycerate kinase OS=Malus domestica OX=3750 GN=DVH24_021907 PE=3 SV=1	78.55	0	67.59	LSELLGLEVK	Delta:H(4)C(2)@N-term			0.000191442	1127.68	564.847	1127.68	564.847	2	13	1.1.1.2445.5	26.531	16753.6	12119.4	26.4	0.38	869.735
tr|A0A498IWZ8|A0A498IWZ8_MALDO	Phosphoglycerate kinase OS=Malus domestica OX=3750 GN=DVH24_021907 PE=3 SV=1	78.55	0	41.85	LSELLGLEVK	Delta:H(4)C(2)(K)@10			0.000191442	1127.68	564.847	1127.68	564.847	2	5	1.1.1.2423.6	26.0089	16753.6	693.71	26.4	0.38	80.9444
tr|A0A498IWZ8|A0A498IWZ8_MALDO	Phosphoglycerate kinase OS=Malus domestica OX=3750 GN=DVH24_021907 PE=3 SV=1	78.55	0	36.72	LSELLGLEVK	Dimethyl(K)@10	Dimethyl(K)@93		0.000191442	1127.68	564.847	1127.68	564.847	2	5	1.1.1.2423.6	26.0089	16753.6	693.71	26.4	0.38	80.9444
tr|A0A498IWZ8|A0A498IWZ8_MALDO	Phosphoglycerate kinase OS=Malus domestica OX=3750 GN=DVH24_021907 PE=3 SV=1	78.55	0	33.95	LSELLGLEVK	HexNAc(S)@2	HexNAc(S)@85		-0.0172077	1302.71	652.363	1302.73	652.371	2	7	1.1.1.2323.3	23.6247	819.15	542.61	23.66	0.23	756.635
tr|A0A498IWZ8|A0A498IWZ8_MALDO	Phosphoglycerate kinase OS=Malus domestica OX=3750 GN=DVH24_021907 PE=3 SV=1	78.55	0	99	LVAQLPEGGVLLLENVR				0.00190415	1819.06	607.36	1819.06	607.359	3	24	1.1.1.2539.3	28.8449	74511.9	72965.9	28.86	0.34	10608.6
tr|A0A498IWZ8|A0A498IWZ8_MALDO	Phosphoglycerate kinase OS=Malus domestica OX=3750 GN=DVH24_021907 PE=3 SV=1	78.55	0	99	LVAQLPEGGVLLLENVR				0.00190415	1819.06	607.36	1819.06	607.359	3	15	1.1.1.2568.2	29.5406	74511.9	1030.25	28.86	0.34	301.913
tr|A0A498IWZ8|A0A498IWZ8_MALDO	Phosphoglycerate kinase OS=Malus domestica OX=3750 GN=DVH24_021907 PE=3 SV=1	78.55	0	99	LVAQLPEGGVLLLENVR	Cation:Na(E)@7			-0.00103175	1841.04	614.687	1841.04	614.687	3	12	1.1.1.2534.7	28.7302	3686.15	1339.09	28.91	0.26	216.81
tr|A0A498IWZ8|A0A498IWZ8_MALDO	Phosphoglycerate kinase OS=Malus domestica OX=3750 GN=DVH24_021907 PE=3 SV=1	78.55	0	95.71	LVAQLPEGGVLLLENVR				-0.00322283	1819.05	607.359	1819.06	607.359	3	6	1.1.1.2589.5	30.0588	596.06	577.13	30.05	0.12	336.223
tr|A0A498IWZ8|A0A498IWZ8_MALDO	Phosphoglycerate kinase OS=Malus domestica OX=3750 GN=DVH24_021907 PE=3 SV=1	78.55	0	94.17	LVAQLPEGGVLLLENVR				-0.00267351	1819.05	607.359	1819.06	607.359	3	7	1.1.1.2518.6	28.3372	2196.17	270.29	27.97	0.27	161.667
tr|A0A498IWZ8|A0A498IWZ8_MALDO	Phosphoglycerate kinase OS=Malus domestica OX=3750 GN=DVH24_021907 PE=3 SV=1	78.55	0	40.41	LVAQLPEGGVLLLENVR	Cation:Na(E)@7; Deamidated(N)@15			0.00427724	1842.03	615.016	1842.02	615.015	3	8	1.1.1.2562.4	29.4125	479.54	251.15	29.3	0.17	111.129
tr|A0A498IWZ8|A0A498IWZ8_MALDO	Phosphoglycerate kinase OS=Malus domestica OX=3750 GN=DVH24_021907 PE=3 SV=1	78.55	0	17.23	LVAQLPEGGVLLLENVR				-0.000476232	1819.06	607.359	1819.06	607.359	3	5	1.1.1.2471.8	27.1741	299.25	198.04	27.09	0.22	165.984
tr|A0A498IWZ8|A0A498IWZ8_MALDO	Phosphoglycerate kinase OS=Malus domestica OX=3750 GN=DVH24_021907 PE=3 SV=1	78.55	0	72.73	MSHISTGGGASL			cleaved L-E@C-term	-0.00333042	1116.52	559.267	1116.52	559.269	2	7	1.1.1.1945.6	14.7338	287.43	285.13	14.72	0.43	74.9087
tr|A0A498IWZ8|A0A498IWZ8_MALDO	Phosphoglycerate kinase OS=Malus domestica OX=3750 GN=DVH24_021907 PE=3 SV=1	78.55	0	99	MSHISTGGGASLELLEGK	Oxidation(M)@1			0.00119441	1801.89	601.637	1801.89	601.637	3	15	1.1.1.2192.13	20.4907	29241.5	10377.3	20.26	0.31	1219.85
tr|A0A498IWZ8|A0A498IWZ8_MALDO	Phosphoglycerate kinase OS=Malus domestica OX=3750 GN=DVH24_021907 PE=3 SV=1	78.55	0	99	MSHISTGGGASLELLEGK	Oxidation(M)@1			0.00119441	1801.89	601.637	1801.89	601.637	3	10	1.1.1.2208.5	20.8736	29241.5	1189.23	20.26	0.31	411.537
tr|A0A498IWZ8|A0A498IWZ8_MALDO	Phosphoglycerate kinase OS=Malus domestica OX=3750 GN=DVH24_021907 PE=3 SV=1	78.55	0	96.13	MSHISTGGGASLELLEGK	Oxidation(M)@1			0.00119441	1801.89	601.637	1801.89	601.637	3	10	1.1.1.2192.14	20.4916	29241.5	10316	20.26	0.31	585.704
tr|A0A498IWZ8|A0A498IWZ8_MALDO	Phosphoglycerate kinase OS=Malus domestica OX=3750 GN=DVH24_021907 PE=3 SV=1	78.55	0	99	PRLSELLGLEVK	Dioxidation(R)@2	Dioxidation(R)@83	cleaved V-P@N-term; missed R-L@2	0.0137884	1384.81	693.41	1384.79	693.404	2	9	1.1.1.2321.6	23.5823	915.95	411.82	23.45	0.36	290.756
tr|A0A498IWZ8|A0A498IWZ8_MALDO	Phosphoglycerate kinase OS=Malus domestica OX=3750 GN=DVH24_021907 PE=3 SV=1	78.55	0	99	PRLSELLGLEVK	Dioxidation(P)@1	Dioxidation(P)@82	cleaved V-P@N-term; missed R-L@2	0.0137884	1384.81	693.41	1384.79	693.404	2	9	1.1.1.2321.6	23.5823	915.95	411.82	23.45	0.36	290.756
tr|A0A498IWZ8|A0A498IWZ8_MALDO	Phosphoglycerate kinase OS=Malus domestica OX=3750 GN=DVH24_021907 PE=3 SV=1	78.55	0	76.12	PRLSELLGLEVK	Oxidation(P)@1; Oxidation(R)@2	Oxidation(P)@82; Oxidation(R)@83	cleaved V-P@N-term; missed R-L@2	0.0137884	1384.81	693.41	1384.79	693.404	2	9	1.1.1.2321.6	23.5823	915.95	411.82	23.45	0.36	290.756
tr|A0A498IWZ8|A0A498IWZ8_MALDO	Phosphoglycerate kinase OS=Malus domestica OX=3750 GN=DVH24_021907 PE=3 SV=1	78.55	0	89.93	PSVAGFLMQKELDYLVGAVSNPK	Carbamidomethyl@N-term; Oxidation(M)@8; Deamidated(Q)@9		cleaved K-P@N-term; missed K-E@10	0.0598371	2536.35	846.457	2536.29	846.437	3	11	1.1.1.2245.4	21.765	159.958	159.958			53.2437
tr|A0A498IWZ8|A0A498IWZ8_MALDO	Phosphoglycerate kinase OS=Malus domestica OX=3750 GN=DVH24_021907 PE=3 SV=1	78.55	0	30.71	PSVAGFLMQKELDYLVGAVSNPK	Oxidation(P)@1; Dethiomethyl(M)@8; Carbamyl(K)@10	Oxidation(P)@169	cleaved K-P@N-term; missed K-E@10	0.0300267	2473.32	825.446	2473.29	825.436	3	10	1.1.1.2243.6	21.715	126.478	126.478			214.68
tr|A0A498IWZ8|A0A498IWZ8_MALDO	Phosphoglycerate kinase OS=Malus domestica OX=3750 GN=DVH24_021907 PE=3 SV=1	78.55	0	99	QKELDYLVGAVSNPK	Formyl(K)@2		cleaved M-Q@N-term; missed K-E@2	-0.00131876	1687.88	844.946	1687.88	844.946	2	11	1.1.1.2241.3	21.6633	96.7687	96.7687			161.649
tr|A0A498IWZ8|A0A498IWZ8_MALDO	Phosphoglycerate kinase OS=Malus domestica OX=3750 GN=DVH24_021907 PE=3 SV=1	78.55	0	99	QKELDYLVGAVSNPK	Formyl@N-term		cleaved M-Q@N-term; missed K-E@2	-0.00131876	1687.88	844.946	1687.88	844.946	2	11	1.1.1.2241.3	21.6633	96.7687	96.7687			161.649
tr|A0A498IWZ8|A0A498IWZ8_MALDO	Phosphoglycerate kinase OS=Malus domestica OX=3750 GN=DVH24_021907 PE=3 SV=1	78.55	0	17.25	RPFAAIVG			cleaved G-G@C-term	0.00204252	829.483	415.749	829.481	415.748	2	5	1.1.1.2121.2	18.8486	2173.81	1672.72	18.72	0.34	440.504
tr|A0A498IWZ8|A0A498IWZ8_MALDO	Phosphoglycerate kinase OS=Malus domestica OX=3750 GN=DVH24_021907 PE=3 SV=1	78.55	0	80.72	RPFAAIVGGSK				-0.00151459	1101.63	551.821	1101.63	551.822	2	7	1.1.1.2015.9	16.3831	15747.9	915.07	15.72	0.44	122.586
tr|A0A498IWZ8|A0A498IWZ8_MALDO	Phosphoglycerate kinase OS=Malus domestica OX=3750 GN=DVH24_021907 PE=3 SV=1	78.55	0	99	SKGVSILLPTDVVIADK			missed K-G@2	-0.0013984	1754.02	585.68	1754.02	585.68	3	13	1.1.1.2357.4	24.4372	5831.06	5550.44	24.48	0.29	555.669
tr|A0A498IWZ8|A0A498IWZ8_MALDO	Phosphoglycerate kinase OS=Malus domestica OX=3750 GN=DVH24_021907 PE=3 SV=1	78.55	0	99	SKGVSILLPTDVVIADK			missed K-G@2	-0.0013984	1754.02	585.68	1754.02	585.68	3	15	1.1.1.2359.9	24.4904	5831.06	5812.85	24.48	0.29	580.557
tr|A0A498IWZ8|A0A498IWZ8_MALDO	Phosphoglycerate kinase OS=Malus domestica OX=3750 GN=DVH24_021907 PE=3 SV=1	78.55	0	99	SKGVSILLPTDVVIADK			missed K-G@2	-0.0013984	1754.02	585.68	1754.02	585.68	3	13	1.1.1.2362.6	24.5638	5831.06	4751.54	24.48	0.29	546.004
tr|A0A498IWZ8|A0A498IWZ8_MALDO	Phosphoglycerate kinase OS=Malus domestica OX=3750 GN=DVH24_021907 PE=3 SV=1	78.55	0	99	SKGVSILLPTDVVIADK			missed K-G@2	-0.0013984	1754.02	585.68	1754.02	585.68	3	10	1.1.1.2355.10	24.3933	5831.06	4647.96	24.48	0.29	557.568
tr|A0A498IWZ8|A0A498IWZ8_MALDO	Phosphoglycerate kinase OS=Malus domestica OX=3750 GN=DVH24_021907 PE=3 SV=1	78.55	0	99	SKGVSILLPTDVVIADK			missed K-G@2	-0.0013984	1754.02	585.68	1754.02	585.68	3	11	1.1.1.2360.7	24.5132	5831.06	5698.22	24.48	0.29	628.084
tr|A0A498IWZ8|A0A498IWZ8_MALDO	Phosphoglycerate kinase OS=Malus domestica OX=3750 GN=DVH24_021907 PE=3 SV=1	78.55	0	99	SKGVSILLPTDVVIADK			missed K-G@2	-0.0013984	1754.02	585.68	1754.02	585.68	3	12	1.1.1.2363.7	24.5935	5831.06	4021.44	24.48	0.29	505.054
tr|A0A498IWZ8|A0A498IWZ8_MALDO	Phosphoglycerate kinase OS=Malus domestica OX=3750 GN=DVH24_021907 PE=3 SV=1	78.55	0	99	SKGVSILLPTDVVIADK			missed K-G@2	-0.0013984	1754.02	585.68	1754.02	585.68	3	9	1.1.1.2356.8	24.416	5831.06	5137.68	24.48	0.29	560.616
tr|A0A498IWZ8|A0A498IWZ8_MALDO	Phosphoglycerate kinase OS=Malus domestica OX=3750 GN=DVH24_021907 PE=3 SV=1	78.55	0	99	SKGVSILLPTDVVIADK			missed K-G@2	-0.0013984	1754.02	585.68	1754.02	585.68	3	10	1.1.1.2356.9	24.4169	5831.06	5158.25	24.48	0.29	1191.97
tr|A0A498IWZ8|A0A498IWZ8_MALDO	Phosphoglycerate kinase OS=Malus domestica OX=3750 GN=DVH24_021907 PE=3 SV=1	78.55	0	99	SKGVSILLPTDVVIADK			missed K-G@2	-0.0013984	1754.02	585.68	1754.02	585.68	3	10	1.1.1.2358.6	24.4634	5831.06	5695.9	24.48	0.29	614.091
tr|A0A498IWZ8|A0A498IWZ8_MALDO	Phosphoglycerate kinase OS=Malus domestica OX=3750 GN=DVH24_021907 PE=3 SV=1	78.55	0	99	SKGVSILLPTDVVIADK			missed K-G@2	-0.0013984	1754.02	585.68	1754.02	585.68	3	8	1.1.1.2364.11	24.6148	5831.06	3565.45	24.48	0.29	465.961
tr|A0A498IWZ8|A0A498IWZ8_MALDO	Phosphoglycerate kinase OS=Malus domestica OX=3750 GN=DVH24_021907 PE=3 SV=1	78.55	0	99	SKGVSILLPTDVVIADK			missed K-G@2	-0.0013984	1754.02	585.68	1754.02	585.68	3	8	1.1.1.2365.8	24.6368	5831.06	3100.87	24.48	0.29	425.031
tr|A0A498IWZ8|A0A498IWZ8_MALDO	Phosphoglycerate kinase OS=Malus domestica OX=3750 GN=DVH24_021907 PE=3 SV=1	78.55	0	99	SKGVSILLPTDVVIADK			missed K-G@2	-0.0013984	1754.02	585.68	1754.02	585.68	3	8	1.1.1.2366.7	24.6606	5831.06	2567.58	24.48	0.29	356.963
tr|A0A498IWZ8|A0A498IWZ8_MALDO	Phosphoglycerate kinase OS=Malus domestica OX=3750 GN=DVH24_021907 PE=3 SV=1	78.55	0	94.17	SKGVSILLPTDVVIADK			missed K-G@2	-0.0013984	1754.02	585.68	1754.02	585.68	3	7	1.1.1.2355.11	24.3941	5831.06	4664.28	24.48	0.29	287.696
tr|A0A498IWZ8|A0A498IWZ8_MALDO	Phosphoglycerate kinase OS=Malus domestica OX=3750 GN=DVH24_021907 PE=3 SV=1	78.55	0	63.86	SKGVSILLPTDVVIADK			missed K-G@2	-0.0013984	1754.02	585.68	1754.02	585.68	3	5	1.1.1.2367.6	24.6841	5831.06	2009.51	24.48	0.29	279.3
tr|A0A498IWZ8|A0A498IWZ8_MALDO	Phosphoglycerate kinase OS=Malus domestica OX=3750 GN=DVH24_021907 PE=3 SV=1	78.55	0	18	SKGVSILLPTDVVIADK			missed K-G@2	-0.0013984	1754.02	585.68	1754.02	585.68	3	5	1.1.1.2369.6	24.7329	5831.06	1096.38	24.48	0.29	257.206
tr|A0A498IWZ8|A0A498IWZ8_MALDO	Phosphoglycerate kinase OS=Malus domestica OX=3750 GN=DVH24_021907 PE=3 SV=1	78.55	0	27.88	STLKEAELK			cleaved V-S@N-term; missed K-E@4	-0.00100146	1017.57	509.792	1017.57	509.793	2	7	1.1.1.1889.3	13.4234	3800.88	2953.93	13.48	0.23	86.7214
tr|A0A498IWZ8|A0A498IWZ8_MALDO	Phosphoglycerate kinase OS=Malus domestica OX=3750 GN=DVH24_021907 PE=3 SV=1	78.55	0	99	SVSTLKEAELK	Carbamidomethyl(K)@6		missed K-E@6	-0.0012712	1260.69	631.353	1260.69	631.354	2	10	1.1.1.1890.3	13.4471	681.66	545.8	13.48	0.16	88.9704
tr|A0A498IWZ8|A0A498IWZ8_MALDO	Phosphoglycerate kinase OS=Malus domestica OX=3750 GN=DVH24_021907 PE=3 SV=1	78.55	0	98.31	SVSTLKEAELK			missed K-E@6	0.00256435	1203.67	402.232	1203.67	402.231	3	12	1.1.1.1888.2	13.386	57029.7	28611.3	13.5	0.19	3927.13
tr|A0A498IWZ8|A0A498IWZ8_MALDO	Phosphoglycerate kinase OS=Malus domestica OX=3750 GN=DVH24_021907 PE=3 SV=1	78.55	0	68.82	SVSTLKEAELK	Carbamyl(K)@6		missed K-E@6	0.00171069	1246.68	416.567	1246.68	416.566	3	10	1.1.1.2054.2	17.2679	7480.49	3875.95	17.38	0.24	1057.01
tr|A0A498IWZ8|A0A498IWZ8_MALDO	Phosphoglycerate kinase OS=Malus domestica OX=3750 GN=DVH24_021907 PE=3 SV=1	78.55	0	33.67	SVSTLKEAELK	Propionamide(K)@6		missed K-E@6	-0.00132537	1274.71	638.361	1274.71	638.361	2	9	1.1.1.2249.3	21.85	1132.55	1122.02	21.89	0.31	284.54
tr|A0A498IWZ8|A0A498IWZ8_MALDO	Phosphoglycerate kinase OS=Malus domestica OX=3750 GN=DVH24_021907 PE=3 SV=1	78.55	0	28.54	SVSTLKEAELK	Formyl(K)@6		missed K-E@6	-0.00299021	1231.66	616.839	1231.67	616.84	2	6	1.1.1.2066.9	17.5655	490.81	469.79	17.57	0.34	111.21
tr|A0A498IWZ8|A0A498IWZ8_MALDO	Phosphoglycerate kinase OS=Malus domestica OX=3750 GN=DVH24_021907 PE=3 SV=1	78.55	0	17.53	SVSTLKEAELK			missed K-E@6	0.00256435	1203.67	402.232	1203.67	402.231	3	6	1.1.1.1910.2	13.894	57029.7	1359.71	13.5	0.19	310.466
tr|A0A498IWZ8|A0A498IWZ8_MALDO	Phosphoglycerate kinase OS=Malus domestica OX=3750 GN=DVH24_021907 PE=3 SV=1	78.55	0	99	TLPGVLALDDA				-0.000439889	1083.58	542.798	1083.58	542.798	2	13	1.1.1.2434.4	26.2706	98323.2	2667.15	25.72	0.28	261.72
tr|A0A498IWZ8|A0A498IWZ8_MALDO	Phosphoglycerate kinase OS=Malus domestica OX=3750 GN=DVH24_021907 PE=3 SV=1	78.55	0	99	TLPGVLALDDA				-0.000439889	1083.58	542.798	1083.58	542.798	2	7	1.1.1.2455.8	26.7745	98323.2	650.7	25.72	0.28	88.2909
tr|A0A498IWZ8|A0A498IWZ8_MALDO	Phosphoglycerate kinase OS=Malus domestica OX=3750 GN=DVH24_021907 PE=3 SV=1	78.55	0	99	TLPGVLALDDA	Methyl(D)@9; Methyl(D)@10	Methyl(D)@399; Methyl(D)@400		-0.000696273	1111.61	556.813	1111.61	556.814	2	10	1.1.1.2539.2	28.8441	5169.39	4453.1	28.91	0.31	533.879
tr|A0A498IWZ8|A0A498IWZ8_MALDO	Phosphoglycerate kinase OS=Malus domestica OX=3750 GN=DVH24_021907 PE=3 SV=1	78.55	0	98.54	TLPGVLALDDA				0.000414609	1083.58	542.798	1083.58	542.798	2	6	1.1.1.2391.8	25.2489	2956.09	525.11	24.95	0.32	92.4889
tr|A0A498IWZ8|A0A498IWZ8_MALDO	Phosphoglycerate kinase OS=Malus domestica OX=3750 GN=DVH24_021907 PE=3 SV=1	78.55	0	84.48	TLPGVLALDDA				0.000414609	1083.58	542.798	1083.58	542.798	2	5	1.1.1.2368.6	24.7085	2956.09	558.46	24.95	0.32	96.6869
tr|A0A498IWZ8|A0A498IWZ8_MALDO	Phosphoglycerate kinase OS=Malus domestica OX=3750 GN=DVH24_021907 PE=3 SV=1	78.55	0	71.45	VAGFLMQK			cleaved S-V@N-term	2.51751e-06	892.484	447.249	892.484	447.249	2	7	1.1.1.2102.5	18.3907	1252.51	1193.96	18.36	0.28	322.879
tr|A0A498IWZ8|A0A498IWZ8_MALDO	Phosphoglycerate kinase OS=Malus domestica OX=3750 GN=DVH24_021907 PE=3 SV=1	78.55	0	99	VDLNVPLDDNSNITDDTR				0.00469002	2014.95	672.657	2014.94	672.655	3	21	1.1.1.2215.6	21.0497	98706.4	39915.2	21.2	0.23	1170.29
tr|A0A498IWZ8|A0A498IWZ8_MALDO	Phosphoglycerate kinase OS=Malus domestica OX=3750 GN=DVH24_021907 PE=3 SV=1	78.55	0	99	VDLNVPLDDNSNITDDTR				0.00469002	2014.95	672.657	2014.94	672.655	3	25	1.1.1.2216.10	21.0698	98706.4	45974.5	21.2	0.23	16750.4
tr|A0A498IWZ8|A0A498IWZ8_MALDO	Phosphoglycerate kinase OS=Malus domestica OX=3750 GN=DVH24_021907 PE=3 SV=1	78.55	0	98.77	VDLNVPLDDNSNITDDTR	Cation:Na(D)@8			0.00177458	2036.93	679.983	2036.93	679.983	3	12	1.1.1.2227.9	21.3327	4795.82	2746.37	21.18	0.26	583.736
tr|A0A498IWZ8|A0A498IWZ8_MALDO	Phosphoglycerate kinase OS=Malus domestica OX=3750 GN=DVH24_021907 PE=3 SV=1	78.55	0	98.77	VDLNVPLDDNSNITDDTR	Cation:Na(D)@9			0.00177458	2036.93	679.983	2036.93	679.983	3	12	1.1.1.2227.9	21.3327	4795.82	2746.37	21.18	0.26	583.736
tr|A0A498IWZ8|A0A498IWZ8_MALDO	Phosphoglycerate kinase OS=Malus domestica OX=3750 GN=DVH24_021907 PE=3 SV=1	78.55	0	95.36	VDLNVPLDDNSNITDDTR	Deamidated(N)@10			0.00990164	2015.94	672.987	2015.93	672.983	3	6	1.1.1.2263.12	22.1849	662.73	312	22.07	0.27	201.637
tr|A0A498IWZ8|A0A498IWZ8_MALDO	Phosphoglycerate kinase OS=Malus domestica OX=3750 GN=DVH24_021907 PE=3 SV=1	78.55	0	99	VNVLLLGGGMIF	Oxidation(M)@10		cleaved F-T@C-term	-0.00200306	1247.69	624.854	1247.69	624.855	2	16	1.1.1.2597.12	30.2649	7305.69	6390.26	30.28	0.05	1391.92
tr|A0A498IWZ8|A0A498IWZ8_MALDO	Phosphoglycerate kinase OS=Malus domestica OX=3750 GN=DVH24_021907 PE=3 SV=1	78.55	0	99	VSTKIGVIESLLAK	Carbamyl@N-term		missed K-I@4	-0.000761945	1499.89	500.971	1499.89	500.971	3	13	1.1.1.2593.3	30.1575	5382.1	5290.91	30.15	0.05	887.411
tr|A0A498IWZ8|A0A498IWZ8_MALDO	Phosphoglycerate kinase OS=Malus domestica OX=3750 GN=DVH24_021907 PE=3 SV=1	78.55	0	99	VSTKIGVIESLLAK	Carbamyl@N-term		missed K-I@4	-0.000761945	1499.89	500.971	1499.89	500.971	3	11	1.1.1.2594.4	30.1835	5382.1	4339.4	30.15	0.05	481.354
tr|A0A498IWZ8|A0A498IWZ8_MALDO	Phosphoglycerate kinase OS=Malus domestica OX=3750 GN=DVH24_021907 PE=3 SV=1	78.55	0	69.62	VSTKIGVIESLLAK	Carbamyl(K)@4		missed K-I@4	-0.000761945	1499.89	500.971	1499.89	500.971	3	12	1.1.1.2592.3	30.1325	5382.1	3906.13	30.15	0.05	454.267
tr|A0A498IWZ8|A0A498IWZ8_MALDO	Phosphoglycerate kinase OS=Malus domestica OX=3750 GN=DVH24_021907 PE=3 SV=1	78.55	0	69.62	VSTKIGVIESLLAK	Carbamyl(K)@4		missed K-I@4	-0.000761945	1499.89	500.971	1499.89	500.971	3	13	1.1.1.2593.3	30.1575	5382.1	5290.91	30.15	0.05	887.411
tr|A0A498IWZ8|A0A498IWZ8_MALDO	Phosphoglycerate kinase OS=Malus domestica OX=3750 GN=DVH24_021907 PE=3 SV=1	78.55	0	69.62	VSTKIGVIESLLAK	Carbamyl(K)@4		missed K-I@4	-0.000761945	1499.89	500.971	1499.89	500.971	3	11	1.1.1.2594.4	30.1835	5382.1	4339.4	30.15	0.05	481.354
tr|A0A498IWZ8|A0A498IWZ8_MALDO	Phosphoglycerate kinase OS=Malus domestica OX=3750 GN=DVH24_021907 PE=3 SV=1	78.55	0	99	VVPASAIPDGWMGLDIGPDSIK	Oxidation(M)@12			-0.00302471	2253.13	752.051	2253.14	752.052	3	16	1.1.1.2473.9	27.2234	31656.5	15101.6	27.38	0.32	929.421
tr|A0A498IWZ8|A0A498IWZ8_MALDO	Phosphoglycerate kinase OS=Malus domestica OX=3750 GN=DVH24_021907 PE=3 SV=1	78.55	0	99	VVPASAIPDGWMGLDIGPDSIK	Oxidation(M)@12			-0.00302471	2253.13	752.051	2253.14	752.052	3	28	1.1.1.2481.6	27.4255	31656.5	31170.3	27.38	0.32	7518.76
tr|A0A498IWZ8|A0A498IWZ8_MALDO	Phosphoglycerate kinase OS=Malus domestica OX=3750 GN=DVH24_021907 PE=3 SV=1	78.55	0	99	VVPASAIPDGWMGLDIGPDSIK				-0.000636052	2237.14	746.721	2237.14	746.721	3	16	1.1.1.2570.6	29.5985	24947	4788.73	29.33	0.35	325.327
tr|A0A498IWZ8|A0A498IWZ8_MALDO	Phosphoglycerate kinase OS=Malus domestica OX=3750 GN=DVH24_021907 PE=3 SV=1	78.55	0	99	VVPASAIPDGWMGLDIGPDSIK	Oxidation(M)@12			-0.000960249	2253.13	564.291	2253.14	564.291	4	10	1.1.1.2487.3	27.56	7083.59	2430.91	27.38	0.25	437.005
tr|A0A498IWZ8|A0A498IWZ8_MALDO	Phosphoglycerate kinase OS=Malus domestica OX=3750 GN=DVH24_021907 PE=3 SV=1	78.55	0	99	VVPASAIPDGWMGLDIGPDSIK				-0.00136848	2237.14	746.72	2237.14	746.721	3	9	1.1.1.2525.7	28.5101	1635.07	450.75	28.69	0.39	99.6159
tr|A0A498IWZ8|A0A498IWZ8_MALDO	Phosphoglycerate kinase OS=Malus domestica OX=3750 GN=DVH24_021907 PE=3 SV=1	78.55	0	99	VVPASAIPDGWMGLDIGPDSIK	Oxidation(M)@12			0.00228538	2253.14	752.053	2253.14	752.052	3	10	1.1.1.2557.4	29.2963	898.95	800	29.08	0.88	85.3284
tr|A0A498IWZ8|A0A498IWZ8_MALDO	Phosphoglycerate kinase OS=Malus domestica OX=3750 GN=DVH24_021907 PE=3 SV=1	78.55	0	99	VVPASAIPDGWMGLDIGPDSIK	Dioxidation(W)@11			-0.000652533	2269.13	757.384	2269.13	757.384	3	10	1.1.1.2439.12	26.395	4232.74	2834.49	26.28	0.33	295.823
tr|A0A498IWZ8|A0A498IWZ8_MALDO	Phosphoglycerate kinase OS=Malus domestica OX=3750 GN=DVH24_021907 PE=3 SV=1	78.55	0	99	VVPASAIPDGWMGLDIGPDSIK	Dioxidation(W)@11; Oxidation(M)@12			0.0013535	2285.13	762.716	2285.12	762.716	3	9	1.1.1.2365.18	24.6452	2072.43	2000.05	24.68	0.37	269.805
tr|A0A498IWZ8|A0A498IWZ8_MALDO	Phosphoglycerate kinase OS=Malus domestica OX=3750 GN=DVH24_021907 PE=3 SV=1	78.55	0	99	VVPASAIPDGWMGLDIGPDSIK	Oxidation(M)@12			-0.00302471	2253.13	752.051	2253.14	752.052	3	8	1.1.1.2494.8	27.7464	31656.5	1823.69	27.38	0.32	187.905
tr|A0A498IWZ8|A0A498IWZ8_MALDO	Phosphoglycerate kinase OS=Malus domestica OX=3750 GN=DVH24_021907 PE=3 SV=1	78.55	0	95.71	VVPASAIPDGWMGLDIGPDSIK	Oxidation(M)@12			-0.00302471	2253.13	752.051	2253.14	752.052	3	7	1.1.1.2452.15	26.7088	31656.5	870.98	27.38	0.32	155.939
tr|A0A498IWZ8|A0A498IWZ8_MALDO	Phosphoglycerate kinase OS=Malus domestica OX=3750 GN=DVH24_021907 PE=3 SV=1	78.55	0	94.17	VVPASAIPDGWMGLDIGPDSIK	Oxidation(W)@11; Oxidation(M)@12			-0.000652533	2269.13	757.384	2269.13	757.384	3	10	1.1.1.2439.12	26.395	4232.74	2834.49	26.28	0.33	295.823
tr|A0A498IWZ8|A0A498IWZ8_MALDO	Phosphoglycerate kinase OS=Malus domestica OX=3750 GN=DVH24_021907 PE=3 SV=1	78.55	0	94.17	VVPASAIPDGWMGLDIGPDSIK	Methyl(D)@9; Trp->Kynurenin(W)@11; Oxidation(M)@12	Methyl(D)@293		-0.0360053	2271.11	758.044	2271.15	758.056	3	9	1.1.1.2516.5	28.2888	640.22	596.42	28.3	0.3	96.5857
tr|A0A498IWZ8|A0A498IWZ8_MALDO	Phosphoglycerate kinase OS=Malus domestica OX=3750 GN=DVH24_021907 PE=3 SV=1	78.55	0	86.31	VVPASAIPDGWMGLDIGPDSIK	Dioxidation(M)@12	Dioxidation(M)@296		-0.000652533	2269.13	757.384	2269.13	757.384	3	10	1.1.1.2439.12	26.395	4232.74	2834.49	26.28	0.33	295.823
tr|A0A498IWZ8|A0A498IWZ8_MALDO	Phosphoglycerate kinase OS=Malus domestica OX=3750 GN=DVH24_021907 PE=3 SV=1	78.55	0	76.12	VVPASAIPDGWMGLDIGPDSIK	Methyl(D)@9; Trp->Hydroxykynurenin(W)@11	Methyl(D)@293		-0.0360053	2271.11	758.044	2271.15	758.056	3	9	1.1.1.2516.5	28.2888	640.22	596.42	28.3	0.3	96.5857
tr|A0A498IWZ8|A0A498IWZ8_MALDO	Phosphoglycerate kinase OS=Malus domestica OX=3750 GN=DVH24_021907 PE=3 SV=1	78.55	0	39.36	VVPASAIPDGWMGLDIGPDSIK	Oxidation(P)@8	Oxidation(P)@292		-0.00096025	2253.13	564.291	2253.14	564.291	4	10	1.1.1.2487.3	27.56	7083.59	2430.91	27.38	0.25	437.005
tr|A0A498IWZ8|A0A498IWZ8_MALDO	Phosphoglycerate kinase OS=Malus domestica OX=3750 GN=DVH24_021907 PE=3 SV=1	78.55	0	36.08	VVPASAIPDGWMGLDIGPDSIK	Oxidation(M)@12			-0.000960249	2253.13	564.291	2253.14	564.291	4	5	1.1.1.2492.3	27.6843	7083.59	495.79	27.38	0.25	197.001
tr|A0A498IWZ8|A0A498IWZ8_MALDO	Phosphoglycerate kinase OS=Malus domestica OX=3750 GN=DVH24_021907 PE=3 SV=1	78.55	0	34.55	VVPASAIPDGWMGLDIGPDSIK	Oxidation(W)@11			-0.00096025	2253.13	564.291	2253.14	564.291	4	10	1.1.1.2487.3	27.56	7083.59	2430.91	27.38	0.25	437.005
tr|A0A498IWZ8|A0A498IWZ8_MALDO	Phosphoglycerate kinase OS=Malus domestica OX=3750 GN=DVH24_021907 PE=3 SV=1	78.55	0	34.25	VVPASAIPDGWMGLDIGPDSIK	Oxidation(P)@8; Methyl(D)@9; Trp->Kynurenin(W)@11	Oxidation(P)@292; Methyl(D)@293		-0.0360053	2271.11	758.044	2271.15	758.056	3	9	1.1.1.2516.5	28.2888	640.22	596.42	28.3	0.3	96.5857
tr|A0A498IWZ8|A0A498IWZ8_MALDO	Phosphoglycerate kinase OS=Malus domestica OX=3750 GN=DVH24_021907 PE=3 SV=1	78.55	0	33.37	VVPASAIPDGWMGLDIGPDSIK	Pro->pyro-Glu(P)@8; Trp->Kynurenin(W)@11; Oxidation(M)@12			0.000380247	2271.11	758.044	2271.11	758.044	3	8	1.1.1.2516.5	28.2888	640.22	596.42	28.3	0.3	96.5857
tr|A0A498IWZ8|A0A498IWZ8_MALDO	Phosphoglycerate kinase OS=Malus domestica OX=3750 GN=DVH24_021907 PE=3 SV=1	78.55	0	26.19	VVPASAIPDGWMGLDIGPDSIK	Pro->pyro-Glu(P)@8; Trp->Hydroxykynurenin(W)@11			0.000380247	2271.11	758.044	2271.11	758.044	3	8	1.1.1.2516.5	28.2888	640.22	596.42	28.3	0.3	96.5857
tr|A0A498IWZ8|A0A498IWZ8_MALDO	Phosphoglycerate kinase OS=Malus domestica OX=3750 GN=DVH24_021907 PE=3 SV=1	78.55	0	99	YLKPSVAGFLMQK	Oxidation(M)@11			0.000855318	1496.81	499.943	1496.81	499.943	3	10	1.1.1.2253.5	21.9383	35053.9	3861.89	21.56	0.36	365.209
tr|A0A498IWZ8|A0A498IWZ8_MALDO	Phosphoglycerate kinase OS=Malus domestica OX=3750 GN=DVH24_021907 PE=3 SV=1	78.55	0	99	YLKPSVAGFLMQK				0.00172635	1480.81	494.612	1480.81	494.611	3	7	1.1.1.2286.11	22.7376	19751.5	880.36	23.09	0.39	289.495
tr|A0A498IWZ8|A0A498IWZ8_MALDO	Phosphoglycerate kinase OS=Malus domestica OX=3750 GN=DVH24_021907 PE=3 SV=1	78.55	0	99	YLKPSVAGFLMQK	Carbamyl(K)@3			-0.0010457	1523.82	762.915	1523.82	762.916	2	8	1.1.1.2439.13	26.3966	8489.12	1819.92	26.62	0.32	151.791
tr|A0A498IWZ8|A0A498IWZ8_MALDO	Phosphoglycerate kinase OS=Malus domestica OX=3750 GN=DVH24_021907 PE=3 SV=1	78.55	0	96.98	YLKPSVAGFLMQK	Oxidation(M)@11			0.00110718	1496.81	749.411	1496.81	749.41	2	9	1.1.1.2231.20	21.4314	11357.1	8301.31	21.56	0.38	453.317
tr|A0A498IWZ8|A0A498IWZ8_MALDO	Phosphoglycerate kinase OS=Malus domestica OX=3750 GN=DVH24_021907 PE=3 SV=1	78.55	0	94.17	YLKPSVAGFLMQK	Oxidation(M)@11			0.00317877	1496.81	499.944	1496.81	499.943	3	6	1.1.1.2279.5	22.5611	672.56	636.3	22.58	0.66	178.548
tr|A0A498IWZ8|A0A498IWZ8_MALDO	Phosphoglycerate kinase OS=Malus domestica OX=3750 GN=DVH24_021907 PE=3 SV=1	78.55	0	38.02	YLKPSVAGFLMQK	Carbamyl@N-term			-0.0010457	1523.82	762.915	1523.82	762.916	2	7	1.1.1.2439.13	26.3966	8489.12	1819.92	26.62	0.32	151.791
tr|A0A498IWZ8|A0A498IWZ8_MALDO	Phosphoglycerate kinase OS=Malus domestica OX=3750 GN=DVH24_021907 PE=3 SV=1	78.55	0	19.04	YLLGHGAK				9.64951e-05	857.476	429.745	857.476	429.745	2	5	1.1.1.1802.2	11.6103	2908.88	528.23	11.29	0.28	244.446
tr|A0A498IWZ8|A0A498IWZ8_MALDO	Phosphoglycerate kinase OS=Malus domestica OX=3750 GN=DVH24_021907 PE=3 SV=1	78.55	0	99	YSLKPLVPR	Carbamyl(K)@4			-0.000469143	1114.65	558.332	1114.65	558.332	2	11	1.1.1.2246.2	21.7799	26950	2582.56	21.51	0.26	380.532

## Sheet: Spot 9
Accession #	Name
tr|A0A498IWZ8|A0A498IWZ8_MALDO	Phosphoglycerate kinase OS=Malus domestica OX=3750 GN=DVH24_021907 PE=3 SV=1
Accessions	Names	%Cov(95)	Contrib	Conf	Sequence	Modifications	ProteinModifications	Cleavages	dMass	Obs MW	Obs m/z	Theor MW	Theor m/z	Theor z	Sc	Spectrum	Acq Time	Intensity (Peptide)	PrecursorIntensityAcquisition	Apex Time (Peptide)	Elution Peak Width (Peptide)	MS2Counts
tr|A0A498IWZ8|A0A498IWZ8_MALDO	Phosphoglycerate kinase OS=Malus domestica OX=3750 GN=DVH24_021907 PE=3 SV=1	74.06	2	99	AQGHSVGSSLVEEDKLDLAK			missed K-L@15	-0.00107137	2082.06	521.522	2082.06	521.522	4	20	1.1.1.2060.5	18.2336	17211	10597.7	18.05	0.31	1940.31
tr|A0A498IWZ8|A0A498IWZ8_MALDO	Phosphoglycerate kinase OS=Malus domestica OX=3750 GN=DVH24_021907 PE=3 SV=1	74.06	2	99	ELDYLVGAVSNPK	Glu->pyro-Glu@N-term			-0.00047262	1385.72	462.913	1385.72	462.914	3	13	1.1.1.2217.2	21.7687	4267.94	4133.99	21.79	0.23	121.224
tr|A0A498IWZ8|A0A498IWZ8_MALDO	Phosphoglycerate kinase OS=Malus domestica OX=3750 GN=DVH24_021907 PE=3 SV=1	74.06	2	99	FAAGTEAIAK				-0.000249758	977.518	489.766	977.518	489.766	2	17	1.1.1.1874.4	13.8854	268639	74646.9	13.69	0.23	6112.92
tr|A0A498IWZ8|A0A498IWZ8_MALDO	Phosphoglycerate kinase OS=Malus domestica OX=3750 GN=DVH24_021907 PE=3 SV=1	74.06	2	99	GVSILLPTDVVIADK				0.00179277	1538.89	770.454	1538.89	770.453	2	20	1.1.1.2430.10	26.8693	40729.9	7962.26	26.63	0.27	755.935
tr|A0A498IWZ8|A0A498IWZ8_MALDO	Phosphoglycerate kinase OS=Malus domestica OX=3750 GN=DVH24_021907 PE=3 SV=1	74.06	2	99	GVTTIIGGGDSVAAVEK				0.000659634	1572.84	525.286	1572.84	525.286	3	25	1.1.1.2116.4	19.4711	165962	76463.3	19.61	0.23	5195.01
tr|A0A498IWZ8|A0A498IWZ8_MALDO	Phosphoglycerate kinase OS=Malus domestica OX=3750 GN=DVH24_021907 PE=3 SV=1	74.06	2	99	IANDCIGEEVEK	Carbamidomethyl(C)@5			0.000186375	1375.63	688.822	1375.63	688.822	2	21	1.1.1.1913.7	14.7963	98584.9	51070.1	14.66	0.23	3361.83
tr|A0A498IWZ8|A0A498IWZ8_MALDO	Phosphoglycerate kinase OS=Malus domestica OX=3750 GN=DVH24_021907 PE=3 SV=1	74.06	2	99	IGVIESLLAK				-0.00036427	1041.64	521.829	1041.64	521.829	2	7	1.1.1.2444.5	27.2075	398.71	379.31	27.2	0.27	50.4203
tr|A0A498IWZ8|A0A498IWZ8_MALDO	Phosphoglycerate kinase OS=Malus domestica OX=3750 GN=DVH24_021907 PE=3 SV=1	74.06	2	99	LASLADVYVNDAFGTAHR				0.000805613	1918.95	480.746	1918.95	480.746	4	9	1.1.1.2335.3	24.5767	3140.35	1760.56	24.76	0.34	840.464
tr|A0A498IWZ8|A0A498IWZ8_MALDO	Phosphoglycerate kinase OS=Malus domestica OX=3750 GN=DVH24_021907 PE=3 SV=1	74.06	2	99	LSELLGLEVK				-0.00136578	1099.65	550.831	1099.65	550.832	2	8	1.1.1.2515.2	28.9579	429.75	373.46	28.93	0.32	54.2685
tr|A0A498IWZ8|A0A498IWZ8_MALDO	Phosphoglycerate kinase OS=Malus domestica OX=3750 GN=DVH24_021907 PE=3 SV=1	74.06	2	99	LVAQLPEGGVLLLENVR				0.00446631	1819.06	455.773	1819.06	455.771	4	15	1.1.1.2524.3	29.1828	1053.67	604.97	29.03	0.31	465.498
tr|A0A498IWZ8|A0A498IWZ8_MALDO	Phosphoglycerate kinase OS=Malus domestica OX=3750 GN=DVH24_021907 PE=3 SV=1	74.06	2	99	MSHISTGGGASLELLEGK				-5.18321e-05	1785.89	596.305	1785.89	596.305	3	19	1.1.1.2198.5	21.3251	17929.6	6374.16	21.01	0.35	629.824
tr|A0A498IWZ8|A0A498IWZ8_MALDO	Phosphoglycerate kinase OS=Malus domestica OX=3750 GN=DVH24_021907 PE=3 SV=1	74.06	2	99	PFAAIVGGSK			cleaved R-P@N-term	0.000471786	945.529	473.772	945.528	473.771	2	17	1.1.1.2013.4	17.1291	20811.1	13700.8	17.27	0.3	1593.71
tr|A0A498IWZ8|A0A498IWZ8_MALDO	Phosphoglycerate kinase OS=Malus domestica OX=3750 GN=DVH24_021907 PE=3 SV=1	74.06	2	99	RPFAAIVGGSK				0.000653415	1101.63	551.822	1101.63	551.822	2	15	1.1.1.1965.3	16.0102	9496.93	9464.26	16	0.44	628.926
tr|A0A498IWZ8|A0A498IWZ8_MALDO	Phosphoglycerate kinase OS=Malus domestica OX=3750 GN=DVH24_021907 PE=3 SV=1	74.06	2	99	SKGVSILLPTDVVIADK			missed K-G@2	0.000377129	1754.02	585.68	1754.02	585.68	3	8	1.1.1.2335.6	24.5817	5247.06	2367.56	24.43	0.26	311.915
tr|A0A498IWZ8|A0A498IWZ8_MALDO	Phosphoglycerate kinase OS=Malus domestica OX=3750 GN=DVH24_021907 PE=3 SV=1	74.06	2	99	TLPGVLALDDA				-0.000719834	1083.58	542.798	1083.58	542.798	2	13	1.1.1.2403.2	26.2009	81082.3	3291.29	25.7	0.3	271.334
tr|A0A498IWZ8|A0A498IWZ8_MALDO	Phosphoglycerate kinase OS=Malus domestica OX=3750 GN=DVH24_021907 PE=3 SV=1	74.06	2	99	VDLNVPLDDNSNITDDTR				-0.00122103	2014.94	672.655	2014.94	672.655	3	21	1.1.1.2194.5	21.2324	91534.6	82192.1	21.31	0.33	992.423
tr|A0A498IWZ8|A0A498IWZ8_MALDO	Phosphoglycerate kinase OS=Malus domestica OX=3750 GN=DVH24_021907 PE=3 SV=1	74.06	2	99	VVPASAIPDGWMGLDIGPDSIK	Oxidation(M)@12			-0.00139922	2253.13	564.291	2253.14	564.291	4	14	1.1.1.2457.3	27.5245	5793.42	2916.6	27.39	0.27	559.966
tr|A0A498IWZ8|A0A498IWZ8_MALDO	Phosphoglycerate kinase OS=Malus domestica OX=3750 GN=DVH24_021907 PE=3 SV=1	74.06	2	99	YLKPSVAGFLMQK	Oxidation(M)@11			0.00216844	1496.81	499.943	1496.81	499.943	3	18	1.1.1.2220.2	21.8406	24699.4	12539	21.65	0.33	840.819
tr|A0A498IWZ8|A0A498IWZ8_MALDO	Phosphoglycerate kinase OS=Malus domestica OX=3750 GN=DVH24_021907 PE=3 SV=1	74.06	2	99	YLLGHGAK				0.000887	857.477	429.746	857.476	429.745	2	11	1.1.1.1753.2	11.2711	6419.04	6360.59	11.3	0.29	855.147
tr|A0A498IWZ8|A0A498IWZ8_MALDO	Phosphoglycerate kinase OS=Malus domestica OX=3750 GN=DVH24_021907 PE=3 SV=1	74.06	1.79588	98.74	FAAGTEAIAKK			missed K-K@10	-0.00157058	1105.61	553.813	1105.61	553.814	2	8	1.1.1.1775.2	11.6962	6159.49	787.4	11.87	0.2	53.1311
tr|A0A498IWZ8|A0A498IWZ8_MALDO	Phosphoglycerate kinase OS=Malus domestica OX=3750 GN=DVH24_021907 PE=3 SV=1	74.06	1.60206	99	GVSILLPTDVVIADKF			cleaved F-A@C-term; missed K-F@15	0.00195346	1685.96	843.989	1685.96	843.987	2	10	1.1.1.2558.7	30.0077	2186.68	1057.36	30.06	0.07	136.817
tr|A0A498IWZ8|A0A498IWZ8_MALDO	Phosphoglycerate kinase OS=Malus domestica OX=3750 GN=DVH24_021907 PE=3 SV=1	74.06	1.4437	99	VNVLLLGGGMIF			cleaved F-T@C-term	-0.00223838	1231.7	616.856	1231.7	616.857	2	15	1.1.1.2578.3	30.4584	1498.68	1030.73	30.42	0.07	189.722
tr|A0A498IWZ8|A0A498IWZ8_MALDO	Phosphoglycerate kinase OS=Malus domestica OX=3750 GN=DVH24_021907 PE=3 SV=1	74.06	1.03152	99	VAQLPEGGVLLLENVR			cleaved L-V@N-term	-0.00066968	1705.97	853.993	1705.97	853.994	2	9	1.1.1.2447.9	27.2891	528.65	388.05	27.39	0.32	116.518
tr|A0A498IWZ8|A0A498IWZ8_MALDO	Phosphoglycerate kinase OS=Malus domestica OX=3750 GN=DVH24_021907 PE=3 SV=1	74.06	0.966576	99	EEEKNDPEFAK	Glu->pyro-Glu@N-term		missed K-N@4	-0.000647582	1316.59	659.301	1316.59	659.302	2	7	1.1.1.1804.8	12.2641	1403.24	614.55	12.41	0.26	57.7463
tr|A0A498IWZ8|A0A498IWZ8_MALDO	Phosphoglycerate kinase OS=Malus domestica OX=3750 GN=DVH24_021907 PE=3 SV=1	74.06	0.709965	95.69	FYKEEEKNDPEFAK	Deamidated(N)@8		missed K-E@3; missed K-N@7	0.0191952	1773.83	444.464	1773.81	444.46	4	10	1.1.1.1858.3	13.5144	605.84	409.09	13.43	0.23	423.817
tr|A0A498IWZ8|A0A498IWZ8_MALDO	Phosphoglycerate kinase OS=Malus domestica OX=3750 GN=DVH24_021907 PE=3 SV=1	74.06	0.69037	99	SVGSSLVEEDKLDLAK			cleaved H-S@N-term; missed K-L@11	-0.000333642	1688.88	845.449	1688.88	845.449	2	14	1.1.1.2119.3	19.5489	1922.22	849.15	19.7	0.27	120.562
tr|A0A498IWZ8|A0A498IWZ8_MALDO	Phosphoglycerate kinase OS=Malus domestica OX=3750 GN=DVH24_021907 PE=3 SV=1	74.06	0.655608	99	YLKPSVAGF			cleaved F-L@C-term	-0.000331114	980.533	491.274	980.533	491.274	2	11	1.1.1.2159.9	20.392	5241.13	1886.55	20.17	0.34	254.95
tr|A0A498IWZ8|A0A498IWZ8_MALDO	Phosphoglycerate kinase OS=Malus domestica OX=3750 GN=DVH24_021907 PE=3 SV=1	74.06	0.342944	99	LVGAVSNPK			cleaved Y-L@N-term	0.000987229	883.514	442.764	883.513	442.764	2	9	1.1.1.1714.2	10.8121	301.99	299.23	10.82	0.2	65.0254
tr|A0A498IWZ8|A0A498IWZ8_MALDO	Phosphoglycerate kinase OS=Malus domestica OX=3750 GN=DVH24_021907 PE=3 SV=1	74.06	0.138466	77.39	VILASHLGR			cleaved R-P@C-term	-0.00151324	964.58	483.297	964.582	483.298	2	8	1.1.1.1923.7	15.028	12416	1144.91	14.75	0.23	211.144
tr|A0A498IWZ8|A0A498IWZ8_MALDO	Phosphoglycerate kinase OS=Malus domestica OX=3750 GN=DVH24_021907 PE=3 SV=1	74.06	0.0819697	99	YSLKPLVPR	Carbamyl(K)@4			0.000432916	1114.65	558.332	1114.65	558.332	2	10	1.1.1.2200.2	21.3792	12728.6	1939.88	21.6	0.26	244.34
tr|A0A498IWZ8|A0A498IWZ8_MALDO	Phosphoglycerate kinase OS=Malus domestica OX=3750 GN=DVH24_021907 PE=3 SV=1	74.06	0.0357404	98.87	SVSTLKEAELK	Carbamyl(K)@6		missed K-E@6	0.00105037	1246.68	624.346	1246.68	624.346	2	10	1.1.1.2023.9	17.3554	7804.82	1608.48	17.53	0.24	247.446
tr|A0A498IWZ8|A0A498IWZ8_MALDO	Phosphoglycerate kinase OS=Malus domestica OX=3750 GN=DVH24_021907 PE=3 SV=1	74.06	0.0222764	99	AQGHSVGSSL	Deamidated(Q)@2		cleaved L-V@C-term	-0.000223377	942.44	472.228	942.441	472.228	2	9	1.1.1.1761.2	11.3739	251.88	242.62	11.38	0.3	61.0273
tr|A0A498IWZ8|A0A498IWZ8_MALDO	Phosphoglycerate kinase OS=Malus domestica OX=3750 GN=DVH24_021907 PE=3 SV=1	74.06	0.0172766	31.58	EEEKNDPEFAKK	Glu->pyro-Glu@N-term		missed K-N@4; missed K-K@11	-0.000287067	1444.68	482.568	1444.68	482.568	3	5	1.1.1.1689.2	10.4928	880.61	419.52	10.66	0.3	34.8897
tr|A0A498IWZ8|A0A498IWZ8_MALDO	Phosphoglycerate kinase OS=Malus domestica OX=3750 GN=DVH24_021907 PE=3 SV=1	74.06	0.0127808	97	VSTKIGVIESLLAK	Carbamyl(K)@4		missed K-I@4	0.000180774	1499.89	750.953	1499.89	750.953	2	7	1.1.1.2563.11	30.124	7125.22	3830.87	30.16	0.05	224.726
tr|A0A498IWZ8|A0A498IWZ8_MALDO	Phosphoglycerate kinase OS=Malus domestica OX=3750 GN=DVH24_021907 PE=3 SV=1	74.06	0.00966115	92.03	FAAIVGGSK			cleaved P-F@N-term	0.000951209	848.477	425.245	848.476	425.245	2	9	1.1.1.1903.2	14.5461	4266.29	705.29	14.78	0.28	486.851
tr|A0A498IWZ8|A0A498IWZ8_MALDO	Phosphoglycerate kinase OS=Malus domestica OX=3750 GN=DVH24_021907 PE=3 SV=1	74.06	0.00612308	87.87	GVSILLPTDVVIA			cleaved A-D@C-term	-0.00336395	1295.77	648.891	1295.77	648.892	2	6	1.1.1.2562.4	30.0956	494.8	491.1	30.11	0.12	134.349
tr|A0A498IWZ8|A0A498IWZ8_MALDO	Phosphoglycerate kinase OS=Malus domestica OX=3750 GN=DVH24_021907 PE=3 SV=1	74.06	0.00130485	99	GVTTIIGGGD			cleaved D-S@C-term	-0.0005641	888.455	445.235	888.455	445.235	2	12	1.1.1.2053.3	18.0602	970.34	955.57	18.05	0.33	510.021
tr|A0A498IWZ8|A0A498IWZ8_MALDO	Phosphoglycerate kinase OS=Malus domestica OX=3750 GN=DVH24_021907 PE=3 SV=1	74.06	0.000869447	19.64	IRAAVPTIK	Carbamidomethyl@N-term		missed R-A@2	-0.0118537	1024.63	513.321	1024.64	513.327	2	4	1.1.1.1824.5	12.7234	580.39	436.31	12.8	0.19	57.2481
tr|A0A498IWZ8|A0A498IWZ8_MALDO	Phosphoglycerate kinase OS=Malus domestica OX=3750 GN=DVH24_021907 PE=3 SV=1	74.06	0.000869447	97.85	YLVGAVSNPK			cleaved D-Y@N-term	-0.00174228	1046.57	524.294	1046.58	524.295	2	9	1.1.1.1936.7	15.3387	2081.92	1089.09	15.23	0.24	214.143
tr|A0A498IWZ8|A0A498IWZ8_MALDO	Phosphoglycerate kinase OS=Malus domestica OX=3750 GN=DVH24_021907 PE=3 SV=1	74.06	0.000434506	98.6	AQGHSVGSSLVEED			cleaved D-K@C-term	0.00230069	1413.64	707.827	1413.64	707.826	2	9	1.1.1.1887.5	14.1786	468.59	421.1	14.21	0.3	44.804
tr|A0A498IWZ8|A0A498IWZ8_MALDO	Phosphoglycerate kinase OS=Malus domestica OX=3750 GN=DVH24_021907 PE=3 SV=1	74.06	0.000434506	60.03	GVTTIIGGGDSVAAVEKA			cleaved A-G@C-term; missed K-A@17	0.00182113	1643.87	822.945	1643.87	822.944	2	7	1.1.1.2165.16	20.5463	1645.25	515.76	20.72	0.27	84.2232
tr|A0A498IWZ8|A0A498IWZ8_MALDO	Phosphoglycerate kinase OS=Malus domestica OX=3750 GN=DVH24_021907 PE=3 SV=1	74.06	0	98.87	AQGHSVGSSL			cleaved L-V@C-term	0.000757094	941.457	471.736	941.457	471.736	2	8	1.1.1.1717.2	10.8653	584.27	374.43	10.97	0.25	44.9849
tr|A0A498IWZ8|A0A498IWZ8_MALDO	Phosphoglycerate kinase OS=Malus domestica OX=3750 GN=DVH24_021907 PE=3 SV=1	74.06	0	20.37	AQGHSVGSSLVEEDK	Lys-loss@C-term			0.00230069	1413.64	707.827	1413.64	707.826	2	9	1.1.1.1887.5	14.1786	468.59	421.1	14.21	0.3	44.804
tr|A0A498IWZ8|A0A498IWZ8_MALDO	Phosphoglycerate kinase OS=Malus domestica OX=3750 GN=DVH24_021907 PE=3 SV=1	74.06	0	99	AQGHSVGSSLVEEDKLDLAK			missed K-L@15	-0.000140545	2082.06	695.027	2082.06	695.027	3	14	1.1.1.2065.5	18.3354	6983.21	2640.85	18.08	0.31	158.3
tr|A0A498IWZ8|A0A498IWZ8_MALDO	Phosphoglycerate kinase OS=Malus domestica OX=3750 GN=DVH24_021907 PE=3 SV=1	74.06	0	99	ELDYLVGAVSNPK				0.00333223	1403.73	702.874	1403.73	702.872	2	21	1.1.1.2224.2	21.9318	470055	246636	21.79	0.23	17455.4
tr|A0A498IWZ8|A0A498IWZ8_MALDO	Phosphoglycerate kinase OS=Malus domestica OX=3750 GN=DVH24_021907 PE=3 SV=1	74.06	0	99	ELDYLVGAVSNPK				0.00128346	1403.73	468.918	1403.73	468.917	3	14	1.1.1.2227.2	21.9998	65715.5	21344.2	21.79	0.26	1190.37
tr|A0A498IWZ8|A0A498IWZ8_MALDO	Phosphoglycerate kinase OS=Malus domestica OX=3750 GN=DVH24_021907 PE=3 SV=1	74.06	0	99	ELDYLVGAVSNPK				0.00241102	1403.73	702.873	1403.73	702.872	2	13	1.1.1.2245.8	22.4403	50.6334	50.6334			194.771
tr|A0A498IWZ8|A0A498IWZ8_MALDO	Phosphoglycerate kinase OS=Malus domestica OX=3750 GN=DVH24_021907 PE=3 SV=1	74.06	0	99	ELDYLVGAVSNPK	Glu->pyro-Glu@N-term; Deamidated(N)@11			0.0172166	1386.72	694.367	1386.7	694.359	2	10	1.1.1.2469.5	27.8234	2661.65	901.87	27.59	0.34	228.586
tr|A0A498IWZ8|A0A498IWZ8_MALDO	Phosphoglycerate kinase OS=Malus domestica OX=3750 GN=DVH24_021907 PE=3 SV=1	74.06	0	99	ELDYLVGAVSNPK	Glu->pyro-Glu@N-term; Deamidated(N)@11			0.0172166	1386.72	694.367	1386.7	694.359	2	7	1.1.1.2448.11	27.312	2661.65	431.82	27.59	0.34	122.553
tr|A0A498IWZ8|A0A498IWZ8_MALDO	Phosphoglycerate kinase OS=Malus domestica OX=3750 GN=DVH24_021907 PE=3 SV=1	74.06	0	98.27	ELDYLVGAVSNPK				0.00333223	1403.73	702.874	1403.73	702.872	2	8	1.1.1.2202.10	21.4198	470055	601.9	21.79	0.23	135.399
tr|A0A498IWZ8|A0A498IWZ8_MALDO	Phosphoglycerate kinase OS=Malus domestica OX=3750 GN=DVH24_021907 PE=3 SV=1	74.06	0	49.08	ELDYLVGAVSNPK	Glu->pyro-Glu@N-term; Oxidation(D)@3; Amino(Y)@4	Oxidation(D)@181		0.0380306	1416.76	709.389	1416.72	709.37	2	10	1.1.1.2220.4	21.8523	3098.65	259.68	21.53	0.24	137.504
tr|A0A498IWZ8|A0A498IWZ8_MALDO	Phosphoglycerate kinase OS=Malus domestica OX=3750 GN=DVH24_021907 PE=3 SV=1	74.06	0	98.27	FAAGTEAIAK				-0.000249758	977.518	489.766	977.518	489.766	2	10	1.1.1.1896.5	14.3889	268639	1404.06	13.69	0.23	179.709
tr|A0A498IWZ8|A0A498IWZ8_MALDO	Phosphoglycerate kinase OS=Malus domestica OX=3750 GN=DVH24_021907 PE=3 SV=1	74.06	0	93.09	FAAGTEAIAK	Methyl(T)@5; Methyl(E)@6	Methyl(T)@336; Methyl(E)@337		-3.40464e-05	1005.55	503.782	1005.55	503.782	2	12	1.1.1.2005.6	16.9399	19870.3	2414.44	17.13	0.23	257.722
tr|A0A498IWZ8|A0A498IWZ8_MALDO	Phosphoglycerate kinase OS=Malus domestica OX=3750 GN=DVH24_021907 PE=3 SV=1	74.06	0	74.06	FAAGTEAIAK				-0.00061597	977.518	489.766	977.518	489.766	2	8	1.1.1.1918.5	14.9034	689.24	640.72	15.06	0.62	96.5674
tr|A0A498IWZ8|A0A498IWZ8_MALDO	Phosphoglycerate kinase OS=Malus domestica OX=3750 GN=DVH24_021907 PE=3 SV=1	74.06	0	19.28	FAAGTEAIAK				-0.000249758	977.518	489.766	977.518	489.766	2	5	1.1.1.1852.7	13.3797	268639	399.91	13.69	0.23	43.511
tr|A0A498IWZ8|A0A498IWZ8_MALDO	Phosphoglycerate kinase OS=Malus domestica OX=3750 GN=DVH24_021907 PE=3 SV=1	74.06	0	99	GVSILLPTDVVIADK				0.00179277	1538.89	770.454	1538.89	770.453	2	7	1.1.1.2409.11	26.3559	40729.9	1204.79	26.63	0.27	197.419
tr|A0A498IWZ8|A0A498IWZ8_MALDO	Phosphoglycerate kinase OS=Malus domestica OX=3750 GN=DVH24_021907 PE=3 SV=1	74.06	0	98.14	GVSILLPTDVVIADK	Delta:H(4)C(2)(K)@15			-0.00175644	1566.92	784.468	1566.92	784.469	2	9	1.1.1.2519.6	29.0633	1153.86	444.04	29.22	0.24	138.578
tr|A0A498IWZ8|A0A498IWZ8_MALDO	Phosphoglycerate kinase OS=Malus domestica OX=3750 GN=DVH24_021907 PE=3 SV=1	74.06	0	77.22	GVSILLPTDVVIADK	Dimethyl(K)@15	Dimethyl(K)@276		-0.00175644	1566.92	784.468	1566.92	784.469	2	9	1.1.1.2519.6	29.0633	1153.86	444.04	29.22	0.24	138.578
tr|A0A498IWZ8|A0A498IWZ8_MALDO	Phosphoglycerate kinase OS=Malus domestica OX=3750 GN=DVH24_021907 PE=3 SV=1	74.06	0	99	GVTTIIGGGDSVAAVEK				0.0024583	1572.84	787.427	1572.84	787.425	2	17	1.1.1.2106.2	19.2516	536310	1865.49	19.61	0.23	175.123
tr|A0A498IWZ8|A0A498IWZ8_MALDO	Phosphoglycerate kinase OS=Malus domestica OX=3750 GN=DVH24_021907 PE=3 SV=1	74.06	0	99	GVTTIIGGGDSVAAVEK				0.0024583	1572.84	787.427	1572.84	787.425	2	30	1.1.1.2129.3	19.7699	536310	175393	19.61	0.23	12823.8
tr|A0A498IWZ8|A0A498IWZ8_MALDO	Phosphoglycerate kinase OS=Malus domestica OX=3750 GN=DVH24_021907 PE=3 SV=1	74.06	0	99	GVTTIIGGGDSVAAVEK				0.0024583	1572.84	787.427	1572.84	787.425	2	23	1.1.1.2154.5	20.2845	536310	3087.06	19.61	0.23	392.439
tr|A0A498IWZ8|A0A498IWZ8_MALDO	Phosphoglycerate kinase OS=Malus domestica OX=3750 GN=DVH24_021907 PE=3 SV=1	74.06	0	99	GVTTIIGGGDSVAAVEK	Delta:H(4)C(2)(K)@17			-0.000620446	1600.87	534.63	1600.87	534.63	3	13	1.1.1.2257.9	22.7249	12773.6	3663.03	22.89	0.22	626.485
tr|A0A498IWZ8|A0A498IWZ8_MALDO	Phosphoglycerate kinase OS=Malus domestica OX=3750 GN=DVH24_021907 PE=3 SV=1	74.06	0	99	GVTTIIGGGDSVAAVEK	Delta:H(4)C(2)(K)@17			0.00125093	1600.87	801.442	1600.87	801.441	2	18	1.1.1.2273.12	23.1179	36586	3944.19	22.89	0.22	337.753
tr|A0A498IWZ8|A0A498IWZ8_MALDO	Phosphoglycerate kinase OS=Malus domestica OX=3750 GN=DVH24_021907 PE=3 SV=1	74.06	0	99	GVTTIIGGGDSVAAVEK				0.0024583	1572.84	787.427	1572.84	787.425	2	11	1.1.1.2175.12	20.7851	536310	1148.01	19.61	0.23	159.787
tr|A0A498IWZ8|A0A498IWZ8_MALDO	Phosphoglycerate kinase OS=Malus domestica OX=3750 GN=DVH24_021907 PE=3 SV=1	74.06	0	99	GVTTIIGGGDSVAAVEK	Dehydrated(S)@11	Dehydrated(S)@360		-0.000460824	1554.82	778.42	1554.83	778.42	2	15	1.1.1.2156.4	20.3314	1037.16	582.02	20.43	0.21	133.456
tr|A0A498IWZ8|A0A498IWZ8_MALDO	Phosphoglycerate kinase OS=Malus domestica OX=3750 GN=DVH24_021907 PE=3 SV=1	74.06	0	95.17	GVTTIIGGGDSVAAVEK	Delta:H(4)C(2)(K)@17			0.00125093	1600.87	801.442	1600.87	801.441	2	8	1.1.1.2252.14	22.6115	36586	1009.57	22.89	0.22	238.8
tr|A0A498IWZ8|A0A498IWZ8_MALDO	Phosphoglycerate kinase OS=Malus domestica OX=3750 GN=DVH24_021907 PE=3 SV=1	74.06	0	87.87	GVTTIIGGGDSVAAVEK	Dimethyl(K)@17	Dimethyl(K)@366		-0.000620446	1600.87	534.63	1600.87	534.63	3	13	1.1.1.2257.9	22.7249	12773.6	3663.03	22.89	0.22	626.485
tr|A0A498IWZ8|A0A498IWZ8_MALDO	Phosphoglycerate kinase OS=Malus domestica OX=3750 GN=DVH24_021907 PE=3 SV=1	74.06	0	87.87	GVTTIIGGGDSVAAVEK	Dimethyl(K)@17	Dimethyl(K)@366		0.00125093	1600.87	801.442	1600.87	801.441	2	18	1.1.1.2273.12	23.1179	36586	3944.19	22.89	0.22	337.753
tr|A0A498IWZ8|A0A498IWZ8_MALDO	Phosphoglycerate kinase OS=Malus domestica OX=3750 GN=DVH24_021907 PE=3 SV=1	74.06	0	49.83	GVTTIIGGGDSVAAVEK	Dehydrated(D)@10			-0.000460824	1554.82	778.42	1554.83	778.42	2	15	1.1.1.2156.4	20.3314	1037.16	582.02	20.43	0.21	133.456
tr|A0A498IWZ8|A0A498IWZ8_MALDO	Phosphoglycerate kinase OS=Malus domestica OX=3750 GN=DVH24_021907 PE=3 SV=1	74.06	0	49.45	GVTTIIGGGDSVAAVEK				0.00721906	1572.84	787.429	1572.84	787.425	2	7	1.1.1.2205.18	21.4945	778.75	691.76	21.48	0.54	176.249
tr|A0A498IWZ8|A0A498IWZ8_MALDO	Phosphoglycerate kinase OS=Malus domestica OX=3750 GN=DVH24_021907 PE=3 SV=1	74.06	0	49.08	GVTTIIGGGDSVAAVEK	Carboxy(D)@10	Carboxy(D)@359		-0.0235845	1616.8	539.941	1616.83	539.949	3	9	1.1.1.2120.2	19.5699	995.62	927.81	19.58	0.21	269.834
tr|A0A498IWZ8|A0A498IWZ8_MALDO	Phosphoglycerate kinase OS=Malus domestica OX=3750 GN=DVH24_021907 PE=3 SV=1	74.06	0	48.05	GVTTIIGGGDSVAAVEK	Formyl(K)@17			-0.00482025	1600.83	801.42	1600.83	801.423	2	9	1.1.1.2155.5	20.3078	576.04	485.09	20.34	0.24	118.369
tr|A0A498IWZ8|A0A498IWZ8_MALDO	Phosphoglycerate kinase OS=Malus domestica OX=3750 GN=DVH24_021907 PE=3 SV=1	74.06	0	28.76	GVTTIIGGGDSVAAVEK	Propionamide(K)@17			0.00182113	1643.87	822.945	1643.87	822.944	2	7	1.1.1.2165.16	20.5463	1645.25	515.76	20.72	0.27	84.2232
tr|A0A498IWZ8|A0A498IWZ8_MALDO	Phosphoglycerate kinase OS=Malus domestica OX=3750 GN=DVH24_021907 PE=3 SV=1	74.06	0	99	IANDCIGEEVEK	Deamidated(N)@3; Carbamidomethyl(C)@5			0.000548821	1376.61	689.314	1376.61	689.314	2	19	1.1.1.1935.6	15.3199	4474.82	3870.57	15.4	0.26	347.816
tr|A0A498IWZ8|A0A498IWZ8_MALDO	Phosphoglycerate kinase OS=Malus domestica OX=3750 GN=DVH24_021907 PE=3 SV=1	74.06	0	99	IANDCIGEEVEK	Carbamidomethyl(C)@5			0.000186375	1375.63	688.822	1375.63	688.822	2	9	1.1.1.1891.8	14.2751	98584.9	366.89	14.66	0.23	42.724
tr|A0A498IWZ8|A0A498IWZ8_MALDO	Phosphoglycerate kinase OS=Malus domestica OX=3750 GN=DVH24_021907 PE=3 SV=1	74.06	0	99	IANDCIGEEVEK	Carbamidomethyl(C)@5; Methyl(I)@6	Methyl(I)@99		0.000570588	1389.65	695.83	1389.64	695.83	2	17	1.1.1.1928.8	15.1529	19294.6	5049.98	14.97	0.21	309.297
tr|A0A498IWZ8|A0A498IWZ8_MALDO	Phosphoglycerate kinase OS=Malus domestica OX=3750 GN=DVH24_021907 PE=3 SV=1	74.06	0	99	IANDCIGEEVEK	Carbamidomethyl(C)@5; Delta:H(4)C(2)(K)@12			0.0015652	1403.66	702.838	1403.66	702.837	2	19	1.1.1.2046.13	17.9072	16460.2	16378.9	17.91	0.29	1143.92
tr|A0A498IWZ8|A0A498IWZ8_MALDO	Phosphoglycerate kinase OS=Malus domestica OX=3750 GN=DVH24_021907 PE=3 SV=1	74.06	0	99	IANDCIGEEVEK	Carbamidomethyl(C)@5; Delta:H(4)C(2)(K)@12			0.000954849	1403.66	702.838	1403.66	702.837	2	13	1.1.1.2003.6	16.8987	7389.87	1378.4	17.09	0.23	130.32
tr|A0A498IWZ8|A0A498IWZ8_MALDO	Phosphoglycerate kinase OS=Malus domestica OX=3750 GN=DVH24_021907 PE=3 SV=1	74.06	0	99	IANDCIGEEVEK	Methyl(D)@4; Carbamidomethyl(C)@5; Delta:H(4)C(2)(K)@12	Methyl(D)@97		0.00133916	1417.68	709.846	1417.68	709.845	2	12	1.1.1.2066.5	18.3587	3372.09	1830.63	18.17	0.38	183.488
tr|A0A498IWZ8|A0A498IWZ8_MALDO	Phosphoglycerate kinase OS=Malus domestica OX=3750 GN=DVH24_021907 PE=3 SV=1	74.06	0	99	IANDCIGEEVEK	Deamidated(N)@3; Carbamidomethyl(C)@5; Delta:H(4)C(2)(K)@12			-0.000391688	1404.64	703.329	1404.64	703.329	2	10	1.1.1.2069.8	18.4295	1509.8	1104.32	18.65	0.45	162.717
tr|A0A498IWZ8|A0A498IWZ8_MALDO	Phosphoglycerate kinase OS=Malus domestica OX=3750 GN=DVH24_021907 PE=3 SV=1	74.06	0	52.91	IANDCIGEEVEK	Carbamidomethyl(C)@5			0.000613761	1375.63	459.55	1375.63	459.55	3	6	1.1.1.1903.8	14.5553	7406.14	3403.6	14.66	0.21	148.693
tr|A0A498IWZ8|A0A498IWZ8_MALDO	Phosphoglycerate kinase OS=Malus domestica OX=3750 GN=DVH24_021907 PE=3 SV=1	74.06	0	49.08	IANDCIGEEVEK	Methyl(D)@4; Carbamidomethyl(C)@5	Methyl(D)@97		0.00163673	1389.65	464.223	1389.64	464.222	3	9	1.1.1.1923.5	15.023	2070.06	1793.4	14.99	0.24	611.722
tr|A0A498IWZ8|A0A498IWZ8_MALDO	Phosphoglycerate kinase OS=Malus domestica OX=3750 GN=DVH24_021907 PE=3 SV=1	74.06	0	45.36	IANDCIGEEVEK	Carbamidomethyl(C)@5			0.000613761	1375.63	459.55	1375.63	459.55	3	7	1.1.1.1910.2	14.7134	7406.14	6713.16	14.66	0.21	278.592
tr|A0A498IWZ8|A0A498IWZ8_MALDO	Phosphoglycerate kinase OS=Malus domestica OX=3750 GN=DVH24_021907 PE=3 SV=1	74.06	0	40.02	IANDCIGEEVEK	Carbamidomethyl(C)@5; Dimethyl(K)@12	Dimethyl(K)@105		0.000954849	1403.66	702.838	1403.66	702.837	2	13	1.1.1.2003.6	16.8987	7389.87	1378.4	17.09	0.23	130.32
tr|A0A498IWZ8|A0A498IWZ8_MALDO	Phosphoglycerate kinase OS=Malus domestica OX=3750 GN=DVH24_021907 PE=3 SV=1	74.06	0	40.02	IANDCIGEEVEK	Carbamidomethyl(C)@5; Dimethyl(K)@12	Dimethyl(K)@105		0.0015652	1403.66	702.838	1403.66	702.837	2	19	1.1.1.2046.13	17.9072	16460.2	16378.9	17.91	0.29	1143.92
tr|A0A498IWZ8|A0A498IWZ8_MALDO	Phosphoglycerate kinase OS=Malus domestica OX=3750 GN=DVH24_021907 PE=3 SV=1	74.06	0	40.02	IANDCIGEEVEK	Methyl(D)@4; Carbamidomethyl(C)@5; Dimethyl(K)@12	Methyl(D)@97; Dimethyl(K)@105		0.00133916	1417.68	709.846	1417.68	709.845	2	12	1.1.1.2066.5	18.3587	3372.09	1830.63	18.17	0.38	183.488
tr|A0A498IWZ8|A0A498IWZ8_MALDO	Phosphoglycerate kinase OS=Malus domestica OX=3750 GN=DVH24_021907 PE=3 SV=1	74.06	0	40.02	IANDCIGEEVEK	Deamidated(N)@3; Carbamidomethyl(C)@5; Dimethyl(K)@12	Dimethyl(K)@105		-0.000391688	1404.64	703.329	1404.64	703.329	2	10	1.1.1.2069.8	18.4295	1509.8	1104.32	18.65	0.45	162.717
tr|A0A498IWZ8|A0A498IWZ8_MALDO	Phosphoglycerate kinase OS=Malus domestica OX=3750 GN=DVH24_021907 PE=3 SV=1	74.06	0	38.92	IANDCIGEEVEK	Deamidated(N)@3; Carbamidomethyl(C)@5			0.00244091	1376.62	459.879	1376.61	459.878	3	7	1.1.1.1924.4	15.0453	412.32	358.74	15.11	0.26	638.41
tr|A0A498IWZ8|A0A498IWZ8_MALDO	Phosphoglycerate kinase OS=Malus domestica OX=3750 GN=DVH24_021907 PE=3 SV=1	74.06	0	34.45	IANDCIGEEVEK	Methyl(N)@3; Carbamidomethyl(C)@5	Methyl(N)@96		0.00163673	1389.65	464.223	1389.64	464.222	3	8	1.1.1.1923.5	15.023	2070.06	1793.4	14.99	0.24	611.722
tr|A0A498IWZ8|A0A498IWZ8_MALDO	Phosphoglycerate kinase OS=Malus domestica OX=3750 GN=DVH24_021907 PE=3 SV=1	74.06	0	26.55	IANDCIGEEVEK	Carbamidomethyl(C)@5; Methyl(E)@9; Methyl(E)@11	Methyl(E)@102; Methyl(E)@104		0.000954849	1403.66	702.838	1403.66	702.837	2	15	1.1.1.2003.6	16.8987	7389.87	1378.4	17.09	0.23	130.32
tr|A0A498IWZ8|A0A498IWZ8_MALDO	Phosphoglycerate kinase OS=Malus domestica OX=3750 GN=DVH24_021907 PE=3 SV=1	74.06	0	26.55	IANDCIGEEVEK	Carbamidomethyl(C)@5; Methyl(E)@8; Methyl(E)@11	Methyl(E)@101; Methyl(E)@104		0.000954849	1403.66	702.838	1403.66	702.837	2	14	1.1.1.2003.6	16.8987	7389.87	1378.4	17.09	0.23	130.32
tr|A0A498IWZ8|A0A498IWZ8_MALDO	Phosphoglycerate kinase OS=Malus domestica OX=3750 GN=DVH24_021907 PE=3 SV=1	74.06	0	26.55	IANDCIGEEVEK	Carbamidomethyl(C)@5; Methyl(E)@8; Methyl(E)@9	Methyl(E)@101; Methyl(E)@102		0.000954849	1403.66	702.838	1403.66	702.837	2	14	1.1.1.2003.6	16.8987	7389.87	1378.4	17.09	0.23	130.32
tr|A0A498IWZ8|A0A498IWZ8_MALDO	Phosphoglycerate kinase OS=Malus domestica OX=3750 GN=DVH24_021907 PE=3 SV=1	74.06	0	25.06	IANDCIGEEVEK	Carbamidomethyl(C)@5; Methyl(I)@6; Delta:H(4)C(2)(K)@12	Methyl(I)@99		0.00133916	1417.68	709.846	1417.68	709.845	2	12	1.1.1.2066.5	18.3587	3372.09	1830.63	18.17	0.38	183.488
tr|A0A498IWZ8|A0A498IWZ8_MALDO	Phosphoglycerate kinase OS=Malus domestica OX=3750 GN=DVH24_021907 PE=3 SV=1	74.06	0	20	IANDCIGEEVEK	Carbamidomethyl(C)@5; Methyl(I)@6; Dimethyl(K)@12	Methyl(I)@99; Dimethyl(K)@105		0.00133916	1417.68	709.846	1417.68	709.845	2	12	1.1.1.2066.5	18.3587	3372.09	1830.63	18.17	0.38	183.488
tr|A0A498IWZ8|A0A498IWZ8_MALDO	Phosphoglycerate kinase OS=Malus domestica OX=3750 GN=DVH24_021907 PE=3 SV=1	74.06	0	16.92	IANDCIGEEVEK	Carbamidomethyl(C)@5; Methyl(E)@9; Methyl(K)@12	Methyl(E)@102; Methyl(K)@105		0.000954849	1403.66	702.838	1403.66	702.837	2	14	1.1.1.2003.6	16.8987	7389.87	1378.4	17.09	0.23	130.32
tr|A0A498IWZ8|A0A498IWZ8_MALDO	Phosphoglycerate kinase OS=Malus domestica OX=3750 GN=DVH24_021907 PE=3 SV=1	74.06	0	99	IGVIESLLAK				-0.0002422	1041.64	521.829	1041.64	521.829	2	17	1.1.1.2377.3	25.59	172313	164761	25.56	0.38	10533.2
tr|A0A498IWZ8|A0A498IWZ8_MALDO	Phosphoglycerate kinase OS=Malus domestica OX=3750 GN=DVH24_021907 PE=3 SV=1	74.06	0	99	IGVIESLLAK				-0.0002422	1041.64	521.829	1041.64	521.829	2	16	1.1.1.2399.3	26.1099	172313	5672.64	25.56	0.38	378.814
tr|A0A498IWZ8|A0A498IWZ8_MALDO	Phosphoglycerate kinase OS=Malus domestica OX=3750 GN=DVH24_021907 PE=3 SV=1	74.06	0	99	IGVIESLLAK	Methyl(E)@5; Methyl(S)@6	Methyl(E)@211; Methyl(S)@212		0.00109066	1069.68	535.845	1069.67	535.845	2	14	1.1.1.2474.3	27.9455	2815.46	1950	28.11	0.42	152.853
tr|A0A498IWZ8|A0A498IWZ8_MALDO	Phosphoglycerate kinase OS=Malus domestica OX=3750 GN=DVH24_021907 PE=3 SV=1	74.06	0	99	IGVIESLLAK				-0.0002422	1041.64	521.829	1041.64	521.829	2	7	1.1.1.2420.4	26.6129	172313	772.1	25.56	0.38	84.2732
tr|A0A498IWZ8|A0A498IWZ8_MALDO	Phosphoglycerate kinase OS=Malus domestica OX=3750 GN=DVH24_021907 PE=3 SV=1	74.06	0	60.44	IGVIESLLAK				-0.000260555	1041.64	521.829	1041.64	521.829	2	7	1.1.1.2233.10	22.1493	529.84	481.53	22.12	0.17	90.3399
tr|A0A498IWZ8|A0A498IWZ8_MALDO	Phosphoglycerate kinase OS=Malus domestica OX=3750 GN=DVH24_021907 PE=3 SV=1	74.06	0	99	LASLADVYVNDAFGTAHR				0.00193769	1918.96	640.659	1918.95	640.659	3	17	1.1.1.2350.11	24.9442	34922.8	10335.5	24.79	0.34	1608.9
tr|A0A498IWZ8|A0A498IWZ8_MALDO	Phosphoglycerate kinase OS=Malus domestica OX=3750 GN=DVH24_021907 PE=3 SV=1	74.06	0	99	LASLADVYVNDAFGTAHR	Deamidated(N)@10			0.00541134	1919.94	640.988	1919.94	640.987	3	11	1.1.1.2371.7	25.4521	3908.18	874.39	25.17	0.32	556.449
tr|A0A498IWZ8|A0A498IWZ8_MALDO	Phosphoglycerate kinase OS=Malus domestica OX=3750 GN=DVH24_021907 PE=3 SV=1	74.06	0	97.63	LASLADVYVNDAFGTAHR				0.000805613	1918.95	480.746	1918.95	480.746	4	6	1.1.1.2332.4	24.5036	3140.35	693.36	24.76	0.34	127.189
tr|A0A498IWZ8|A0A498IWZ8_MALDO	Phosphoglycerate kinase OS=Malus domestica OX=3750 GN=DVH24_021907 PE=3 SV=1	74.06	0	99	LSELLGLEVK				-0.00246442	1099.65	550.831	1099.65	550.832	2	14	1.1.1.2276.7	23.1855	404710	2265.23	23.51	0.3	192.772
tr|A0A498IWZ8|A0A498IWZ8_MALDO	Phosphoglycerate kinase OS=Malus domestica OX=3750 GN=DVH24_021907 PE=3 SV=1	74.06	0	99	LSELLGLEVK				-0.00246442	1099.65	550.831	1099.65	550.832	2	17	1.1.1.2298.4	23.7013	404710	173599	23.51	0.3	14359.6
tr|A0A498IWZ8|A0A498IWZ8_MALDO	Phosphoglycerate kinase OS=Malus domestica OX=3750 GN=DVH24_021907 PE=3 SV=1	74.06	0	99	LSELLGLEVK				-0.00246442	1099.65	550.831	1099.65	550.832	2	13	1.1.1.2310.10	23.9831	404710	15737.4	23.51	0.3	642.039
tr|A0A498IWZ8|A0A498IWZ8_MALDO	Phosphoglycerate kinase OS=Malus domestica OX=3750 GN=DVH24_021907 PE=3 SV=1	74.06	0	99	LSELLGLEVK				-0.00246442	1099.65	550.831	1099.65	550.832	2	13	1.1.1.2320.3	24.2176	404710	5338.42	23.51	0.3	447.77
tr|A0A498IWZ8|A0A498IWZ8_MALDO	Phosphoglycerate kinase OS=Malus domestica OX=3750 GN=DVH24_021907 PE=3 SV=1	74.06	0	99	LSELLGLEVK				-0.00246442	1099.65	550.831	1099.65	550.832	2	10	1.1.1.2341.7	24.7235	404710	1878.38	23.51	0.3	216.269
tr|A0A498IWZ8|A0A498IWZ8_MALDO	Phosphoglycerate kinase OS=Malus domestica OX=3750 GN=DVH24_021907 PE=3 SV=1	74.06	0	99	LSELLGLEVK				0.0011977	1099.65	550.832	1099.65	550.832	2	9	1.1.1.2362.7	25.2294	1586.36	1224.41	25	0.46	223.743
tr|A0A498IWZ8|A0A498IWZ8_MALDO	Phosphoglycerate kinase OS=Malus domestica OX=3750 GN=DVH24_021907 PE=3 SV=1	74.06	0	99	LSELLGLEVK				0.000221135	1099.65	550.832	1099.65	550.832	2	11	1.1.1.2406.6	26.2753	18337.7	1796.88	25.82	0.4	153.74
tr|A0A498IWZ8|A0A498IWZ8_MALDO	Phosphoglycerate kinase OS=Malus domestica OX=3750 GN=DVH24_021907 PE=3 SV=1	74.06	0	99	LSELLGLEVK	Methyl(S)@2; Methyl(E)@3	Methyl(S)@85; Methyl(E)@86		-3.28136e-05	1127.68	564.847	1127.68	564.847	2	16	1.1.1.2414.6	26.468	15120.8	13849.6	26.41	0.41	896.058
tr|A0A498IWZ8|A0A498IWZ8_MALDO	Phosphoglycerate kinase OS=Malus domestica OX=3750 GN=DVH24_021907 PE=3 SV=1	74.06	0	99	LSELLGLEVK				-0.00124371	1099.65	550.831	1099.65	550.832	2	7	1.1.1.2448.6	27.3037	580.43	541.18	27.34	0.44	74.9776
tr|A0A498IWZ8|A0A498IWZ8_MALDO	Phosphoglycerate kinase OS=Malus domestica OX=3750 GN=DVH24_021907 PE=3 SV=1	74.06	0	99	LSELLGLEVK				-0.00258649	1099.65	550.83	1099.65	550.832	2	9	1.1.1.2494.5	28.4477	505.08	382.13	28.18	0.82	64.6509
tr|A0A498IWZ8|A0A498IWZ8_MALDO	Phosphoglycerate kinase OS=Malus domestica OX=3750 GN=DVH24_021907 PE=3 SV=1	74.06	0	99	LSELLGLEVK				-0.000389217	1099.65	550.832	1099.65	550.832	2	12	1.1.1.2553.2	29.8709	601.58	511.29	29.94	0.6	66.0439
tr|A0A498IWZ8|A0A498IWZ8_MALDO	Phosphoglycerate kinase OS=Malus domestica OX=3750 GN=DVH24_021907 PE=3 SV=1	74.06	0	97.63	LSELLGLEVK				0.000221135	1099.65	550.832	1099.65	550.832	2	7	1.1.1.2427.5	26.7859	18337.7	736.47	25.82	0.4	87.5065
tr|A0A498IWZ8|A0A498IWZ8_MALDO	Phosphoglycerate kinase OS=Malus domestica OX=3750 GN=DVH24_021907 PE=3 SV=1	74.06	0	99	LVAQLPEGGVLLLENVR				0.00138478	1819.06	607.36	1819.06	607.359	3	12	1.1.1.2470.2	27.843	1420.65	495.8	28.03	0.37	167.939
tr|A0A498IWZ8|A0A498IWZ8_MALDO	Phosphoglycerate kinase OS=Malus domestica OX=3750 GN=DVH24_021907 PE=3 SV=1	74.06	0	99	LVAQLPEGGVLLLENVR				0.00376516	1819.06	607.361	1819.06	607.359	3	27	1.1.1.2512.4	28.8938	60297	25007.5	29.05	0.34	3323.74
tr|A0A498IWZ8|A0A498IWZ8_MALDO	Phosphoglycerate kinase OS=Malus domestica OX=3750 GN=DVH24_021907 PE=3 SV=1	74.06	0	99	LVAQLPEGGVLLLENVR				0.00376516	1819.06	607.361	1819.06	607.359	3	20	1.1.1.2533.5	29.4046	60297	8279.59	29.05	0.34	826.989
tr|A0A498IWZ8|A0A498IWZ8_MALDO	Phosphoglycerate kinase OS=Malus domestica OX=3750 GN=DVH24_021907 PE=3 SV=1	74.06	0	99	LVAQLPEGGVLLLENVR				0.00376516	1819.06	607.361	1819.06	607.359	3	19	1.1.1.2546.4	29.7098	60297	964.44	29.05	0.34	833.273
tr|A0A498IWZ8|A0A498IWZ8_MALDO	Phosphoglycerate kinase OS=Malus domestica OX=3750 GN=DVH24_021907 PE=3 SV=1	74.06	0	99	LVAQLPEGGVLLLENVR				0.00376516	1819.06	607.361	1819.06	607.359	3	10	1.1.1.2554.4	29.904	60297	686.39	29.05	0.34	210.025
tr|A0A498IWZ8|A0A498IWZ8_MALDO	Phosphoglycerate kinase OS=Malus domestica OX=3750 GN=DVH24_021907 PE=3 SV=1	74.06	0	97	LVAQLPEGGVLLLENVR	Cation:Na(E)@7			0.00146651	1841.04	614.687	1841.04	614.687	3	10	1.1.1.2511.2	28.8613	2897.98	690.87	29.05	0.31	131.107
tr|A0A498IWZ8|A0A498IWZ8_MALDO	Phosphoglycerate kinase OS=Malus domestica OX=3750 GN=DVH24_021907 PE=3 SV=1	74.06	0	35.64	LVAQLPEGGVLLLENVR	Oxidation(P)@6; Cation:K(E)@7	Oxidation(P)@111		-0.0309988	1872.98	625.333	1873.01	625.343	3	8	1.1.1.2532.3	29.375	2382.42	593.89	29.05	0.34	75.6393
tr|A0A498IWZ8|A0A498IWZ8_MALDO	Phosphoglycerate kinase OS=Malus domestica OX=3750 GN=DVH24_021907 PE=3 SV=1	74.06	0	18.7	MSHISTGGGASL	Oxidation(M)@1		cleaved L-E@C-term	0.000989517	1132.52	567.267	1132.52	567.266	2	5	1.1.1.1844.6	13.1889	685.05	255.88	13.36	0.35	48.3586
tr|A0A498IWZ8|A0A498IWZ8_MALDO	Phosphoglycerate kinase OS=Malus domestica OX=3750 GN=DVH24_021907 PE=3 SV=1	74.06	0	15.42	MSHISTGGGASLELL	Oxidation(M)@1		cleaved L-E@C-term	0.00184251	1487.73	744.873	1487.73	744.872	2	5	1.1.1.2254.20	22.6609	1877.59	1482.46	22.72	0.44	136.568
tr|A0A498IWZ8|A0A498IWZ8_MALDO	Phosphoglycerate kinase OS=Malus domestica OX=3750 GN=DVH24_021907 PE=3 SV=1	74.06	0	99	MSHISTGGGASLELLEGK	Oxidation(M)@1			0.00117564	1801.89	601.637	1801.89	601.637	3	18	1.1.1.2164.12	20.5144	24031	10698.8	20.29	0.33	1061.08
tr|A0A498IWZ8|A0A498IWZ8_MALDO	Phosphoglycerate kinase OS=Malus domestica OX=3750 GN=DVH24_021907 PE=3 SV=1	74.06	0	97.85	MSHISTGGGASLELLEGK	Oxidation(M)@1			0.00117564	1801.89	601.637	1801.89	601.637	3	10	1.1.1.2164.13	20.5153	24031	10642.6	20.29	0.33	543.774
tr|A0A498IWZ8|A0A498IWZ8_MALDO	Phosphoglycerate kinase OS=Malus domestica OX=3750 GN=DVH24_021907 PE=3 SV=1	74.06	0	49.45	MSHISTGGGASLELLEGK	Oxidation(M)@1; Delta:H(4)C(2)(H)@3			-0.0121564	1829.91	610.976	1829.92	610.98	3	10	1.1.1.2156.2	20.3197	491.23	404.44	20.41	0.31	193.327
tr|A0A498IWZ8|A0A498IWZ8_MALDO	Phosphoglycerate kinase OS=Malus domestica OX=3750 GN=DVH24_021907 PE=3 SV=1	74.06	0	49.45	MSHISTGGGASLELLEGK				-5.18321e-05	1785.89	596.305	1785.89	596.305	3	7	1.1.1.2172.4	20.7108	17929.6	432.67	21.01	0.35	143.114
tr|A0A498IWZ8|A0A498IWZ8_MALDO	Phosphoglycerate kinase OS=Malus domestica OX=3750 GN=DVH24_021907 PE=3 SV=1	74.06	0	99	PRLSELLGLEVK	Carbamidomethyl@N-term; Dioxidation(R)@2	Dioxidation(R)@83	cleaved V-P@N-term; missed R-L@2	0.037575	1441.85	721.933	1441.81	721.914	2	9	1.1.1.2285.12	23.4069	1452.41	1300.54	23.44	0.26	177.829
tr|A0A498IWZ8|A0A498IWZ8_MALDO	Phosphoglycerate kinase OS=Malus domestica OX=3750 GN=DVH24_021907 PE=3 SV=1	74.06	0	42.31	RPFAAIVGG			cleaved G-S@C-term	0.00121648	886.504	444.259	886.503	444.259	2	7	1.1.1.2087.6	18.8468	2251.46	1210.18	19.05	0.32	368.338
tr|A0A498IWZ8|A0A498IWZ8_MALDO	Phosphoglycerate kinase OS=Malus domestica OX=3750 GN=DVH24_021907 PE=3 SV=1	74.06	0	39.57	RPFAAIVGGSK				0.000653415	1101.63	551.822	1101.63	551.822	2	7	1.1.1.1987.5	16.5292	9496.93	1126.25	16	0.44	105.625
tr|A0A498IWZ8|A0A498IWZ8_MALDO	Phosphoglycerate kinase OS=Malus domestica OX=3750 GN=DVH24_021907 PE=3 SV=1	74.06	0	99	SKGVSILLPTDVVIADK			missed K-G@2	0.000377129	1754.02	585.68	1754.02	585.68	3	10	1.1.1.2321.5	24.2463	5247.06	1706.28	24.43	0.26	518.417
tr|A0A498IWZ8|A0A498IWZ8_MALDO	Phosphoglycerate kinase OS=Malus domestica OX=3750 GN=DVH24_021907 PE=3 SV=1	74.06	0	99	SKGVSILLPTDVVIADK			missed K-G@2	0.000377129	1754.02	585.68	1754.02	585.68	3	10	1.1.1.2326.8	24.3638	5247.06	4704.17	24.43	0.26	473.008
tr|A0A498IWZ8|A0A498IWZ8_MALDO	Phosphoglycerate kinase OS=Malus domestica OX=3750 GN=DVH24_021907 PE=3 SV=1	74.06	0	99	SKGVSILLPTDVVIADK			missed K-G@2	0.000377129	1754.02	585.68	1754.02	585.68	3	11	1.1.1.2327.11	24.3901	5247.06	5058.74	24.43	0.26	495.048
tr|A0A498IWZ8|A0A498IWZ8_MALDO	Phosphoglycerate kinase OS=Malus domestica OX=3750 GN=DVH24_021907 PE=3 SV=1	74.06	0	99	SKGVSILLPTDVVIADK			missed K-G@2	0.000377129	1754.02	585.68	1754.02	585.68	3	8	1.1.1.2328.11	24.4142	5247.06	5172.27	24.43	0.26	511.578
tr|A0A498IWZ8|A0A498IWZ8_MALDO	Phosphoglycerate kinase OS=Malus domestica OX=3750 GN=DVH24_021907 PE=3 SV=1	74.06	0	99	SKGVSILLPTDVVIADK			missed K-G@2	0.000377129	1754.02	585.68	1754.02	585.68	3	10	1.1.1.2329.14	24.4407	5247.06	5084.22	24.43	0.26	538.077
tr|A0A498IWZ8|A0A498IWZ8_MALDO	Phosphoglycerate kinase OS=Malus domestica OX=3750 GN=DVH24_021907 PE=3 SV=1	74.06	0	99	SKGVSILLPTDVVIADK			missed K-G@2	0.000377129	1754.02	585.68	1754.02	585.68	3	11	1.1.1.2330.6	24.4577	5247.06	4810.57	24.43	0.26	486.601
tr|A0A498IWZ8|A0A498IWZ8_MALDO	Phosphoglycerate kinase OS=Malus domestica OX=3750 GN=DVH24_021907 PE=3 SV=1	74.06	0	99	SKGVSILLPTDVVIADK			missed K-G@2	0.000377129	1754.02	585.68	1754.02	585.68	3	11	1.1.1.2331.9	24.4855	5247.06	4233.48	24.43	0.26	427.66
tr|A0A498IWZ8|A0A498IWZ8_MALDO	Phosphoglycerate kinase OS=Malus domestica OX=3750 GN=DVH24_021907 PE=3 SV=1	74.06	0	99	SKGVSILLPTDVVIADK			missed K-G@2	0.000377129	1754.02	585.68	1754.02	585.68	3	10	1.1.1.2332.6	24.5061	5247.06	3900.29	24.43	0.26	409.569
tr|A0A498IWZ8|A0A498IWZ8_MALDO	Phosphoglycerate kinase OS=Malus domestica OX=3750 GN=DVH24_021907 PE=3 SV=1	74.06	0	99	SKGVSILLPTDVVIADK			missed K-G@2	0.000377129	1754.02	585.68	1754.02	585.68	3	10	1.1.1.2333.6	24.5301	5247.06	3530.3	24.43	0.26	355.494
tr|A0A498IWZ8|A0A498IWZ8_MALDO	Phosphoglycerate kinase OS=Malus domestica OX=3750 GN=DVH24_021907 PE=3 SV=1	74.06	0	98.14	SKGVSILLPTDVVIADK			missed K-G@2	0.000377129	1754.02	585.68	1754.02	585.68	3	7	1.1.1.2336.12	24.6068	5247.06	1866.04	24.43	0.26	278.151
tr|A0A498IWZ8|A0A498IWZ8_MALDO	Phosphoglycerate kinase OS=Malus domestica OX=3750 GN=DVH24_021907 PE=3 SV=1	74.06	0	97	SKGVSILLPTDVVIADK			missed K-G@2	0.000377129	1754.02	585.68	1754.02	585.68	3	7	1.1.1.2338.6	24.6528	5247.06	1179.43	24.43	0.26	233.352
tr|A0A498IWZ8|A0A498IWZ8_MALDO	Phosphoglycerate kinase OS=Malus domestica OX=3750 GN=DVH24_021907 PE=3 SV=1	74.06	0	35.64	SKGVSILLPTDVVIADK			missed K-G@2	0.000377129	1754.02	585.68	1754.02	585.68	3	6	1.1.1.2334.10	24.5567	5247.06	2968.11	24.43	0.26	368.308
tr|A0A498IWZ8|A0A498IWZ8_MALDO	Phosphoglycerate kinase OS=Malus domestica OX=3750 GN=DVH24_021907 PE=3 SV=1	74.06	0	96.41	SVSTLKEAELK			missed K-E@6	0.00126748	1203.67	402.231	1203.67	402.231	3	8	1.1.1.1854.2	13.4125	52988	3295.01	13.64	0.23	425.942
tr|A0A498IWZ8|A0A498IWZ8_MALDO	Phosphoglycerate kinase OS=Malus domestica OX=3750 GN=DVH24_021907 PE=3 SV=1	74.06	0	63.53	SVSTLKEAELK			missed K-E@6	0.00126748	1203.67	402.231	1203.67	402.231	3	8	1.1.1.1876.2	13.9216	52988	3992.01	13.64	0.23	652.884
tr|A0A498IWZ8|A0A498IWZ8_MALDO	Phosphoglycerate kinase OS=Malus domestica OX=3750 GN=DVH24_021907 PE=3 SV=1	74.06	0	49.08	SVSTLKEAELK	Carbamidomethyl(K)@6		missed K-E@6	-0.000165457	1260.69	421.238	1260.69	421.238	3	8	1.1.1.1866.2	13.694	2466.78	2125.32	13.64	0.23	399.129
tr|A0A498IWZ8|A0A498IWZ8_MALDO	Phosphoglycerate kinase OS=Malus domestica OX=3750 GN=DVH24_021907 PE=3 SV=1	74.06	0	36.01	SVSTLKEAELK	Formyl(K)@6		missed K-E@6	0.000551317	1231.67	616.841	1231.67	616.84	2	6	1.1.1.2037.9	17.6825	416.59	375.01	17.72	0.43	103.835
tr|A0A498IWZ8|A0A498IWZ8_MALDO	Phosphoglycerate kinase OS=Malus domestica OX=3750 GN=DVH24_021907 PE=3 SV=1	74.06	0	15.07	SVSTLKEAELK	Carbamyl(K)@6		missed K-E@6	0.00105037	1246.68	624.346	1246.68	624.346	2	8	1.1.1.2032.12	17.5641	7804.82	7258.91	17.53	0.24	350.897
tr|A0A498IWZ8|A0A498IWZ8_MALDO	Phosphoglycerate kinase OS=Malus domestica OX=3750 GN=DVH24_021907 PE=3 SV=1	74.06	0	99	TLPGVLALDDA				-0.000719834	1083.58	542.798	1083.58	542.798	2	16	1.1.1.2381.5	25.6833	81082.3	79257.8	25.7	0.3	6968.87
tr|A0A498IWZ8|A0A498IWZ8_MALDO	Phosphoglycerate kinase OS=Malus domestica OX=3750 GN=DVH24_021907 PE=3 SV=1	74.06	0	99	TLPGVLALDDA	Methyl(D)@9; Methyl(D)@10	Methyl(D)@399; Methyl(D)@400		-0.00024139	1111.61	556.813	1111.61	556.814	2	11	1.1.1.2509.3	28.8174	4332.37	1658.12	29.03	0.36	217.266
tr|A0A498IWZ8|A0A498IWZ8_MALDO	Phosphoglycerate kinase OS=Malus domestica OX=3750 GN=DVH24_021907 PE=3 SV=1	74.06	0	99	TLPGVLALDDA	Methyl(D)@9; Methyl(D)@10	Methyl(D)@399; Methyl(D)@400		-0.00024139	1111.61	556.813	1111.61	556.814	2	10	1.1.1.2530.4	29.3272	4332.37	1101.72	29.03	0.36	147.446
tr|A0A498IWZ8|A0A498IWZ8_MALDO	Phosphoglycerate kinase OS=Malus domestica OX=3750 GN=DVH24_021907 PE=3 SV=1	74.06	0	99	TLPGVLALDDA	Methyl(D)@9; Methyl(D)@10	Methyl(D)@399; Methyl(D)@400		-0.00024139	1111.61	556.813	1111.61	556.814	2	10	1.1.1.2488.3	28.2961	2360.24	624.09	28.56	0.42	98.5221
tr|A0A498IWZ8|A0A498IWZ8_MALDO	Phosphoglycerate kinase OS=Malus domestica OX=3750 GN=DVH24_021907 PE=3 SV=1	74.06	0	95.17	TLPGVLALDDA	Cation:Na(D)@9			-8.89649e-05	1105.56	553.789	1105.56	553.789	2	8	1.1.1.2389.5	25.8813	3818.25	2033.66	25.72	0.38	232.164
tr|A0A498IWZ8|A0A498IWZ8_MALDO	Phosphoglycerate kinase OS=Malus domestica OX=3750 GN=DVH24_021907 PE=3 SV=1	74.06	0	95.17	TLPGVLALDDA	Cation:Na(D)@10			-8.89649e-05	1105.56	553.789	1105.56	553.789	2	8	1.1.1.2389.5	25.8813	3818.25	2033.66	25.72	0.38	232.164
tr|A0A498IWZ8|A0A498IWZ8_MALDO	Phosphoglycerate kinase OS=Malus domestica OX=3750 GN=DVH24_021907 PE=3 SV=1	74.06	0	92.29	TLPGVLALDDA				-0.000719834	1083.58	542.798	1083.58	542.798	2	5	1.1.1.2424.4	26.7111	81082.3	609.23	25.7	0.3	67.831
tr|A0A498IWZ8|A0A498IWZ8_MALDO	Phosphoglycerate kinase OS=Malus domestica OX=3750 GN=DVH24_021907 PE=3 SV=1	74.06	0	77.22	TLPGVLALDDA				-0.000597763	1083.58	542.798	1083.58	542.798	2	5	1.1.1.2360.3	25.1777	2543.35	716.63	24.96	0.31	117.677
tr|A0A498IWZ8|A0A498IWZ8_MALDO	Phosphoglycerate kinase OS=Malus domestica OX=3750 GN=DVH24_021907 PE=3 SV=1	74.06	0	28.44	VAGFLMQK			cleaved S-V@N-term	-0.000968766	892.483	447.249	892.484	447.249	2	6	1.1.1.2073.3	18.5079	1060.58	1053.59	18.53	0.31	369.907
tr|A0A498IWZ8|A0A498IWZ8_MALDO	Phosphoglycerate kinase OS=Malus domestica OX=3750 GN=DVH24_021907 PE=3 SV=1	74.06	0	99	VDLNVPLDDNSNITDDTR				-0.00122103	2014.94	672.655	2014.94	672.655	3	25	1.1.1.2203.9	21.4466	91534.6	48178.1	21.31	0.33	8662.19
tr|A0A498IWZ8|A0A498IWZ8_MALDO	Phosphoglycerate kinase OS=Malus domestica OX=3750 GN=DVH24_021907 PE=3 SV=1	74.06	0	38.28	VILASHLG			cleaved G-R@C-term	-0.00144163	808.479	405.247	808.481	405.248	2	6	1.1.1.1994.2	16.6791	1776.12	1532.59	16.79	0.28	368.344
tr|A0A498IWZ8|A0A498IWZ8_MALDO	Phosphoglycerate kinase OS=Malus domestica OX=3750 GN=DVH24_021907 PE=3 SV=1	74.06	0	74.06	VILASHLGR			cleaved R-P@C-term	-0.00151324	964.58	483.297	964.582	483.298	2	7	1.1.1.1901.5	14.5048	12416	649.21	14.75	0.23	110.411
tr|A0A498IWZ8|A0A498IWZ8_MALDO	Phosphoglycerate kinase OS=Malus domestica OX=3750 GN=DVH24_021907 PE=3 SV=1	74.06	0	99	VNVLLLGGGMIF	Oxidation(M)@10		cleaved F-T@C-term	-5.95558e-05	1247.69	624.855	1247.69	624.855	2	17	1.1.1.2569.7	30.2737	4407.18	4079	30.28	0.05	1039.02
tr|A0A498IWZ8|A0A498IWZ8_MALDO	Phosphoglycerate kinase OS=Malus domestica OX=3750 GN=DVH24_021907 PE=3 SV=1	74.06	0	99	VVPASAIPDGWMGLDIGPDSIK	Oxidation(M)@12			-0.00270167	2253.13	752.051	2253.14	752.052	3	14	1.1.1.2439.8	27.0915	28248.2	3056.3	27.39	0.34	205.026
tr|A0A498IWZ8|A0A498IWZ8_MALDO	Phosphoglycerate kinase OS=Malus domestica OX=3750 GN=DVH24_021907 PE=3 SV=1	74.06	0	99	VVPASAIPDGWMGLDIGPDSIK	Oxidation(M)@12			-0.00270167	2253.13	752.051	2253.14	752.052	3	28	1.1.1.2450.8	27.3628	28248.2	28037	27.39	0.34	7068.23
tr|A0A498IWZ8|A0A498IWZ8_MALDO	Phosphoglycerate kinase OS=Malus domestica OX=3750 GN=DVH24_021907 PE=3 SV=1	74.06	0	99	VVPASAIPDGWMGLDIGPDSIK	Oxidation(M)@12			-0.00139922	2253.13	564.291	2253.14	564.291	4	11	1.1.1.2454.7	27.4543	5793.42	4776.74	27.39	0.27	370.587
tr|A0A498IWZ8|A0A498IWZ8_MALDO	Phosphoglycerate kinase OS=Malus domestica OX=3750 GN=DVH24_021907 PE=3 SV=1	74.06	0	99	VVPASAIPDGWMGLDIGPDSIK	Oxidation(M)@12			-0.00270167	2253.13	752.051	2253.14	752.052	3	17	1.1.1.2460.5	27.6081	28248.2	9238.28	27.39	0.34	519.079
tr|A0A498IWZ8|A0A498IWZ8_MALDO	Phosphoglycerate kinase OS=Malus domestica OX=3750 GN=DVH24_021907 PE=3 SV=1	74.06	0	99	VVPASAIPDGWMGLDIGPDSIK	Oxidation(M)@12			-0.00178614	2253.13	752.052	2253.14	752.052	3	8	1.1.1.2481.2	28.1194	755.05	703.77	28.01	0.3	69.1798
tr|A0A498IWZ8|A0A498IWZ8_MALDO	Phosphoglycerate kinase OS=Malus domestica OX=3750 GN=DVH24_021907 PE=3 SV=1	74.06	0	99	VVPASAIPDGWMGLDIGPDSIK	Pro->pyro-Glu(P)@8; Trp->Kynurenin(W)@11; Oxidation(M)@12			0.00263758	2271.11	758.045	2271.11	758.044	3	11	1.1.1.2494.6	28.451	600.06	558.87	28.41	0.32	159.856
tr|A0A498IWZ8|A0A498IWZ8_MALDO	Phosphoglycerate kinase OS=Malus domestica OX=3750 GN=DVH24_021907 PE=3 SV=1	74.06	0	99	VVPASAIPDGWMGLDIGPDSIK				-0.00207308	2237.14	746.72	2237.14	746.721	3	9	1.1.1.2506.6	28.7454	1109.82	950.05	28.85	0.39	116.326
tr|A0A498IWZ8|A0A498IWZ8_MALDO	Phosphoglycerate kinase OS=Malus domestica OX=3750 GN=DVH24_021907 PE=3 SV=1	74.06	0	99	VVPASAIPDGWMGLDIGPDSIK				-0.00024202	2237.14	746.721	2237.14	746.721	3	16	1.1.1.2527.6	29.2605	20767.1	4061.51	29.51	0.33	276.685
tr|A0A498IWZ8|A0A498IWZ8_MALDO	Phosphoglycerate kinase OS=Malus domestica OX=3750 GN=DVH24_021907 PE=3 SV=1	74.06	0	99	VVPASAIPDGWMGLDIGPDSIK				-0.00024202	2237.14	746.721	2237.14	746.721	3	28	1.1.1.2534.5	29.4324	20767.1	18704.9	29.51	0.33	4481.08
tr|A0A498IWZ8|A0A498IWZ8_MALDO	Phosphoglycerate kinase OS=Malus domestica OX=3750 GN=DVH24_021907 PE=3 SV=1	74.06	0	99	VVPASAIPDGWMGLDIGPDSIK				-0.00024202	2237.14	746.721	2237.14	746.721	3	18	1.1.1.2549.4	29.7841	20767.1	3416.23	29.51	0.33	242.604
tr|A0A498IWZ8|A0A498IWZ8_MALDO	Phosphoglycerate kinase OS=Malus domestica OX=3750 GN=DVH24_021907 PE=3 SV=1	74.06	0	97	VVPASAIPDGWMGLDIGPDSIK	Dioxidation(W)@11			0.000514967	2269.13	757.384	2269.13	757.384	3	8	1.1.1.2386.12	25.8056	4351	601.16	26.22	0.33	169.033
tr|A0A498IWZ8|A0A498IWZ8_MALDO	Phosphoglycerate kinase OS=Malus domestica OX=3750 GN=DVH24_021907 PE=3 SV=1	74.06	0	97	VVPASAIPDGWMGLDIGPDSIK				8.41825e-05	2237.14	560.292	2237.14	560.292	4	8	1.1.1.2529.2	29.2976	2630	672.12	29.51	0.28	122.411
tr|A0A498IWZ8|A0A498IWZ8_MALDO	Phosphoglycerate kinase OS=Malus domestica OX=3750 GN=DVH24_021907 PE=3 SV=1	74.06	0	95.17	VVPASAIPDGWMGLDIGPDSIK	Oxidation(P)@8; Oxidation(M)@12	Oxidation(P)@292		0.000514967	2269.13	757.384	2269.13	757.384	3	8	1.1.1.2386.12	25.8056	4351	601.16	26.22	0.33	169.033
tr|A0A498IWZ8|A0A498IWZ8_MALDO	Phosphoglycerate kinase OS=Malus domestica OX=3750 GN=DVH24_021907 PE=3 SV=1	74.06	0	92.29	VVPASAIPDGWMGLDIGPDSIK	Oxidation(M)@12			0.00407324	2253.14	752.054	2253.14	752.052	3	7	1.1.1.2523.3	29.1645	777.7	624.33	29.34	0.44	102.614
tr|A0A498IWZ8|A0A498IWZ8_MALDO	Phosphoglycerate kinase OS=Malus domestica OX=3750 GN=DVH24_021907 PE=3 SV=1	74.06	0	87.87	VVPASAIPDGWMGLDIGPDSIK	Dioxidation(W)@11			0.000148756	2269.13	757.384	2269.13	757.384	3	7	1.1.1.2459.5	27.577	929.45	378.1	27.76	0.32	200.799
tr|A0A498IWZ8|A0A498IWZ8_MALDO	Phosphoglycerate kinase OS=Malus domestica OX=3750 GN=DVH24_021907 PE=3 SV=1	74.06	0	87.87	VVPASAIPDGWMGLDIGPDSIK	Pro->pyro-Glu(P)@8; Trp->Hydroxykynurenin(W)@11			0.00263758	2271.11	758.045	2271.11	758.044	3	11	1.1.1.2494.6	28.451	600.06	558.87	28.41	0.32	159.856
tr|A0A498IWZ8|A0A498IWZ8_MALDO	Phosphoglycerate kinase OS=Malus domestica OX=3750 GN=DVH24_021907 PE=3 SV=1	74.06	0	77.22	VVPASAIPDGWMGLDIGPDSIK	Oxidation(P)@8; Oxidation(M)@12	Oxidation(P)@292		0.000148756	2269.13	757.384	2269.13	757.384	3	7	1.1.1.2459.5	27.577	929.45	378.1	27.76	0.32	200.799
tr|A0A498IWZ8|A0A498IWZ8_MALDO	Phosphoglycerate kinase OS=Malus domestica OX=3750 GN=DVH24_021907 PE=3 SV=1	74.06	0	72.43	VVPASAIPDGWMGLDIGPDSIK	Oxidation(W)@11; Oxidation(M)@12			0.000514967	2269.13	757.384	2269.13	757.384	3	8	1.1.1.2386.12	25.8056	4351	601.16	26.22	0.33	169.033
tr|A0A498IWZ8|A0A498IWZ8_MALDO	Phosphoglycerate kinase OS=Malus domestica OX=3750 GN=DVH24_021907 PE=3 SV=1	74.06	0	41.91	VVPASAIPDGWMGLDIGPDSIK	Dioxidation(M)@12	Dioxidation(M)@296		0.000514967	2269.13	757.384	2269.13	757.384	3	8	1.1.1.2386.12	25.8056	4351	601.16	26.22	0.33	169.033
tr|A0A498IWZ8|A0A498IWZ8_MALDO	Phosphoglycerate kinase OS=Malus domestica OX=3750 GN=DVH24_021907 PE=3 SV=1	74.06	0	35.64	VVPASAIPDGWMGLDIGPDSIK	Dioxidation(W)@11			0.000514967	2269.13	757.384	2269.13	757.384	3	7	1.1.1.2408.16	26.334	4351	2683.75	26.22	0.33	273.583
tr|A0A498IWZ8|A0A498IWZ8_MALDO	Phosphoglycerate kinase OS=Malus domestica OX=3750 GN=DVH24_021907 PE=3 SV=1	74.06	0	35.64	VVPASAIPDGWMGLDIGPDSIK	Dioxidation(M)@12	Dioxidation(M)@296		0.000148756	2269.13	757.384	2269.13	757.384	3	7	1.1.1.2459.5	27.577	929.45	378.1	27.76	0.32	200.799
tr|A0A498IWZ8|A0A498IWZ8_MALDO	Phosphoglycerate kinase OS=Malus domestica OX=3750 GN=DVH24_021907 PE=3 SV=1	74.06	0	35.64	VVPASAIPDGWMGLDIGPDSIK	Oxidation(W)@11; Oxidation(M)@12			0.000148756	2269.13	757.384	2269.13	757.384	3	7	1.1.1.2459.5	27.577	929.45	378.1	27.76	0.32	200.799
tr|A0A498IWZ8|A0A498IWZ8_MALDO	Phosphoglycerate kinase OS=Malus domestica OX=3750 GN=DVH24_021907 PE=3 SV=1	74.06	0	99	YLKPSVAGFLMQK				8.73952e-05	1480.81	494.611	1480.81	494.611	3	9	1.1.1.2261.7	22.8211	13980.4	1463.33	23.13	0.36	366.109
tr|A0A498IWZ8|A0A498IWZ8_MALDO	Phosphoglycerate kinase OS=Malus domestica OX=3750 GN=DVH24_021907 PE=3 SV=1	74.06	0	99	YLKPSVAGFLMQK				8.73952e-05	1480.81	494.611	1480.81	494.611	3	11	1.1.1.2281.2	23.2973	13980.4	7300.63	23.13	0.36	1245.89
tr|A0A498IWZ8|A0A498IWZ8_MALDO	Phosphoglycerate kinase OS=Malus domestica OX=3750 GN=DVH24_021907 PE=3 SV=1	74.06	0	97	YLKPSVAGFLMQK	Carbamyl(K)@3			-0.00117105	1523.82	762.915	1523.82	762.916	2	7	1.1.1.2430.9	26.8668	3521.4	809.12	26.6	0.32	61.615
tr|A0A498IWZ8|A0A498IWZ8_MALDO	Phosphoglycerate kinase OS=Malus domestica OX=3750 GN=DVH24_021907 PE=3 SV=1	74.06	0	54.86	YLKPSVAGFLMQK				8.73952e-05	1480.81	494.611	1480.81	494.611	3	5	1.1.1.2260.7	22.7967	13980.4	802.64	23.13	0.36	352.315
tr|A0A498IWZ8|A0A498IWZ8_MALDO	Phosphoglycerate kinase OS=Malus domestica OX=3750 GN=DVH24_021907 PE=3 SV=1	74.06	0	35.64	YLKPSVAGFLMQK				0.000185333	1480.81	741.413	1480.81	741.413	2	6	1.1.1.2277.19	23.2147	5110.95	4223.32	23.08	0.41	295.892
tr|A0A498IWZ8|A0A498IWZ8_MALDO	Phosphoglycerate kinase OS=Malus domestica OX=3750 GN=DVH24_021907 PE=3 SV=1	74.06	0	98.14	YLLGHGAK				0.00168046	857.478	429.746	857.476	429.745	2	8	1.1.1.1712.2	10.7561	1016.46	748.4	10.69	0.23	121.305
tr|A0A498IWZ8|A0A498IWZ8_MALDO	Phosphoglycerate kinase OS=Malus domestica OX=3750 GN=DVH24_021907 PE=3 SV=1	74.06	0	37.23	YLLGHGAK				0.000887	857.477	429.746	857.476	429.745	2	5	1.1.1.1779.2	11.7925	6419.04	375.95	11.3	0.29	176.972
tr|A0A498IWZ8|A0A498IWZ8_MALDO	Phosphoglycerate kinase OS=Malus domestica OX=3750 GN=DVH24_021907 PE=3 SV=1	74.06	0	99	YSLKPLVPR				-0.00022963	1071.64	536.829	1071.64	536.829	2	8	1.1.1.2052.9	18.04	36388.2	27490.8	17.94	0.29	1463.14

## Sheet: Spot 10
Accession #	Name
tr|A0A498I550|A0A498I550_MALDO	Fructose-bisphosphate aldolase OS=Malus domestica OX=3750 GN=DVH24_019121 PE=3 SV=1
Accessions	Names	%Cov(95)	Contrib	Conf	Sequence	Modifications	ProteinModifications	Cleavages	dMass	Obs MW	Obs m/z	Theor MW	Theor m/z	Theor z	Sc	Spectrum	Acq Time	Intensity (Peptide)	PrecursorIntensityAcquisition	Apex Time (Peptide)	Elution Peak Width (Peptide)	MS2Counts
tr|A0A498I550|A0A498I550_MALDO	Fructose-bisphosphate aldolase OS=Malus domestica OX=3750 GN=DVH24_019121 PE=3 SV=1	40.92	2	99	AKANSEATLGTYK			missed K-A@2	-0.00114392	1352.69	451.905	1352.69	451.905	3	13	1.1.1.1739.4	11.4058	858.09	461.5	11.56	0.32	89.8263
tr|A0A498I550|A0A498I550_MALDO	Fructose-bisphosphate aldolase OS=Malus domestica OX=3750 GN=DVH24_019121 PE=3 SV=1	40.92	2	99	ANSEATLGTYK				-0.00189883	1153.56	577.787	1153.56	577.788	2	9	1.1.1.1807.5	12.8065	1575.86	503.21	13.02	0.26	74.29
tr|A0A498I550|A0A498I550_MALDO	Fructose-bisphosphate aldolase OS=Malus domestica OX=3750 GN=DVH24_019121 PE=3 SV=1	40.92	2	99	AQAALLTR				0.00125457	842.499	422.257	842.497	422.256	2	13	1.1.1.1830.3	13.3	95316.1	77699.5	13.22	0.26	11305.5
tr|A0A498I550|A0A498I550_MALDO	Fructose-bisphosphate aldolase OS=Malus domestica OX=3750 GN=DVH24_019121 PE=3 SV=1	40.92	2	99	AQEAFLTR				0.000261439	934.487	468.251	934.487	468.251	2	13	1.1.1.1913.8	15.2584	6698.34	6636.65	15.25	0.31	1038.87
tr|A0A498I550|A0A498I550_MALDO	Fructose-bisphosphate aldolase OS=Malus domestica OX=3750 GN=DVH24_019121 PE=3 SV=1	40.92	2	99	ASPEVIAEYTVR	Delta:H(4)C(2)@N-term			0.0194465	1361.74	681.876	1361.72	681.867	2	11	1.1.1.2234.8	22.7323	5007.78	3329.57	22.6	0.39	329.357
tr|A0A498I550|A0A498I550_MALDO	Fructose-bisphosphate aldolase OS=Malus domestica OX=3750 GN=DVH24_019121 PE=3 SV=1	40.92	2	99	AVLKIGPNEPSQLSIQENANGLAR	Carbamyl@N-term; Deamidated(Q)@12		missed K-I@4	-0.000449999	2562.34	855.12	2562.34	855.121	3	13	1.1.1.2258.12	23.3181	1153.15	906.3	23.42	0.24	183.576
tr|A0A498I550|A0A498I550_MALDO	Fructose-bisphosphate aldolase OS=Malus domestica OX=3750 GN=DVH24_019121 PE=3 SV=1	40.92	2	99	EGGVLPGIK				0.000647633	868.503	435.259	868.502	435.258	2	13	1.1.1.1990.2	17.0064	106727	13102.4	17.24	0.26	2371.59
tr|A0A498I550|A0A498I550_MALDO	Fructose-bisphosphate aldolase OS=Malus domestica OX=3750 GN=DVH24_019121 PE=3 SV=1	40.92	2	99	EGGVLPGIKVDK			missed K-V@9	-0.00129118	1210.69	606.353	1210.69	606.353	2	13	1.1.1.1994.3	17.1119	3647.23	1911.64	17.21	0.24	345.948
tr|A0A498I550|A0A498I550_MALDO	Fructose-bisphosphate aldolase OS=Malus domestica OX=3750 GN=DVH24_019121 PE=3 SV=1	40.92	2	99	ELLFTAPDVLQY			cleaved Y-L@C-term	0.0151702	1407.74	704.879	1407.73	704.872	2	8	1.1.1.2533.9	30.0388	708.24	579.85	30.07	0.1	82.9548
tr|A0A498I550|A0A498I550_MALDO	Fructose-bisphosphate aldolase OS=Malus domestica OX=3750 GN=DVH24_019121 PE=3 SV=1	40.92	2	99	FASINVENVESNR				-0.000975113	1477.72	739.865	1477.72	739.865	2	16	1.1.1.2088.2	19.2423	18490.6	1204.04	18.98	0.24	107.062
tr|A0A498I550|A0A498I550_MALDO	Fructose-bisphosphate aldolase OS=Malus domestica OX=3750 GN=DVH24_019121 PE=3 SV=1	40.92	2	99	GILAADESTGTIGK				-0.00175439	1331.69	666.853	1331.69	666.854	2	21	1.1.1.1975.2	16.6707	36556.2	3272.88	16.89	0.23	304.611
tr|A0A498I550|A0A498I550_MALDO	Fructose-bisphosphate aldolase OS=Malus domestica OX=3750 GN=DVH24_019121 PE=3 SV=1	40.92	2	99	GILAADESTGTIGKR			missed K-R@14	-0.00109931	1487.79	496.938	1487.79	496.939	3	17	1.1.1.1934.2	15.7063	59882	13000.9	15.46	0.26	1129.43
tr|A0A498I550|A0A498I550_MALDO	Fructose-bisphosphate aldolase OS=Malus domestica OX=3750 GN=DVH24_019121 PE=3 SV=1	40.92	2	99	GKYADELIANAAYIGTPGK			missed K-Y@2	0.0324359	1951.04	651.353	1951.01	651.342	3	14	1.1.1.2271.12	23.6316	1167.88	1002.46	23.55	0.65	303.119
tr|A0A498I550|A0A498I550_MALDO	Fructose-bisphosphate aldolase OS=Malus domestica OX=3750 GN=DVH24_019121 PE=3 SV=1	40.92	2	99	GTVELAGTNGETTTQGLDGLAQR	Deamidated(N)@9			-0.00082047	2289.11	764.043	2289.11	764.043	3	31	1.1.1.2142.3	20.5049	14795.1	10822.6	20.59	0.24	2246.21
tr|A0A498I550|A0A498I550_MALDO	Fructose-bisphosphate aldolase OS=Malus domestica OX=3750 GN=DVH24_019121 PE=3 SV=1	40.92	2	99	IGPNEPSQLSIQENANGLAR				-0.00313138	2107.06	703.361	2107.07	703.363	3	23	1.1.1.2113.10	19.8453	34105.8	33598.6	19.83	0.29	2882.02
tr|A0A498I550|A0A498I550_MALDO	Fructose-bisphosphate aldolase OS=Malus domestica OX=3750 GN=DVH24_019121 PE=3 SV=1	40.92	2	99	KPWSLSF			cleaved N-K@N-term; cleaved F-S@C-term	0.0424523	863.497	432.756	863.454	432.734	2	5	1.1.1.2318.3	24.763	1433.99	1347.51	24.88	0.63	250.424
tr|A0A498I550|A0A498I550_MALDO	Fructose-bisphosphate aldolase OS=Malus domestica OX=3750 GN=DVH24_019121 PE=3 SV=1	40.92	2	99	LGEGAAESLHVK				0.00416516	1209.64	404.221	1209.64	404.219	3	18	1.1.1.1880.2	14.4581	40090.8	29050.4	14.36	0.26	5077.26
tr|A0A498I550|A0A498I550_MALDO	Fructose-bisphosphate aldolase OS=Malus domestica OX=3750 GN=DVH24_019121 PE=3 SV=1	40.92	2	99	TASGKPFVDVLK				-0.000324246	1260.71	631.361	1260.71	631.361	2	18	1.1.1.2051.6	18.4262	20782.8	7406.42	18.58	0.33	632.431
tr|A0A498I550|A0A498I550_MALDO	Fructose-bisphosphate aldolase OS=Malus domestica OX=3750 GN=DVH24_019121 PE=3 SV=1	40.92	2	99	VDKGTVELAGTNGETTTQGLDGLAQR	Deamidated(N)@12		missed K-G@3	-0.000555502	2631.3	658.832	2631.3	658.832	4	18	1.1.1.2109.10	19.7455	2241.08	1807.25	19.68	0.36	657.519
tr|A0A498I550|A0A498I550_MALDO	Fructose-bisphosphate aldolase OS=Malus domestica OX=3750 GN=DVH24_019121 PE=3 SV=1	40.92	2	99	YADELIANAAYIGTPGK				0.0427472	1765.93	589.651	1765.89	589.637	3	15	1.1.1.2262.3	23.4056	11443.6	3994.73	23.21	0.29	691.504
tr|A0A498I550|A0A498I550_MALDO	Fructose-bisphosphate aldolase OS=Malus domestica OX=3750 GN=DVH24_019121 PE=3 SV=1	40.92	1.79588	98.74	KASPEVIAEYTVR			missed K-A@1	0.000163209	1461.78	488.268	1461.78	488.268	3	16	1.1.1.2037.2	18.0979	24232.4	6702.38	17.88	0.29	1129.07
tr|A0A498I550|A0A498I550_MALDO	Fructose-bisphosphate aldolase OS=Malus domestica OX=3750 GN=DVH24_019121 PE=3 SV=1	40.92	1.52288	97.36	GTVELAGTNGETTTQGLDGLGER				-0.00929506	2275.08	759.369	2275.09	759.372	3	9	1.1.1.2120.6	20.0099	660.54	321.23	20.21	0.47	157.757
tr|A0A498I550|A0A498I550_MALDO	Fructose-bisphosphate aldolase OS=Malus domestica OX=3750 GN=DVH24_019121 PE=3 SV=1	40.92	1.49485	97.45	AWAGKEENIPK			missed K-E@5	-0.000936706	1241.64	414.887	1241.64	414.887	3	12	1.1.1.1836.2	13.4438	17711.7	7532.91	13.24	0.29	974.999
tr|A0A498I550|A0A498I550_MALDO	Fructose-bisphosphate aldolase OS=Malus domestica OX=3750 GN=DVH24_019121 PE=3 SV=1	40.92	1.39794	96.41	VLAACYK	Carbamidomethyl(C)@5			-0.000225807	823.426	412.72	823.426	412.72	2	8	1.1.1.1751.2	11.6489	39264.6	1566.1	11.87	0.21	181.626
tr|A0A498I550|A0A498I550_MALDO	Fructose-bisphosphate aldolase OS=Malus domestica OX=3750 GN=DVH24_019121 PE=3 SV=1	40.92	0.946922	89.81	AKANSEATLGTYKGDAK			missed K-A@2; missed K-G@13	-0.00533238	1723.87	431.974	1723.87	431.976	4	9	1.1.1.1756.2	11.7631	212.3	146.67	11.62	0.27	104.388
tr|A0A498I550|A0A498I550_MALDO	Fructose-bisphosphate aldolase OS=Malus domestica OX=3750 GN=DVH24_019121 PE=3 SV=1	40.92	0.882729	91.36	TAAGKPFVDVLK				0.0022033	1244.71	415.912	1244.71	415.912	3	9	1.1.1.2077.2	19.0329	5371.62	4393.89	18.96	0.33	753.528
tr|A0A498I550|A0A498I550_MALDO	Fructose-bisphosphate aldolase OS=Malus domestica OX=3750 GN=DVH24_019121 PE=3 SV=1	40.92	0.37366	60.43	YYEAGAR				-0.00115786	828.375	415.195	828.377	415.196	2	5	1.1.1.1494.2	8.98672	179.64	177.98	9	0.54	40.3372
tr|A0A498I550|A0A498I550_MALDO	Fructose-bisphosphate aldolase OS=Malus domestica OX=3750 GN=DVH24_019121 PE=3 SV=1	40.92	0.100727	67.49	ALQQSTLK	Deamidated(Q)@3			-0.000656605	888.491	445.253	888.492	445.253	2	8	1.1.1.1671.3	10.6258	1445.91	275.1	10.91	0.2	70.729
tr|A0A498I550|A0A498I550_MALDO	Fructose-bisphosphate aldolase OS=Malus domestica OX=3750 GN=DVH24_019121 PE=3 SV=1	40.92	0.0414361	98.41	SLSFSFGR			cleaved W-S@N-term	0.00222394	899.452	450.733	899.45	450.732	2	10	1.1.1.2203.4	21.9658	16775	16682	21.96	0.39	2472.71
tr|A0A498I550|A0A498I550_MALDO	Fructose-bisphosphate aldolase OS=Malus domestica OX=3750 GN=DVH24_019121 PE=3 SV=1	40.92	0.0105502	98.23	LAADESTGTIGKR			cleaved I-L@N-term; missed K-R@12	-0.00198135	1317.69	659.851	1317.69	659.852	2	9	1.1.1.1915.2	15.3106	1233.2	474.96	15.48	0.22	61.9769
tr|A0A498I550|A0A498I550_MALDO	Fructose-bisphosphate aldolase OS=Malus domestica OX=3750 GN=DVH24_019121 PE=3 SV=1	40.92	0.00174067	20.05	PFVDVLK			cleaved K-P@N-term	0.000352388	816.475	409.245	816.475	409.245	2	5	1.1.1.2155.2	20.804	2149.77	294.24	20.49	0.33	246.616
tr|A0A498I550|A0A498I550_MALDO	Fructose-bisphosphate aldolase OS=Malus domestica OX=3750 GN=DVH24_019121 PE=3 SV=1	40.92	0.000434506	23.91	IGPNEPSQLSIQENAN			cleaved N-G@C-term	0.00427043	1709.83	855.92	1709.82	855.918	2	6	1.1.1.2057.18	18.5704	384.58	333.47	18.6	0.26	63.1332
tr|A0A498I550|A0A498I550_MALDO	Fructose-bisphosphate aldolase OS=Malus domestica OX=3750 GN=DVH24_019121 PE=3 SV=1	40.92	0.000434506	40.04	LNAMNQLK			cleaved N-L@N-term	0.00132531	930.497	466.256	930.496	466.255	2	7	1.1.1.1873.3	14.2922	334.3	255.92	14.38	0.62	120.037
tr|A0A498I550|A0A498I550_MALDO	Fructose-bisphosphate aldolase OS=Malus domestica OX=3750 GN=DVH24_019121 PE=3 SV=1	40.92	0	75.94	AKANSEATLGTYKGDAK			missed K-A@2; missed K-G@13	-0.001304	1723.87	431.976	1723.87	431.976	4	9	1.1.1.1728.2	11.2501	1522.28	439.9	10.93	0.41	83.0795
tr|A0A498I550|A0A498I550_MALDO	Fructose-bisphosphate aldolase OS=Malus domestica OX=3750 GN=DVH24_019121 PE=3 SV=1	40.92	0	74.65	AKANSEATLGTYKGDAK			missed K-A@2; missed K-G@13	-0.001304	1723.87	431.976	1723.87	431.976	4	9	1.1.1.1677.2	10.7178	1522.28	467.21	10.93	0.41	90.3134
tr|A0A498I550|A0A498I550_MALDO	Fructose-bisphosphate aldolase OS=Malus domestica OX=3750 GN=DVH24_019121 PE=3 SV=1	40.92	0	99	AQAALLTR				0.00125457	842.499	422.257	842.497	422.256	2	12	1.1.1.1820.2	13.081	95316.1	38186.4	13.22	0.26	3178.43
tr|A0A498I550|A0A498I550_MALDO	Fructose-bisphosphate aldolase OS=Malus domestica OX=3750 GN=DVH24_019121 PE=3 SV=1	40.92	0	97.66	AQAALLTR	Deamidated(Q)@2			0.0010794	843.482	422.748	843.481	422.748	2	11	1.1.1.1874.3	14.3135	9525.13	2331.82	14.07	0.27	534.629
tr|A0A498I550|A0A498I550_MALDO	Fructose-bisphosphate aldolase OS=Malus domestica OX=3750 GN=DVH24_019121 PE=3 SV=1	40.92	0	96.59	AQAALLTR				0.00125457	842.499	422.257	842.497	422.256	2	8	1.1.1.1852.3	13.801	95316.1	879.17	13.22	0.26	232.983
tr|A0A498I550|A0A498I550_MALDO	Fructose-bisphosphate aldolase OS=Malus domestica OX=3750 GN=DVH24_019121 PE=3 SV=1	40.92	0	94.13	AQAALLTR				0.00125457	842.499	422.257	842.497	422.256	2	9	1.1.1.1844.3	13.614	95316.1	2478.15	13.22	0.26	363.253
tr|A0A498I550|A0A498I550_MALDO	Fructose-bisphosphate aldolase OS=Malus domestica OX=3750 GN=DVH24_019121 PE=3 SV=1	40.92	0	51.53	AQEAFLTR				0.000261439	934.487	468.251	934.487	468.251	2	7	1.1.1.1907.5	15.1133	6698.34	2957.85	15.25	0.31	198.4
tr|A0A498I550|A0A498I550_MALDO	Fructose-bisphosphate aldolase OS=Malus domestica OX=3750 GN=DVH24_019121 PE=3 SV=1	40.92	0	99	ASPEVIAEYTVR				-2.36896e-05	1333.69	667.851	1333.69	667.851	2	17	1.1.1.2125.3	20.1125	51898	27879	19.97	0.31	3120.68
tr|A0A498I550|A0A498I550_MALDO	Fructose-bisphosphate aldolase OS=Malus domestica OX=3750 GN=DVH24_019121 PE=3 SV=1	40.92	0	95.82	ASPEVIAEYTVR				-2.36896e-05	1333.69	667.851	1333.69	667.851	2	8	1.1.1.2103.10	19.6027	51898	637.83	19.97	0.31	110.211
tr|A0A498I550|A0A498I550_MALDO	Fructose-bisphosphate aldolase OS=Malus domestica OX=3750 GN=DVH24_019121 PE=3 SV=1	40.92	0	88.94	ASPEVIAEYTVR				-2.36896e-05	1333.69	667.851	1333.69	667.851	2	7	1.1.1.2147.15	20.6239	51898	525.83	19.97	0.31	110.33
tr|A0A498I550|A0A498I550_MALDO	Fructose-bisphosphate aldolase OS=Malus domestica OX=3750 GN=DVH24_019121 PE=3 SV=1	40.92	0	25.1	ASPEVIAEYTVR	Dimethyl(R)@12	Dimethyl(R)@601		0.00225858	1361.72	681.868	1361.72	681.867	2	6	1.1.1.2213.4	22.2133	5007.78	480.24	22.6	0.39	105.113
tr|A0A498I550|A0A498I550_MALDO	Fructose-bisphosphate aldolase OS=Malus domestica OX=3750 GN=DVH24_019121 PE=3 SV=1	40.92	0	23.25	ASPEVIAEYTVR	HNE(A)@1	HNE(A)@590		0.010971	1489.81	497.612	1489.8	497.608	3	11	1.1.1.2121.2	20.0235	1706.46	838.78	20.23	0.5	251.912
tr|A0A498I550|A0A498I550_MALDO	Fructose-bisphosphate aldolase OS=Malus domestica OX=3750 GN=DVH24_019121 PE=3 SV=1	40.92	0	44.56	AVLKIGPNEPSQLSIQENANGLAR	Carbamyl(K)@4; Deamidated(Q)@12		missed K-I@4	-0.000449999	2562.34	855.12	2562.34	855.121	3	13	1.1.1.2258.12	23.3181	1153.15	906.3	23.42	0.24	183.576
tr|A0A498I550|A0A498I550_MALDO	Fructose-bisphosphate aldolase OS=Malus domestica OX=3750 GN=DVH24_019121 PE=3 SV=1	40.92	0	55.99	AWAGKEENIPK	Carbamyl(K)@5		missed K-E@5	0.0016973	1284.65	643.331	1284.65	643.33	2	9	1.1.1.1984.8	16.8774	1540.2	542.27	16.72	0.28	193.802
tr|A0A498I550|A0A498I550_MALDO	Fructose-bisphosphate aldolase OS=Malus domestica OX=3750 GN=DVH24_019121 PE=3 SV=1	40.92	0	31.63	AWAGKEENIPK			missed K-E@5	-0.000936706	1241.64	414.887	1241.64	414.887	3	7	1.1.1.1859.3	13.9564	17711.7	655.73	13.24	0.29	201.28
tr|A0A498I550|A0A498I550_MALDO	Fructose-bisphosphate aldolase OS=Malus domestica OX=3750 GN=DVH24_019121 PE=3 SV=1	40.92	0	99	EGGVLPGIK				0.000647633	868.503	435.259	868.502	435.258	2	11	1.1.1.2013.7	17.5234	106727	13332.1	17.24	0.26	2426.88
tr|A0A498I550|A0A498I550_MALDO	Fructose-bisphosphate aldolase OS=Malus domestica OX=3750 GN=DVH24_019121 PE=3 SV=1	40.92	0	89.97	EGGVLPGIK	Glu->pyro-Glu@N-term			-0.000290087	850.491	426.253	850.491	426.253	2	7	1.1.1.2139.4	20.4311	4151.91	570.99	20.66	0.26	324.89
tr|A0A498I550|A0A498I550_MALDO	Fructose-bisphosphate aldolase OS=Malus domestica OX=3750 GN=DVH24_019121 PE=3 SV=1	40.92	0	41.26	EGGVLPGIK				0.000647633	868.503	435.259	868.502	435.258	2	5	1.1.1.2034.6	18.0239	106727	752.86	17.24	0.26	306.487
tr|A0A498I550|A0A498I550_MALDO	Fructose-bisphosphate aldolase OS=Malus domestica OX=3750 GN=DVH24_019121 PE=3 SV=1	40.92	0	95.82	EGGVLPGIKVDK	Glu->pyro-Glu@N-term		missed K-V@9	-0.00080245	1192.68	597.348	1192.68	597.348	2	10	1.1.1.2120.5	20.0065	3543.43	1951.9	19.88	0.26	364.771
tr|A0A498I550|A0A498I550_MALDO	Fructose-bisphosphate aldolase OS=Malus domestica OX=3750 GN=DVH24_019121 PE=3 SV=1	40.92	0	99	FASINVENVESNR				-0.000975113	1477.72	739.865	1477.72	739.865	2	12	1.1.1.2064.13	18.7315	18490.6	2600.28	18.98	0.24	183.226
tr|A0A498I550|A0A498I550_MALDO	Fructose-bisphosphate aldolase OS=Malus domestica OX=3750 GN=DVH24_019121 PE=3 SV=1	40.92	0	57.33	FASINVENVESNR	Dimethyl(N)@8	Dimethyl(N)@399		0.00547296	1505.75	753.884	1505.75	753.881	2	7	1.1.1.2184.13	21.5161	1131.7	1122.48	21.5	0.34	94.0685
tr|A0A498I550|A0A498I550_MALDO	Fructose-bisphosphate aldolase OS=Malus domestica OX=3750 GN=DVH24_019121 PE=3 SV=1	40.92	0	20.67	FASINVENVESNRR	Arg-loss@C-term		missed R-R@13	-0.000975097	1477.72	739.865	1477.72	739.865	2	17	1.1.1.2088.2	19.2423	18490.6	1204.04	18.98	0.24	107.062
tr|A0A498I550|A0A498I550_MALDO	Fructose-bisphosphate aldolase OS=Malus domestica OX=3750 GN=DVH24_019121 PE=3 SV=1	40.92	0	15.41	GDAKLGEGAAESLHVK	Lys->Allysine(K)@4	Lys->Allysine(K)@342	missed K-L@4	0.0724263	1579.86	527.626	1579.78	527.602	3	8	1.1.1.1870.3	14.2323	1597.22	719.54	14.33	0.19	106.262
tr|A0A498I550|A0A498I550_MALDO	Fructose-bisphosphate aldolase OS=Malus domestica OX=3750 GN=DVH24_019121 PE=3 SV=1	40.92	0	99	GILAADESTGTIGK				-0.00175439	1331.69	666.853	1331.69	666.854	2	21	1.1.1.1998.3	17.1857	36556.2	2290.15	16.89	0.23	338.702
tr|A0A498I550|A0A498I550_MALDO	Fructose-bisphosphate aldolase OS=Malus domestica OX=3750 GN=DVH24_019121 PE=3 SV=1	40.92	0	75.94	GILAADESTGTIGK	Delta:H(4)C(2)(K)@14			0.00126008	1359.73	680.87	1359.72	680.87	2	8	1.1.1.2127.6	20.1534	2800.82	1005.31	20.33	0.28	133.681
tr|A0A498I550|A0A498I550_MALDO	Fructose-bisphosphate aldolase OS=Malus domestica OX=3750 GN=DVH24_019121 PE=3 SV=1	40.92	0	40.44	GILAADESTGTIGK	Dimethyl(K)@14	Dimethyl(K)@38		0.00126008	1359.73	680.87	1359.72	680.87	2	8	1.1.1.2127.6	20.1534	2800.82	1005.31	20.33	0.28	133.681
tr|A0A498I550|A0A498I550_MALDO	Fructose-bisphosphate aldolase OS=Malus domestica OX=3750 GN=DVH24_019121 PE=3 SV=1	40.92	0	18.04	GILAADESTGTIGK				-0.00177329	1331.69	444.904	1331.69	444.905	3	15	1.1.1.1992.3	17.0541	2051.79	640.46	16.91	0.23	571.273
tr|A0A498I550|A0A498I550_MALDO	Fructose-bisphosphate aldolase OS=Malus domestica OX=3750 GN=DVH24_019121 PE=3 SV=1	40.92	0	99	GILAADESTGTIGKR	Arg-loss@C-term		missed K-R@14	-0.00177327	1331.69	444.904	1331.69	444.905	3	16	1.1.1.1992.3	17.0541	2051.79	640.46	16.91	0.23	571.273
tr|A0A498I550|A0A498I550_MALDO	Fructose-bisphosphate aldolase OS=Malus domestica OX=3750 GN=DVH24_019121 PE=3 SV=1	40.92	0	97.49	GILAADESTGTIGKR			missed K-R@14	-0.0014033	1487.79	744.904	1487.79	744.904	2	9	1.1.1.1911.5	15.2158	8550.12	509.59	15.48	0.24	35.0087
tr|A0A498I550|A0A498I550_MALDO	Fructose-bisphosphate aldolase OS=Malus domestica OX=3750 GN=DVH24_019121 PE=3 SV=1	40.92	0	92.56	GILAADESTGTIGKR			missed K-R@14	-0.00109931	1487.79	496.938	1487.79	496.939	3	10	1.1.1.1908.6	15.1362	59882	565.11	15.46	0.26	164.485
tr|A0A498I550|A0A498I550_MALDO	Fructose-bisphosphate aldolase OS=Malus domestica OX=3750 GN=DVH24_019121 PE=3 SV=1	40.92	0	83.86	GILAADESTGTIGKR			missed K-R@14	-0.00375438	1487.79	496.938	1487.79	496.939	3	9	1.1.1.1958.2	16.2605	1089.51	580.1	16.09	0.33	175.848
tr|A0A498I550|A0A498I550_MALDO	Fructose-bisphosphate aldolase OS=Malus domestica OX=3750 GN=DVH24_019121 PE=3 SV=1	40.92	0	41.26	GILAADESTGTIGKR			missed K-R@14	-0.00109931	1487.79	496.938	1487.79	496.939	3	10	1.1.1.1933.2	15.6949	59882	14426	15.46	0.26	1628.58
tr|A0A498I550|A0A498I550_MALDO	Fructose-bisphosphate aldolase OS=Malus domestica OX=3750 GN=DVH24_019121 PE=3 SV=1	40.92	0	99	GKYADELIANAAYIGTPGK			missed K-Y@2	0.0328021	1951.04	651.353	1951.01	651.342	3	9	1.1.1.2249.14	23.0999	1467.76	1136.14	23.23	0.53	252.013
tr|A0A498I550|A0A498I550_MALDO	Fructose-bisphosphate aldolase OS=Malus domestica OX=3750 GN=DVH24_019121 PE=3 SV=1	40.92	0	99	GKYADELIANAAYIGTPGK			missed K-Y@2	0.0328021	1951.04	651.353	1951.01	651.342	3	10	1.1.1.2250.13	23.1233	1467.76	1197.9	23.23	0.53	253.062
tr|A0A498I550|A0A498I550_MALDO	Fructose-bisphosphate aldolase OS=Malus domestica OX=3750 GN=DVH24_019121 PE=3 SV=1	40.92	0	99	GKYADELIANAAYIGTPGK			missed K-Y@2	0.0324359	1951.04	651.353	1951.01	651.342	3	14	1.1.1.2270.5	23.6013	1167.88	960.56	23.55	0.65	290.725
tr|A0A498I550|A0A498I550_MALDO	Fructose-bisphosphate aldolase OS=Malus domestica OX=3750 GN=DVH24_019121 PE=3 SV=1	40.92	0	51.64	GKYADELIANAAYIGTPGK			missed K-Y@2	0.0322528	1951.04	651.353	1951.01	651.342	3	8	1.1.1.2292.8	24.1421	790.51	330.17	23.93	0.24	214.842
tr|A0A498I550|A0A498I550_MALDO	Fructose-bisphosphate aldolase OS=Malus domestica OX=3750 GN=DVH24_019121 PE=3 SV=1	40.92	0	99	GTVELAGTNGETTTQGLDGLAQR	Deamidated(N)@9; Deamidated(Q)@15; Deamidated(Q)@22			0.0407682	2291.12	764.713	2291.08	764.699	3	15	1.1.1.2159.6	20.9107	2524.63	880.03	20.61	0.26	341.869
tr|A0A498I550|A0A498I550_MALDO	Fructose-bisphosphate aldolase OS=Malus domestica OX=3750 GN=DVH24_019121 PE=3 SV=1	40.92	0	98.93	GTVELAGTNGETTTQGLDGLAQR	Deamidated(N)@9			-0.00082047	2289.11	764.043	2289.11	764.043	3	12	1.1.1.2164.5	21.022	14795.1	367.5	20.59	0.24	239
tr|A0A498I550|A0A498I550_MALDO	Fructose-bisphosphate aldolase OS=Malus domestica OX=3750 GN=DVH24_019121 PE=3 SV=1	40.92	0	98.29	GTVELAGTNGETTTQGLDGLAQR				0.00246403	2288.13	763.716	2288.12	763.715	3	12	1.1.1.2128.5	20.1748	6917.05	1704.12	20.37	0.26	284.809
tr|A0A498I550|A0A498I550_MALDO	Fructose-bisphosphate aldolase OS=Malus domestica OX=3750 GN=DVH24_019121 PE=3 SV=1	40.92	0	89.97	GTVELAGTNGETTTQGLDGLAQR	Deamidated(Q)@15			-0.00082047	2289.11	764.043	2289.11	764.043	3	12	1.1.1.2159.6	20.9107	14795.1	988.85	20.59	0.24	341.869
tr|A0A498I550|A0A498I550_MALDO	Fructose-bisphosphate aldolase OS=Malus domestica OX=3750 GN=DVH24_019121 PE=3 SV=1	40.92	0	43	GTVELAGTNGETTTQGLDGLGER				-0.00929506	2275.08	759.369	2275.09	759.372	3	7	1.1.1.2143.6	20.531	660.54	224.55	20.21	0.47	149.76
tr|A0A498I550|A0A498I550_MALDO	Fructose-bisphosphate aldolase OS=Malus domestica OX=3750 GN=DVH24_019121 PE=3 SV=1	40.92	0	99	IGPNEPSQLSIQENANGLAR	Deamidated(Q)@12; Deamidated(N)@16			0.00476439	2109.04	704.02	2109.03	704.019	3	19	1.1.1.2167.3	21.0963	1820.11	1149.75	20.8	0.38	370.193
tr|A0A498I550|A0A498I550_MALDO	Fructose-bisphosphate aldolase OS=Malus domestica OX=3750 GN=DVH24_019121 PE=3 SV=1	40.92	0	98.62	IGPNEPSQLSIQENANGLAR	Deamidated(N)@14			0.000175608	2108.05	703.691	2108.05	703.691	3	12	1.1.1.2150.18	20.698	13845.8	3645.87	20.37	0.47	430.378
tr|A0A498I550|A0A498I550_MALDO	Fructose-bisphosphate aldolase OS=Malus domestica OX=3750 GN=DVH24_019121 PE=3 SV=1	40.92	0	96.47	IGPNEPSQLSIQENANGLAR	Dimethyl(N)@14; Deamidated(N)@16	Dimethyl(N)@514		0.010339	2136.09	713.038	2136.08	713.034	3	14	1.1.1.2214.8	22.2444	3081.36	2570.98	22.08	0.66	584.635
tr|A0A498I550|A0A498I550_MALDO	Fructose-bisphosphate aldolase OS=Malus domestica OX=3750 GN=DVH24_019121 PE=3 SV=1	40.92	0	96.09	KASPEVIAEYTVR	Delta:H(4)C(2)@N-term		missed K-A@1	-0.000262353	1489.81	497.612	1489.81	497.612	3	11	1.1.1.2121.2	20.0235	1706.46	838.78	20.23	0.5	251.912
tr|A0A498I550|A0A498I550_MALDO	Fructose-bisphosphate aldolase OS=Malus domestica OX=3750 GN=DVH24_019121 PE=3 SV=1	40.92	0	96.09	KASPEVIAEYTVR	Delta:H(4)C(2)(K)@1		missed K-A@1	-0.000262353	1489.81	497.612	1489.81	497.612	3	11	1.1.1.2121.2	20.0235	1706.46	838.78	20.23	0.5	251.912
tr|A0A498I550|A0A498I550_MALDO	Fructose-bisphosphate aldolase OS=Malus domestica OX=3750 GN=DVH24_019121 PE=3 SV=1	40.92	0	79	KASPEVIAEYTVR	Carbamyl@N-term		missed K-A@1	0.0019163	1504.79	753.403	1504.79	753.402	2	9	1.1.1.2163.6	21.0051	2551.46	1007.29	20.8	0.33	162.204
tr|A0A498I550|A0A498I550_MALDO	Fructose-bisphosphate aldolase OS=Malus domestica OX=3750 GN=DVH24_019121 PE=3 SV=1	40.92	0	55.33	KASPEVIAEYTVR			missed K-A@1	0.000163209	1461.78	488.268	1461.78	488.268	3	8	1.1.1.2014.8	17.5479	24232.4	483.71	17.88	0.29	249.914
tr|A0A498I550|A0A498I550_MALDO	Fructose-bisphosphate aldolase OS=Malus domestica OX=3750 GN=DVH24_019121 PE=3 SV=1	40.92	0	41.26	KASPEVIAEYTVR	Dimethyl(K)@1	Dimethyl(K)@589	missed K-A@1	-0.000262353	1489.81	497.612	1489.81	497.612	3	11	1.1.1.2121.2	20.0235	1706.46	838.78	20.23	0.5	251.912
tr|A0A498I550|A0A498I550_MALDO	Fructose-bisphosphate aldolase OS=Malus domestica OX=3750 GN=DVH24_019121 PE=3 SV=1	40.92	0	26.27	KASPEVIAEYTVR	Carbamyl(K)@1		missed K-A@1	0.0019163	1504.79	753.403	1504.79	753.402	2	9	1.1.1.2163.6	21.0051	2551.46	1007.29	20.8	0.33	162.204
tr|A0A498I550|A0A498I550_MALDO	Fructose-bisphosphate aldolase OS=Malus domestica OX=3750 GN=DVH24_019121 PE=3 SV=1	40.92	0	99	KPWSLSF			cleaved N-K@N-term; cleaved F-S@C-term	0.0424523	863.497	432.756	863.454	432.734	2	7	1.1.1.2339.2	25.2661	1433.99	588.21	24.88	0.63	148.112
tr|A0A498I550|A0A498I550_MALDO	Fructose-bisphosphate aldolase OS=Malus domestica OX=3750 GN=DVH24_019121 PE=3 SV=1	40.92	0	87.42	LGEGAAESLHVK				0.00416516	1209.64	404.221	1209.64	404.219	3	8	1.1.1.1859.2	13.9522	40090.8	705.59	14.36	0.26	170.294
tr|A0A498I550|A0A498I550_MALDO	Fructose-bisphosphate aldolase OS=Malus domestica OX=3750 GN=DVH24_019121 PE=3 SV=1	40.92	0	50.92	LGEGAAESLHVK	Delta:H(4)C(2)@N-term			0.000774297	1237.67	413.563	1237.67	413.563	3	10	1.1.1.2000.2	17.2179	8101.83	3112.15	17	0.31	755.184
tr|A0A498I550|A0A498I550_MALDO	Fructose-bisphosphate aldolase OS=Malus domestica OX=3750 GN=DVH24_019121 PE=3 SV=1	40.92	0	41.26	LGEGAAESLHVK				0.00416516	1209.64	404.221	1209.64	404.219	3	7	1.1.1.1901.2	14.9618	40090.8	767.02	14.36	0.26	258.54
tr|A0A498I550|A0A498I550_MALDO	Fructose-bisphosphate aldolase OS=Malus domestica OX=3750 GN=DVH24_019121 PE=3 SV=1	40.92	0	17.1	LGEGAAESLHVK	Methyl(E)@7; Methyl(S)@8	Methyl(E)@349; Methyl(S)@350		0.000774297	1237.67	413.563	1237.67	413.563	3	10	1.1.1.1983.2	16.8416	8101.83	3552.93	17	0.31	640.23
tr|A0A498I550|A0A498I550_MALDO	Fructose-bisphosphate aldolase OS=Malus domestica OX=3750 GN=DVH24_019121 PE=3 SV=1	40.92	0	15.47	LGEGAAESLHVK	Delta:H(4)C(2)(H)@10			0.000774297	1237.67	413.563	1237.67	413.563	3	8	1.1.1.1983.2	16.8416	8101.83	3552.93	17	0.31	640.23
tr|A0A498I550|A0A498I550_MALDO	Fructose-bisphosphate aldolase OS=Malus domestica OX=3750 GN=DVH24_019121 PE=3 SV=1	40.92	0	38.85	SLSFSFGR			cleaved W-S@N-term	0.0418475	899.492	450.753	899.45	450.732	2	5	1.1.1.2224.4	22.4797	25.7839	25.7839			247.515
tr|A0A498I550|A0A498I550_MALDO	Fructose-bisphosphate aldolase OS=Malus domestica OX=3750 GN=DVH24_019121 PE=3 SV=1	40.92	0	99	TASGKPFVDVLK	Carbamyl(K)@5			0.00121101	1303.71	652.865	1303.71	652.864	2	14	1.1.1.2219.8	22.3664	5467.54	5170.72	22.4	0.29	576.639
tr|A0A498I550|A0A498I550_MALDO	Fructose-bisphosphate aldolase OS=Malus domestica OX=3750 GN=DVH24_019121 PE=3 SV=1	40.92	0	99	TASGKPFVDVLK				0.00297986	1260.71	421.244	1260.71	421.243	3	13	1.1.1.2073.2	18.9385	66173.9	13727.3	18.58	0.33	1974.97
tr|A0A498I550|A0A498I550_MALDO	Fructose-bisphosphate aldolase OS=Malus domestica OX=3750 GN=DVH24_019121 PE=3 SV=1	40.92	0	82.33	TASGKPFVDVLK				0.00297986	1260.71	421.244	1260.71	421.243	3	11	1.1.1.2053.3	18.4614	66173.9	37009.2	18.58	0.33	5973.04
tr|A0A498I550|A0A498I550_MALDO	Fructose-bisphosphate aldolase OS=Malus domestica OX=3750 GN=DVH24_019121 PE=3 SV=1	40.92	0	57.33	TASGKPFVDVLK				0.00297986	1260.71	421.244	1260.71	421.243	3	8	1.1.1.2074.2	18.9613	66173.9	11581.6	18.58	0.33	1729.56
tr|A0A498I550|A0A498I550_MALDO	Fructose-bisphosphate aldolase OS=Malus domestica OX=3750 GN=DVH24_019121 PE=3 SV=1	40.92	0	19.46	TASGKPFVDVLK				0.00297986	1260.71	421.244	1260.71	421.243	3	6	1.1.1.2042.2	18.2085	66173.9	478.99	18.58	0.33	419.326
tr|A0A498I550|A0A498I550_MALDO	Fructose-bisphosphate aldolase OS=Malus domestica OX=3750 GN=DVH24_019121 PE=3 SV=1	40.92	0	19.29	TASGKPFVDVLK				-0.000324246	1260.71	631.361	1260.71	631.361	2	7	1.1.1.2079.4	19.0857	20782.8	1633.09	18.58	0.33	693.864
tr|A0A498I550|A0A498I550_MALDO	Fructose-bisphosphate aldolase OS=Malus domestica OX=3750 GN=DVH24_019121 PE=3 SV=1	40.92	0	84.34	VDKGTVELAGTNGETTTQGLDGLAQR	Deamidated(Q)@18		missed K-G@3	-0.000555502	2631.3	658.832	2631.3	658.832	4	8	1.1.1.2087.2	19.2272	2241.08	30.12	19.68	0.36	278.724
tr|A0A498I550|A0A498I550_MALDO	Fructose-bisphosphate aldolase OS=Malus domestica OX=3750 GN=DVH24_019121 PE=3 SV=1	40.92	0	82.85	VLAACYK	Carbamidomethyl(C)@5			-0.000225807	823.426	412.72	823.426	412.72	2	8	1.1.1.1779.2	12.1607	39264.6	1674.44	11.87	0.21	297.927
tr|A0A498I550|A0A498I550_MALDO	Fructose-bisphosphate aldolase OS=Malus domestica OX=3750 GN=DVH24_019121 PE=3 SV=1	40.92	0	22.5	VLKIGPNEPSQLSIQENANGLAR	GG(K)@3; Deamidated(Q)@11	GG(K)@500	cleaved A-V@N-term; missed K-I@3	-0.000449999	2562.34	855.12	2562.34	855.121	3	13	1.1.1.2258.12	23.3181	1153.15	906.3	23.42	0.24	183.576
tr|A0A498I550|A0A498I550_MALDO	Fructose-bisphosphate aldolase OS=Malus domestica OX=3750 GN=DVH24_019121 PE=3 SV=1	40.92	0	99	YADELIANAAYIGTPGK				-0.0727886	1765.82	589.612	1765.89	589.637	3	17	1.1.1.2246.4	23.0256	3843.1	3585.15	23.04	0.32	943.433
tr|A0A498I550|A0A498I550_MALDO	Fructose-bisphosphate aldolase OS=Malus domestica OX=3750 GN=DVH24_019121 PE=3 SV=1	40.92	0	99	YADELIANAAYIGTPGK				0.0427472	1765.93	589.651	1765.89	589.637	3	16	1.1.1.2247.9	23.0467	11443.6	4787.5	23.21	0.29	1022.8
tr|A0A498I550|A0A498I550_MALDO	Fructose-bisphosphate aldolase OS=Malus domestica OX=3750 GN=DVH24_019121 PE=3 SV=1	40.92	0	99	YADELIANAAYIGTPGK				0.0427472	1765.93	589.651	1765.89	589.637	3	16	1.1.1.2248.8	23.0702	11443.6	6248.58	23.21	0.29	1224.1
tr|A0A498I550|A0A498I550_MALDO	Fructose-bisphosphate aldolase OS=Malus domestica OX=3750 GN=DVH24_019121 PE=3 SV=1	40.92	0	99	YADELIANAAYIGTPGK				0.0427472	1765.93	589.651	1765.89	589.637	3	15	1.1.1.2249.11	23.0974	11443.6	8056.36	23.21	0.29	1395.62
tr|A0A498I550|A0A498I550_MALDO	Fructose-bisphosphate aldolase OS=Malus domestica OX=3750 GN=DVH24_019121 PE=3 SV=1	40.92	0	99	YADELIANAAYIGTPGK				0.0427472	1765.93	589.651	1765.89	589.637	3	20	1.1.1.2250.10	23.1208	11443.6	9450.08	23.21	0.29	1474.88
tr|A0A498I550|A0A498I550_MALDO	Fructose-bisphosphate aldolase OS=Malus domestica OX=3750 GN=DVH24_019121 PE=3 SV=1	40.92	0	99	YADELIANAAYIGTPGK				0.0427472	1765.93	589.651	1765.89	589.637	3	21	1.1.1.2251.9	23.1443	11443.6	10532.3	23.21	0.29	1499.92
tr|A0A498I550|A0A498I550_MALDO	Fructose-bisphosphate aldolase OS=Malus domestica OX=3750 GN=DVH24_019121 PE=3 SV=1	40.92	0	99	YADELIANAAYIGTPGK				0.0427472	1765.93	589.651	1765.89	589.637	3	21	1.1.1.2252.10	23.1704	11443.6	11204.4	23.21	0.29	1556.97
tr|A0A498I550|A0A498I550_MALDO	Fructose-bisphosphate aldolase OS=Malus domestica OX=3750 GN=DVH24_019121 PE=3 SV=1	40.92	0	99	YADELIANAAYIGTPGK				0.0427472	1765.93	589.651	1765.89	589.637	3	20	1.1.1.2253.13	23.1982	11443.6	11430.6	23.21	0.29	1553.62
tr|A0A498I550|A0A498I550_MALDO	Fructose-bisphosphate aldolase OS=Malus domestica OX=3750 GN=DVH24_019121 PE=3 SV=1	40.92	0	99	YADELIANAAYIGTPGK				0.0427472	1765.93	589.651	1765.89	589.637	3	19	1.1.1.2254.10	23.2184	11443.6	11262.2	23.21	0.29	1568.59
tr|A0A498I550|A0A498I550_MALDO	Fructose-bisphosphate aldolase OS=Malus domestica OX=3750 GN=DVH24_019121 PE=3 SV=1	40.92	0	99	YADELIANAAYIGTPGK				0.0427472	1765.93	589.651	1765.89	589.637	3	21	1.1.1.2255.7	23.2435	11443.6	10648.2	23.21	0.29	1460.67
tr|A0A498I550|A0A498I550_MALDO	Fructose-bisphosphate aldolase OS=Malus domestica OX=3750 GN=DVH24_019121 PE=3 SV=1	40.92	0	99	YADELIANAAYIGTPGK				0.0427472	1765.93	589.651	1765.89	589.637	3	20	1.1.1.2256.8	23.2654	11443.6	9883.49	23.21	0.29	1374.63
tr|A0A498I550|A0A498I550_MALDO	Fructose-bisphosphate aldolase OS=Malus domestica OX=3750 GN=DVH24_019121 PE=3 SV=1	40.92	0	99	YADELIANAAYIGTPGK				0.0427472	1765.93	589.651	1765.89	589.637	3	22	1.1.1.2257.10	23.2921	11443.6	8818.67	23.21	0.29	1191.9
tr|A0A498I550|A0A498I550_MALDO	Fructose-bisphosphate aldolase OS=Malus domestica OX=3750 GN=DVH24_019121 PE=3 SV=1	40.92	0	99	YADELIANAAYIGTPGK				0.0427472	1765.93	589.651	1765.89	589.637	3	19	1.1.1.2258.4	23.3106	11443.6	8031.46	23.21	0.29	1123.95
tr|A0A498I550|A0A498I550_MALDO	Fructose-bisphosphate aldolase OS=Malus domestica OX=3750 GN=DVH24_019121 PE=3 SV=1	40.92	0	99	YADELIANAAYIGTPGK				0.0427472	1765.93	589.651	1765.89	589.637	3	17	1.1.1.2259.10	23.3396	11443.6	6754.06	23.21	0.29	1017.35
tr|A0A498I550|A0A498I550_MALDO	Fructose-bisphosphate aldolase OS=Malus domestica OX=3750 GN=DVH24_019121 PE=3 SV=1	40.92	0	99	YADELIANAAYIGTPGK				0.0427472	1765.93	589.651	1765.89	589.637	3	16	1.1.1.2260.6	23.3603	11443.6	5774.82	23.21	0.29	858.975
tr|A0A498I550|A0A498I550_MALDO	Fructose-bisphosphate aldolase OS=Malus domestica OX=3750 GN=DVH24_019121 PE=3 SV=1	40.92	0	99	YADELIANAAYIGTPGK				0.0427472	1765.93	589.651	1765.89	589.637	3	14	1.1.1.2261.5	23.3833	11443.6	4755.33	23.21	0.29	793.856
tr|A0A498I550|A0A498I550_MALDO	Fructose-bisphosphate aldolase OS=Malus domestica OX=3750 GN=DVH24_019121 PE=3 SV=1	40.92	0	99	YADELIANAAYIGTPGK				0.0427472	1765.93	589.651	1765.89	589.637	3	13	1.1.1.2263.5	23.4313	11443.6	3079.96	23.21	0.29	697.651
tr|A0A498I550|A0A498I550_MALDO	Fructose-bisphosphate aldolase OS=Malus domestica OX=3750 GN=DVH24_019121 PE=3 SV=1	40.92	0	99	YADELIANAAYIGTPGK				0.0427472	1765.93	589.651	1765.89	589.637	3	19	1.1.1.2264.3	23.4599	11443.6	2379.6	23.21	0.29	531.573

## Sheet: Spot 11
Accession #	Name
tr|A0A498I550|A0A498I550_MALDO	Fructose-bisphosphate aldolase OS=Malus domestica OX=3750 GN=DVH24_019121 PE=3 SV=1
Accessions	Names	%Cov(95)	Contrib	Conf	Sequence	Modifications	ProteinModifications	Cleavages	dMass	Obs MW	Obs m/z	Theor MW	Theor m/z	Theor z	Sc	Spectrum	Acq Time	Intensity (Peptide)	PrecursorIntensityAcquisition	Apex Time (Peptide)	Elution Peak Width (Peptide)	MS2Counts
tr|A0A498I550|A0A498I550_MALDO	Fructose-bisphosphate aldolase OS=Malus domestica OX=3750 GN=DVH24_019121 PE=3 SV=1	30.73	2	99	AKANSEATLGTYKGDAK			missed K-A@2; missed K-G@13	-0.00190156	1723.87	431.975	1723.87	431.976	4	13	1.1.1.1705.3	10.6352	572.47	472.72	10.71	0.28	154.089
tr|A0A498I550|A0A498I550_MALDO	Fructose-bisphosphate aldolase OS=Malus domestica OX=3750 GN=DVH24_019121 PE=3 SV=1	30.73	2	99	ANSEATLGTYK				-0.00136986	1153.56	577.787	1153.56	577.788	2	9	1.1.1.1821.6	12.7241	1145.87	524.05	12.8	0.23	88.4396
tr|A0A498I550|A0A498I550_MALDO	Fructose-bisphosphate aldolase OS=Malus domestica OX=3750 GN=DVH24_019121 PE=3 SV=1	30.73	2	99	AQAALLTR				-8.59995e-05	842.497	422.256	842.497	422.256	2	13	1.1.1.1843.3	13.2264	30936.2	18052.9	13.13	0.19	2790.17
tr|A0A498I550|A0A498I550_MALDO	Fructose-bisphosphate aldolase OS=Malus domestica OX=3750 GN=DVH24_019121 PE=3 SV=1	30.73	2	99	AQEAFLTR				-0.000484686	934.487	468.251	934.487	468.251	2	9	1.1.1.1908.3	14.7493	13383.6	903.83	14.95	0.23	186.275
tr|A0A498I550|A0A498I550_MALDO	Fructose-bisphosphate aldolase OS=Malus domestica OX=3750 GN=DVH24_019121 PE=3 SV=1	30.73	2	99	ASPEVIAEYTVR				2.40366e-05	1333.69	667.851	1333.69	667.851	2	16	1.1.1.2121.3	19.7153	38185.9	1501.51	19.42	0.22	224.312
tr|A0A498I550|A0A498I550_MALDO	Fructose-bisphosphate aldolase OS=Malus domestica OX=3750 GN=DVH24_019121 PE=3 SV=1	30.73	2	99	EGGVLPGIK				0.000919192	868.503	435.259	868.502	435.258	2	12	1.1.1.1991.2	16.6475	70460	14188.7	16.84	0.28	2256
tr|A0A498I550|A0A498I550_MALDO	Fructose-bisphosphate aldolase OS=Malus domestica OX=3750 GN=DVH24_019121 PE=3 SV=1	30.73	2	99	GILAADESTGTIGK				0.00184434	1331.69	444.906	1331.69	444.905	3	19	1.1.1.1986.2	16.5326	1728.35	1675.49	16.5	0.21	679.808
tr|A0A498I550|A0A498I550_MALDO	Fructose-bisphosphate aldolase OS=Malus domestica OX=3750 GN=DVH24_019121 PE=3 SV=1	30.73	2	99	GILAADESTGTIGKR			missed K-R@14	-0.00157025	1487.79	496.938	1487.79	496.939	3	16	1.1.1.1930.4	15.2587	32563.8	5567.08	15.07	0.21	1158.02
tr|A0A498I550|A0A498I550_MALDO	Fructose-bisphosphate aldolase OS=Malus domestica OX=3750 GN=DVH24_019121 PE=3 SV=1	30.73	2	99	GKYADELIANAAYIGTPGK			missed K-Y@2	-0.00158023	1951	651.342	1951.01	651.342	3	11	1.1.1.2231.19	22.3249	3612.71	1707.47	22.53	0.39	303.439
tr|A0A498I550|A0A498I550_MALDO	Fructose-bisphosphate aldolase OS=Malus domestica OX=3750 GN=DVH24_019121 PE=3 SV=1	30.73	2	99	IGPNEPSQLSIQENANGLAR				-0.00397713	2107.06	703.361	2107.07	703.363	3	16	1.1.1.2107.8	19.3802	14281.9	12004.2	19.32	0.24	953.498
tr|A0A498I550|A0A498I550_MALDO	Fructose-bisphosphate aldolase OS=Malus domestica OX=3750 GN=DVH24_019121 PE=3 SV=1	30.73	2	99	TASGKPFVDVLK				0.00126201	1260.71	421.244	1260.71	421.243	3	16	1.1.1.2048.3	17.9748	52761.3	32857.1	18.09	0.21	4704.23
tr|A0A498I550|A0A498I550_MALDO	Fructose-bisphosphate aldolase OS=Malus domestica OX=3750 GN=DVH24_019121 PE=3 SV=1	30.73	2	99	YADELIANAAYIGTPGK				0.000744808	1765.89	589.637	1765.89	589.637	3	19	1.1.1.2254.4	22.8758	10190.7	4542.95	22.75	0.22	915.049
tr|A0A498I550|A0A498I550_MALDO	Fructose-bisphosphate aldolase OS=Malus domestica OX=3750 GN=DVH24_019121 PE=3 SV=1	30.73	1.95861	99	AKANSEATLGTYK			missed K-A@2	-0.00287421	1352.69	451.904	1352.69	451.905	3	8	1.1.1.1758.4	11.2842	443.04	385.11	11.36	0.24	79.6374
tr|A0A498I550|A0A498I550_MALDO	Fructose-bisphosphate aldolase OS=Malus domestica OX=3750 GN=DVH24_019121 PE=3 SV=1	30.73	1.49485	99	VDKGTVELAGTNGETTTQGLDGLAQR	Deamidated(Q)@18		missed K-G@3	-0.00118982	2631.3	658.832	2631.3	658.832	4	11	1.1.1.2091.13	18.9988	842.76	349.17	19.1	0.26	297.122
tr|A0A498I550|A0A498I550_MALDO	Fructose-bisphosphate aldolase OS=Malus domestica OX=3750 GN=DVH24_019121 PE=3 SV=1	30.73	1.25181	96	VLAACYK	Carbamidomethyl(C)@5			-0.000291881	823.426	412.72	823.426	412.72	2	6	1.1.1.1769.2	11.5341	10667.5	486.08	11.72	0.17	70.7917
tr|A0A498I550|A0A498I550_MALDO	Fructose-bisphosphate aldolase OS=Malus domestica OX=3750 GN=DVH24_019121 PE=3 SV=1	30.73	0.954677	91.98	GTVELAGTNGETTTQGLDGLGER				-0.000878221	2275.09	759.371	2275.09	759.372	3	7	1.1.1.2110.10	19.4546	758.37	401.97	19.54	0.17	161.337
tr|A0A498I550|A0A498I550_MALDO	Fructose-bisphosphate aldolase OS=Malus domestica OX=3750 GN=DVH24_019121 PE=3 SV=1	30.73	0.737549	91.34	LGEGAAESLHVK				-0.000267684	1209.64	404.219	1209.64	404.219	3	11	1.1.1.1889.2	14.2981	28168.8	5479.96	14.13	0.2	4848.56
tr|A0A498I550|A0A498I550_MALDO	Fructose-bisphosphate aldolase OS=Malus domestica OX=3750 GN=DVH24_019121 PE=3 SV=1	30.73	0.415669	99	PFVDVLK			cleaved K-P@N-term	0.000144829	816.475	409.245	816.475	409.245	2	11	1.1.1.2130.2	19.8965	1668.65	1662.87	19.89	0.28	494.678
tr|A0A498I550|A0A498I550_MALDO	Fructose-bisphosphate aldolase OS=Malus domestica OX=3750 GN=DVH24_019121 PE=3 SV=1	30.73	0.271646	99	IANAAYIGTPGK			cleaved L-I@N-term	-0.00504197	1174.63	588.322	1174.63	588.325	2	11	1.1.1.1903.5	14.6455	504.56	347.18	14.77	0.23	71.8412
tr|A0A498I550|A0A498I550_MALDO	Fructose-bisphosphate aldolase OS=Malus domestica OX=3750 GN=DVH24_019121 PE=3 SV=1	30.73	0.171985	99	SLSFSFGR			cleaved W-S@N-term	-4.78993e-05	899.45	450.732	899.45	450.732	2	8	1.1.1.2193.5	21.3887	9707.38	8089.44	21.46	0.32	1323.25
tr|A0A498I550|A0A498I550_MALDO	Fructose-bisphosphate aldolase OS=Malus domestica OX=3750 GN=DVH24_019121 PE=3 SV=1	30.73	0.114639	75.43	GTVELAGTNGETTTQGLDGLAQR	Deamidated(Q)@15			0.000722502	2289.11	764.044	2289.11	764.043	3	9	1.1.1.2152.7	20.424	4676.45	427.76	20.15	0.23	188.092
tr|A0A498I550|A0A498I550_MALDO	Fructose-bisphosphate aldolase OS=Malus domestica OX=3750 GN=DVH24_019121 PE=3 SV=1	30.73	0.0273344	97.94	AAYIGTPGK			cleaved N-A@N-term	-0.00170484	876.469	439.242	876.471	439.243	2	7	1.1.1.1781.3	11.7991	250.73	216.24	11.84	0.31	73.8402
tr|A0A498I550|A0A498I550_MALDO	Fructose-bisphosphate aldolase OS=Malus domestica OX=3750 GN=DVH24_019121 PE=3 SV=1	30.73	0.0109954	87.11	LSGVILFEETLYQK			cleaved Y-L@N-term	0.00806468	1638.9	820.455	1638.89	820.451	2	8	1.1.1.2501.3	28.8488	295.53	210.45	28.68	0.35	74.3773
tr|A0A498I550|A0A498I550_MALDO	Fructose-bisphosphate aldolase OS=Malus domestica OX=3750 GN=DVH24_019121 PE=3 SV=1	30.73	0.00744649	15.29	TTPAAVPAVVFLSGGQSEEEATLNLNAMNQLK	Deamidated(Q)@16; Oxidation(M)@28			0.0156131	3316.67	830.174	3316.65	830.17	4	8	1.1.1.2509.8	29.0283	2131.41	730.4	28.63	0.42	125.983
tr|A0A498I550|A0A498I550_MALDO	Fructose-bisphosphate aldolase OS=Malus domestica OX=3750 GN=DVH24_019121 PE=3 SV=1	30.73	0.00656376	99	FASINVENVESNR	Dimethyl(N)@8	Dimethyl(N)@399		-0.00112043	1505.75	753.88	1505.75	753.881	2	9	1.1.1.2219.12	22.0249	3723.93	2111.27	22.11	0.22	211.083
tr|A0A498I550|A0A498I550_MALDO	Fructose-bisphosphate aldolase OS=Malus domestica OX=3750 GN=DVH24_019121 PE=3 SV=1	30.73	0.00217692	63.32	KAQEAFLTR	Carbamyl@N-term		missed K-A@1	0.00265319	1105.59	553.803	1105.59	553.801	2	7	1.1.1.1956.7	15.8664	899.33	658.6	15.78	0.32	88.5522
tr|A0A498I550|A0A498I550_MALDO	Fructose-bisphosphate aldolase OS=Malus domestica OX=3750 GN=DVH24_019121 PE=3 SV=1	30.73	0	49.21	AADESTGTIGKR	Dicarbamidomethyl(D)@3		cleaved L-A@N-term; missed K-R@11	0.0429855	1318.69	660.353	1318.65	660.331	2	9	1.1.1.1924.5	15.1324	381.89	371.71	15.07	0.18	362.416
tr|A0A498I550|A0A498I550_MALDO	Fructose-bisphosphate aldolase OS=Malus domestica OX=3750 GN=DVH24_019121 PE=3 SV=1	30.73	0	99	AQAALLTR				-8.59995e-05	842.497	422.256	842.497	422.256	2	12	1.1.1.1838.3	13.1081	30936.2	29912.3	13.13	0.19	3404.49
tr|A0A498I550|A0A498I550_MALDO	Fructose-bisphosphate aldolase OS=Malus domestica OX=3750 GN=DVH24_019121 PE=3 SV=1	30.73	0	99	AQAALLTR	Deamidated(Q)@2			0.00107567	843.482	422.748	843.481	422.748	2	12	1.1.1.1865.4	13.7458	7575.06	1392	13.93	0.25	380.382
tr|A0A498I550|A0A498I550_MALDO	Fructose-bisphosphate aldolase OS=Malus domestica OX=3750 GN=DVH24_019121 PE=3 SV=1	30.73	0	99	ASPEVIAEYTVR				2.40366e-05	1333.69	667.851	1333.69	667.851	2	14	1.1.1.2100.19	19.216	38185.9	4561.62	19.42	0.22	567.713
tr|A0A498I550|A0A498I550_MALDO	Fructose-bisphosphate aldolase OS=Malus domestica OX=3750 GN=DVH24_019121 PE=3 SV=1	30.73	0	92.69	ASPEVIAEYTVR	Delta:H(4)C(2)@N-term			-0.000877519	1361.72	681.866	1361.72	681.867	2	8	1.1.1.2229.11	22.2692	4091.68	2650.44	22.11	0.34	338.872
tr|A0A498I550|A0A498I550_MALDO	Fructose-bisphosphate aldolase OS=Malus domestica OX=3750 GN=DVH24_019121 PE=3 SV=1	30.73	0	50.73	ASPEVIAEYTVR	Delta:H(4)C(2)@N-term			0.00068115	1361.72	454.914	1361.72	454.914	3	8	1.1.1.2222.3	22.0909	711.13	640.88	22.13	0.32	578.158
tr|A0A498I550|A0A498I550_MALDO	Fructose-bisphosphate aldolase OS=Malus domestica OX=3750 GN=DVH24_019121 PE=3 SV=1	30.73	0	99	EGGVLPGIK	Glu->pyro-Glu@N-term			9.10109e-05	850.491	426.253	850.491	426.253	2	11	1.1.1.2135.2	20.0134	3154.41	721.45	20.17	0.26	364.421
tr|A0A498I550|A0A498I550_MALDO	Fructose-bisphosphate aldolase OS=Malus domestica OX=3750 GN=DVH24_019121 PE=3 SV=1	30.73	0	96.22	EGGVLPGIK				0.000919192	868.503	435.259	868.502	435.258	2	8	1.1.1.2014.3	17.1673	70460	5029.32	16.84	0.28	1038.39
tr|A0A498I550|A0A498I550_MALDO	Fructose-bisphosphate aldolase OS=Malus domestica OX=3750 GN=DVH24_019121 PE=3 SV=1	30.73	0	27.41	FASINVENVESNR				0.00175338	1477.72	493.58	1477.72	493.579	3	6	1.1.1.2063.7	18.3282	2967.19	1237.94	18.44	0.19	425.98
tr|A0A498I550|A0A498I550_MALDO	Fructose-bisphosphate aldolase OS=Malus domestica OX=3750 GN=DVH24_019121 PE=3 SV=1	30.73	0	26.02	FASINVENVESNR				0.00271295	1477.72	739.867	1477.72	739.865	2	7	1.1.1.2077.12	18.674	10874.6	1098.59	18.44	0.22	275.682
tr|A0A498I550|A0A498I550_MALDO	Fructose-bisphosphate aldolase OS=Malus domestica OX=3750 GN=DVH24_019121 PE=3 SV=1	30.73	0	23.13	FASINVENVESNR	Dimethyl(R)@13	Dimethyl(R)@404		-0.00112043	1505.75	753.88	1505.75	753.881	2	8	1.1.1.2219.12	22.0249	3723.93	2111.27	22.11	0.22	211.083
tr|A0A498I550|A0A498I550_MALDO	Fructose-bisphosphate aldolase OS=Malus domestica OX=3750 GN=DVH24_019121 PE=3 SV=1	30.73	0	99	GILAADESTGTIGK				1.60151e-05	1331.69	666.854	1331.69	666.854	2	22	1.1.1.1976.4	16.3096	27549.2	2557.9	16.5	0.19	294.735
tr|A0A498I550|A0A498I550_MALDO	Fructose-bisphosphate aldolase OS=Malus domestica OX=3750 GN=DVH24_019121 PE=3 SV=1	30.73	0	99	GILAADESTGTIGK				1.60151e-05	1331.69	666.854	1331.69	666.854	2	17	1.1.1.1999.5	16.8312	27549.2	828.33	16.5	0.19	118.769
tr|A0A498I550|A0A498I550_MALDO	Fructose-bisphosphate aldolase OS=Malus domestica OX=3750 GN=DVH24_019121 PE=3 SV=1	30.73	0	99	GILAADESTGTIGKR			missed K-R@14	0.00135959	1487.8	744.905	1487.79	744.904	2	12	1.1.1.1916.10	14.9482	5545.59	1674.08	15.07	0.16	107.593
tr|A0A498I550|A0A498I550_MALDO	Fructose-bisphosphate aldolase OS=Malus domestica OX=3750 GN=DVH24_019121 PE=3 SV=1	30.73	0	99	GKYADELIANAAYIGTPGK			missed K-Y@2	-0.00158023	1951	651.342	1951.01	651.342	3	11	1.1.1.2228.8	22.248	3612.71	706.02	22.53	0.39	223.857
tr|A0A498I550|A0A498I550_MALDO	Fructose-bisphosphate aldolase OS=Malus domestica OX=3750 GN=DVH24_019121 PE=3 SV=1	30.73	0	36.44	GTVELAGTNGETTTQGLDGLAQR	Deamidated(N)@9			0.0120752	2289.12	764.047	2289.11	764.043	3	7	1.1.1.2070.8	18.5081	277.71	199.98	18.46	0.19	80.8559
tr|A0A498I550|A0A498I550_MALDO	Fructose-bisphosphate aldolase OS=Malus domestica OX=3750 GN=DVH24_019121 PE=3 SV=1	30.73	0	22.5	KAQEAFLTR	Carbamyl(K)@1		missed K-A@1	0.00265319	1105.59	553.803	1105.59	553.801	2	7	1.1.1.1956.7	15.8664	899.33	658.6	15.78	0.32	88.5522
tr|A0A498I550|A0A498I550_MALDO	Fructose-bisphosphate aldolase OS=Malus domestica OX=3750 GN=DVH24_019121 PE=3 SV=1	30.73	0	37.16	KASPEVIAEYTVR	Dimethyl(R)@13	Dimethyl(R)@601	missed K-A@1	0.00200046	1489.82	497.613	1489.81	497.612	3	7	1.1.1.2106.6	19.3502	1499.15	727.11	19.56	0.31	288.696
tr|A0A498I550|A0A498I550_MALDO	Fructose-bisphosphate aldolase OS=Malus domestica OX=3750 GN=DVH24_019121 PE=3 SV=1	30.73	0	91.94	PAAVPAVVFLSGGQSEEEATLNLNAMNQLK	HexNAc(S)@11; Oxidation(M)@26	HexNAc(S)@618	cleaved T-P@N-term	0.015613	3316.67	830.174	3316.65	830.17	4	11	1.1.1.2509.8	29.0283	2131.41	730.4	28.63	0.42	125.983
tr|A0A498I550|A0A498I550_MALDO	Fructose-bisphosphate aldolase OS=Malus domestica OX=3750 GN=DVH24_019121 PE=3 SV=1	30.73	0	91.94	PAAVPAVVFLSGGQSEEEATLNLNAMNQLK	HexNAc(S)@15; Oxidation(M)@26	HexNAc(S)@622	cleaved T-P@N-term	0.015613	3316.67	830.174	3316.65	830.17	4	11	1.1.1.2509.8	29.0283	2131.41	730.4	28.63	0.42	125.983
tr|A0A498I550|A0A498I550_MALDO	Fructose-bisphosphate aldolase OS=Malus domestica OX=3750 GN=DVH24_019121 PE=3 SV=1	30.73	0	42.98	PAAVPAVVFLSGGQSEEEATLNLNAMNQLK	HexNAc(T)@20; Oxidation(M)@26	HexNAc(T)@627	cleaved T-P@N-term	0.015613	3316.67	830.174	3316.65	830.17	4	11	1.1.1.2509.8	29.0283	2131.41	730.4	28.63	0.42	125.983
tr|A0A498I550|A0A498I550_MALDO	Fructose-bisphosphate aldolase OS=Malus domestica OX=3750 GN=DVH24_019121 PE=3 SV=1	30.73	0	15.54	PAAVPAVVFLSGGQSEEEATLNLNAMNQLK	HexNAc(N)@22; Oxidation(M)@26	HexNAc(N)@629	cleaved T-P@N-term	0.015613	3316.67	830.174	3316.65	830.17	4	10	1.1.1.2509.8	29.0283	2131.41	730.4	28.63	0.42	125.983
tr|A0A498I550|A0A498I550_MALDO	Fructose-bisphosphate aldolase OS=Malus domestica OX=3750 GN=DVH24_019121 PE=3 SV=1	30.73	0	99	TASGKPFVDVLK				0.00126201	1260.71	421.244	1260.71	421.243	3	15	1.1.1.2053.3	18.0889	52761.3	52384.8	18.09	0.21	7054.18
tr|A0A498I550|A0A498I550_MALDO	Fructose-bisphosphate aldolase OS=Malus domestica OX=3750 GN=DVH24_019121 PE=3 SV=1	30.73	0	99	TASGKPFVDVLK				0.00126201	1260.71	421.244	1260.71	421.243	3	13	1.1.1.2046.2	17.9255	52761.3	17159.7	18.09	0.21	2454.45
tr|A0A498I550|A0A498I550_MALDO	Fructose-bisphosphate aldolase OS=Malus domestica OX=3750 GN=DVH24_019121 PE=3 SV=1	30.73	0	99	TASGKPFVDVLK				0.00126201	1260.71	421.244	1260.71	421.243	3	14	1.1.1.2052.3	18.0653	52761.3	51815.6	18.09	0.21	7223.19
tr|A0A498I550|A0A498I550_MALDO	Fructose-bisphosphate aldolase OS=Malus domestica OX=3750 GN=DVH24_019121 PE=3 SV=1	30.73	0	99	TASGKPFVDVLK				0.00126201	1260.71	421.244	1260.71	421.243	3	14	1.1.1.2054.4	18.1132	52761.3	49617.2	18.09	0.21	6857.62
tr|A0A498I550|A0A498I550_MALDO	Fructose-bisphosphate aldolase OS=Malus domestica OX=3750 GN=DVH24_019121 PE=3 SV=1	30.73	0	99	TASGKPFVDVLK				0.00126201	1260.71	421.244	1260.71	421.243	3	13	1.1.1.2055.5	18.1372	52761.3	44914.9	18.09	0.21	5926.56
tr|A0A498I550|A0A498I550_MALDO	Fructose-bisphosphate aldolase OS=Malus domestica OX=3750 GN=DVH24_019121 PE=3 SV=1	30.73	0	99	TASGKPFVDVLK				0.00126201	1260.71	421.244	1260.71	421.243	3	14	1.1.1.2047.2	17.9515	52761.3	24799.3	18.09	0.21	3550.64
tr|A0A498I550|A0A498I550_MALDO	Fructose-bisphosphate aldolase OS=Malus domestica OX=3750 GN=DVH24_019121 PE=3 SV=1	30.73	0	99	TASGKPFVDVLK				0.00126201	1260.71	421.244	1260.71	421.243	3	14	1.1.1.2049.2	17.9956	52761.3	39470.5	18.09	0.21	5442.18
tr|A0A498I550|A0A498I550_MALDO	Fructose-bisphosphate aldolase OS=Malus domestica OX=3750 GN=DVH24_019121 PE=3 SV=1	30.73	0	99	TASGKPFVDVLK				0.00126201	1260.71	421.244	1260.71	421.243	3	14	1.1.1.2051.4	18.0439	52761.3	50363.1	18.09	0.21	7188.85
tr|A0A498I550|A0A498I550_MALDO	Fructose-bisphosphate aldolase OS=Malus domestica OX=3750 GN=DVH24_019121 PE=3 SV=1	30.73	0	99	TASGKPFVDVLK				0.00126201	1260.71	421.244	1260.71	421.243	3	12	1.1.1.2045.2	17.903	52761.3	11577.2	18.09	0.21	1822.18
tr|A0A498I550|A0A498I550_MALDO	Fructose-bisphosphate aldolase OS=Malus domestica OX=3750 GN=DVH24_019121 PE=3 SV=1	30.73	0	99	TASGKPFVDVLK				0.00126201	1260.71	421.244	1260.71	421.243	3	12	1.1.1.2050.2	18.0179	52761.3	45552.4	18.09	0.21	6242.97
tr|A0A498I550|A0A498I550_MALDO	Fructose-bisphosphate aldolase OS=Malus domestica OX=3750 GN=DVH24_019121 PE=3 SV=1	30.73	0	93.51	TASGKPFVDVLK				0.00126201	1260.71	421.244	1260.71	421.243	3	9	1.1.1.2043.2	17.8556	52761.3	4202.21	18.09	0.21	754.205
tr|A0A498I550|A0A498I550_MALDO	Fructose-bisphosphate aldolase OS=Malus domestica OX=3750 GN=DVH24_019121 PE=3 SV=1	30.73	0	88.09	TASGKPFVDVLK				0.00126201	1260.71	421.244	1260.71	421.243	3	12	1.1.1.2051.5	18.0456	52761.3	50482.1	18.09	0.21	7865.02
tr|A0A498I550|A0A498I550_MALDO	Fructose-bisphosphate aldolase OS=Malus domestica OX=3750 GN=DVH24_019121 PE=3 SV=1	30.73	0	50.73	TASGKPFVDVLK	Carbamyl(K)@5			-0.000373911	1303.71	652.864	1303.71	652.864	2	8	1.1.1.2213.7	21.8744	3589.42	3015.79	21.94	0.27	351.316
tr|A0A498I550|A0A498I550_MALDO	Fructose-bisphosphate aldolase OS=Malus domestica OX=3750 GN=DVH24_019121 PE=3 SV=1	30.73	0	93.51	VDKGTVELAGTNGETTTQGLDGLAQR			missed K-G@3	0.0040553	2630.32	658.587	2630.31	658.586	4	8	1.1.1.2084.9	18.8351	453.18	210.04	18.94	0.16	147.343
tr|A0A498I550|A0A498I550_MALDO	Fructose-bisphosphate aldolase OS=Malus domestica OX=3750 GN=DVH24_019121 PE=3 SV=1	30.73	0	54.04	VLAACYK	Carbamidomethyl(C)@5			-0.000291881	823.426	412.72	823.426	412.72	2	6	1.1.1.1794.2	12.0955	10667.5	172.32	11.72	0.17	78.8441
tr|A0A498I550|A0A498I550_MALDO	Fructose-bisphosphate aldolase OS=Malus domestica OX=3750 GN=DVH24_019121 PE=3 SV=1	30.73	0	99	YADELIANAAYIGTPGK				0.000744808	1765.89	589.637	1765.89	589.637	3	16	1.1.1.2252.13	22.8322	10190.7	6671.14	22.75	0.22	1132.64
tr|A0A498I550|A0A498I550_MALDO	Fructose-bisphosphate aldolase OS=Malus domestica OX=3750 GN=DVH24_019121 PE=3 SV=1	30.73	0	99	YADELIANAAYIGTPGK				0.000744808	1765.89	589.637	1765.89	589.637	3	17	1.1.1.2253.4	22.849	10190.7	5822.78	22.75	0.22	1052.88
tr|A0A498I550|A0A498I550_MALDO	Fructose-bisphosphate aldolase OS=Malus domestica OX=3750 GN=DVH24_019121 PE=3 SV=1	30.73	0	99	YADELIANAAYIGTPGK				0.000744808	1765.89	589.637	1765.89	589.637	3	14	1.1.1.2255.6	22.8992	10190.7	3491.22	22.75	0.22	928.292
tr|A0A498I550|A0A498I550_MALDO	Fructose-bisphosphate aldolase OS=Malus domestica OX=3750 GN=DVH24_019121 PE=3 SV=1	30.73	0	99	YADELIANAAYIGTPGK				0.000744808	1765.89	589.637	1765.89	589.637	3	12	1.1.1.2256.6	22.9233	10190.7	2569.2	22.75	0.22	861.273
tr|A0A498I550|A0A498I550_MALDO	Fructose-bisphosphate aldolase OS=Malus domestica OX=3750 GN=DVH24_019121 PE=3 SV=1	30.73	0	25.98	YADELIANAAYIGTPGK	Deamidated(N)@8			0.00935339	1766.88	589.968	1766.87	589.965	3	5	1.1.1.2207.8	21.7296	191.39	148.83	21.77	0.05	158.607

## Sheet: Spot 13
Accession #	Name
tr|A0A498ICU4|A0A498ICU4_MALDO	Glyceraldehyde-3-phosphate dehydrogenase OS=Malus domestica OX=3750 GN=DVH24_041002 PE=3 SV=1
Accessions	Names	%Cov(95)	Contrib	Conf	Sequence	Modifications	ProteinModifications	Cleavages	dMass	Obs MW	Obs m/z	Theor MW	Theor m/z	Theor z	Sc	Spectrum	Acq Time	Intensity (Peptide)	PrecursorIntensityAcquisition	Apex Time (Peptide)	Elution Peak Width (Peptide)	MS2Counts
tr|A0A498ICU4|A0A498ICU4_MALDO	Glyceraldehyde-3-phosphate dehydrogenase OS=Malus domestica OX=3750 GN=DVH24_041002 PE=3 SV=1	80.35	2	99	AASFNIIPSSTGAAK				0.00260184	1433.75	717.884	1433.75	717.883	2	14	1.1.1.2144.2	20.8805	872141	4126.87	19.99	0.28	363.983
tr|A0A498ICU4|A0A498ICU4_MALDO	Glyceraldehyde-3-phosphate dehydrogenase OS=Malus domestica OX=3750 GN=DVH24_041002 PE=3 SV=1	80.35	2	99	DDVELVAVNDPFITTDYMTYMFK	Oxidation(M)@18; Oxidation(M)@21			-0.000424815	2758.24	690.567	2758.24	690.567	4	13	1.1.1.2495.3	29.0056	540.58	472.68	29.02	0.11	239.755
tr|A0A498ICU4|A0A498ICU4_MALDO	Glyceraldehyde-3-phosphate dehydrogenase OS=Malus domestica OX=3750 GN=DVH24_041002 PE=3 SV=1	80.35	2	99	FGIVEGLMTTVHSITATQK	Oxidation(M)@8			-0.00192709	2048.06	683.694	2048.06	683.694	3	18	1.1.1.2233.13	22.9746	6270.33	2347.85	23.13	0.32	657.401
tr|A0A498ICU4|A0A498ICU4_MALDO	Glyceraldehyde-3-phosphate dehydrogenase OS=Malus domestica OX=3750 GN=DVH24_041002 PE=3 SV=1	80.35	2	99	GILGYTEDDVVSTDFIGDSR				0.000279834	2158.01	720.343	2158.01	720.343	3	14	1.1.1.2424.8	27.3225	2608.29	1274.77	26.9	0.45	188.605
tr|A0A498ICU4|A0A498ICU4_MALDO	Glyceraldehyde-3-phosphate dehydrogenase OS=Malus domestica OX=3750 GN=DVH24_041002 PE=3 SV=1	80.35	2	99	LKGILGYTEDDVVSTDFIGDSR			missed K-G@2	-0.00280116	2399.18	800.735	2399.19	800.736	3	14	1.1.1.2338.6	25.4376	11267.3	1949.99	25.63	0.33	168.751
tr|A0A498ICU4|A0A498ICU4_MALDO	Glyceraldehyde-3-phosphate dehydrogenase OS=Malus domestica OX=3750 GN=DVH24_041002 PE=3 SV=1	80.35	2	99	NPEEIPWGECGADFVVESTGVFTDKEK	Carbamidomethyl(C)@10		missed K-E@25	0.00167942	3039.38	760.853	3039.38	760.852	4	12	1.1.1.2492.2	28.9289	1638.3	544.08	28.72	0.27	101.264
tr|A0A498ICU4|A0A498ICU4_MALDO	Glyceraldehyde-3-phosphate dehydrogenase OS=Malus domestica OX=3750 GN=DVH24_041002 PE=3 SV=1	80.35	2	99	TLLFGEKPVTVFGIR				0.00260983	1675.97	559.663	1675.97	559.663	3	24	1.1.1.2385.2	26.4309	75165.2	9836.06	26.79	0.29	1959.69
tr|A0A498ICU4|A0A498ICU4_MALDO	Glyceraldehyde-3-phosphate dehydrogenase OS=Malus domestica OX=3750 GN=DVH24_041002 PE=3 SV=1	80.35	2	99	VIISAPSKDAPMFVVGVNEK			missed K-D@8	-0.0025339	2100.13	701.049	2100.13	701.05	3	19	1.1.1.2244.9	23.2439	18540.1	9679.08	23.06	0.32	830.35
tr|A0A498ICU4|A0A498ICU4_MALDO	Glyceraldehyde-3-phosphate dehydrogenase OS=Malus domestica OX=3750 GN=DVH24_041002 PE=3 SV=1	80.35	2	99	VPTVDVSVVDLTVR				0.00191994	1497.84	749.928	1497.84	749.927	2	22	1.1.1.2368.4	26.0952	184.549	184.549			2194.74
tr|A0A498ICU4|A0A498ICU4_MALDO	Glyceraldehyde-3-phosphate dehydrogenase OS=Malus domestica OX=3750 GN=DVH24_041002 PE=3 SV=1	80.35	2	99	VVDLIVHVASTL				-0.00195282	1264.74	633.376	1264.74	633.377	2	14	1.1.1.3602.2	37.8812	649.03	288.48	38.13	0.58	46.5842
tr|A0A498ICU4|A0A498ICU4_MALDO	Glyceraldehyde-3-phosphate dehydrogenase OS=Malus domestica OX=3750 GN=DVH24_041002 PE=3 SV=1	80.35	2	99	YDTVHGPWK				-0.000501609	1101.52	551.769	1101.52	551.769	2	14	1.1.1.1907.3	15.424	39884.3	12237.8	15.2	0.31	931.721
tr|A0A498ICU4|A0A498ICU4_MALDO	Glyceraldehyde-3-phosphate dehydrogenase OS=Malus domestica OX=3750 GN=DVH24_041002 PE=3 SV=1	80.35	1.95861	99	AGIALNDTFVK	Deamidated(N)@6			0.00386601	1148.61	575.313	1148.61	575.311	2	16	1.1.1.2166.7	21.3502	45466.1	44509.5	21.37	0.43	4155.51
tr|A0A498ICU4|A0A498ICU4_MALDO	Glyceraldehyde-3-phosphate dehydrogenase OS=Malus domestica OX=3750 GN=DVH24_041002 PE=3 SV=1	80.35	1.95861	99	LAKPASYDQIK				0.0013419	1232.68	411.9	1232.68	411.899	3	12	1.1.1.1824.3	13.4937	514636	3212.92	12.83	0.19	583.967
tr|A0A498ICU4|A0A498ICU4_MALDO	Glyceraldehyde-3-phosphate dehydrogenase OS=Malus domestica OX=3750 GN=DVH24_041002 PE=3 SV=1	80.35	1.79588	99	FGIVEGLMTTVH			cleaved H-S@C-term	0.00111429	1302.67	652.34	1302.66	652.339	2	17	1.1.1.2411.8	27.0087	6296.65	4609.94	26.88	0.33	703.629
tr|A0A498ICU4|A0A498ICU4_MALDO	Glyceraldehyde-3-phosphate dehydrogenase OS=Malus domestica OX=3750 GN=DVH24_041002 PE=3 SV=1	80.35	1.79588	99	TVDGPSQKDWR	Deamidated(Q)@7		missed K-D@8	-0.00207669	1288.6	645.309	1288.6	645.31	2	13	1.1.1.1800.4	12.9672	1537.45	1523.83	12.95	0.28	186.63
tr|A0A498ICU4|A0A498ICU4_MALDO	Glyceraldehyde-3-phosphate dehydrogenase OS=Malus domestica OX=3750 GN=DVH24_041002 PE=3 SV=1	80.35	1.58503	97.71	LTGMAFR	Oxidation(M)@4			-0.00103463	810.405	406.21	810.406	406.21	2	10	1.1.1.1785.2	12.6237	178998	11775.7	12.34	0.21	1645.78
tr|A0A498ICU4|A0A498ICU4_MALDO	Glyceraldehyde-3-phosphate dehydrogenase OS=Malus domestica OX=3750 GN=DVH24_041002 PE=3 SV=1	80.35	1.52288	97.55	AAIKEESEGKLK			missed K-E@4; missed K-L@10	-0.00151506	1301.72	434.913	1301.72	434.914	3	11	1.1.1.1558.2	9.42728	15103.9	2559.08	9.15	0.22	268.029
tr|A0A498ICU4|A0A498ICU4_MALDO	Glyceraldehyde-3-phosphate dehydrogenase OS=Malus domestica OX=3750 GN=DVH24_041002 PE=3 SV=1	80.35	1.4437	98	VIISAPSK				-0.000633518	813.495	407.755	813.496	407.755	2	10	1.1.1.1819.2	13.3747	417926	6245.42	12.97	0.21	1160.03
tr|A0A498ICU4|A0A498ICU4_MALDO	Glyceraldehyde-3-phosphate dehydrogenase OS=Malus domestica OX=3750 GN=DVH24_041002 PE=3 SV=1	80.35	1.3098	99	TLLFGEKPVTVF			cleaved F-G@C-term	0.000547777	1349.76	675.887	1349.76	675.887	2	17	1.1.1.2420.5	27.2183	14575.1	7340.43	27.38	0.36	686.037
tr|A0A498ICU4|A0A498ICU4_MALDO	Glyceraldehyde-3-phosphate dehydrogenase OS=Malus domestica OX=3750 GN=DVH24_041002 PE=3 SV=1	80.35	1.29243	98.88	IGINGFGR	Deamidated(N)@4			0.00236086	833.442	417.728	833.44	417.727	2	11	1.1.1.2085.3	19.5219	246580	9382.8	19.02	0.33	1720.87
tr|A0A498ICU4|A0A498ICU4_MALDO	Glyceraldehyde-3-phosphate dehydrogenase OS=Malus domestica OX=3750 GN=DVH24_041002 PE=3 SV=1	80.35	1.22915	99	VVDLIVHVA			cleaved A-S@C-term	0.00205376	963.577	482.796	963.575	482.795	2	11	1.1.1.2205.2	22.2811	1186.34	923.68	22.11	0.46	140.696
tr|A0A498ICU4|A0A498ICU4_MALDO	Glyceraldehyde-3-phosphate dehydrogenase OS=Malus domestica OX=3750 GN=DVH24_041002 PE=3 SV=1	80.35	1.11351	99	AASFNIIPSSTGAAKAVGK	Carbamyl(K)@15		missed K-A@15	0.00250332	1831.98	611.668	1831.98	611.667	3	23	1.1.1.2184.15	21.7831	36524	33648.6	21.84	0.31	4233.22
tr|A0A498ICU4|A0A498ICU4_MALDO	Glyceraldehyde-3-phosphate dehydrogenase OS=Malus domestica OX=3750 GN=DVH24_041002 PE=3 SV=1	80.35	1.10791	93.02	LTGMAFRVPTVDVSVVDLTVR	Oxidation(M)@4		missed R-V@7	0.00077193	2290.24	764.419	2290.24	764.419	3	12	1.1.1.2438.5	27.6576	1134.36	517.38	27.57	0.33	202.379
tr|A0A498ICU4|A0A498ICU4_MALDO	Glyceraldehyde-3-phosphate dehydrogenase OS=Malus domestica OX=3750 GN=DVH24_041002 PE=3 SV=1	80.35	1.02228	98.07	VLPALNGK	Deamidated(N)@6			-0.000621591	811.48	406.747	811.48	406.747	2	12	1.1.1.1903.2	15.3249	364537	133821	15.18	0.21	22274.8
tr|A0A498ICU4|A0A498ICU4_MALDO	Glyceraldehyde-3-phosphate dehydrogenase OS=Malus domestica OX=3750 GN=DVH24_041002 PE=3 SV=1	80.35	0.995679	99	VLPALNGKLTGMAFR	Carbamyl(K)@8; Oxidation(M)@12		missed K-L@8	-0.00248163	1645.89	823.955	1645.9	823.956	2	16	1.1.1.2304.17	24.6928	6951.17	5684.27	24.63	0.24	436.364
tr|A0A498ICU4|A0A498ICU4_MALDO	Glyceraldehyde-3-phosphate dehydrogenase OS=Malus domestica OX=3750 GN=DVH24_041002 PE=3 SV=1	80.35	0.906578	91.85	EYKPDIHILSNASCTTNCLAPLAK	Carbamidomethyl(C)@14; Carbamidomethyl(C)@18			0.00366933	2715.34	679.842	2715.34	679.841	4	7	1.1.1.2204.12	22.2644	8753.02	5678.28	22.11	0.34	439.874
tr|A0A498ICU4|A0A498ICU4_MALDO	Glyceraldehyde-3-phosphate dehydrogenase OS=Malus domestica OX=3750 GN=DVH24_041002 PE=3 SV=1	80.35	0.540608	99	DAPMFVVGVNEK	Delta:H(4)C(2)(K)@12			-0.00217862	1332.67	667.344	1332.67	667.345	2	17	1.1.1.2297.8	24.5218	6630.66	3124.6	24.68	0.29	448.4
tr|A0A498ICU4|A0A498ICU4_MALDO	Glyceraldehyde-3-phosphate dehydrogenase OS=Malus domestica OX=3750 GN=DVH24_041002 PE=3 SV=1	80.35	0.510041	99	VALQRDDVELVAVND			cleaved D-P@C-term; missed R-D@5	0.00318607	1654.86	828.435	1654.85	828.434	2	15	1.1.1.2117.3	20.2723	2158.39	1108.03	20.37	0.19	160.336
tr|A0A498ICU4|A0A498ICU4_MALDO	Glyceraldehyde-3-phosphate dehydrogenase OS=Malus domestica OX=3750 GN=DVH24_041002 PE=3 SV=1	80.35	0.429457	98.97	PASYDQIK			cleaved K-P@N-term	-0.00185131	920.458	461.236	920.46	461.237	2	12	1.1.1.1765.4	12.1682	20758.4	3680.69	11.97	0.19	430.24
tr|A0A498ICU4|A0A498ICU4_MALDO	Glyceraldehyde-3-phosphate dehydrogenase OS=Malus domestica OX=3750 GN=DVH24_041002 PE=3 SV=1	80.35	0.267606	99	ASCTTNCLAPLAK	Carbamidomethyl(C)@3; Carbamidomethyl(C)@7		cleaved N-A@N-term	-0.00113106	1405.67	703.841	1405.67	703.842	2	14	1.1.1.1926.5	15.8344	1904.79	763.54	16	0.25	81.4866
tr|A0A498ICU4|A0A498ICU4_MALDO	Glyceraldehyde-3-phosphate dehydrogenase OS=Malus domestica OX=3750 GN=DVH24_041002 PE=3 SV=1	80.35	0.0877779	91.05	LVSWYDNEWGYSTR	Oxidation(W)@4			0.00240012	1790.79	597.938	1790.79	597.937	3	7	1.1.1.2238.6	23.0926	1578.45	1270.37	22.91	0.44	215.011
tr|A0A498ICU4|A0A498ICU4_MALDO	Glyceraldehyde-3-phosphate dehydrogenase OS=Malus domestica OX=3750 GN=DVH24_041002 PE=3 SV=1	80.35	0.0574959	98.82	KVIISAPSK	Carbamyl@N-term		missed K-V@1	-0.00184377	984.595	493.305	984.597	493.306	2	12	1.1.1.1858.9	14.2992	40235.2	36286	14.33	0.19	3883.57
tr|A0A498ICU4|A0A498ICU4_MALDO	Glyceraldehyde-3-phosphate dehydrogenase OS=Malus domestica OX=3750 GN=DVH24_041002 PE=3 SV=1	80.35	0.0560111	99	IKIGINGFGR	Carbamyl@N-term; Deamidated(N)@6		missed K-I@2	0.000111603	1117.62	559.819	1117.62	559.819	2	12	1.1.1.2222.7	22.6998	16649.7	12592	22.89	0.44	1097.16
tr|A0A498ICU4|A0A498ICU4_MALDO	Glyceraldehyde-3-phosphate dehydrogenase OS=Malus domestica OX=3750 GN=DVH24_041002 PE=3 SV=1	80.35	0.0525663	99	APMFVVGVNEK			cleaved D-A@N-term	0.00516012	1189.62	595.818	1189.62	595.816	2	14	1.1.1.2111.3	20.1418	1845.45	1249.33	20.21	0.31	183.301
tr|A0A498ICU4|A0A498ICU4_MALDO	Glyceraldehyde-3-phosphate dehydrogenase OS=Malus domestica OX=3750 GN=DVH24_041002 PE=3 SV=1	80.35	0.047692	99	VIISAPSKD			cleaved D-A@C-term; missed K-D@8	-0.00201726	928.521	465.268	928.523	465.269	2	13	1.1.1.1820.3	13.4057	5929.63	2399.68	13.28	0.16	404.127
tr|A0A498ICU4|A0A498ICU4_MALDO	Glyceraldehyde-3-phosphate dehydrogenase OS=Malus domestica OX=3750 GN=DVH24_041002 PE=3 SV=1	80.35	0.0428718	82.23	PVTVFGIR			cleaved K-P@N-term	0.00215285	887.525	444.77	887.523	444.769	2	7	1.1.1.2178.2	21.6284	4321.62	1052.5	21.25	0.33	226.275
tr|A0A498ICU4|A0A498ICU4_MALDO	Glyceraldehyde-3-phosphate dehydrogenase OS=Malus domestica OX=3750 GN=DVH24_041002 PE=3 SV=1	80.35	0.0385789	95.56	DDVELVAVND			cleaved D-P@C-term	0.0050217	1087.51	544.761	1087.5	544.759	2	9	1.1.1.2059.5	18.9373	580.37	399.41	19.05	0.38	131.582
tr|A0A498ICU4|A0A498ICU4_MALDO	Glyceraldehyde-3-phosphate dehydrogenase OS=Malus domestica OX=3750 GN=DVH24_041002 PE=3 SV=1	80.35	0.0305841	99	DVVSTDFIGDSR			cleaved D-D@N-term	0.00238967	1309.62	655.816	1309.61	655.815	2	12	1.1.1.2077.9	19.3415	3366.13	1527.86	19.49	0.29	227.405
tr|A0A498ICU4|A0A498ICU4_MALDO	Glyceraldehyde-3-phosphate dehydrogenase OS=Malus domestica OX=3750 GN=DVH24_041002 PE=3 SV=1	80.35	0.0282604	98.43	SSIFDAKAGIALNDTFVK	Carbamyl(K)@7		missed K-A@7	-0.00384666	1939	647.341	1939.01	647.342	3	13	1.1.1.2423.6	27.2924	3276.23	1333.25	27.45	0.24	1313.99
tr|A0A498ICU4|A0A498ICU4_MALDO	Glyceraldehyde-3-phosphate dehydrogenase OS=Malus domestica OX=3750 GN=DVH24_041002 PE=3 SV=1	80.35	0.025028	98.63	NIIPSSTGAAK			cleaved F-N@N-term	-0.00248046	1057.57	529.794	1057.58	529.796	2	12	1.1.1.1822.7	13.4536	13841.7	13704.5	13.44	0.23	1183.23
tr|A0A498ICU4|A0A498ICU4_MALDO	Glyceraldehyde-3-phosphate dehydrogenase OS=Malus domestica OX=3750 GN=DVH24_041002 PE=3 SV=1	80.35	0.0181814	96.83	SFNIIPSSTGAAK			cleaved A-S@N-term	-0.000269749	1291.68	646.846	1291.68	646.846	2	10	1.1.1.2108.4	20.076	5529.42	706.71	19.66	0.24	210.775
tr|A0A498ICU4|A0A498ICU4_MALDO	Glyceraldehyde-3-phosphate dehydrogenase OS=Malus domestica OX=3750 GN=DVH24_041002 PE=3 SV=1	80.35	0.0177288	67.85	TLLFGEK			cleaved K-P@C-term	0.000687326	806.454	404.235	806.454	404.234	2	7	1.1.1.2055.2	18.8359	4408.86	1304.86	18.52	0.33	394.726
tr|A0A498ICU4|A0A498ICU4_MALDO	Glyceraldehyde-3-phosphate dehydrogenase OS=Malus domestica OX=3750 GN=DVH24_041002 PE=3 SV=1	80.35	0.00788852	42.63	FGIVEGLM	Oxidation(M)@8		cleaved M-T@C-term	0.00716358	880.444	441.229	880.436	441.225	2	5	1.1.1.2254.2	23.4717	345.6	179.11	23.42	0.27	291.694
tr|A0A498ICU4|A0A498ICU4_MALDO	Glyceraldehyde-3-phosphate dehydrogenase OS=Malus domestica OX=3750 GN=DVH24_041002 PE=3 SV=1	80.35	0.00700489	98.72	KVIISAPSKD			cleaved D-A@C-term; missed K-V@1; missed K-D@9	-0.00382922	1056.61	529.314	1056.62	529.316	2	10	1.1.1.1752.2	11.8942	507.8	466.79	11.9	0.16	62.6765
tr|A0A498ICU4|A0A498ICU4_MALDO	Glyceraldehyde-3-phosphate dehydrogenase OS=Malus domestica OX=3750 GN=DVH24_041002 PE=3 SV=1	80.35	0.00656376	98.84	AVGKVLPALNGK	Carbamyl(K)@4; Deamidated(N)@10		missed K-V@4	0.000761963	1209.71	605.862	1209.71	605.861	2	16	1.1.1.2111.4	20.1459	9036.9	4954.34	19.97	0.3	633.172
tr|A0A498ICU4|A0A498ICU4_MALDO	Glyceraldehyde-3-phosphate dehydrogenase OS=Malus domestica OX=3750 GN=DVH24_041002 PE=3 SV=1	80.35	0.00568285	83.29	FVVGVNEK			cleaved M-F@N-term	-0.00230574	890.484	446.249	890.486	446.25	2	8	1.1.1.1895.2	15.1723	1634.91	833.09	15.02	0.21	312.558
tr|A0A498ICU4|A0A498ICU4_MALDO	Glyceraldehyde-3-phosphate dehydrogenase OS=Malus domestica OX=3750 GN=DVH24_041002 PE=3 SV=1	80.35	0.00261361	87.11	TVDVSVVDLTVR			cleaved P-T@N-term	-0.00224656	1301.72	651.866	1301.72	651.867	2	5	1.1.1.2217.12	22.5819	2115.32	724	22.81	0.46	163.855
tr|A0A498ICU4|A0A498ICU4_MALDO	Glyceraldehyde-3-phosphate dehydrogenase OS=Malus domestica OX=3750 GN=DVH24_041002 PE=3 SV=1	80.35	0.00217692	84.6	LVSWYDNEWGY			cleaved Y-S@C-term	-4.88418e-05	1430.61	716.314	1430.61	716.314	2	8	1.1.1.2455.3	28.0314	1144.3	552.81	28.18	0.38	150.697
tr|A0A498ICU4|A0A498ICU4_MALDO	Glyceraldehyde-3-phosphate dehydrogenase OS=Malus domestica OX=3750 GN=DVH24_041002 PE=3 SV=1	80.35	0.00217692	70.21	VSWYDNEWGYSTR			cleaved L-V@N-term	-4.05419e-05	1661.71	831.863	1661.71	831.863	2	6	1.1.1.2243.11	23.2205	820.92	266.52	23.49	0.38	81.1747
tr|A0A498ICU4|A0A498ICU4_MALDO	Glyceraldehyde-3-phosphate dehydrogenase OS=Malus domestica OX=3750 GN=DVH24_041002 PE=3 SV=1	80.35	0.000869447	93.45	GILGYTEDDVVSTD			cleaved D-F@C-term	0.00171076	1482.67	742.344	1482.67	742.344	2	11	1.1.1.2195.6	22.0465	1485.85	408.49	22.25	0.36	152.122
tr|A0A498ICU4|A0A498ICU4_MALDO	Glyceraldehyde-3-phosphate dehydrogenase OS=Malus domestica OX=3750 GN=DVH24_041002 PE=3 SV=1	80.35	0.000434506	73.11	AASFNIIPSSTG			cleaved G-A@C-term	0.00292239	1163.59	582.8	1163.58	582.798	2	7	1.1.1.2205.4	22.2861	1693.93	1456.98	22.4	0.46	223.538
tr|A0A498ICU4|A0A498ICU4_MALDO	Glyceraldehyde-3-phosphate dehydrogenase OS=Malus domestica OX=3750 GN=DVH24_041002 PE=3 SV=1	80.35	0.000434506	57.02	FGIVEGLMTTVHSITATQKTVDGPSQK	Carbamyl(K)@19		missed K-T@19	0.0106504	2887.49	722.879	2887.47	722.876	4	7	1.1.1.2546.6	30.0725	1346.53	1024.2	30.09	0.07	260.409
tr|A0A498ICU4|A0A498ICU4_MALDO	Glyceraldehyde-3-phosphate dehydrogenase OS=Malus domestica OX=3750 GN=DVH24_041002 PE=3 SV=1	80.35	0.000434506	92.11	GILGYTED			cleaved D-D@C-term	-0.00324311	866.399	434.207	866.402	434.208	2	9	1.1.1.2076.5	19.3114	589.98	479.54	19.37	0.4	261.389
tr|A0A498ICU4|A0A498ICU4_MALDO	Glyceraldehyde-3-phosphate dehydrogenase OS=Malus domestica OX=3750 GN=DVH24_041002 PE=3 SV=1	80.35	0	54.86	AAIKEESEGK	Carbamyl(K)@4; Delta:H(4)C(2)(K)@10		missed K-E@4	-0.00207027	1131.58	566.795	1131.58	566.796	2	9	1.1.1.1780.3	12.5166	1346.95	825.65	12.62	0.35	95.2237
tr|A0A498ICU4|A0A498ICU4_MALDO	Glyceraldehyde-3-phosphate dehydrogenase OS=Malus domestica OX=3750 GN=DVH24_041002 PE=3 SV=1	80.35	0	23.34	AAIKEESEGK	Carbamyl(K)@4; Dimethyl(K)@10	Dimethyl(K)@275	missed K-E@4	-0.00207027	1131.58	566.795	1131.58	566.796	2	9	1.1.1.1780.3	12.5166	1346.95	825.65	12.62	0.35	95.2237
tr|A0A498ICU4|A0A498ICU4_MALDO	Glyceraldehyde-3-phosphate dehydrogenase OS=Malus domestica OX=3750 GN=DVH24_041002 PE=3 SV=1	80.35	0	96.72	AAIKEESEGKLK			missed K-E@4; missed K-L@10	-0.00389545	1301.71	434.912	1301.72	434.914	3	10	1.1.1.1613.2	9.93387	634.77	596.96	10	0.52	78.0692
tr|A0A498ICU4|A0A498ICU4_MALDO	Glyceraldehyde-3-phosphate dehydrogenase OS=Malus domestica OX=3750 GN=DVH24_041002 PE=3 SV=1	80.35	0	84.31	AAIKEESEGKLK			missed K-E@4; missed K-L@10	-0.00151506	1301.72	434.913	1301.72	434.914	3	8	1.1.1.1490.2	8.92492	15103.9	787.04	9.15	0.22	71.0725
tr|A0A498ICU4|A0A498ICU4_MALDO	Glyceraldehyde-3-phosphate dehydrogenase OS=Malus domestica OX=3750 GN=DVH24_041002 PE=3 SV=1	80.35	0	76.76	AAIKEESEGKLK	Carbamyl(K)@10		missed K-E@4; missed K-L@10	-0.00499066	1344.72	449.247	1344.72	449.249	3	9	1.1.1.1734.2	11.4967	17871.3	1201.63	11.68	0.17	149.841
tr|A0A498ICU4|A0A498ICU4_MALDO	Glyceraldehyde-3-phosphate dehydrogenase OS=Malus domestica OX=3750 GN=DVH24_041002 PE=3 SV=1	80.35	0	76.09	AAIKEESEGKLK	Carbamyl(K)@4		missed K-E@4; missed K-L@10	-0.00233561	1344.72	449.248	1344.72	449.249	3	11	1.1.1.1757.5	12.0105	8701.05	3804.42	12.11	0.19	480.347
tr|A0A498ICU4|A0A498ICU4_MALDO	Glyceraldehyde-3-phosphate dehydrogenase OS=Malus domestica OX=3750 GN=DVH24_041002 PE=3 SV=1	80.35	0	18.5	AAIKEESEGKLK			missed K-E@4; missed K-L@10	-0.00151506	1301.72	434.913	1301.72	434.914	3	7	1.1.1.1491.2	8.94917	15103.9	1685.04	9.15	0.22	216.653
tr|A0A498ICU4|A0A498ICU4_MALDO	Glyceraldehyde-3-phosphate dehydrogenase OS=Malus domestica OX=3750 GN=DVH24_041002 PE=3 SV=1	80.35	0	99	AASFNIIPSSTGAAK	Deamidated(N)@5			0.00284746	1434.74	718.376	1434.74	718.375	2	18	1.1.1.2070.4	19.1786	4273.72	4095.31	19.14	0.26	444.214
tr|A0A498ICU4|A0A498ICU4_MALDO	Glyceraldehyde-3-phosphate dehydrogenase OS=Malus domestica OX=3750 GN=DVH24_041002 PE=3 SV=1	80.35	0	99	AASFNIIPSSTGAAK				0.00260184	1433.75	717.884	1433.75	717.883	2	16	1.1.1.2092.16	19.703	872141	4986.29	19.99	0.28	336.453
tr|A0A498ICU4|A0A498ICU4_MALDO	Glyceraldehyde-3-phosphate dehydrogenase OS=Malus domestica OX=3750 GN=DVH24_041002 PE=3 SV=1	80.35	0	99	AASFNIIPSSTGAAK				0.00260184	1433.75	717.884	1433.75	717.883	2	26	1.1.1.2115.3	20.2253	872141	342190	19.99	0.28	25228.8
tr|A0A498ICU4|A0A498ICU4_MALDO	Glyceraldehyde-3-phosphate dehydrogenase OS=Malus domestica OX=3750 GN=DVH24_041002 PE=3 SV=1	80.35	0	92.34	AASFNIIPSSTGAAK				0.00256701	1433.75	717.884	1433.75	717.883	2	7	1.1.1.2190.10	21.93	1119.33	860.61	21.79	0.58	156.389
tr|A0A498ICU4|A0A498ICU4_MALDO	Glyceraldehyde-3-phosphate dehydrogenase OS=Malus domestica OX=3750 GN=DVH24_041002 PE=3 SV=1	80.35	0	91.56	AASFNIIPSSTGAAK				0.00100461	1433.75	478.925	1433.75	478.924	3	12	1.1.1.2128.2	20.4975	89488.5	3336.68	19.99	0.31	1880.39
tr|A0A498ICU4|A0A498ICU4_MALDO	Glyceraldehyde-3-phosphate dehydrogenase OS=Malus domestica OX=3750 GN=DVH24_041002 PE=3 SV=1	80.35	0	65.53	AASFNIIPSSTGAAK				0.0013463	1433.75	717.884	1433.75	717.883	2	5	1.1.1.2257.10	23.5497	498.74	358.36	23.52	0.21	101.934
tr|A0A498ICU4|A0A498ICU4_MALDO	Glyceraldehyde-3-phosphate dehydrogenase OS=Malus domestica OX=3750 GN=DVH24_041002 PE=3 SV=1	80.35	0	94.17	AASFNIIPSSTGAAKAVGK	Carbamyl(K)@15		missed K-A@15	0.00527267	1831.98	611.669	1831.98	611.667	3	17	1.1.1.2182.12	21.7323	36524	26839.9	21.84	0.31	5746.9
tr|A0A498ICU4|A0A498ICU4_MALDO	Glyceraldehyde-3-phosphate dehydrogenase OS=Malus domestica OX=3750 GN=DVH24_041002 PE=3 SV=1	80.35	0	83.29	AASFNIIPSSTGAAKAVGK	Carbamidomethyl(K)@15		missed K-A@15	4.86347e-05	1845.99	616.339	1845.99	616.339	3	11	1.1.1.2097.11	19.8198	8388.88	2456.25	19.57	0.31	474.388
tr|A0A498ICU4|A0A498ICU4_MALDO	Glyceraldehyde-3-phosphate dehydrogenase OS=Malus domestica OX=3750 GN=DVH24_041002 PE=3 SV=1	80.35	0	99	AGIALNDTFVK				0.00227828	1147.63	574.82	1147.62	574.819	2	14	1.1.1.2097.9	19.8164	15451.5	7384.56	19.9	0.16	695.383
tr|A0A498ICU4|A0A498ICU4_MALDO	Glyceraldehyde-3-phosphate dehydrogenase OS=Malus domestica OX=3750 GN=DVH24_041002 PE=3 SV=1	80.35	0	99	AGIALNDTFVK				0.00044721	1147.62	574.819	1147.62	574.819	2	18	1.1.1.2120.3	20.3344	1011879	23663.1	20.65	0.4	1586.62
tr|A0A498ICU4|A0A498ICU4_MALDO	Glyceraldehyde-3-phosphate dehydrogenase OS=Malus domestica OX=3750 GN=DVH24_041002 PE=3 SV=1	80.35	0	98.1	AGIALNDTFVK				0.00157773	1147.63	574.82	1147.62	574.819	2	7	1.1.1.2209.7	22.3822	1939.9	1771.3	22.33	0.37	177.448
tr|A0A498ICU4|A0A498ICU4_MALDO	Glyceraldehyde-3-phosphate dehydrogenase OS=Malus domestica OX=3750 GN=DVH24_041002 PE=3 SV=1	80.35	0	97.24	AGIALNDTFVK				0.00044721	1147.62	574.819	1147.62	574.819	2	19	1.1.1.2143.3	20.849	1011879	506210	20.65	0.4	35785.4
tr|A0A498ICU4|A0A498ICU4_MALDO	Glyceraldehyde-3-phosphate dehydrogenase OS=Malus domestica OX=3750 GN=DVH24_041002 PE=3 SV=1	80.35	0	96.55	AGIALNDTFVK				0.000845302	1147.62	574.82	1147.62	574.819	2	7	1.1.1.2230.5	22.8931	1528.86	1132.6	22.57	0.9	149.162
tr|A0A498ICU4|A0A498ICU4_MALDO	Glyceraldehyde-3-phosphate dehydrogenase OS=Malus domestica OX=3750 GN=DVH24_041002 PE=3 SV=1	80.35	0	71.69	AGIALNDTFVK				0.000601161	1147.62	574.819	1147.62	574.819	2	5	1.1.1.2251.6	23.4072	1070.38	748.99	23.2	0.36	111.061
tr|A0A498ICU4|A0A498ICU4_MALDO	Glyceraldehyde-3-phosphate dehydrogenase OS=Malus domestica OX=3750 GN=DVH24_041002 PE=3 SV=1	80.35	0	53.44	AGIALNDTFVK	Ammonia-loss(N)@6			0.000135743	1130.6	566.306	1130.6	566.306	2	6	1.1.1.2233.10	22.9704	2868.66	688.63	22.57	0.44	157.558
tr|A0A498ICU4|A0A498ICU4_MALDO	Glyceraldehyde-3-phosphate dehydrogenase OS=Malus domestica OX=3750 GN=DVH24_041002 PE=3 SV=1	80.35	0	42.63	AGIALNDTFVK	Deamidated(N)@6; Dehydrated(T)@8	Dehydrated(T)@312		0.000135743	1130.6	566.306	1130.6	566.306	2	6	1.1.1.2233.10	22.9704	2868.66	688.63	22.57	0.44	157.558
tr|A0A498ICU4|A0A498ICU4_MALDO	Glyceraldehyde-3-phosphate dehydrogenase OS=Malus domestica OX=3750 GN=DVH24_041002 PE=3 SV=1	80.35	0	27.83	AGIALNDTFVK	Deamidated(N)@6; Dehydrated(D)@7			0.000135743	1130.6	566.306	1130.6	566.306	2	6	1.1.1.2233.10	22.9704	2868.66	688.63	22.57	0.44	157.558
tr|A0A498ICU4|A0A498ICU4_MALDO	Glyceraldehyde-3-phosphate dehydrogenase OS=Malus domestica OX=3750 GN=DVH24_041002 PE=3 SV=1	80.35	0	59.32	AKAGIALNDTFVK	Lys-add@N-term		cleaved D-A@N-term; missed K-A@2	0.00531297	1474.86	738.435	1474.85	738.433	2	8	1.1.1.2130.3	20.5482	674.16	315.74	20.63	0.14	158.95
tr|A0A498ICU4|A0A498ICU4_MALDO	Glyceraldehyde-3-phosphate dehydrogenase OS=Malus domestica OX=3750 GN=DVH24_041002 PE=3 SV=1	80.35	0	36.08	ALNGKLTGMAFR	Deamidated(N)@3; Methyl(K)@5	Methyl(K)@233	cleaved P-A@N-term; missed K-L@5	-0.0119403	1292.68	647.347	1292.69	647.353	2	7	1.1.1.1957.5	16.553	1861.23	561.66	16.74	0.26	160.849
tr|A0A498ICU4|A0A498ICU4_MALDO	Glyceraldehyde-3-phosphate dehydrogenase OS=Malus domestica OX=3750 GN=DVH24_041002 PE=3 SV=1	80.35	0	98.41	APMFVVGVNEK	Oxidation(M)@3		cleaved D-A@N-term	0.000971705	1205.61	603.813	1205.61	603.813	2	11	1.1.1.2011.10	17.8226	3027.87	950.88	18.04	0.32	141.496
tr|A0A498ICU4|A0A498ICU4_MALDO	Glyceraldehyde-3-phosphate dehydrogenase OS=Malus domestica OX=3750 GN=DVH24_041002 PE=3 SV=1	80.35	0	97.24	AVGKVLPALNGK	Carbamyl(K)@4; Deamidated(N)@10		missed K-V@4	0.00247096	1209.71	605.862	1209.71	605.861	2	14	1.1.1.2089.6	19.6279	32142	17560	19.47	0.31	1590.39
tr|A0A498ICU4|A0A498ICU4_MALDO	Glyceraldehyde-3-phosphate dehydrogenase OS=Malus domestica OX=3750 GN=DVH24_041002 PE=3 SV=1	80.35	0	96.49	AVGKVLPALNGK	Formyl(K)@4; Deamidated(N)@10		missed K-V@4	6.82891e-05	1194.7	598.356	1194.7	598.356	2	11	1.1.1.2090.6	19.6535	865.01	825.96	19.66	0.26	363.859
tr|A0A498ICU4|A0A498ICU4_MALDO	Glyceraldehyde-3-phosphate dehydrogenase OS=Malus domestica OX=3750 GN=DVH24_041002 PE=3 SV=1	80.35	0	96.12	AVGKVLPALNGK	Carbamidomethyl(K)@4; Deamidated(N)@10		missed K-V@4	-0.000957333	1223.72	408.915	1223.72	408.915	3	13	1.1.1.1928.2	15.867	4184.96	890.23	16.12	0.3	762.419
tr|A0A498ICU4|A0A498ICU4_MALDO	Glyceraldehyde-3-phosphate dehydrogenase OS=Malus domestica OX=3750 GN=DVH24_041002 PE=3 SV=1	80.35	0	86.18	AVGKVLPALNGK	Carbamyl(K)@4; Deamidated(N)@10		missed K-V@4	0.00547676	1209.71	404.245	1209.71	404.243	3	12	1.1.1.2078.2	19.3542	13219.2	8115.39	19.47	0.31	3470.62
tr|A0A498ICU4|A0A498ICU4_MALDO	Glyceraldehyde-3-phosphate dehydrogenase OS=Malus domestica OX=3750 GN=DVH24_041002 PE=3 SV=1	80.35	0	78.71	AVGKVLPALNGK	Hydroxytrimethyl(K)@4; Deamidated(N)@10	Hydroxytrimethyl(K)@225	missed K-V@4	-0.0247991	1225.73	613.871	1225.75	613.883	2	8	1.1.1.1913.3	15.5471	2678.06	1080.16	15.67	0.19	293.779
tr|A0A498ICU4|A0A498ICU4_MALDO	Glyceraldehyde-3-phosphate dehydrogenase OS=Malus domestica OX=3750 GN=DVH24_041002 PE=3 SV=1	80.35	0	16.42	AVGKVLPALNGK	Carbamyl@N-term; Deamidated(N)@10		missed K-V@4	0.00273016	1209.71	404.244	1209.71	404.243	3	7	1.1.1.2099.2	19.8545	2427.17	1239.94	19.99	0.4	665.167
tr|A0A498ICU4|A0A498ICU4_MALDO	Glyceraldehyde-3-phosphate dehydrogenase OS=Malus domestica OX=3750 GN=DVH24_041002 PE=3 SV=1	80.35	0	93.85	CLAPLAKVINDR	Carbamidomethyl(C)@1; Carbamyl(K)@7		cleaved N-C@N-term; missed K-V@7	0.00217849	1411.76	706.889	1411.76	706.888	2	8	1.1.1.2286.6	24.255	662.92	362.09	24.46	0.41	75.9582
tr|A0A498ICU4|A0A498ICU4_MALDO	Glyceraldehyde-3-phosphate dehydrogenase OS=Malus domestica OX=3750 GN=DVH24_041002 PE=3 SV=1	80.35	0	92.11	DAKAGIALNDTFVK	Delta:H(4)C(2)(K)@3		cleaved F-D@N-term; missed K-A@3	0.016281	1489.83	745.922	1489.81	745.914	2	10	1.1.1.2145.6	20.9031	1768.09	1069.19	20.84	0.23	128.97
tr|A0A498ICU4|A0A498ICU4_MALDO	Glyceraldehyde-3-phosphate dehydrogenase OS=Malus domestica OX=3750 GN=DVH24_041002 PE=3 SV=1	80.35	0	92.11	DAKAGIALNDTFVK	Delta:H(4)C(2)@N-term		cleaved F-D@N-term; missed K-A@3	0.016281	1489.83	745.922	1489.81	745.914	2	10	1.1.1.2145.6	20.9031	1768.09	1069.19	20.84	0.23	128.97
tr|A0A498ICU4|A0A498ICU4_MALDO	Glyceraldehyde-3-phosphate dehydrogenase OS=Malus domestica OX=3750 GN=DVH24_041002 PE=3 SV=1	80.35	0	73.99	DAKAGIALNDTFVK	Delta:H(4)C(2)(K)@3		cleaved F-D@N-term; missed K-A@3	0.016281	1489.83	745.922	1489.81	745.914	2	10	1.1.1.2141.2	20.7995	1768.09	1587.76	20.84	0.23	74.5336
[truncated: 210 more rows]

[truncated: 9 more sheets: Spot 14, Spot 15, Spot 16, Spot 17, Spot 18, Spot 19, Spot 20, Spot 21, Spot 23]
