# Supplementary material for: Immunoproteomic profile of Malus domestica in Mexican pediatric patients. Evidence of new allergen prospects
Source: Royal Society of Chemistry journal article supplement (doi:10.1039/d4fo00064a), 2024-01-01
Supplement: d4fo00064a2.pdf [file d4fo00064a2.pdf]

## IMMUNOPROTEOMIC PROFILE OF *Malus domestica* IN MEXICAN PEDIATRIC PATIENTS. EVIDENCE OF NEW ALLERGEN PROSPECTS

Angélica Torres-Arroyo, Carla Toledo-Salinas, Juan Martínez-Aguilar, Alberto Fernández-Molina, Aramiz López-Duran, Sara T. Méndez, David Alejandro Mendoza-Hernández\*, Horacio Reyes-Vivas\*

| <b>Table S1.</b> Employed oligonucleotides to amplify the apple genes* |                                           |                |             |
|------------------------------------------------------------------------|-------------------------------------------|----------------|-------------|
| <b>GENE</b>                                                            | <b>Oligonucleotides</b>                   | <b>Tm (°C)</b> | <b>Size</b> |
| Mal d 1                                                                | Fw: 5' <b>GCCATATGGGTGTCTACACATTTGA</b>   | 57             | 480 nt      |
|                                                                        | Rv: 5' <b>CCTCGAGGTTGTATGCGTCGGGG</b> 3'  | 57             |             |
| GAPDH                                                                  | Fw: 5' <b>GCCATATGGCAACATCTGGCAAGA</b> 3' | 57             | 1,030 nt    |
|                                                                        | Rv: 5' <b>GCCTCGAGGAGGGTGGATGCTAC</b> 3'  | 57             |             |
| Annexin                                                                | Fw: 5' <b>GCCATATGGCGAGTTGCAGGG</b> 3'    | 57             | 955 nt      |
|                                                                        | Rv: 5' <b>GCCTCGAGAGCATCTGCATGTC</b> 3'   | 57             |             |

\*All oligonucleotides contain restriction sites to clone into a pTWIN 1 vector. *NdeI* for oligo Fw and *XhoI* for oligo Rv. The restriction sites in oligos are marked in bold.

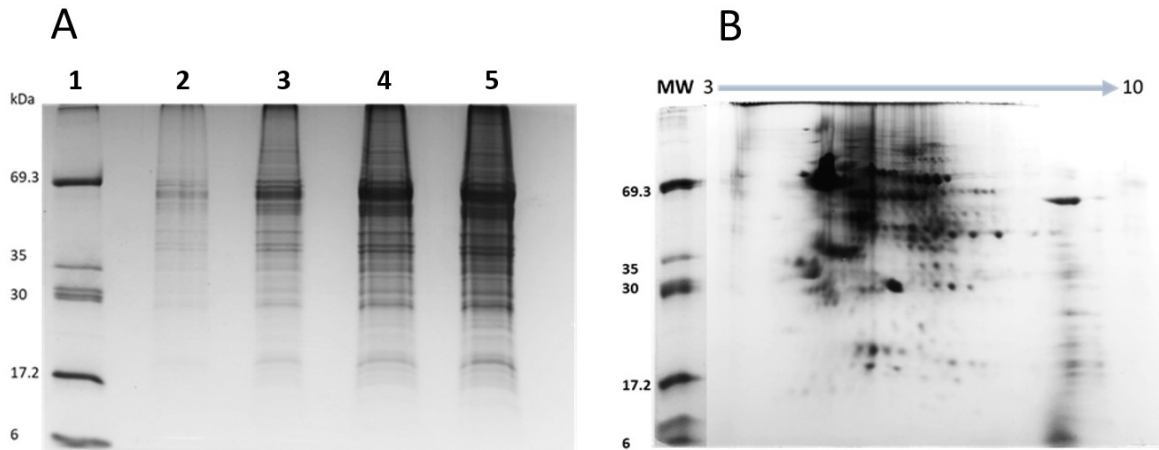

**Figure S1.** (A) SDS-PAGE of apple extracts. Lanes: (1) MW markers; (2) 5  $\mu$ g of apple extract; (3) 15  $\mu$ g of apple extract; (4) 25  $\mu$ g of apple extract; (5) 50  $\mu$ g of apple extract. (B) 2D-SDS-PAGE of apple extract. The gels were stained by colloidal Coomassie.

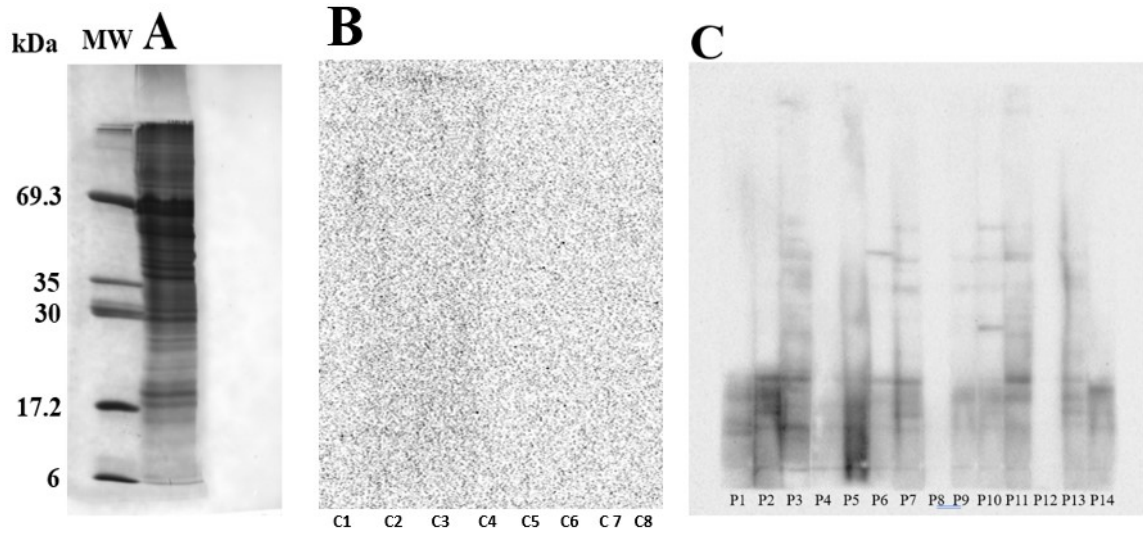

**Figure S2.** Raw Data from Figure 2 showing separately panels A, B, and C.

**A**

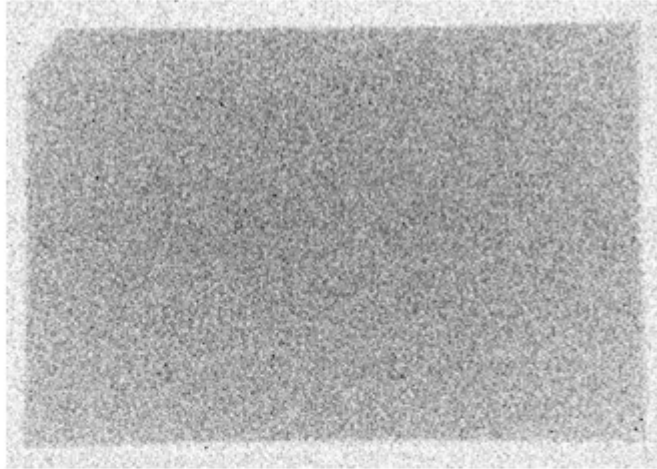

**B**

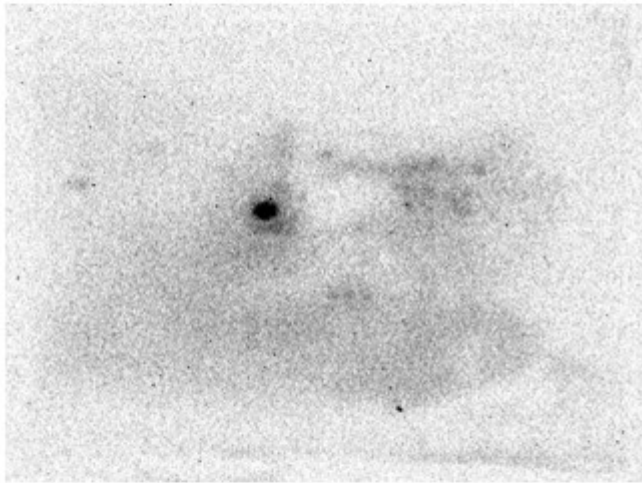

**C**

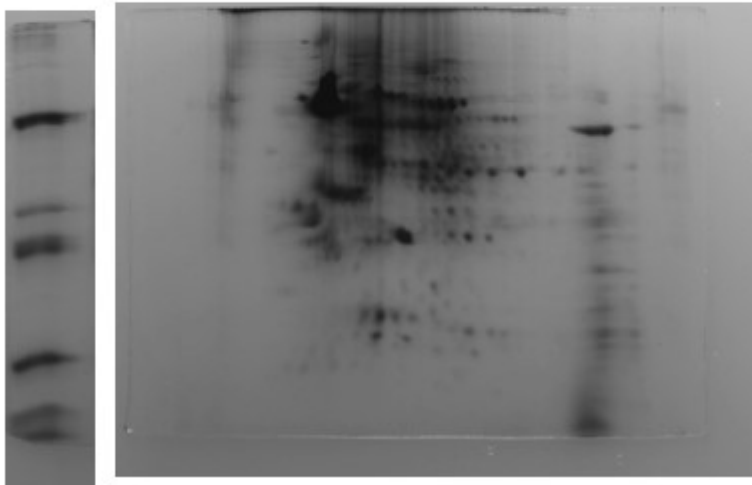

**Figure S3.** Raw Data from Figure 3 showing separately panels A, B, and C.

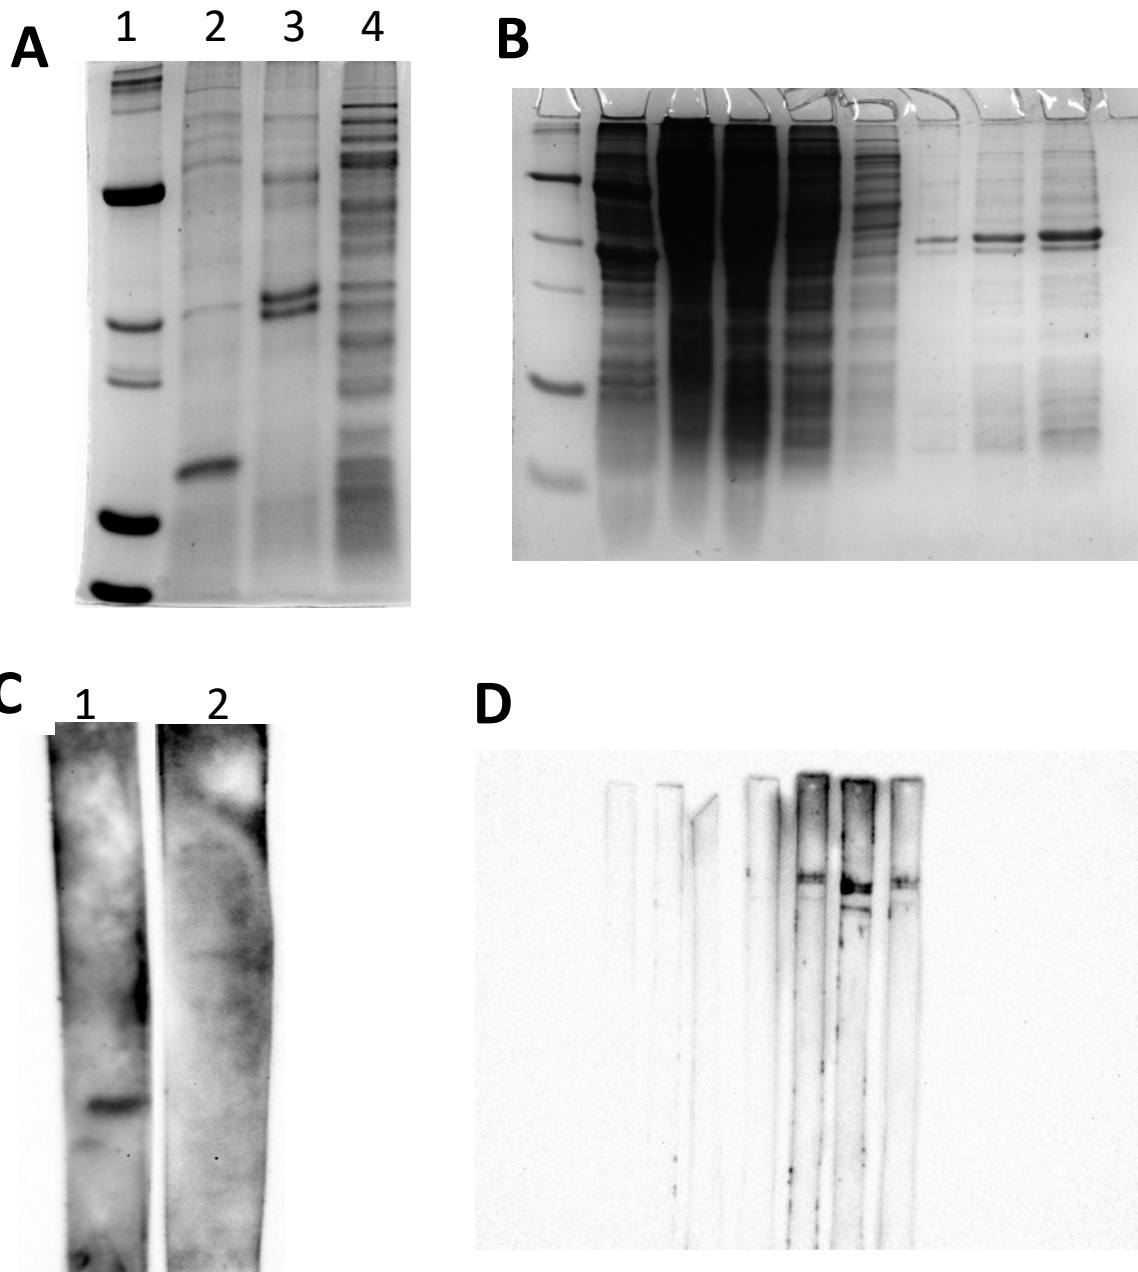

**Figure S4.** Raw Data from Figure 5. Panel A: SDS-PAGE of recombinant apple proteins. Line 1: Molecular weight markers; Line 2: Mal d 1; Line 3: GAPDH; Line 4: Annexin. Panel B: SDS-PAGE of recombinant GAPDH purified at different grades. Panel C: Western blot of Mal d 1 (line 1) and Annexin (line 2). Panel D: Western blot of GAPDH using sera from different patients.
